# Supplementary material
Source: Research Square preprint supplement (doi:10.21203/rs.3.rs-10100840/v1)
Supplement: Supplementary file 1 [file dde4224b79671ab86fd41128.xlsx]

## Sheet: Feuil1
Image.path	Image	Longitude	Latitude	Make	Intervals	FOV	Height	Scope	Install_Date	Install_Time	Uninstall_Date	Uninstall_Time	Date	Dates	Time	Time.in.radians	Sample.Label	Species	distance	Angle	Region.Label	D_track	D_villages	Villages	Areas	datetime	datetime.install	datetime.uninstall	size	object	fraction	Area
C:\Users\user-1\Desktop\My_PHD\5_Redaction_These\Chap2_Metabarcoding & Census\Census\1_Data_Collection\Dossier4\C027\Crossarchus obscurus\DSCF0003.JPG	DSCF0003.JPG	405682	768980	GardePro	10s	120	0.6	30	2024-06-24	11:13:40	2024-12-31	10:13:40	2024:06:25	2024-06-25	6:34:40	1.722	C027	Crossarchus platycephalus	5	0	DF	1322.08	3769.26	Koto	3302.8	2024-06-25 6:34:40	2024-06-24 11:13:40	2024-12-31 10:13:40	1	1	0.333	33.028
C:\Users\user-1\Desktop\My_PHD\5_Redaction_These\Chap2_Metabarcoding & Census\Census\1_Data_Collection\Dossier4\C027\Crossarchus obscurus\DSCF0004.JPG	DSCF0004.JPG	405682	768980	GardePro	10s	120	0.6	30	2024-06-24	11:13:40	2024-12-31	10:13:40	2024:06:25	2024-06-25	6:34:41	1.722	C027	Crossarchus platycephalus	5	0	DF	1322.08	3769.26	Koto	3302.8	2024-06-25 6:34:41	2024-06-24 11:13:40	2024-12-31 10:13:40	1	2	0.333	33.028
C:\Users\user-1\Desktop\My_PHD\5_Redaction_These\Chap2_Metabarcoding & Census\Census\1_Data_Collection\Dossier4\C027\Crossarchus obscurus\DSCF0005.JPG	DSCF0005.JPG	405682	768980	GardePro	10s	120	0.6	30	2024-06-24	11:13:40	2024-12-31	10:13:40	2024:06:25	2024-06-25	6:35:30	1.726	C027	Crossarchus platycephalus	5	30	DF	1322.08	3769.26	Koto	3302.8	2024-06-25 6:35:30	2024-06-24 11:13:40	2024-12-31 10:13:40	1	3	0.333	33.028
C:\Users\user-1\Desktop\My_PHD\5_Redaction_These\Chap2_Metabarcoding & Census\Census\1_Data_Collection\Dossier4\C027\Crossarchus obscurus\DSCF0005.JPG	DSCF0005.JPG	405682	768980	GardePro	10s	120	0.6	30	2024-06-24	11:13:40	2024-12-31	10:13:40	2024:06:25	2024-06-25	6:35:30	1.726	C027	Crossarchus platycephalus	5	30	DF	1322.08	3769.26	Koto	3302.8	2024-06-25 6:35:30	2024-06-24 11:13:40	2024-12-31 10:13:40	1	4	0.333	33.028
C:\Users\user-1\Desktop\My_PHD\5_Redaction_These\Chap2_Metabarcoding & Census\Census\1_Data_Collection\Dossier4\C027\Crossarchus obscurus\DSCF0006.JPG	DSCF0006.JPG	405682	768980	GardePro	10s	120	0.6	30	2024-06-24	11:13:40	2024-12-31	10:13:40	2024:06:25	2024-06-25	6:35:31	1.726	C027	Crossarchus platycephalus	5	30	DF	1322.08	3769.26	Koto	3302.8	2024-06-25 6:35:31	2024-06-24 11:13:40	2024-12-31 10:13:40	1	5	0.333	33.028
C:\Users\user-1\Desktop\My_PHD\5_Redaction_These\Chap2_Metabarcoding & Census\Census\1_Data_Collection\Dossier4\C027\Crossarchus obscurus\DSCF0006.JPG	DSCF0006.JPG	405682	768980	GardePro	10s	120	0.6	30	2024-06-24	11:13:40	2024-12-31	10:13:40	2024:06:25	2024-06-25	6:35:31	1.726	C027	Crossarchus platycephalus	5	30	DF	1322.08	3769.26	Koto	3302.8	2024-06-25 6:35:31	2024-06-24 11:13:40	2024-12-31 10:13:40	1	6	0.333	33.028
C:\Users\user-1\Desktop\My_PHD\5_Redaction_These\Chap2_Metabarcoding & Census\Census\1_Data_Collection\Dossier4\C027\Crossarchus obscurus\DSCF0007.JPG	DSCF0007.JPG	405682	768980	GardePro	10s	120	0.6	30	2024-06-24	11:13:40	2024-12-31	10:13:40	2024:06:25	2024-06-25	12:01:41	3.149	C027	Crossarchus platycephalus	5	0	DF	1322.08	3769.26	Koto	3302.8	2024-06-25 12:01:41	2024-06-24 11:13:40	2024-12-31 10:13:40	1	7	0.333	33.028
C:\Users\user-1\Desktop\My_PHD\5_Redaction_These\Chap2_Metabarcoding & Census\Census\1_Data_Collection\Dossier4\C027\Crossarchus obscurus\DSCF0008.JPG	DSCF0008.JPG	405682	768980	GardePro	10s	120	0.6	30	2024-06-24	11:13:40	2024-12-31	10:13:40	2024:06:25	2024-06-25	12:01:42	3.149	C027	Crossarchus platycephalus	5	0	DF	1322.08	3769.26	Koto	3302.8	2024-06-25 12:01:42	2024-06-24 11:13:40	2024-12-31 10:13:40	1	8	0.333	33.028
C:\Users\user-1\Desktop\My_PHD\5_Redaction_These\Chap2_Metabarcoding & Census\Census\1_Data_Collection\Dossier4\C027\Crossarchus obscurus\DSCF0009.JPG	DSCF0009.JPG	405682	768980	GardePro	10s	120	0.6	30	2024-06-24	11:13:40	2024-12-31	10:13:40	2024:06:25	2024-06-25	12:01:50	3.15	C027	Crossarchus platycephalus	7	45	DF	1322.08	3769.26	Koto	3302.8	2024-06-25 12:01:50	2024-06-24 11:13:40	2024-12-31 10:13:40	1	9	0.333	33.028
C:\Users\user-1\Desktop\My_PHD\5_Redaction_These\Chap2_Metabarcoding & Census\Census\1_Data_Collection\Dossier4\C027\Crossarchus obscurus\DSCF0010.JPG	DSCF0010.JPG	405682	768980	GardePro	10s	120	0.6	30	2024-06-24	11:13:40	2024-12-31	10:13:40	2024:06:25	2024-06-25	12:01:51	3.15	C027	Crossarchus platycephalus	7	45	DF	1322.08	3769.26	Koto	3302.8	2024-06-25 12:01:51	2024-06-24 11:13:40	2024-12-31 10:13:40	1	10	0.333	33.028
C:\Users\user-1\Desktop\My_PHD\5_Redaction_These\Chap2_Metabarcoding & Census\Census\1_Data_Collection\Dossier4\C027\Crossarchus obscurus\DSCF0011.JPG	DSCF0011.JPG	405682	768980	GardePro	10s	120	0.6	30	2024-06-24	11:13:40	2024-12-31	10:13:40	2024:06:25	2024-06-25	12:03:23	3.156	C027	Crossarchus platycephalus	5	-40	DF	1322.08	3769.26	Koto	3302.8	2024-06-25 12:03:23	2024-06-24 11:13:40	2024-12-31 10:13:40	1	11	0.333	33.028
C:\Users\user-1\Desktop\My_PHD\5_Redaction_These\Chap2_Metabarcoding & Census\Census\1_Data_Collection\Dossier4\C027\Crossarchus obscurus\DSCF0011.JPG	DSCF0011.JPG	405682	768980	GardePro	10s	120	0.6	30	2024-06-24	11:13:40	2024-12-31	10:13:40	2024:06:25	2024-06-25	12:03:23	3.156	C027	Crossarchus platycephalus	5	-40	DF	1322.08	3769.26	Koto	3302.8	2024-06-25 12:03:23	2024-06-24 11:13:40	2024-12-31 10:13:40	1	12	0.333	33.028
C:\Users\user-1\Desktop\My_PHD\5_Redaction_These\Chap2_Metabarcoding & Census\Census\1_Data_Collection\Dossier4\C027\Crossarchus obscurus\DSCF0011.JPG	DSCF0011.JPG	405682	768980	GardePro	10s	120	0.6	30	2024-06-24	11:13:40	2024-12-31	10:13:40	2024:06:25	2024-06-25	12:03:23	3.156	C027	Crossarchus platycephalus	5	-40	DF	1322.08	3769.26	Koto	3302.8	2024-06-25 12:03:23	2024-06-24 11:13:40	2024-12-31 10:13:40	1	13	0.333	33.028
C:\Users\user-1\Desktop\My_PHD\5_Redaction_These\Chap2_Metabarcoding & Census\Census\1_Data_Collection\Dossier4\C027\Crossarchus obscurus\DSCF0012.JPG	DSCF0012.JPG	405682	768980	GardePro	10s	120	0.6	30	2024-06-24	11:13:40	2024-12-31	10:13:40	2024:06:25	2024-06-25	12:03:24	3.156	C027	Crossarchus platycephalus	5	-40	DF	1322.08	3769.26	Koto	3302.8	2024-06-25 12:03:24	2024-06-24 11:13:40	2024-12-31 10:13:40	1	14	0.333	33.028
C:\Users\user-1\Desktop\My_PHD\5_Redaction_These\Chap2_Metabarcoding & Census\Census\1_Data_Collection\Dossier4\C027\Crossarchus obscurus\DSCF0012.JPG	DSCF0012.JPG	405682	768980	GardePro	10s	120	0.6	30	2024-06-24	11:13:40	2024-12-31	10:13:40	2024:06:25	2024-06-25	12:03:24	3.156	C027	Crossarchus platycephalus	5	-40	DF	1322.08	3769.26	Koto	3302.8	2024-06-25 12:03:24	2024-06-24 11:13:40	2024-12-31 10:13:40	1	15	0.333	33.028
C:\Users\user-1\Desktop\My_PHD\5_Redaction_These\Chap2_Metabarcoding & Census\Census\1_Data_Collection\Dossier4\C027\Crossarchus obscurus\DSCF0012.JPG	DSCF0012.JPG	405682	768980	GardePro	10s	120	0.6	30	2024-06-24	11:13:40	2024-12-31	10:13:40	2024:06:25	2024-06-25	12:03:24	3.156	C027	Crossarchus platycephalus	5	-40	DF	1322.08	3769.26	Koto	3302.8	2024-06-25 12:03:24	2024-06-24 11:13:40	2024-12-31 10:13:40	1	16	0.333	33.028
C:\Users\user-1\Desktop\My_PHD\5_Redaction_These\Chap2_Metabarcoding & Census\Census\1_Data_Collection\Dossier4\C027\Crossarchus obscurus\DSCF0013.JPG	DSCF0013.JPG	405682	768980	GardePro	10s	120	0.6	30	2024-06-24	11:13:40	2024-12-31	10:13:40	2024:06:25	2024-06-25	12:13:35	3.201	C027	Crossarchus platycephalus	6.5	40	DF	1322.08	3769.26	Koto	3302.8	2024-06-25 12:13:35	2024-06-24 11:13:40	2024-12-31 10:13:40	1	17	0.333	33.028
C:\Users\user-1\Desktop\My_PHD\5_Redaction_These\Chap2_Metabarcoding & Census\Census\1_Data_Collection\Dossier4\C027\Crossarchus obscurus\DSCF0014.JPG	DSCF0014.JPG	405682	768980	GardePro	10s	120	0.6	30	2024-06-24	11:13:40	2024-12-31	10:13:40	2024:06:25	2024-06-25	12:13:36	3.201	C027	Crossarchus platycephalus	6.5	40	DF	1322.08	3769.26	Koto	3302.8	2024-06-25 12:13:36	2024-06-24 11:13:40	2024-12-31 10:13:40	1	18	0.333	33.028
C:\Users\user-1\Desktop\My_PHD\5_Redaction_These\Chap2_Metabarcoding & Census\Census\1_Data_Collection\Dossier4\C027\Genetta genetta\DSCF0001.JPG	DSCF0001.JPG	405682	768980	GardePro	10s	120	0.6	30	2024-06-24	11:13:40	2024-12-31	10:13:40	2024:06:25	2024-06-25	0:19:58	0.087	C027	Genetta pardina/maculata	6.5	20	DF	1322.08	3769.26	Koto	3302.8	2024-06-25 0:19:58	2024-06-24 11:13:40	2024-12-31 10:13:40	1	19	0.333	33.028
C:\Users\user-1\Desktop\My_PHD\5_Redaction_These\Chap2_Metabarcoding & Census\Census\1_Data_Collection\Dossier4\C027\Genetta genetta\DSCF0002.JPG	DSCF0002.JPG	405682	768980	GardePro	10s	120	0.6	30	2024-06-24	11:13:40	2024-12-31	10:13:40	2024:06:25	2024-06-25	0:19:59	0.087	C027	Genetta pardina/maculata	6.5	25	DF	1322.08	3769.26	Koto	3302.8	2024-06-25 0:19:59	2024-06-24 11:13:40	2024-12-31 10:13:40	1	20	0.333	33.028
C:\Users\user-1\Desktop\My_PHD\5_Redaction_These\Chap2_Metabarcoding & Census\Census\1_Data_Collection\Dossier4\C027\Crossarchus obscurus\DSCF0023.JPG	DSCF0023.JPG	405682	768980	GardePro	10s	120	0.6	30	2024-06-24	11:13:40	2024-12-31	10:13:40	2024:06:26	2024-06-26	11:51:29	3.104	C027	Crossarchus platycephalus	5	30	DF	1322.08	3769.26	Koto	3302.8	2024-06-26 11:51:29	2024-06-24 11:13:40	2024-12-31 10:13:40	1	21	0.333	33.028
C:\Users\user-1\Desktop\My_PHD\5_Redaction_These\Chap2_Metabarcoding & Census\Census\1_Data_Collection\Dossier4\C027\Crossarchus obscurus\DSCF0024.JPG	DSCF0024.JPG	405682	768980	GardePro	10s	120	0.6	30	2024-06-24	11:13:40	2024-12-31	10:13:40	2024:06:26	2024-06-26	11:51:29	3.104	C027	Crossarchus platycephalus	5	30	DF	1322.08	3769.26	Koto	3302.8	2024-06-26 11:51:29	2024-06-24 11:13:40	2024-12-31 10:13:40	1	22	0.333	33.028
C:\Users\user-1\Desktop\My_PHD\5_Redaction_These\Chap2_Metabarcoding & Census\Census\1_Data_Collection\Dossier4\C027\Crossarchus obscurus\DSCF0025.JPG	DSCF0025.JPG	405682	768980	GardePro	10s	120	0.6	30	2024-06-24	11:13:40	2024-12-31	10:13:40	2024:06:26	2024-06-26	11:52:05	3.107	C027	Crossarchus platycephalus	4	-40	DF	1322.08	3769.26	Koto	3302.8	2024-06-26 11:52:05	2024-06-24 11:13:40	2024-12-31 10:13:40	1	23	0.333	33.028
C:\Users\user-1\Desktop\My_PHD\5_Redaction_These\Chap2_Metabarcoding & Census\Census\1_Data_Collection\Dossier4\C027\Crossarchus obscurus\DSCF0025.JPG	DSCF0025.JPG	405682	768980	GardePro	10s	120	0.6	30	2024-06-24	11:13:40	2024-12-31	10:13:40	2024:06:26	2024-06-26	11:52:05	3.107	C027	Crossarchus platycephalus	4	-40	DF	1322.08	3769.26	Koto	3302.8	2024-06-26 11:52:05	2024-06-24 11:13:40	2024-12-31 10:13:40	1	24	0.333	33.028
C:\Users\user-1\Desktop\My_PHD\5_Redaction_These\Chap2_Metabarcoding & Census\Census\1_Data_Collection\Dossier4\C027\Crossarchus obscurus\DSCF0026.JPG	DSCF0026.JPG	405682	768980	GardePro	10s	120	0.6	30	2024-06-24	11:13:40	2024-12-31	10:13:40	2024:06:26	2024-06-26	11:52:06	3.107	C027	Crossarchus platycephalus	4	-40	DF	1322.08	3769.26	Koto	3302.8	2024-06-26 11:52:06	2024-06-24 11:13:40	2024-12-31 10:13:40	1	25	0.333	33.028
C:\Users\user-1\Desktop\My_PHD\5_Redaction_These\Chap2_Metabarcoding & Census\Census\1_Data_Collection\Dossier4\C027\Crossarchus obscurus\DSCF0026.JPG	DSCF0026.JPG	405682	768980	GardePro	10s	120	0.6	30	2024-06-24	11:13:40	2024-12-31	10:13:40	2024:06:26	2024-06-26	11:52:06	3.107	C027	Crossarchus platycephalus	4	-40	DF	1322.08	3769.26	Koto	3302.8	2024-06-26 11:52:06	2024-06-24 11:13:40	2024-12-31 10:13:40	1	26	0.333	33.028
C:\Users\user-1\Desktop\My_PHD\5_Redaction_These\Chap2_Metabarcoding & Census\Census\1_Data_Collection\Dossier4\C027\Crossarchus obscurus\DSCF0027.JPG	DSCF0027.JPG	405682	768980	GardePro	10s	120	0.6	30	2024-06-24	11:13:40	2024-12-31	10:13:40	2024:06:26	2024-06-26	11:52:12	3.108	C027	Crossarchus platycephalus	4	-30	DF	1322.08	3769.26	Koto	3302.8	2024-06-26 11:52:12	2024-06-24 11:13:40	2024-12-31 10:13:40	1	27	0.333	33.028
C:\Users\user-1\Desktop\My_PHD\5_Redaction_These\Chap2_Metabarcoding & Census\Census\1_Data_Collection\Dossier4\C027\Crossarchus obscurus\DSCF0027.JPG	DSCF0027.JPG	405682	768980	GardePro	10s	120	0.6	30	2024-06-24	11:13:40	2024-12-31	10:13:40	2024:06:26	2024-06-26	11:52:12	3.108	C027	Crossarchus platycephalus	4	-30	DF	1322.08	3769.26	Koto	3302.8	2024-06-26 11:52:12	2024-06-24 11:13:40	2024-12-31 10:13:40	1	28	0.333	33.028
C:\Users\user-1\Desktop\My_PHD\5_Redaction_These\Chap2_Metabarcoding & Census\Census\1_Data_Collection\Dossier4\C027\Crossarchus obscurus\DSCF0027.JPG	DSCF0027.JPG	405682	768980	GardePro	10s	120	0.6	30	2024-06-24	11:13:40	2024-12-31	10:13:40	2024:06:26	2024-06-26	11:52:12	3.108	C027	Crossarchus platycephalus	4	-30	DF	1322.08	3769.26	Koto	3302.8	2024-06-26 11:52:12	2024-06-24 11:13:40	2024-12-31 10:13:40	1	29	0.333	33.028
C:\Users\user-1\Desktop\My_PHD\5_Redaction_These\Chap2_Metabarcoding & Census\Census\1_Data_Collection\Dossier4\C027\Crossarchus obscurus\DSCF0028.JPG	DSCF0028.JPG	405682	768980	GardePro	10s	120	0.6	30	2024-06-24	11:13:40	2024-12-31	10:13:40	2024:06:26	2024-06-26	11:52:13	3.108	C027	Crossarchus platycephalus	4	-30	DF	1322.08	3769.26	Koto	3302.8	2024-06-26 11:52:13	2024-06-24 11:13:40	2024-12-31 10:13:40	1	30	0.333	33.028
C:\Users\user-1\Desktop\My_PHD\5_Redaction_These\Chap2_Metabarcoding & Census\Census\1_Data_Collection\Dossier4\C027\Crossarchus obscurus\DSCF0028.JPG	DSCF0028.JPG	405682	768980	GardePro	10s	120	0.6	30	2024-06-24	11:13:40	2024-12-31	10:13:40	2024:06:26	2024-06-26	11:52:13	3.108	C027	Crossarchus platycephalus	4	-30	DF	1322.08	3769.26	Koto	3302.8	2024-06-26 11:52:13	2024-06-24 11:13:40	2024-12-31 10:13:40	1	31	0.333	33.028
C:\Users\user-1\Desktop\My_PHD\5_Redaction_These\Chap2_Metabarcoding & Census\Census\1_Data_Collection\Dossier4\C027\Crossarchus obscurus\DSCF0028.JPG	DSCF0028.JPG	405682	768980	GardePro	10s	120	0.6	30	2024-06-24	11:13:40	2024-12-31	10:13:40	2024:06:26	2024-06-26	11:52:13	3.108	C027	Crossarchus platycephalus	4	-30	DF	1322.08	3769.26	Koto	3302.8	2024-06-26 11:52:13	2024-06-24 11:13:40	2024-12-31 10:13:40	1	32	0.333	33.028
C:\Users\user-1\Desktop\My_PHD\5_Redaction_These\Chap2_Metabarcoding & Census\Census\1_Data_Collection\Dossier4\C027\Crossarchus obscurus\DSCF0028.JPG	DSCF0028.JPG	405682	768980	GardePro	10s	120	0.6	30	2024-06-24	11:13:40	2024-12-31	10:13:40	2024:06:26	2024-06-26	11:52:13	3.108	C027	Crossarchus platycephalus	4	-30	DF	1322.08	3769.26	Koto	3302.8	2024-06-26 11:52:13	2024-06-24 11:13:40	2024-12-31 10:13:40	1	33	0.333	33.028
C:\Users\user-1\Desktop\My_PHD\5_Redaction_These\Chap2_Metabarcoding & Census\Census\1_Data_Collection\Dossier4\C027\Crossarchus obscurus\DSCF0029.JPG	DSCF0029.JPG	405682	768980	GardePro	10s	120	0.6	30	2024-06-24	11:13:40	2024-12-31	10:13:40	2024:06:26	2024-06-26	11:52:18	3.108	C027	Crossarchus platycephalus	4	0	DF	1322.08	3769.26	Koto	3302.8	2024-06-26 11:52:18	2024-06-24 11:13:40	2024-12-31 10:13:40	1	34	0.333	33.028
C:\Users\user-1\Desktop\My_PHD\5_Redaction_These\Chap2_Metabarcoding & Census\Census\1_Data_Collection\Dossier4\C027\Crossarchus obscurus\DSCF0029.JPG	DSCF0029.JPG	405682	768980	GardePro	10s	120	0.6	30	2024-06-24	11:13:40	2024-12-31	10:13:40	2024:06:26	2024-06-26	11:52:18	3.108	C027	Crossarchus platycephalus	4	0	DF	1322.08	3769.26	Koto	3302.8	2024-06-26 11:52:18	2024-06-24 11:13:40	2024-12-31 10:13:40	1	35	0.333	33.028
C:\Users\user-1\Desktop\My_PHD\5_Redaction_These\Chap2_Metabarcoding & Census\Census\1_Data_Collection\Dossier4\C027\Crossarchus obscurus\DSCF0029.JPG	DSCF0029.JPG	405682	768980	GardePro	10s	120	0.6	30	2024-06-24	11:13:40	2024-12-31	10:13:40	2024:06:26	2024-06-26	11:52:18	3.108	C027	Crossarchus platycephalus	4	0	DF	1322.08	3769.26	Koto	3302.8	2024-06-26 11:52:18	2024-06-24 11:13:40	2024-12-31 10:13:40	1	36	0.333	33.028
C:\Users\user-1\Desktop\My_PHD\5_Redaction_These\Chap2_Metabarcoding & Census\Census\1_Data_Collection\Dossier4\C027\Crossarchus obscurus\DSCF0029.JPG	DSCF0029.JPG	405682	768980	GardePro	10s	120	0.6	30	2024-06-24	11:13:40	2024-12-31	10:13:40	2024:06:26	2024-06-26	11:52:18	3.108	C027	Crossarchus platycephalus	4	0	DF	1322.08	3769.26	Koto	3302.8	2024-06-26 11:52:18	2024-06-24 11:13:40	2024-12-31 10:13:40	1	37	0.333	33.028
C:\Users\user-1\Desktop\My_PHD\5_Redaction_These\Chap2_Metabarcoding & Census\Census\1_Data_Collection\Dossier4\C027\Crossarchus obscurus\DSCF0030.JPG	DSCF0030.JPG	405682	768980	GardePro	10s	120	0.6	30	2024-06-24	11:13:40	2024-12-31	10:13:40	2024:06:26	2024-06-26	11:52:19	3.108	C027	Crossarchus platycephalus	4	0	DF	1322.08	3769.26	Koto	3302.8	2024-06-26 11:52:19	2024-06-24 11:13:40	2024-12-31 10:13:40	1	38	0.333	33.028
C:\Users\user-1\Desktop\My_PHD\5_Redaction_These\Chap2_Metabarcoding & Census\Census\1_Data_Collection\Dossier4\C027\Crossarchus obscurus\DSCF0030.JPG	DSCF0030.JPG	405682	768980	GardePro	10s	120	0.6	30	2024-06-24	11:13:40	2024-12-31	10:13:40	2024:06:26	2024-06-26	11:52:19	3.108	C027	Crossarchus platycephalus	4	0	DF	1322.08	3769.26	Koto	3302.8	2024-06-26 11:52:19	2024-06-24 11:13:40	2024-12-31 10:13:40	1	39	0.333	33.028
C:\Users\user-1\Desktop\My_PHD\5_Redaction_These\Chap2_Metabarcoding & Census\Census\1_Data_Collection\Dossier4\C027\Crossarchus obscurus\DSCF0030.JPG	DSCF0030.JPG	405682	768980	GardePro	10s	120	0.6	30	2024-06-24	11:13:40	2024-12-31	10:13:40	2024:06:26	2024-06-26	11:52:19	3.108	C027	Crossarchus platycephalus	4	0	DF	1322.08	3769.26	Koto	3302.8	2024-06-26 11:52:19	2024-06-24 11:13:40	2024-12-31 10:13:40	1	40	0.333	33.028
C:\Users\user-1\Desktop\My_PHD\5_Redaction_These\Chap2_Metabarcoding & Census\Census\1_Data_Collection\Dossier4\C027\Crossarchus obscurus\DSCF0030.JPG	DSCF0030.JPG	405682	768980	GardePro	10s	120	0.6	30	2024-06-24	11:13:40	2024-12-31	10:13:40	2024:06:26	2024-06-26	11:52:19	3.108	C027	Crossarchus platycephalus	4	0	DF	1322.08	3769.26	Koto	3302.8	2024-06-26 11:52:19	2024-06-24 11:13:40	2024-12-31 10:13:40	1	41	0.333	33.028
C:\Users\user-1\Desktop\My_PHD\5_Redaction_These\Chap2_Metabarcoding & Census\Census\1_Data_Collection\Dossier4\C027\Crossarchus obscurus\DSCF0031.JPG	DSCF0031.JPG	405682	768980	GardePro	10s	120	0.6	30	2024-06-24	11:13:40	2024-12-31	10:13:40	2024:06:26	2024-06-26	11:52:25	3.109	C027	Crossarchus platycephalus	4	10	DF	1322.08	3769.26	Koto	3302.8	2024-06-26 11:52:25	2024-06-24 11:13:40	2024-12-31 10:13:40	1	42	0.333	33.028
C:\Users\user-1\Desktop\My_PHD\5_Redaction_These\Chap2_Metabarcoding & Census\Census\1_Data_Collection\Dossier4\C027\Crossarchus obscurus\DSCF0031.JPG	DSCF0031.JPG	405682	768980	GardePro	10s	120	0.6	30	2024-06-24	11:13:40	2024-12-31	10:13:40	2024:06:26	2024-06-26	11:52:25	3.109	C027	Crossarchus platycephalus	4	10	DF	1322.08	3769.26	Koto	3302.8	2024-06-26 11:52:25	2024-06-24 11:13:40	2024-12-31 10:13:40	1	43	0.333	33.028
C:\Users\user-1\Desktop\My_PHD\5_Redaction_These\Chap2_Metabarcoding & Census\Census\1_Data_Collection\Dossier4\C027\Crossarchus obscurus\DSCF0031.JPG	DSCF0031.JPG	405682	768980	GardePro	10s	120	0.6	30	2024-06-24	11:13:40	2024-12-31	10:13:40	2024:06:26	2024-06-26	11:52:25	3.109	C027	Crossarchus platycephalus	4	10	DF	1322.08	3769.26	Koto	3302.8	2024-06-26 11:52:25	2024-06-24 11:13:40	2024-12-31 10:13:40	1	44	0.333	33.028
C:\Users\user-1\Desktop\My_PHD\5_Redaction_These\Chap2_Metabarcoding & Census\Census\1_Data_Collection\Dossier4\C027\Crossarchus obscurus\DSCF0031.JPG	DSCF0031.JPG	405682	768980	GardePro	10s	120	0.6	30	2024-06-24	11:13:40	2024-12-31	10:13:40	2024:06:26	2024-06-26	11:52:25	3.109	C027	Crossarchus platycephalus	4	10	DF	1322.08	3769.26	Koto	3302.8	2024-06-26 11:52:25	2024-06-24 11:13:40	2024-12-31 10:13:40	1	45	0.333	33.028
C:\Users\user-1\Desktop\My_PHD\5_Redaction_These\Chap2_Metabarcoding & Census\Census\1_Data_Collection\Dossier4\C027\Crossarchus obscurus\DSCF0032.JPG	DSCF0032.JPG	405682	768980	GardePro	10s	120	0.6	30	2024-06-24	11:13:40	2024-12-31	10:13:40	2024:06:26	2024-06-26	11:52:26	3.109	C027	Crossarchus platycephalus	4	0	DF	1322.08	3769.26	Koto	3302.8	2024-06-26 11:52:26	2024-06-24 11:13:40	2024-12-31 10:13:40	1	46	0.333	33.028
C:\Users\user-1\Desktop\My_PHD\5_Redaction_These\Chap2_Metabarcoding & Census\Census\1_Data_Collection\Dossier4\C027\Crossarchus obscurus\DSCF0032.JPG	DSCF0032.JPG	405682	768980	GardePro	10s	120	0.6	30	2024-06-24	11:13:40	2024-12-31	10:13:40	2024:06:26	2024-06-26	11:52:26	3.109	C027	Crossarchus platycephalus	4	0	DF	1322.08	3769.26	Koto	3302.8	2024-06-26 11:52:26	2024-06-24 11:13:40	2024-12-31 10:13:40	1	47	0.333	33.028
C:\Users\user-1\Desktop\My_PHD\5_Redaction_These\Chap2_Metabarcoding & Census\Census\1_Data_Collection\Dossier4\C027\Crossarchus obscurus\DSCF0032.JPG	DSCF0032.JPG	405682	768980	GardePro	10s	120	0.6	30	2024-06-24	11:13:40	2024-12-31	10:13:40	2024:06:26	2024-06-26	11:52:26	3.109	C027	Crossarchus platycephalus	4	0	DF	1322.08	3769.26	Koto	3302.8	2024-06-26 11:52:26	2024-06-24 11:13:40	2024-12-31 10:13:40	1	48	0.333	33.028
C:\Users\user-1\Desktop\My_PHD\5_Redaction_These\Chap2_Metabarcoding & Census\Census\1_Data_Collection\Dossier4\C027\Crossarchus obscurus\DSCF0032.JPG	DSCF0032.JPG	405682	768980	GardePro	10s	120	0.6	30	2024-06-24	11:13:40	2024-12-31	10:13:40	2024:06:26	2024-06-26	11:52:26	3.109	C027	Crossarchus platycephalus	4	0	DF	1322.08	3769.26	Koto	3302.8	2024-06-26 11:52:26	2024-06-24 11:13:40	2024-12-31 10:13:40	1	49	0.333	33.028
C:\Users\user-1\Desktop\My_PHD\5_Redaction_These\Chap2_Metabarcoding & Census\Census\1_Data_Collection\Dossier4\C027\Crossarchus obscurus\DSCF0033.JPG	DSCF0033.JPG	405682	768980	GardePro	10s	120	0.6	30	2024-06-24	11:13:40	2024-12-31	10:13:40	2024:06:26	2024-06-26	11:52:32	3.109	C027	Crossarchus platycephalus	6.5	40	DF	1322.08	3769.26	Koto	3302.8	2024-06-26 11:52:32	2024-06-24 11:13:40	2024-12-31 10:13:40	1	50	0.333	33.028
C:\Users\user-1\Desktop\My_PHD\5_Redaction_These\Chap2_Metabarcoding & Census\Census\1_Data_Collection\Dossier4\C027\Crossarchus obscurus\DSCF0033.JPG	DSCF0033.JPG	405682	768980	GardePro	10s	120	0.6	30	2024-06-24	11:13:40	2024-12-31	10:13:40	2024:06:26	2024-06-26	11:52:32	3.109	C027	Crossarchus platycephalus	6.5	40	DF	1322.08	3769.26	Koto	3302.8	2024-06-26 11:52:32	2024-06-24 11:13:40	2024-12-31 10:13:40	1	51	0.333	33.028
C:\Users\user-1\Desktop\My_PHD\5_Redaction_These\Chap2_Metabarcoding & Census\Census\1_Data_Collection\Dossier4\C027\Crossarchus obscurus\DSCF0033.JPG	DSCF0033.JPG	405682	768980	GardePro	10s	120	0.6	30	2024-06-24	11:13:40	2024-12-31	10:13:40	2024:06:26	2024-06-26	11:52:32	3.109	C027	Crossarchus platycephalus	6.5	40	DF	1322.08	3769.26	Koto	3302.8	2024-06-26 11:52:32	2024-06-24 11:13:40	2024-12-31 10:13:40	1	52	0.333	33.028
C:\Users\user-1\Desktop\My_PHD\5_Redaction_These\Chap2_Metabarcoding & Census\Census\1_Data_Collection\Dossier4\C027\Crossarchus obscurus\DSCF0033.JPG	DSCF0033.JPG	405682	768980	GardePro	10s	120	0.6	30	2024-06-24	11:13:40	2024-12-31	10:13:40	2024:06:26	2024-06-26	11:52:32	3.109	C027	Crossarchus platycephalus	6.5	40	DF	1322.08	3769.26	Koto	3302.8	2024-06-26 11:52:32	2024-06-24 11:13:40	2024-12-31 10:13:40	1	53	0.333	33.028
C:\Users\user-1\Desktop\My_PHD\5_Redaction_These\Chap2_Metabarcoding & Census\Census\1_Data_Collection\Dossier4\C027\Crossarchus obscurus\DSCF0034.JPG	DSCF0034.JPG	405682	768980	GardePro	10s	120	0.6	30	2024-06-24	11:13:40	2024-12-31	10:13:40	2024:06:26	2024-06-26	11:52:33	3.109	C027	Crossarchus platycephalus	6.5	40	DF	1322.08	3769.26	Koto	3302.8	2024-06-26 11:52:33	2024-06-24 11:13:40	2024-12-31 10:13:40	1	54	0.333	33.028
C:\Users\user-1\Desktop\My_PHD\5_Redaction_These\Chap2_Metabarcoding & Census\Census\1_Data_Collection\Dossier4\C027\Crossarchus obscurus\DSCF0034.JPG	DSCF0034.JPG	405682	768980	GardePro	10s	120	0.6	30	2024-06-24	11:13:40	2024-12-31	10:13:40	2024:06:26	2024-06-26	11:52:33	3.109	C027	Crossarchus platycephalus	6.5	40	DF	1322.08	3769.26	Koto	3302.8	2024-06-26 11:52:33	2024-06-24 11:13:40	2024-12-31 10:13:40	1	55	0.333	33.028
C:\Users\user-1\Desktop\My_PHD\5_Redaction_These\Chap2_Metabarcoding & Census\Census\1_Data_Collection\Dossier4\C027\Crossarchus obscurus\DSCF0034.JPG	DSCF0034.JPG	405682	768980	GardePro	10s	120	0.6	30	2024-06-24	11:13:40	2024-12-31	10:13:40	2024:06:26	2024-06-26	11:52:33	3.109	C027	Crossarchus platycephalus	6.5	40	DF	1322.08	3769.26	Koto	3302.8	2024-06-26 11:52:33	2024-06-24 11:13:40	2024-12-31 10:13:40	1	56	0.333	33.028
C:\Users\user-1\Desktop\My_PHD\5_Redaction_These\Chap2_Metabarcoding & Census\Census\1_Data_Collection\Dossier4\C027\Crossarchus obscurus\DSCF0034.JPG	DSCF0034.JPG	405682	768980	GardePro	10s	120	0.6	30	2024-06-24	11:13:40	2024-12-31	10:13:40	2024:06:26	2024-06-26	11:52:33	3.109	C027	Crossarchus platycephalus	6.5	40	DF	1322.08	3769.26	Koto	3302.8	2024-06-26 11:52:33	2024-06-24 11:13:40	2024-12-31 10:13:40	1	57	0.333	33.028
C:\Users\user-1\Desktop\My_PHD\5_Redaction_These\Chap2_Metabarcoding & Census\Census\1_Data_Collection\Dossier4\C027\Crossarchus obscurus\DSCF0035.JPG	DSCF0035.JPG	405682	768980	GardePro	10s	120	0.6	30	2024-06-24	11:13:40	2024-12-31	10:13:40	2024:06:26	2024-06-26	11:52:45	3.11	C027	Crossarchus platycephalus	6.5	-30	DF	1322.08	3769.26	Koto	3302.8	2024-06-26 11:52:45	2024-06-24 11:13:40	2024-12-31 10:13:40	1	58	0.333	33.028
C:\Users\user-1\Desktop\My_PHD\5_Redaction_These\Chap2_Metabarcoding & Census\Census\1_Data_Collection\Dossier4\C027\Crossarchus obscurus\DSCF0035.JPG	DSCF0035.JPG	405682	768980	GardePro	10s	120	0.6	30	2024-06-24	11:13:40	2024-12-31	10:13:40	2024:06:26	2024-06-26	11:52:45	3.11	C027	Crossarchus platycephalus	6.5	-30	DF	1322.08	3769.26	Koto	3302.8	2024-06-26 11:52:45	2024-06-24 11:13:40	2024-12-31 10:13:40	1	59	0.333	33.028
C:\Users\user-1\Desktop\My_PHD\5_Redaction_These\Chap2_Metabarcoding & Census\Census\1_Data_Collection\Dossier4\C027\Crossarchus obscurus\DSCF0035.JPG	DSCF0035.JPG	405682	768980	GardePro	10s	120	0.6	30	2024-06-24	11:13:40	2024-12-31	10:13:40	2024:06:26	2024-06-26	11:52:45	3.11	C027	Crossarchus platycephalus	6.5	-30	DF	1322.08	3769.26	Koto	3302.8	2024-06-26 11:52:45	2024-06-24 11:13:40	2024-12-31 10:13:40	1	60	0.333	33.028
C:\Users\user-1\Desktop\My_PHD\5_Redaction_These\Chap2_Metabarcoding & Census\Census\1_Data_Collection\Dossier4\C027\Crossarchus obscurus\DSCF0036.JPG	DSCF0036.JPG	405682	768980	GardePro	10s	120	0.6	30	2024-06-24	11:13:40	2024-12-31	10:13:40	2024:06:26	2024-06-26	11:52:46	3.11	C027	Crossarchus platycephalus	5	-30	DF	1322.08	3769.26	Koto	3302.8	2024-06-26 11:52:46	2024-06-24 11:13:40	2024-12-31 10:13:40	1	61	0.333	33.028
C:\Users\user-1\Desktop\My_PHD\5_Redaction_These\Chap2_Metabarcoding & Census\Census\1_Data_Collection\Dossier4\C027\Crossarchus obscurus\DSCF0036.JPG	DSCF0036.JPG	405682	768980	GardePro	10s	120	0.6	30	2024-06-24	11:13:40	2024-12-31	10:13:40	2024:06:26	2024-06-26	11:52:46	3.11	C027	Crossarchus platycephalus	5	-30	DF	1322.08	3769.26	Koto	3302.8	2024-06-26 11:52:46	2024-06-24 11:13:40	2024-12-31 10:13:40	1	62	0.333	33.028
C:\Users\user-1\Desktop\My_PHD\5_Redaction_These\Chap2_Metabarcoding & Census\Census\1_Data_Collection\Dossier4\C027\Crossarchus obscurus\DSCF0037.JPG	DSCF0037.JPG	405682	768980	GardePro	10s	120	0.6	30	2024-06-24	11:13:40	2024-12-31	10:13:40	2024:06:26	2024-06-26	11:52:57	3.111	C027	Crossarchus platycephalus	6	40	DF	1322.08	3769.26	Koto	3302.8	2024-06-26 11:52:57	2024-06-24 11:13:40	2024-12-31 10:13:40	1	63	0.333	33.028
C:\Users\user-1\Desktop\My_PHD\5_Redaction_These\Chap2_Metabarcoding & Census\Census\1_Data_Collection\Dossier4\C027\Crossarchus obscurus\DSCF0037.JPG	DSCF0037.JPG	405682	768980	GardePro	10s	120	0.6	30	2024-06-24	11:13:40	2024-12-31	10:13:40	2024:06:26	2024-06-26	11:52:57	3.111	C027	Crossarchus platycephalus	6	40	DF	1322.08	3769.26	Koto	3302.8	2024-06-26 11:52:57	2024-06-24 11:13:40	2024-12-31 10:13:40	1	64	0.333	33.028
C:\Users\user-1\Desktop\My_PHD\5_Redaction_These\Chap2_Metabarcoding & Census\Census\1_Data_Collection\Dossier4\C027\Crossarchus obscurus\DSCF0038.JPG	DSCF0038.JPG	405682	768980	GardePro	10s	120	0.6	30	2024-06-24	11:13:40	2024-12-31	10:13:40	2024:06:26	2024-06-26	11:52:58	3.111	C027	Crossarchus platycephalus	6.5	40	DF	1322.08	3769.26	Koto	3302.8	2024-06-26 11:52:58	2024-06-24 11:13:40	2024-12-31 10:13:40	1	65	0.333	33.028
C:\Users\user-1\Desktop\My_PHD\5_Redaction_These\Chap2_Metabarcoding & Census\Census\1_Data_Collection\Dossier4\C027\Crossarchus obscurus\DSCF0039.JPG	DSCF0039.JPG	405682	768980	GardePro	10s	120	0.6	30	2024-06-24	11:13:40	2024-12-31	10:13:40	2024:06:26	2024-06-26	11:57:33	3.131	C027	Crossarchus platycephalus	6.5	30	DF	1322.08	3769.26	Koto	3302.8	2024-06-26 11:57:33	2024-06-24 11:13:40	2024-12-31 10:13:40	1	66	0.333	33.028
C:\Users\user-1\Desktop\My_PHD\5_Redaction_These\Chap2_Metabarcoding & Census\Census\1_Data_Collection\Dossier4\C027\Crossarchus obscurus\DSCF0040.JPG	DSCF0040.JPG	405682	768980	GardePro	10s	120	0.6	30	2024-06-24	11:13:40	2024-12-31	10:13:40	2024:06:26	2024-06-26	11:57:34	3.131	C027	Crossarchus platycephalus	6.5	30	DF	1322.08	3769.26	Koto	3302.8	2024-06-26 11:57:34	2024-06-24 11:13:40	2024-12-31 10:13:40	1	67	0.333	33.028
C:\Users\user-1\Desktop\My_PHD\5_Redaction_These\Chap2_Metabarcoding & Census\Census\1_Data_Collection\Dossier4\C027\Crossarchus obscurus\DSCF0041.JPG	DSCF0041.JPG	405682	768980	GardePro	10s	120	0.6	30	2024-06-24	11:13:40	2024-12-31	10:13:40	2024:06:26	2024-06-26	14:29:37	3.794	C027	Crossarchus platycephalus	6.5	25	DF	1322.08	3769.26	Koto	3302.8	2024-06-26 14:29:37	2024-06-24 11:13:40	2024-12-31 10:13:40	1	68	0.333	33.028
C:\Users\user-1\Desktop\My_PHD\5_Redaction_These\Chap2_Metabarcoding & Census\Census\1_Data_Collection\Dossier4\C027\Crossarchus obscurus\DSCF0042.JPG	DSCF0042.JPG	405682	768980	GardePro	10s	120	0.6	30	2024-06-24	11:13:40	2024-12-31	10:13:40	2024:06:26	2024-06-26	14:29:38	3.794	C027	Crossarchus platycephalus	6.5	15	DF	1322.08	3769.26	Koto	3302.8	2024-06-26 14:29:38	2024-06-24 11:13:40	2024-12-31 10:13:40	1	69	0.333	33.028
C:\Users\user-1\Desktop\My_PHD\5_Redaction_These\Chap2_Metabarcoding & Census\Census\1_Data_Collection\Dossier4\C027\Crossarchus obscurus\DSCF0043.JPG	DSCF0043.JPG	405682	768980	GardePro	10s	120	0.6	30	2024-06-24	11:13:40	2024-12-31	10:13:40	2024:06:26	2024-06-26	14:31:42	3.804	C027	Crossarchus platycephalus	6.5	15	DF	1322.08	3769.26	Koto	3302.8	2024-06-26 14:31:42	2024-06-24 11:13:40	2024-12-31 10:13:40	1	70	0.333	33.028
C:\Users\user-1\Desktop\My_PHD\5_Redaction_These\Chap2_Metabarcoding & Census\Census\1_Data_Collection\Dossier4\C027\Crossarchus obscurus\DSCF0044.JPG	DSCF0044.JPG	405682	768980	GardePro	10s	120	0.6	30	2024-06-24	11:13:40	2024-12-31	10:13:40	2024:06:26	2024-06-26	14:31:43	3.804	C027	Crossarchus platycephalus	6.5	10	DF	1322.08	3769.26	Koto	3302.8	2024-06-26 14:31:43	2024-06-24 11:13:40	2024-12-31 10:13:40	1	71	0.333	33.028
C:\Users\user-1\Desktop\My_PHD\5_Redaction_These\Chap2_Metabarcoding & Census\Census\1_Data_Collection\Dossier4\C027\Crossarchus obscurus\DSCF0045.JPG	DSCF0045.JPG	405682	768980	GardePro	10s	120	0.6	30	2024-06-24	11:13:40	2024-12-31	10:13:40	2024:06:26	2024-06-26	14:33:17	3.81	C027	Crossarchus platycephalus	6.5	15	DF	1322.08	3769.26	Koto	3302.8	2024-06-26 14:33:17	2024-06-24 11:13:40	2024-12-31 10:13:40	1	72	0.333	33.028
C:\Users\user-1\Desktop\My_PHD\5_Redaction_These\Chap2_Metabarcoding & Census\Census\1_Data_Collection\Dossier4\C027\Crossarchus obscurus\DSCF0046.JPG	DSCF0046.JPG	405682	768980	GardePro	10s	120	0.6	30	2024-06-24	11:13:40	2024-12-31	10:13:40	2024:06:26	2024-06-26	14:33:18	3.81	C027	Crossarchus platycephalus	6.5	10	DF	1322.08	3769.26	Koto	3302.8	2024-06-26 14:33:18	2024-06-24 11:13:40	2024-12-31 10:13:40	1	73	0.333	33.028
C:\Users\user-1\Desktop\My_PHD\5_Redaction_These\Chap2_Metabarcoding & Census\Census\1_Data_Collection\Dossier4\C027\Crossarchus obscurus\DSCF0047.JPG	DSCF0047.JPG	405682	768980	GardePro	10s	120	0.6	30	2024-06-24	11:13:40	2024-12-31	10:13:40	2024:06:26	2024-06-26	14:33:37	3.812	C027	Crossarchus platycephalus	6.5	30	DF	1322.08	3769.26	Koto	3302.8	2024-06-26 14:33:37	2024-06-24 11:13:40	2024-12-31 10:13:40	1	74	0.333	33.028
C:\Users\user-1\Desktop\My_PHD\5_Redaction_These\Chap2_Metabarcoding & Census\Census\1_Data_Collection\Dossier4\C027\Crossarchus obscurus\DSCF0047.JPG	DSCF0047.JPG	405682	768980	GardePro	10s	120	0.6	30	2024-06-24	11:13:40	2024-12-31	10:13:40	2024:06:26	2024-06-26	14:33:37	3.812	C027	Crossarchus platycephalus	6.5	30	DF	1322.08	3769.26	Koto	3302.8	2024-06-26 14:33:37	2024-06-24 11:13:40	2024-12-31 10:13:40	1	75	0.333	33.028
C:\Users\user-1\Desktop\My_PHD\5_Redaction_These\Chap2_Metabarcoding & Census\Census\1_Data_Collection\Dossier4\C027\Crossarchus obscurus\DSCF0048.JPG	DSCF0048.JPG	405682	768980	GardePro	10s	120	0.6	30	2024-06-24	11:13:40	2024-12-31	10:13:40	2024:06:26	2024-06-26	14:33:38	3.812	C027	Crossarchus platycephalus	6.5	30	DF	1322.08	3769.26	Koto	3302.8	2024-06-26 14:33:38	2024-06-24 11:13:40	2024-12-31 10:13:40	1	76	0.333	33.028
C:\Users\user-1\Desktop\My_PHD\5_Redaction_These\Chap2_Metabarcoding & Census\Census\1_Data_Collection\Dossier4\C027\Crossarchus obscurus\DSCF0048.JPG	DSCF0048.JPG	405682	768980	GardePro	10s	120	0.6	30	2024-06-24	11:13:40	2024-12-31	10:13:40	2024:06:26	2024-06-26	14:33:38	3.812	C027	Crossarchus platycephalus	6.5	30	DF	1322.08	3769.26	Koto	3302.8	2024-06-26 14:33:38	2024-06-24 11:13:40	2024-12-31 10:13:40	1	77	0.333	33.028
C:\Users\user-1\Desktop\My_PHD\5_Redaction_These\Chap2_Metabarcoding & Census\Census\1_Data_Collection\Dossier4\C027\Crossarchus obscurus\DSCF0049.JPG	DSCF0049.JPG	405682	768980	GardePro	10s	120	0.6	30	2024-06-24	11:13:40	2024-12-31	10:13:40	2024:06:26	2024-06-26	14:33:42	3.812	C027	Crossarchus platycephalus	6.5	30	DF	1322.08	3769.26	Koto	3302.8	2024-06-26 14:33:42	2024-06-24 11:13:40	2024-12-31 10:13:40	1	78	0.333	33.028
C:\Users\user-1\Desktop\My_PHD\5_Redaction_These\Chap2_Metabarcoding & Census\Census\1_Data_Collection\Dossier4\C027\Crossarchus obscurus\DSCF0049.JPG	DSCF0049.JPG	405682	768980	GardePro	10s	120	0.6	30	2024-06-24	11:13:40	2024-12-31	10:13:40	2024:06:26	2024-06-26	14:33:42	3.812	C027	Crossarchus platycephalus	6.5	30	DF	1322.08	3769.26	Koto	3302.8	2024-06-26 14:33:42	2024-06-24 11:13:40	2024-12-31 10:13:40	1	79	0.333	33.028
C:\Users\user-1\Desktop\My_PHD\5_Redaction_These\Chap2_Metabarcoding & Census\Census\1_Data_Collection\Dossier4\C027\Crossarchus obscurus\DSCF0050.JPG	DSCF0050.JPG	405682	768980	GardePro	10s	120	0.6	30	2024-06-24	11:13:40	2024-12-31	10:13:40	2024:06:26	2024-06-26	14:33:43	3.812	C027	Crossarchus platycephalus	6.5	25	DF	1322.08	3769.26	Koto	3302.8	2024-06-26 14:33:43	2024-06-24 11:13:40	2024-12-31 10:13:40	1	80	0.333	33.028
C:\Users\user-1\Desktop\My_PHD\5_Redaction_These\Chap2_Metabarcoding & Census\Census\1_Data_Collection\Dossier4\C027\Crossarchus obscurus\DSCF0051.JPG	DSCF0051.JPG	405682	768980	GardePro	10s	120	0.6	30	2024-06-24	11:13:40	2024-12-31	10:13:40	2024:06:26	2024-06-26	14:34:06	3.814	C027	Crossarchus platycephalus	6.5	30	DF	1322.08	3769.26	Koto	3302.8	2024-06-26 14:34:06	2024-06-24 11:13:40	2024-12-31 10:13:40	1	81	0.333	33.028
C:\Users\user-1\Desktop\My_PHD\5_Redaction_These\Chap2_Metabarcoding & Census\Census\1_Data_Collection\Dossier4\C027\Crossarchus obscurus\DSCF0052.JPG	DSCF0052.JPG	405682	768980	GardePro	10s	120	0.6	30	2024-06-24	11:13:40	2024-12-31	10:13:40	2024:06:26	2024-06-26	14:34:07	3.814	C027	Crossarchus platycephalus	6.5	30	DF	1322.08	3769.26	Koto	3302.8	2024-06-26 14:34:07	2024-06-24 11:13:40	2024-12-31 10:13:40	1	82	0.333	33.028
C:\Users\user-1\Desktop\My_PHD\5_Redaction_These\Chap2_Metabarcoding & Census\Census\1_Data_Collection\Dossier4\C027\Crossarchus obscurus\DSCF0053.JPG	DSCF0053.JPG	405682	768980	GardePro	10s	120	0.6	30	2024-06-24	11:13:40	2024-12-31	10:13:40	2024:06:26	2024-06-26	14:34:31	3.816	C027	Crossarchus platycephalus	6	-20	DF	1322.08	3769.26	Koto	3302.8	2024-06-26 14:34:31	2024-06-24 11:13:40	2024-12-31 10:13:40	1	83	0.333	33.028
C:\Users\user-1\Desktop\My_PHD\5_Redaction_These\Chap2_Metabarcoding & Census\Census\1_Data_Collection\Dossier4\C027\Crossarchus obscurus\DSCF0054.JPG	DSCF0054.JPG	405682	768980	GardePro	10s	120	0.6	30	2024-06-24	11:13:40	2024-12-31	10:13:40	2024:06:26	2024-06-26	14:34:32	3.816	C027	Crossarchus platycephalus	6	-20	DF	1322.08	3769.26	Koto	3302.8	2024-06-26 14:34:32	2024-06-24 11:13:40	2024-12-31 10:13:40	1	84	0.333	33.028
C:\Users\user-1\Desktop\My_PHD\5_Redaction_These\Chap2_Metabarcoding & Census\Census\1_Data_Collection\Dossier4\C027\Crossarchus obscurus\DSCF0055.JPG	DSCF0055.JPG	405682	768980	GardePro	10s	120	0.6	30	2024-06-24	11:13:40	2024-12-31	10:13:40	2024:06:26	2024-06-26	14:35:15	3.819	C027	Crossarchus platycephalus	6.5	0	DF	1322.08	3769.26	Koto	3302.8	2024-06-26 14:35:15	2024-06-24 11:13:40	2024-12-31 10:13:40	1	85	0.333	33.028
C:\Users\user-1\Desktop\My_PHD\5_Redaction_These\Chap2_Metabarcoding & Census\Census\1_Data_Collection\Dossier4\C027\Crossarchus obscurus\DSCF0056.JPG	DSCF0056.JPG	405682	768980	GardePro	10s	120	0.6	30	2024-06-24	11:13:40	2024-12-31	10:13:40	2024:06:26	2024-06-26	14:35:16	3.819	C027	Crossarchus platycephalus	6.5	-25	DF	1322.08	3769.26	Koto	3302.8	2024-06-26 14:35:16	2024-06-24 11:13:40	2024-12-31 10:13:40	1	86	0.333	33.028
C:\Users\user-1\Desktop\My_PHD\5_Redaction_These\Chap2_Metabarcoding & Census\Census\1_Data_Collection\Dossier4\C027\Crossarchus obscurus\DSCF0057.JPG	DSCF0057.JPG	405682	768980	GardePro	10s	120	0.6	30	2024-06-24	11:13:40	2024-12-31	10:13:40	2024:06:26	2024-06-26	14:47:19	3.872	C027	Crossarchus platycephalus	4	-45	DF	1322.08	3769.26	Koto	3302.8	2024-06-26 14:47:19	2024-06-24 11:13:40	2024-12-31 10:13:40	1	87	0.333	33.028
C:\Users\user-1\Desktop\My_PHD\5_Redaction_These\Chap2_Metabarcoding & Census\Census\1_Data_Collection\Dossier4\C027\Crossarchus obscurus\DSCF0058.JPG	DSCF0058.JPG	405682	768980	GardePro	10s	120	0.6	30	2024-06-24	11:13:40	2024-12-31	10:13:40	2024:06:26	2024-06-26	14:47:20	3.872	C027	Crossarchus platycephalus	4	-45	DF	1322.08	3769.26	Koto	3302.8	2024-06-26 14:47:20	2024-06-24 11:13:40	2024-12-31 10:13:40	1	88	0.333	33.028
C:\Users\user-1\Desktop\My_PHD\5_Redaction_These\Chap2_Metabarcoding & Census\Census\1_Data_Collection\Dossier4\C027\Genetta genetta\DSCF0015.JPG	DSCF0015.JPG	405682	768980	GardePro	10s	120	0.6	30	2024-06-24	11:13:40	2024-12-31	10:13:40	2024:06:26	2024-06-26	6:13:16	1.629	C027	Genetta pardina/maculata	5	0	DF	1322.08	3769.26	Koto	3302.8	2024-06-26 6:13:16	2024-06-24 11:13:40	2024-12-31 10:13:40	1	89	0.333	33.028
C:\Users\user-1\Desktop\My_PHD\5_Redaction_These\Chap2_Metabarcoding & Census\Census\1_Data_Collection\Dossier4\C027\Genetta genetta\DSCF0016.JPG	DSCF0016.JPG	405682	768980	GardePro	10s	120	0.6	30	2024-06-24	11:13:40	2024-12-31	10:13:40	2024:06:26	2024-06-26	6:13:16	1.629	C027	Genetta pardina/maculata	5	0	DF	1322.08	3769.26	Koto	3302.8	2024-06-26 6:13:16	2024-06-24 11:13:40	2024-12-31 10:13:40	1	90	0.333	33.028
C:\Users\user-1\Desktop\My_PHD\5_Redaction_These\Chap2_Metabarcoding & Census\Census\1_Data_Collection\Dossier4\C027\Genetta genetta\DSCF0017.JPG	DSCF0017.JPG	405682	768980	GardePro	10s	120	0.6	30	2024-06-24	11:13:40	2024-12-31	10:13:40	2024:06:26	2024-06-26	6:13:21	1.629	C027	Genetta pardina/maculata	5	-35	DF	1322.08	3769.26	Koto	3302.8	2024-06-26 6:13:21	2024-06-24 11:13:40	2024-12-31 10:13:40	1	91	0.333	33.028
C:\Users\user-1\Desktop\My_PHD\5_Redaction_These\Chap2_Metabarcoding & Census\Census\1_Data_Collection\Dossier4\C027\Genetta genetta\DSCF0018.JPG	DSCF0018.JPG	405682	768980	GardePro	10s	120	0.6	30	2024-06-24	11:13:40	2024-12-31	10:13:40	2024:06:26	2024-06-26	6:13:21	1.629	C027	Genetta pardina/maculata	5	-37	DF	1322.08	3769.26	Koto	3302.8	2024-06-26 6:13:21	2024-06-24 11:13:40	2024-12-31 10:13:40	1	92	0.333	33.028
C:\Users\user-1\Desktop\My_PHD\5_Redaction_These\Chap2_Metabarcoding & Census\Census\1_Data_Collection\Dossier4\C027\Genetta genetta\DSCF0019.JPG	DSCF0019.JPG	405682	768980	GardePro	10s	120	0.6	30	2024-06-24	11:13:40	2024-12-31	10:13:40	2024:06:26	2024-06-26	6:24:52	1.679	C027	Genetta pardina/maculata	5	-10	DF	1322.08	3769.26	Koto	3302.8	2024-06-26 6:24:52	2024-06-24 11:13:40	2024-12-31 10:13:40	1	93	0.333	33.028
C:\Users\user-1\Desktop\My_PHD\5_Redaction_These\Chap2_Metabarcoding & Census\Census\1_Data_Collection\Dossier4\C027\Genetta genetta\DSCF0020.JPG	DSCF0020.JPG	405682	768980	GardePro	10s	120	0.6	30	2024-06-24	11:13:40	2024-12-31	10:13:40	2024:06:26	2024-06-26	6:24:52	1.679	C027	Genetta pardina/maculata	5	-20	DF	1322.08	3769.26	Koto	3302.8	2024-06-26 6:24:52	2024-06-24 11:13:40	2024-12-31 10:13:40	1	94	0.333	33.028
C:\Users\user-1\Desktop\My_PHD\5_Redaction_These\Chap2_Metabarcoding & Census\Census\1_Data_Collection\Dossier4\C027\Genetta genetta\DSCF0021.JPG	DSCF0021.JPG	405682	768980	GardePro	10s	120	0.6	30	2024-06-24	11:13:40	2024-12-31	10:13:40	2024:06:26	2024-06-26	6:24:59	1.68	C027	Genetta pardina/maculata	5.5	-45	DF	1322.08	3769.26	Koto	3302.8	2024-06-26 6:24:59	2024-06-24 11:13:40	2024-12-31 10:13:40	1	95	0.333	33.028
C:\Users\user-1\Desktop\My_PHD\5_Redaction_These\Chap2_Metabarcoding & Census\Census\1_Data_Collection\Dossier4\C027\Genetta genetta\DSCF0022.JPG	DSCF0022.JPG	405682	768980	GardePro	10s	120	0.6	30	2024-06-24	11:13:40	2024-12-31	10:13:40	2024:06:26	2024-06-26	6:24:59	1.68	C027	Genetta pardina/maculata	5.5	-45	DF	1322.08	3769.26	Koto	3302.8	2024-06-26 6:24:59	2024-06-24 11:13:40	2024-12-31 10:13:40	1	96	0.333	33.028
C:\Users\user-1\Desktop\My_PHD\5_Redaction_These\Chap2_Metabarcoding & Census\Census\1_Data_Collection\Dossier4\C028\Cercopithecus mona\DSCF0007.JPG	DSCF0007.JPG	406711	768995	GardePro	10s	120	0.6	30	2024-06-24	10:00:08	2024-12-31	9:00:08	2024:06:26	2024-06-26	9:23:15	2.458	C028	Cercopithecus mona	0.5	60	DF	452.688	2838.4	Zalime	3302.8	2024-06-26 9:23:15	2024-06-24 10:00:08	2024-12-31 9:00:08	1	97	0.333	33.028
C:\Users\user-1\Desktop\My_PHD\5_Redaction_These\Chap2_Metabarcoding & Census\Census\1_Data_Collection\Dossier4\C028\Cercopithecus mona\DSCF0008.JPG	DSCF0008.JPG	406711	768995	GardePro	10s	120	0.6	30	2024-06-24	10:00:08	2024-12-31	9:00:08	2024:06:26	2024-06-26	9:23:15	2.458	C028	Cercopithecus mona	0.5	60	DF	452.688	2838.4	Zalime	3302.8	2024-06-26 9:23:15	2024-06-24 10:00:08	2024-12-31 9:00:08	1	98	0.333	33.028
C:\Users\user-1\Desktop\My_PHD\5_Redaction_These\Chap2_Metabarcoding & Census\Census\1_Data_Collection\Dossier4\C028\Cercopithecus mona\DSCF0009.JPG	DSCF0009.JPG	406711	768995	GardePro	10s	120	0.6	30	2024-06-24	10:00:08	2024-12-31	9:00:08	2024:06:26	2024-06-26	12:51:42	3.367	C028	Cercopithecus mona	7	40	DF	452.688	2838.4	Zalime	3302.8	2024-06-26 12:51:42	2024-06-24 10:00:08	2024-12-31 9:00:08	1	99	0.333	33.028
C:\Users\user-1\Desktop\My_PHD\5_Redaction_These\Chap2_Metabarcoding & Census\Census\1_Data_Collection\Dossier4\C028\Cercopithecus mona\DSCF0010.JPG	DSCF0010.JPG	406711	768995	GardePro	10s	120	0.6	30	2024-06-24	10:00:08	2024-12-31	9:00:08	2024:06:26	2024-06-26	12:51:42	3.367	C028	Cercopithecus mona	7	40	DF	452.688	2838.4	Zalime	3302.8	2024-06-26 12:51:42	2024-06-24 10:00:08	2024-12-31 9:00:08	1	100	0.333	33.028
C:\Users\user-1\Desktop\My_PHD\5_Redaction_These\Chap2_Metabarcoding & Census\Census\1_Data_Collection\Dossier4\C027\Crossarchus obscurus\DSCF0059.JPG	DSCF0059.JPG	405682	768980	GardePro	10s	120	0.6	30	2024-06-24	11:13:40	2024-12-31	10:13:40	2024:06:27	2024-06-27	14:05:58	3.691	C027	Crossarchus platycephalus	4	0	DF	1322.08	3769.26	Koto	3302.8	2024-06-27 14:05:58	2024-06-24 11:13:40	2024-12-31 10:13:40	1	101	0.333	33.028
C:\Users\user-1\Desktop\My_PHD\5_Redaction_These\Chap2_Metabarcoding & Census\Census\1_Data_Collection\Dossier4\C027\Crossarchus obscurus\DSCF0060.JPG	DSCF0060.JPG	405682	768980	GardePro	10s	120	0.6	30	2024-06-24	11:13:40	2024-12-31	10:13:40	2024:06:27	2024-06-27	14:05:58	3.691	C027	Crossarchus platycephalus	4	10	DF	1322.08	3769.26	Koto	3302.8	2024-06-27 14:05:58	2024-06-24 11:13:40	2024-12-31 10:13:40	1	102	0.333	33.028
C:\Users\user-1\Desktop\My_PHD\5_Redaction_These\Chap2_Metabarcoding & Census\Census\1_Data_Collection\Dossier4\C027\Crossarchus obscurus\DSCF0061.JPG	DSCF0061.JPG	405682	768980	GardePro	10s	120	0.6	30	2024-06-24	11:13:40	2024-12-31	10:13:40	2024:06:27	2024-06-27	14:06:02	3.692	C027	Crossarchus platycephalus	5	40	DF	1322.08	3769.26	Koto	3302.8	2024-06-27 14:06:02	2024-06-24 11:13:40	2024-12-31 10:13:40	1	103	0.333	33.028
C:\Users\user-1\Desktop\My_PHD\5_Redaction_These\Chap2_Metabarcoding & Census\Census\1_Data_Collection\Dossier4\C027\Crossarchus obscurus\DSCF0062.JPG	DSCF0062.JPG	405682	768980	GardePro	10s	120	0.6	30	2024-06-24	11:13:40	2024-12-31	10:13:40	2024:06:27	2024-06-27	14:06:03	3.692	C027	Crossarchus platycephalus	5	40	DF	1322.08	3769.26	Koto	3302.8	2024-06-27 14:06:03	2024-06-24 11:13:40	2024-12-31 10:13:40	1	104	0.333	33.028
C:\Users\user-1\Desktop\My_PHD\5_Redaction_These\Chap2_Metabarcoding & Census\Census\1_Data_Collection\Dossier4\C028\Cercopithecus mona\DSCF0011.JPG	DSCF0011.JPG	406711	768995	GardePro	10s	120	0.6	30	2024-06-24	10:00:08	2024-12-31	9:00:08	2024:06:27	2024-06-27	11:08:08	2.915	C028	Cercopithecus mona	7	25	DF	452.688	2838.4	Zalime	3302.8	2024-06-27 11:08:08	2024-06-24 10:00:08	2024-12-31 9:00:08	1	105	0.333	33.028
C:\Users\user-1\Desktop\My_PHD\5_Redaction_These\Chap2_Metabarcoding & Census\Census\1_Data_Collection\Dossier4\C028\Cercopithecus mona\DSCF0012.JPG	DSCF0012.JPG	406711	768995	GardePro	10s	120	0.6	30	2024-06-24	10:00:08	2024-12-31	9:00:08	2024:06:27	2024-06-27	11:08:08	2.915	C028	Cercopithecus mona	7	20	DF	452.688	2838.4	Zalime	3302.8	2024-06-27 11:08:08	2024-06-24 10:00:08	2024-12-31 9:00:08	1	106	0.333	33.028
C:\Users\user-1\Desktop\My_PHD\5_Redaction_These\Chap2_Metabarcoding & Census\Census\1_Data_Collection\Dossier2\C019\Tragelaphus scriptus\06270021.JPG	06270021.JPG	404700	767950	BUSHNEL	10s	35	0.6	33.5	2024-06-26	12:02:59	2024-12-31	11:02:59	2024:06:27	2024-06-27	12:39:59	3.31605	C019	Tragelaphus scriptus	5	-12	DF	1711.1	3936.84	Koto	3302.8	2024-06-27 12:39:59	2024-06-26 12:02:59	2024-12-31 11:02:59	1	107	0.097	33.028
C:\Users\user-1\Desktop\My_PHD\5_Redaction_These\Chap2_Metabarcoding & Census\Census\1_Data_Collection\Dossier2\C019\Tragelaphus scriptus\06270022.JPG	06270022.JPG	404700	767950	BUSHNEL	10s	35	0.6	33.5	2024-06-26	12:02:59	2024-12-31	11:02:59	2024:06:27	2024-06-27	12:40:00	3.31613	C019	Tragelaphus scriptus	5	-12	DF	1711.1	3936.84	Koto	3302.8	2024-06-27 12:40:00	2024-06-26 12:02:59	2024-12-31 11:02:59	1	108	0.097	33.028
C:\Users\user-1\Desktop\My_PHD\5_Redaction_These\Chap2_Metabarcoding & Census\Census\1_Data_Collection\Dossier2\C019\Tragelaphus scriptus\06270023.JPG	06270023.JPG	404700	767950	BUSHNEL	10s	35	0.6	33.5	2024-06-26	12:02:59	2024-12-31	11:02:59	2024:06:27	2024-06-27	12:40:11	3.31693	C019	Tragelaphus scriptus	5	12	DF	1711.1	3936.84	Koto	3302.8	2024-06-27 12:40:11	2024-06-26 12:02:59	2024-12-31 11:02:59	1	109	0.097	33.028
C:\Users\user-1\Desktop\My_PHD\5_Redaction_These\Chap2_Metabarcoding & Census\Census\1_Data_Collection\Dossier2\C019\Tragelaphus scriptus\06270024.JPG	06270024.JPG	404700	767950	BUSHNEL	10s	35	0.6	33.5	2024-06-26	12:02:59	2024-12-31	11:02:59	2024:06:27	2024-06-27	12:40:11	3.31693	C019	Tragelaphus scriptus	5	12	DF	1711.1	3936.84	Koto	3302.8	2024-06-27 12:40:11	2024-06-26 12:02:59	2024-12-31 11:02:59	1	110	0.097	33.028
C:\Users\user-1\Desktop\My_PHD\5_Redaction_These\Chap2_Metabarcoding & Census\Census\1_Data_Collection\Dossier3\C026\Genetta genetta\DSCF0013.JPG	DSCF0013.JPG	404727	768963	GardePro	10s	120	0.6	30	2024-06-24	12:34:07	2024-12-31	11:34:07	2024:06:28	2024-06-28	21:21:07	5.59	C026	Genetta pardina/maculata	4	5	DF	1463.17	3087.76	Koto	3302.8	2024-06-28 21:21:07	2024-06-24 12:34:07	2024-12-31 11:34:07	1	111	0.333	33.028
C:\Users\user-1\Desktop\My_PHD\5_Redaction_These\Chap2_Metabarcoding & Census\Census\1_Data_Collection\Dossier3\C026\Genetta genetta\DSCF0014.JPG	DSCF0014.JPG	404727	768963	GardePro	10s	120	0.6	30	2024-06-24	12:34:07	2024-12-31	11:34:07	2024:06:28	2024-06-28	21:21:07	5.59	C026	Genetta pardina/maculata	4	5	DF	1463.17	3087.76	Koto	3302.8	2024-06-28 21:21:07	2024-06-24 12:34:07	2024-12-31 11:34:07	1	112	0.333	33.028
C:\Users\user-1\Desktop\My_PHD\5_Redaction_These\Chap2_Metabarcoding & Census\Census\1_Data_Collection\Dossier3\C026\Genetta genetta\DSCF0015.JPG	DSCF0015.JPG	404727	768963	GardePro	10s	120	0.6	30	2024-06-24	12:34:07	2024-12-31	11:34:07	2024:06:28	2024-06-28	21:21:17	5.591	C026	Genetta pardina/maculata	4	10	DF	1463.17	3087.76	Koto	3302.8	2024-06-28 21:21:17	2024-06-24 12:34:07	2024-12-31 11:34:07	1	113	0.333	33.028
C:\Users\user-1\Desktop\My_PHD\5_Redaction_These\Chap2_Metabarcoding & Census\Census\1_Data_Collection\Dossier3\C026\Genetta genetta\DSCF0016.JPG	DSCF0016.JPG	404727	768963	GardePro	10s	120	0.6	30	2024-06-24	12:34:07	2024-12-31	11:34:07	2024:06:28	2024-06-28	21:21:17	5.591	C026	Genetta pardina/maculata	4	25	DF	1463.17	3087.76	Koto	3302.8	2024-06-28 21:21:17	2024-06-24 12:34:07	2024-12-31 11:34:07	1	114	0.333	33.028
C:\Users\user-1\Desktop\My_PHD\5_Redaction_These\Chap2_Metabarcoding & Census\Census\1_Data_Collection\Dossier3\C026\Tragelaphus scriptus\DSCF0003.JPG	DSCF0003.JPG	404727	768963	GardePro	10s	120	0.6	30	2024-06-24	12:34:07	2024-12-31	11:34:07	2024:06:28	2024-06-28	4:29:11	1.175	C026	Tragelaphus scriptus	4	-10	DF	1463.17	3087.76	Koto	3302.8	2024-06-28 4:29:11	2024-06-24 12:34:07	2024-12-31 11:34:07	1	115	0.333	33.028
C:\Users\user-1\Desktop\My_PHD\5_Redaction_These\Chap2_Metabarcoding & Census\Census\1_Data_Collection\Dossier3\C026\Tragelaphus scriptus\DSCF0004.JPG	DSCF0004.JPG	404727	768963	GardePro	10s	120	0.6	30	2024-06-24	12:34:07	2024-12-31	11:34:07	2024:06:28	2024-06-28	4:29:11	1.175	C026	Tragelaphus scriptus	4	-15	DF	1463.17	3087.76	Koto	3302.8	2024-06-28 4:29:11	2024-06-24 12:34:07	2024-12-31 11:34:07	1	116	0.333	33.028
C:\Users\user-1\Desktop\My_PHD\5_Redaction_These\Chap2_Metabarcoding & Census\Census\1_Data_Collection\Dossier3\C026\Tragelaphus scriptus\DSCF0005.JPG	DSCF0005.JPG	404727	768963	GardePro	10s	120	0.6	30	2024-06-24	12:34:07	2024-12-31	11:34:07	2024:06:28	2024-06-28	4:29:16	1.175	C026	Tragelaphus scriptus	4	-35	DF	1463.17	3087.76	Koto	3302.8	2024-06-28 4:29:16	2024-06-24 12:34:07	2024-12-31 11:34:07	1	117	0.333	33.028
C:\Users\user-1\Desktop\My_PHD\5_Redaction_These\Chap2_Metabarcoding & Census\Census\1_Data_Collection\Dossier3\C026\Tragelaphus scriptus\DSCF0006.JPG	DSCF0006.JPG	404727	768963	GardePro	10s	120	0.6	30	2024-06-24	12:34:07	2024-12-31	11:34:07	2024:06:28	2024-06-28	4:29:16	1.175	C026	Tragelaphus scriptus	4	-37	DF	1463.17	3087.76	Koto	3302.8	2024-06-28 4:29:16	2024-06-24 12:34:07	2024-12-31 11:34:07	1	118	0.333	33.028
C:\Users\user-1\Desktop\My_PHD\5_Redaction_These\Chap2_Metabarcoding & Census\Census\1_Data_Collection\Dossier3\C026\Tragelaphus scriptus\DSCF0007.JPG	DSCF0007.JPG	404727	768963	GardePro	10s	120	0.6	30	2024-06-24	12:34:07	2024-12-31	11:34:07	2024:06:28	2024-06-28	4:29:26	1.176	C026	Tragelaphus scriptus	4	-40	DF	1463.17	3087.76	Koto	3302.8	2024-06-28 4:29:26	2024-06-24 12:34:07	2024-12-31 11:34:07	1	119	0.333	33.028
C:\Users\user-1\Desktop\My_PHD\5_Redaction_These\Chap2_Metabarcoding & Census\Census\1_Data_Collection\Dossier3\C026\Tragelaphus scriptus\DSCF0008.JPG	DSCF0008.JPG	404727	768963	GardePro	10s	120	0.6	30	2024-06-24	12:34:07	2024-12-31	11:34:07	2024:06:28	2024-06-28	4:29:26	1.176	C026	Tragelaphus scriptus	4	-40	DF	1463.17	3087.76	Koto	3302.8	2024-06-28 4:29:26	2024-06-24 12:34:07	2024-12-31 11:34:07	1	120	0.333	33.028
C:\Users\user-1\Desktop\My_PHD\5_Redaction_These\Chap2_Metabarcoding & Census\Census\1_Data_Collection\Dossier3\C026\Tragelaphus scriptus\DSCF0009.JPG	DSCF0009.JPG	404727	768963	GardePro	10s	120	0.6	30	2024-06-24	12:34:07	2024-12-31	11:34:07	2024:06:28	2024-06-28	4:29:50	1.177	C026	Tragelaphus scriptus	4.5	-25	DF	1463.17	3087.76	Koto	3302.8	2024-06-28 4:29:50	2024-06-24 12:34:07	2024-12-31 11:34:07	1	121	0.333	33.028
C:\Users\user-1\Desktop\My_PHD\5_Redaction_These\Chap2_Metabarcoding & Census\Census\1_Data_Collection\Dossier3\C026\Tragelaphus scriptus\DSCF0010.JPG	DSCF0010.JPG	404727	768963	GardePro	10s	120	0.6	30	2024-06-24	12:34:07	2024-12-31	11:34:07	2024:06:28	2024-06-28	4:29:50	1.177	C026	Tragelaphus scriptus	4.5	-25	DF	1463.17	3087.76	Koto	3302.8	2024-06-28 4:29:50	2024-06-24 12:34:07	2024-12-31 11:34:07	1	122	0.333	33.028
C:\Users\user-1\Desktop\My_PHD\5_Redaction_These\Chap2_Metabarcoding & Census\Census\1_Data_Collection\Dossier3\C026\Tragelaphus scriptus\DSCF0011.JPG	DSCF0011.JPG	404727	768963	GardePro	10s	120	0.6	30	2024-06-24	12:34:07	2024-12-31	11:34:07	2024:06:28	2024-06-28	4:29:56	1.178	C026	Tragelaphus scriptus	4.5	10	DF	1463.17	3087.76	Koto	3302.8	2024-06-28 4:29:56	2024-06-24 12:34:07	2024-12-31 11:34:07	1	123	0.333	33.028
C:\Users\user-1\Desktop\My_PHD\5_Redaction_These\Chap2_Metabarcoding & Census\Census\1_Data_Collection\Dossier3\C026\Tragelaphus scriptus\DSCF0012.JPG	DSCF0012.JPG	404727	768963	GardePro	10s	120	0.6	30	2024-06-24	12:34:07	2024-12-31	11:34:07	2024:06:28	2024-06-28	4:29:56	1.178	C026	Tragelaphus scriptus	4.5	10	DF	1463.17	3087.76	Koto	3302.8	2024-06-28 4:29:56	2024-06-24 12:34:07	2024-12-31 11:34:07	1	124	0.333	33.028
C:\Users\user-1\Desktop\My_PHD\5_Redaction_These\Chap2_Metabarcoding & Census\Census\1_Data_Collection\Dossier4\C027\Genetta genetta\DSCF0063.JPG	DSCF0063.JPG	405682	768980	GardePro	10s	120	0.6	30	2024-06-24	11:13:40	2024-12-31	10:13:40	2024:06:28	2024-06-28	20:06:56	5.266	C027	Genetta pardina/maculata	7.5	0	DF	1322.08	3769.26	Koto	3302.8	2024-06-28 20:06:56	2024-06-24 11:13:40	2024-12-31 10:13:40	1	125	0.333	33.028
C:\Users\user-1\Desktop\My_PHD\5_Redaction_These\Chap2_Metabarcoding & Census\Census\1_Data_Collection\Dossier4\C027\Genetta genetta\DSCF0064.JPG	DSCF0064.JPG	405682	768980	GardePro	10s	120	0.6	30	2024-06-24	11:13:40	2024-12-31	10:13:40	2024:06:28	2024-06-28	20:06:56	5.266	C027	Genetta pardina/maculata	7.5	0	DF	1322.08	3769.26	Koto	3302.8	2024-06-28 20:06:56	2024-06-24 11:13:40	2024-12-31 10:13:40	1	126	0.333	33.028
C:\Users\user-1\Desktop\My_PHD\5_Redaction_These\Chap2_Metabarcoding & Census\Census\1_Data_Collection\Dossier4\C027\Genetta genetta\DSCF0065.JPG	DSCF0065.JPG	405682	768980	GardePro	10s	120	0.6	30	2024-06-24	11:13:40	2024-12-31	10:13:40	2024:06:28	2024-06-28	20:07:00	5.267	C027	Genetta pardina/maculata	7.5	15	DF	1322.08	3769.26	Koto	3302.8	2024-06-28 20:07:00	2024-06-24 11:13:40	2024-12-31 10:13:40	1	127	0.333	33.028
C:\Users\user-1\Desktop\My_PHD\5_Redaction_These\Chap2_Metabarcoding & Census\Census\1_Data_Collection\Dossier4\C027\Genetta genetta\DSCF0066.JPG	DSCF0066.JPG	405682	768980	GardePro	10s	120	0.6	30	2024-06-24	11:13:40	2024-12-31	10:13:40	2024:06:28	2024-06-28	20:07:00	5.267	C027	Genetta pardina/maculata	7.5	15	DF	1322.08	3769.26	Koto	3302.8	2024-06-28 20:07:00	2024-06-24 11:13:40	2024-12-31 10:13:40	1	128	0.333	33.028
C:\Users\user-1\Desktop\My_PHD\5_Redaction_These\Chap2_Metabarcoding & Census\Census\1_Data_Collection\Dossier4\C027\Genetta genetta\DSCF0066.JPG	DSCF0066.JPG	405682	768980	GardePro	10s	120	0.6	30	2024-06-24	11:13:40	2024-12-31	10:13:40	2024:06:28	2024-06-28	20:07:00	5.267	C027	Genetta pardina/maculata	7.5	15	DF	1322.08	3769.26	Koto	3302.8	2024-06-28 20:07:00	2024-06-24 11:13:40	2024-12-31 10:13:40	1	129	0.333	33.028
C:\Users\user-1\Desktop\My_PHD\5_Redaction_These\Chap2_Metabarcoding & Census\Census\1_Data_Collection\Dossier4\C027\Genetta genetta\DSCF0067.JPG	DSCF0067.JPG	405682	768980	GardePro	10s	120	0.6	30	2024-06-24	11:13:40	2024-12-31	10:13:40	2024:06:28	2024-06-28	20:07:05	5.267	C027	Genetta pardina/maculata	7.5	45	DF	1322.08	3769.26	Koto	3302.8	2024-06-28 20:07:05	2024-06-24 11:13:40	2024-12-31 10:13:40	1	130	0.333	33.028
C:\Users\user-1\Desktop\My_PHD\5_Redaction_These\Chap2_Metabarcoding & Census\Census\1_Data_Collection\Dossier4\C027\Genetta genetta\DSCF0068.JPG	DSCF0068.JPG	405682	768980	GardePro	10s	120	0.6	30	2024-06-24	11:13:40	2024-12-31	10:13:40	2024:06:28	2024-06-28	20:07:05	5.267	C027	Genetta pardina/maculata	7.5	45	DF	1322.08	3769.26	Koto	3302.8	2024-06-28 20:07:05	2024-06-24 11:13:40	2024-12-31 10:13:40	1	131	0.333	33.028
C:\Users\user-1\Desktop\My_PHD\5_Redaction_These\Chap2_Metabarcoding & Census\Census\1_Data_Collection\Dossier4\C028\Cercopithecus mona\DSCF0013.JPG	DSCF0013.JPG	406711	768995	GardePro	10s	120	0.6	30	2024-06-24	10:00:08	2024-12-31	9:00:08	2024:06:28	2024-06-28	10:00:39	2.621	C028	Cercopithecus mona	8	-45	DF	452.688	2838.4	Zalime	3302.8	2024-06-28 10:00:39	2024-06-24 10:00:08	2024-12-31 9:00:08	1	132	0.333	33.028
C:\Users\user-1\Desktop\My_PHD\5_Redaction_These\Chap2_Metabarcoding & Census\Census\1_Data_Collection\Dossier4\C028\Cercopithecus mona\DSCF0014.JPG	DSCF0014.JPG	406711	768995	GardePro	10s	120	0.6	30	2024-06-24	10:00:08	2024-12-31	9:00:08	2024:06:28	2024-06-28	10:00:39	2.621	C028	Cercopithecus mona	8	-45	DF	452.688	2838.4	Zalime	3302.8	2024-06-28 10:00:39	2024-06-24 10:00:08	2024-12-31 9:00:08	1	133	0.333	33.028
C:\Users\user-1\Desktop\My_PHD\5_Redaction_These\Chap2_Metabarcoding & Census\Census\1_Data_Collection\Dossier4\C028\Cercopithecus mona\DSCF0015.JPG	DSCF0015.JPG	406711	768995	GardePro	10s	120	0.6	30	2024-06-24	10:00:08	2024-12-31	9:00:08	2024:06:28	2024-06-28	10:00:53	2.622	C028	Cercopithecus mona	8	0	DF	452.688	2838.4	Zalime	3302.8	2024-06-28 10:00:53	2024-06-24 10:00:08	2024-12-31 9:00:08	1	134	0.333	33.028
C:\Users\user-1\Desktop\My_PHD\5_Redaction_These\Chap2_Metabarcoding & Census\Census\1_Data_Collection\Dossier4\C028\Cercopithecus mona\DSCF0016.JPG	DSCF0016.JPG	406711	768995	GardePro	10s	120	0.6	30	2024-06-24	10:00:08	2024-12-31	9:00:08	2024:06:28	2024-06-28	10:00:53	2.622	C028	Cercopithecus mona	8	10	DF	452.688	2838.4	Zalime	3302.8	2024-06-28 10:00:53	2024-06-24 10:00:08	2024-12-31 9:00:08	1	135	0.333	33.028
C:\Users\user-1\Desktop\My_PHD\5_Redaction_These\Chap2_Metabarcoding & Census\Census\1_Data_Collection\Dossier4\C028\Cercopithecus mona\DSCF0017.JPG	DSCF0017.JPG	406711	768995	GardePro	10s	120	0.6	30	2024-06-24	10:00:08	2024-12-31	9:00:08	2024:06:28	2024-06-28	10:02:22	2.628	C028	Cercopithecus mona	10	40	DF	452.688	2838.4	Zalime	3302.8	2024-06-28 10:02:22	2024-06-24 10:00:08	2024-12-31 9:00:08	1	136	0.333	33.028
C:\Users\user-1\Desktop\My_PHD\5_Redaction_These\Chap2_Metabarcoding & Census\Census\1_Data_Collection\Dossier4\C028\Cercopithecus mona\DSCF0018.JPG	DSCF0018.JPG	406711	768995	GardePro	10s	120	0.6	30	2024-06-24	10:00:08	2024-12-31	9:00:08	2024:06:28	2024-06-28	10:02:22	2.628	C028	Cercopithecus mona	10	40	DF	452.688	2838.4	Zalime	3302.8	2024-06-28 10:02:22	2024-06-24 10:00:08	2024-12-31 9:00:08	1	137	0.333	33.028
C:\Users\user-1\Desktop\My_PHD\5_Redaction_These\Chap2_Metabarcoding & Census\Census\1_Data_Collection\Dossier5\C035\Thryonomys swinderianus\06280003.JPG	06280003.JPG	405710	769960	BUSHNEL	10s	35	0.6	33.5	2024-06-27	10:59:48	2024-12-31	9:59:48	2024:06:28	2024-06-28	5:48:36	1.521	C035	Atherurus africanus	4	11	DF	604.665	3200.45	Koto	3302.8	2024-06-28 5:48:36	2024-06-27 10:59:48	2024-12-31 9:59:48	1	138	0.097	33.028
C:\Users\user-1\Desktop\My_PHD\5_Redaction_These\Chap2_Metabarcoding & Census\Census\1_Data_Collection\Dossier5\C035\Thryonomys swinderianus\06280004.JPG	06280004.JPG	405710	769960	BUSHNEL	10s	35	0.6	33.5	2024-06-27	10:59:48	2024-12-31	9:59:48	2024:06:28	2024-06-28	5:48:36	1.521	C035	Atherurus africanus	4	9	DF	604.665	3200.45	Koto	3302.8	2024-06-28 5:48:36	2024-06-27 10:59:48	2024-12-31 9:59:48	1	139	0.097	33.028
C:\Users\user-1\Desktop\My_PHD\5_Redaction_These\Chap2_Metabarcoding & Census\Census\1_Data_Collection\Dossier5\C035\Thryonomys swinderianus\06280005.JPG	06280005.JPG	405710	769960	BUSHNEL	10s	35	0.6	33.5	2024-06-27	10:59:48	2024-12-31	9:59:48	2024:06:28	2024-06-28	5:48:48	1.522	C035	Atherurus africanus	2.5	-12	DF	604.665	3200.45	Koto	3302.8	2024-06-28 5:48:48	2024-06-27 10:59:48	2024-12-31 9:59:48	1	140	0.097	33.028
C:\Users\user-1\Desktop\My_PHD\5_Redaction_These\Chap2_Metabarcoding & Census\Census\1_Data_Collection\Dossier5\C035\Thryonomys swinderianus\06280006.JPG	06280006.JPG	405710	769960	BUSHNEL	10s	35	0.6	33.5	2024-06-27	10:59:48	2024-12-31	9:59:48	2024:06:28	2024-06-28	5:48:48	1.522	C035	Atherurus africanus	2	-13	DF	604.665	3200.45	Koto	3302.8	2024-06-28 5:48:48	2024-06-27 10:59:48	2024-12-31 9:59:48	1	141	0.097	33.028
C:\Users\user-1\Desktop\My_PHD\5_Redaction_These\Chap2_Metabarcoding & Census\Census\1_Data_Collection\Dossier3\C026\Genetta genetta\DSCF0017.JPG	DSCF0017.JPG	404727	768963	GardePro	10s	120	0.6	30	2024-06-24	12:34:07	2024-12-31	11:34:07	2024:06:29	2024-06-29	4:48:44	1.26	C026	Genetta pardina/maculata	4	25	DF	1463.17	3087.76	Koto	3302.8	2024-06-29 4:48:44	2024-06-24 12:34:07	2024-12-31 11:34:07	1	142	0.333	33.028
C:\Users\user-1\Desktop\My_PHD\5_Redaction_These\Chap2_Metabarcoding & Census\Census\1_Data_Collection\Dossier3\C026\Genetta genetta\DSCF0018.JPG	DSCF0018.JPG	404727	768963	GardePro	10s	120	0.6	30	2024-06-24	12:34:07	2024-12-31	11:34:07	2024:06:29	2024-06-29	4:48:44	1.26	C026	Genetta pardina/maculata	4	25	DF	1463.17	3087.76	Koto	3302.8	2024-06-29 4:48:44	2024-06-24 12:34:07	2024-12-31 11:34:07	1	143	0.333	33.028
C:\Users\user-1\Desktop\My_PHD\5_Redaction_These\Chap2_Metabarcoding & Census\Census\1_Data_Collection\Dossier4\C027\Xerus erythropus\DSCF0069.JPG	DSCF0069.JPG	405682	768980	GardePro	10s	120	0.6	30	2024-06-24	11:13:40	2024-12-31	10:13:40	2024:06:29	2024-06-29	7:09:21	1.873	C027	Xerus erythropus	6	-30	DF	1322.08	3769.26	Koto	3302.8	2024-06-29 7:09:21	2024-06-24 11:13:40	2024-12-31 10:13:40	1	144	0.333	33.028
C:\Users\user-1\Desktop\My_PHD\5_Redaction_These\Chap2_Metabarcoding & Census\Census\1_Data_Collection\Dossier4\C027\Xerus erythropus\DSCF0070.JPG	DSCF0070.JPG	405682	768980	GardePro	10s	120	0.6	30	2024-06-24	11:13:40	2024-12-31	10:13:40	2024:06:29	2024-06-29	7:09:21	1.873	C027	Xerus erythropus	6.5	-30	DF	1322.08	3769.26	Koto	3302.8	2024-06-29 7:09:21	2024-06-24 11:13:40	2024-12-31 10:13:40	1	145	0.333	33.028
C:\Users\user-1\Desktop\My_PHD\5_Redaction_These\Chap2_Metabarcoding & Census\Census\1_Data_Collection\Dossier4\C027\Xerus erythropus\DSCF0071.JPG	DSCF0071.JPG	405682	768980	GardePro	10s	120	0.6	30	2024-06-24	11:13:40	2024-12-31	10:13:40	2024:06:29	2024-06-29	7:09:25	1.874	C027	Xerus erythropus	6.5	0	DF	1322.08	3769.26	Koto	3302.8	2024-06-29 7:09:25	2024-06-24 11:13:40	2024-12-31 10:13:40	1	146	0.333	33.028
C:\Users\user-1\Desktop\My_PHD\5_Redaction_These\Chap2_Metabarcoding & Census\Census\1_Data_Collection\Dossier4\C027\Xerus erythropus\DSCF0072.JPG	DSCF0072.JPG	405682	768980	GardePro	10s	120	0.6	30	2024-06-24	11:13:40	2024-12-31	10:13:40	2024:06:29	2024-06-29	7:09:26	1.874	C027	Xerus erythropus	6.5	0	DF	1322.08	3769.26	Koto	3302.8	2024-06-29 7:09:26	2024-06-24 11:13:40	2024-12-31 10:13:40	1	147	0.333	33.028
C:\Users\user-1\Desktop\My_PHD\5_Redaction_These\Chap2_Metabarcoding & Census\Census\1_Data_Collection\Dossier4\C028\Cercopithecus mona\DSCF0019.JPG	DSCF0019.JPG	406711	768995	GardePro	10s	120	0.6	30	2024-06-24	10:00:08	2024-12-31	9:00:08	2024:06:29	2024-06-29	9:38:37	2.525	C028	Cercopithecus mona	8	-10	DF	452.688	2838.4	Zalime	3302.8	2024-06-29 9:38:37	2024-06-24 10:00:08	2024-12-31 9:00:08	1	148	0.333	33.028
C:\Users\user-1\Desktop\My_PHD\5_Redaction_These\Chap2_Metabarcoding & Census\Census\1_Data_Collection\Dossier4\C028\Cercopithecus mona\DSCF0020.JPG	DSCF0020.JPG	406711	768995	GardePro	10s	120	0.6	30	2024-06-24	10:00:08	2024-12-31	9:00:08	2024:06:29	2024-06-29	9:38:37	2.525	C028	Cercopithecus mona	9	30	DF	452.688	2838.4	Zalime	3302.8	2024-06-29 9:38:37	2024-06-24 10:00:08	2024-12-31 9:00:08	1	149	0.333	33.028
C:\Users\user-1\Desktop\My_PHD\5_Redaction_These\Chap2_Metabarcoding & Census\Census\1_Data_Collection\Dossier4\C028\Cercopithecus mona\DSCF0021.JPG	DSCF0021.JPG	406711	768995	GardePro	10s	120	0.6	30	2024-06-24	10:00:08	2024-12-31	9:00:08	2024:06:29	2024-06-29	9:38:55	2.526	C028	Cercopithecus mona	10	40	DF	452.688	2838.4	Zalime	3302.8	2024-06-29 9:38:55	2024-06-24 10:00:08	2024-12-31 9:00:08	1	150	0.333	33.028
C:\Users\user-1\Desktop\My_PHD\5_Redaction_These\Chap2_Metabarcoding & Census\Census\1_Data_Collection\Dossier4\C028\Cercopithecus mona\DSCF0022.JPG	DSCF0022.JPG	406711	768995	GardePro	10s	120	0.6	30	2024-06-24	10:00:08	2024-12-31	9:00:08	2024:06:29	2024-06-29	9:38:55	2.526	C028	Cercopithecus mona	10	40	DF	452.688	2838.4	Zalime	3302.8	2024-06-29 9:38:55	2024-06-24 10:00:08	2024-12-31 9:00:08	1	151	0.333	33.028
C:\Users\user-1\Desktop\My_PHD\5_Redaction_These\Chap2_Metabarcoding & Census\Census\1_Data_Collection\Dossier5\C033\Crossarchus obscurus\DSCF0007.JPG	DSCF0007.JPG	403721	769978	GardePro	10s	120	0.6	30	2024-06-27	13:20:57	2024-12-31	12:20:57	2024:06:29	2024-06-29	12:30:57	3.277	C033	Crossarchus platycephalus	2.5	-30	DF	394.703	1701.99	Koto	3302.8	2024-06-29 12:30:57	2024-06-27 13:20:57	2024-12-31 12:20:57	1	152	0.333	33.028
C:\Users\user-1\Desktop\My_PHD\5_Redaction_These\Chap2_Metabarcoding & Census\Census\1_Data_Collection\Dossier5\C033\Crossarchus obscurus\DSCF0008.JPG	DSCF0008.JPG	403721	769978	GardePro	10s	120	0.6	30	2024-06-27	13:20:57	2024-12-31	12:20:57	2024:06:29	2024-06-29	12:30:57	3.277	C033	Crossarchus platycephalus	2	-40	DF	394.703	1701.99	Koto	3302.8	2024-06-29 12:30:57	2024-06-27 13:20:57	2024-12-31 12:20:57	1	153	0.333	33.028
C:\Users\user-1\Desktop\My_PHD\5_Redaction_These\Chap2_Metabarcoding & Census\Census\1_Data_Collection\Dossier5\C033\Crossarchus obscurus\DSCF0009.JPG	DSCF0009.JPG	403721	769978	GardePro	10s	120	0.6	30	2024-06-27	13:20:57	2024-12-31	12:20:57	2024:06:29	2024-06-29	12:32:04	3.282	C033	Crossarchus platycephalus	2.5	35	DF	394.703	1701.99	Koto	3302.8	2024-06-29 12:32:04	2024-06-27 13:20:57	2024-12-31 12:20:57	1	154	0.333	33.028
C:\Users\user-1\Desktop\My_PHD\5_Redaction_These\Chap2_Metabarcoding & Census\Census\1_Data_Collection\Dossier5\C033\Crossarchus obscurus\DSCF0010.JPG	DSCF0010.JPG	403721	769978	GardePro	10s	120	0.6	30	2024-06-27	13:20:57	2024-12-31	12:20:57	2024:06:29	2024-06-29	12:32:04	3.282	C033	Crossarchus platycephalus	2	30	DF	394.703	1701.99	Koto	3302.8	2024-06-29 12:32:04	2024-06-27 13:20:57	2024-12-31 12:20:57	1	155	0.333	33.028
C:\Users\user-1\Desktop\My_PHD\5_Redaction_These\Chap2_Metabarcoding & Census\Census\1_Data_Collection\Dossier5\C035\Crossarchus obscurus\06290015.JPG	06290015.JPG	405710	769960	BUSHNEL	10s	35	0.6	33.5	2024-06-27	10:59:48	2024-12-31	9:59:48	2024:06:29	2024-06-29	17:24:52	4.559	C035	Crossarchus platycephalus	3.5	11	DF	604.665	3200.45	Koto	3302.8	2024-06-29 17:24:52	2024-06-27 10:59:48	2024-12-31 9:59:48	1	156	0.097	33.028
C:\Users\user-1\Desktop\My_PHD\5_Redaction_These\Chap2_Metabarcoding & Census\Census\1_Data_Collection\Dossier5\C035\Crossarchus obscurus\06290016.JPG	06290016.JPG	405710	769960	BUSHNEL	10s	35	0.6	33.5	2024-06-27	10:59:48	2024-12-31	9:59:48	2024:06:29	2024-06-29	17:24:53	4.559	C035	Crossarchus platycephalus	3.5	11	DF	604.665	3200.45	Koto	3302.8	2024-06-29 17:24:53	2024-06-27 10:59:48	2024-12-31 9:59:48	1	157	0.097	33.028
C:\Users\user-1\Desktop\My_PHD\5_Redaction_These\Chap2_Metabarcoding & Census\Census\1_Data_Collection\Dossier5\C035\Ratus sp\06290007.JPG	06290007.JPG	405710	769960	BUSHNEL	10s	35	0.6	33.5	2024-06-27	10:59:48	2024-12-31	9:59:48	2024:06:29	2024-06-29	2:54:47	0.763	C035	Praomys sp.	3.5	-12	DF	604.665	3200.45	Koto	3302.8	2024-06-29 2:54:47	2024-06-27 10:59:48	2024-12-31 9:59:48	1	158	0.097	33.028
C:\Users\user-1\Desktop\My_PHD\5_Redaction_These\Chap2_Metabarcoding & Census\Census\1_Data_Collection\Dossier5\C035\Ratus sp\06290008.JPG	06290008.JPG	405710	769960	BUSHNEL	10s	35	0.6	33.5	2024-06-27	10:59:48	2024-12-31	9:59:48	2024:06:29	2024-06-29	2:54:47	0.763	C035	Praomys sp.	3.5	-12	DF	604.665	3200.45	Koto	3302.8	2024-06-29 2:54:47	2024-06-27 10:59:48	2024-12-31 9:59:48	1	159	0.097	33.028
C:\Users\user-1\Desktop\My_PHD\5_Redaction_These\Chap2_Metabarcoding & Census\Census\1_Data_Collection\Dossier5\C035\Ratus sp\06290009.JPG	06290009.JPG	405710	769960	BUSHNEL	10s	35	0.6	33.5	2024-06-27	10:59:48	2024-12-31	9:59:48	2024:06:29	2024-06-29	2:54:57	0.763	C035	Praomys sp.	3.5	-7	DF	604.665	3200.45	Koto	3302.8	2024-06-29 2:54:57	2024-06-27 10:59:48	2024-12-31 9:59:48	1	160	0.097	33.028
C:\Users\user-1\Desktop\My_PHD\5_Redaction_These\Chap2_Metabarcoding & Census\Census\1_Data_Collection\Dossier5\C035\Ratus sp\06290010.JPG	06290010.JPG	405710	769960	BUSHNEL	10s	35	0.6	33.5	2024-06-27	10:59:48	2024-12-31	9:59:48	2024:06:29	2024-06-29	2:54:57	0.763	C035	Praomys sp.	3.5	-7	DF	604.665	3200.45	Koto	3302.8	2024-06-29 2:54:57	2024-06-27 10:59:48	2024-12-31 9:59:48	1	161	0.097	33.028
C:\Users\user-1\Desktop\My_PHD\5_Redaction_These\Chap2_Metabarcoding & Census\Census\1_Data_Collection\Dossier5\C035\Thryonomys swinderianus\06290011.JPG	06290011.JPG	405710	769960	BUSHNEL	10s	35	0.6	33.5	2024-06-27	10:59:48	2024-12-31	9:59:48	2024:06:29	2024-06-29	3:06:08	0.812	C035	Atherurus africanus	4	11	DF	604.665	3200.45	Koto	3302.8	2024-06-29 3:06:08	2024-06-27 10:59:48	2024-12-31 9:59:48	1	162	0.097	33.028
C:\Users\user-1\Desktop\My_PHD\5_Redaction_These\Chap2_Metabarcoding & Census\Census\1_Data_Collection\Dossier5\C035\Thryonomys swinderianus\06290012.JPG	06290012.JPG	405710	769960	BUSHNEL	10s	35	0.6	33.5	2024-06-27	10:59:48	2024-12-31	9:59:48	2024:06:29	2024-06-29	3:06:08	0.812	C035	Atherurus africanus	4	9	DF	604.665	3200.45	Koto	3302.8	2024-06-29 3:06:08	2024-06-27 10:59:48	2024-12-31 9:59:48	1	163	0.097	33.028
C:\Users\user-1\Desktop\My_PHD\5_Redaction_These\Chap2_Metabarcoding & Census\Census\1_Data_Collection\Dossier5\C035\Thryonomys swinderianus\06290013.JPG	06290013.JPG	405710	769960	BUSHNEL	10s	35	0.6	33.5	2024-06-27	10:59:48	2024-12-31	9:59:48	2024:06:29	2024-06-29	3:06:20	0.813	C035	Atherurus africanus	3	-3	DF	604.665	3200.45	Koto	3302.8	2024-06-29 3:06:20	2024-06-27 10:59:48	2024-12-31 9:59:48	1	164	0.097	33.028
C:\Users\user-1\Desktop\My_PHD\5_Redaction_These\Chap2_Metabarcoding & Census\Census\1_Data_Collection\Dossier5\C035\Thryonomys swinderianus\06290014.JPG	06290014.JPG	405710	769960	BUSHNEL	10s	35	0.6	33.5	2024-06-27	10:59:48	2024-12-31	9:59:48	2024:06:29	2024-06-29	3:06:21	0.813	C035	Atherurus africanus	3	-3	DF	604.665	3200.45	Koto	3302.8	2024-06-29 3:06:21	2024-06-27 10:59:48	2024-12-31 9:59:48	1	165	0.097	33.028
C:\Users\user-1\Desktop\My_PHD\5_Redaction_These\Chap2_Metabarcoding & Census\Census\1_Data_Collection\Dossier2\C016\Crossarchus obscurus\DSCF0003.JPG	DSCF0003.JPG	401717	767985	GardePro	10s	120	0.6	30	2024-06-26	16:23:40	2024-12-31	15:23:40	2024:06:30	2024-06-30	7:30:40	1.966	C016	Crossarchus platycephalus	3.5	40	DF	1338.45	3671.46	Koto	3302.8	2024-06-30 7:30:40	2024-06-26 16:23:40	2024-12-31 15:23:40	1	166	0.333	33.028
C:\Users\user-1\Desktop\My_PHD\5_Redaction_These\Chap2_Metabarcoding & Census\Census\1_Data_Collection\Dossier2\C016\Crossarchus obscurus\DSCF0004.JPG	DSCF0004.JPG	401717	767985	GardePro	10s	120	0.6	30	2024-06-26	16:23:40	2024-12-31	15:23:40	2024:06:30	2024-06-30	7:30:40	1.966	C016	Crossarchus platycephalus	3.5	40	DF	1338.45	3671.46	Koto	3302.8	2024-06-30 7:30:40	2024-06-26 16:23:40	2024-12-31 15:23:40	1	167	0.333	33.028
C:\Users\user-1\Desktop\My_PHD\5_Redaction_These\Chap2_Metabarcoding & Census\Census\1_Data_Collection\Dossier3\C025\Tragelaphus scriptus\DSCF0007.JPG	DSCF0007.JPG	403704	768964	GardePro	10s	120	0.6	30	2024-06-24	14:20:16	2024-12-31	13:20:16	2024:06:30	2024-06-30	9:10:16	2.401	C025	Tragelaphus scriptus	1	-40	DF	1389.14	2619.4	Koto	3302.8	2024-06-30 9:10:16	2024-06-24 14:20:16	2024-12-31 13:20:16	1	168	0.333	33.028
C:\Users\user-1\Desktop\My_PHD\5_Redaction_These\Chap2_Metabarcoding & Census\Census\1_Data_Collection\Dossier3\C025\Tragelaphus scriptus\DSCF0008.JPG	DSCF0008.JPG	403704	768964	GardePro	10s	120	0.6	30	2024-06-24	14:20:16	2024-12-31	13:20:16	2024:06:30	2024-06-30	9:10:16	2.401	C025	Tragelaphus scriptus	1	-40	DF	1389.14	2619.4	Koto	3302.8	2024-06-30 9:10:16	2024-06-24 14:20:16	2024-12-31 13:20:16	1	169	0.333	33.028
C:\Users\user-1\Desktop\My_PHD\5_Redaction_These\Chap2_Metabarcoding & Census\Census\1_Data_Collection\Dossier3\C025\Tragelaphus scriptus\DSCF0009.JPG	DSCF0009.JPG	403704	768964	GardePro	10s	120	0.6	30	2024-06-24	14:20:16	2024-12-31	13:20:16	2024:06:30	2024-06-30	9:10:24	2.402	C025	Tragelaphus scriptus	1	-40	DF	1389.14	2619.4	Koto	3302.8	2024-06-30 9:10:24	2024-06-24 14:20:16	2024-12-31 13:20:16	1	170	0.333	33.028
C:\Users\user-1\Desktop\My_PHD\5_Redaction_These\Chap2_Metabarcoding & Census\Census\1_Data_Collection\Dossier3\C025\Tragelaphus scriptus\DSCF0010.JPG	DSCF0010.JPG	403704	768964	GardePro	10s	120	0.6	30	2024-06-24	14:20:16	2024-12-31	13:20:16	2024:06:30	2024-06-30	9:10:25	2.402	C025	Tragelaphus scriptus	1	-40	DF	1389.14	2619.4	Koto	3302.8	2024-06-30 9:10:25	2024-06-24 14:20:16	2024-12-31 13:20:16	1	171	0.333	33.028
C:\Users\user-1\Desktop\My_PHD\5_Redaction_These\Chap2_Metabarcoding & Census\Census\1_Data_Collection\Dossier3\C025\Tragelaphus scriptus\DSCF0011.JPG	DSCF0011.JPG	403704	768964	GardePro	10s	120	0.6	30	2024-06-24	14:20:16	2024-12-31	13:20:16	2024:06:30	2024-06-30	9:10:32	2.402	C025	Tragelaphus scriptus	1	-40	DF	1389.14	2619.4	Koto	3302.8	2024-06-30 9:10:32	2024-06-24 14:20:16	2024-12-31 13:20:16	1	172	0.333	33.028
C:\Users\user-1\Desktop\My_PHD\5_Redaction_These\Chap2_Metabarcoding & Census\Census\1_Data_Collection\Dossier3\C025\Tragelaphus scriptus\DSCF0012.JPG	DSCF0012.JPG	403704	768964	GardePro	10s	120	0.6	30	2024-06-24	14:20:16	2024-12-31	13:20:16	2024:06:30	2024-06-30	9:10:33	2.402	C025	Tragelaphus scriptus	1	-40	DF	1389.14	2619.4	Koto	3302.8	2024-06-30 9:10:33	2024-06-24 14:20:16	2024-12-31 13:20:16	1	173	0.333	33.028
C:\Users\user-1\Desktop\My_PHD\5_Redaction_These\Chap2_Metabarcoding & Census\Census\1_Data_Collection\Dossier3\C025\Tragelaphus scriptus\DSCF0013.JPG	DSCF0013.JPG	403704	768964	GardePro	10s	120	0.6	30	2024-06-24	14:20:16	2024-12-31	13:20:16	2024:06:30	2024-06-30	9:10:37	2.403	C025	Tragelaphus scriptus	1	-40	DF	1389.14	2619.4	Koto	3302.8	2024-06-30 9:10:37	2024-06-24 14:20:16	2024-12-31 13:20:16	1	174	0.333	33.028
C:\Users\user-1\Desktop\My_PHD\5_Redaction_These\Chap2_Metabarcoding & Census\Census\1_Data_Collection\Dossier3\C025\Tragelaphus scriptus\DSCF0014.JPG	DSCF0014.JPG	403704	768964	GardePro	10s	120	0.6	30	2024-06-24	14:20:16	2024-12-31	13:20:16	2024:06:30	2024-06-30	9:10:38	2.403	C025	Tragelaphus scriptus	1	-40	DF	1389.14	2619.4	Koto	3302.8	2024-06-30 9:10:38	2024-06-24 14:20:16	2024-12-31 13:20:16	1	175	0.333	33.028
C:\Users\user-1\Desktop\My_PHD\5_Redaction_These\Chap2_Metabarcoding & Census\Census\1_Data_Collection\Dossier3\C025\Tragelaphus scriptus\DSCF0015.JPG	DSCF0015.JPG	403704	768964	GardePro	10s	120	0.6	30	2024-06-24	14:20:16	2024-12-31	13:20:16	2024:06:30	2024-06-30	9:10:42	2.403	C025	Tragelaphus scriptus	4	-30	DF	1389.14	2619.4	Koto	3302.8	2024-06-30 9:10:42	2024-06-24 14:20:16	2024-12-31 13:20:16	1	176	0.333	33.028
C:\Users\user-1\Desktop\My_PHD\5_Redaction_These\Chap2_Metabarcoding & Census\Census\1_Data_Collection\Dossier3\C025\Tragelaphus scriptus\DSCF0016.JPG	DSCF0016.JPG	403704	768964	GardePro	10s	120	0.6	30	2024-06-24	14:20:16	2024-12-31	13:20:16	2024:06:30	2024-06-30	9:10:43	2.403	C025	Tragelaphus scriptus	4	-30	DF	1389.14	2619.4	Koto	3302.8	2024-06-30 9:10:43	2024-06-24 14:20:16	2024-12-31 13:20:16	1	177	0.333	33.028
C:\Users\user-1\Desktop\My_PHD\5_Redaction_These\Chap2_Metabarcoding & Census\Census\1_Data_Collection\Dossier3\C025\Tragelaphus scriptus\DSCF0017.JPG	DSCF0017.JPG	403704	768964	GardePro	10s	120	0.6	30	2024-06-24	14:20:16	2024-12-31	13:20:16	2024:06:30	2024-06-30	9:10:49	2.403	C025	Tragelaphus scriptus	5	-30	DF	1389.14	2619.4	Koto	3302.8	2024-06-30 9:10:49	2024-06-24 14:20:16	2024-12-31 13:20:16	1	178	0.333	33.028
C:\Users\user-1\Desktop\My_PHD\5_Redaction_These\Chap2_Metabarcoding & Census\Census\1_Data_Collection\Dossier3\C025\Tragelaphus scriptus\DSCF0018.JPG	DSCF0018.JPG	403704	768964	GardePro	10s	120	0.6	30	2024-06-24	14:20:16	2024-12-31	13:20:16	2024:06:30	2024-06-30	9:10:50	2.403	C025	Tragelaphus scriptus	5	-30	DF	1389.14	2619.4	Koto	3302.8	2024-06-30 9:10:50	2024-06-24 14:20:16	2024-12-31 13:20:16	1	179	0.333	33.028
C:\Users\user-1\Desktop\My_PHD\5_Redaction_These\Chap2_Metabarcoding & Census\Census\1_Data_Collection\Dossier3\C025\Tragelaphus scriptus\DSCF0019.JPG	DSCF0019.JPG	403704	768964	GardePro	10s	120	0.6	30	2024-06-24	14:20:16	2024-12-31	13:20:16	2024:06:30	2024-06-30	9:11:22	2.406	C025	Tragelaphus scriptus	5	-30	DF	1389.14	2619.4	Koto	3302.8	2024-06-30 9:11:22	2024-06-24 14:20:16	2024-12-31 13:20:16	1	180	0.333	33.028
C:\Users\user-1\Desktop\My_PHD\5_Redaction_These\Chap2_Metabarcoding & Census\Census\1_Data_Collection\Dossier3\C025\Tragelaphus scriptus\DSCF0020.JPG	DSCF0020.JPG	403704	768964	GardePro	10s	120	0.6	30	2024-06-24	14:20:16	2024-12-31	13:20:16	2024:06:30	2024-06-30	9:11:23	2.406	C025	Tragelaphus scriptus	5	-30	DF	1389.14	2619.4	Koto	3302.8	2024-06-30 9:11:23	2024-06-24 14:20:16	2024-12-31 13:20:16	1	181	0.333	33.028
C:\Users\user-1\Desktop\My_PHD\5_Redaction_These\Chap2_Metabarcoding & Census\Census\1_Data_Collection\Dossier3\C025\Tragelaphus scriptus\DSCF0021.JPG	DSCF0021.JPG	403704	768964	GardePro	10s	120	0.6	30	2024-06-24	14:20:16	2024-12-31	13:20:16	2024:06:30	2024-06-30	9:11:32	2.407	C025	Tragelaphus scriptus	6	-35	DF	1389.14	2619.4	Koto	3302.8	2024-06-30 9:11:32	2024-06-24 14:20:16	2024-12-31 13:20:16	1	182	0.333	33.028
C:\Users\user-1\Desktop\My_PHD\5_Redaction_These\Chap2_Metabarcoding & Census\Census\1_Data_Collection\Dossier3\C025\Tragelaphus scriptus\DSCF0022.JPG	DSCF0022.JPG	403704	768964	GardePro	10s	120	0.6	30	2024-06-24	14:20:16	2024-12-31	13:20:16	2024:06:30	2024-06-30	9:11:33	2.407	C025	Tragelaphus scriptus	6	-35	DF	1389.14	2619.4	Koto	3302.8	2024-06-30 9:11:33	2024-06-24 14:20:16	2024-12-31 13:20:16	1	183	0.333	33.028
C:\Users\user-1\Desktop\My_PHD\5_Redaction_These\Chap2_Metabarcoding & Census\Census\1_Data_Collection\Dossier4\C027\Thryonomys swinderianus\DSCF0073.JPG	DSCF0073.JPG	405682	768980	GardePro	10s	120	0.6	30	2024-06-24	11:13:40	2024-12-31	10:13:40	2024:06:30	2024-06-30	21:50:18	5.717	C027	Atherurus africanus	7.5	-30	DF	1322.08	3769.26	Koto	3302.8	2024-06-30 21:50:18	2024-06-24 11:13:40	2024-12-31 10:13:40	1	184	0.333	33.028
C:\Users\user-1\Desktop\My_PHD\5_Redaction_These\Chap2_Metabarcoding & Census\Census\1_Data_Collection\Dossier4\C027\Thryonomys swinderianus\DSCF0074.JPG	DSCF0074.JPG	405682	768980	GardePro	10s	120	0.6	30	2024-06-24	11:13:40	2024-12-31	10:13:40	2024:06:30	2024-06-30	21:50:18	5.717	C027	Atherurus africanus	7.5	-25	DF	1322.08	3769.26	Koto	3302.8	2024-06-30 21:50:18	2024-06-24 11:13:40	2024-12-31 10:13:40	1	185	0.333	33.028
C:\Users\user-1\Desktop\My_PHD\5_Redaction_These\Chap2_Metabarcoding & Census\Census\1_Data_Collection\Dossier4\C027\Thryonomys swinderianus\DSCF0075.JPG	DSCF0075.JPG	405682	768980	GardePro	10s	120	0.6	30	2024-06-24	11:13:40	2024-12-31	10:13:40	2024:06:30	2024-06-30	21:50:21	5.717	C027	Atherurus africanus	7.5	20	DF	1322.08	3769.26	Koto	3302.8	2024-06-30 21:50:21	2024-06-24 11:13:40	2024-12-31 10:13:40	1	186	0.333	33.028
C:\Users\user-1\Desktop\My_PHD\5_Redaction_These\Chap2_Metabarcoding & Census\Census\1_Data_Collection\Dossier4\C027\Thryonomys swinderianus\DSCF0076.JPG	DSCF0076.JPG	405682	768980	GardePro	10s	120	0.6	30	2024-06-24	11:13:40	2024-12-31	10:13:40	2024:06:30	2024-06-30	21:50:21	5.717	C027	Atherurus africanus	7.5	25	DF	1322.08	3769.26	Koto	3302.8	2024-06-30 21:50:21	2024-06-24 11:13:40	2024-12-31 10:13:40	1	187	0.333	33.028
C:\Users\user-1\Desktop\My_PHD\5_Redaction_These\Chap2_Metabarcoding & Census\Census\1_Data_Collection\Dossier4\C027\Thryonomys swinderianus\DSCF0077.JPG	DSCF0077.JPG	405682	768980	GardePro	10s	120	0.6	30	2024-06-24	11:13:40	2024-12-31	10:13:40	2024:06:30	2024-06-30	21:51:27	5.722	C027	Atherurus africanus	7.5	40	DF	1322.08	3769.26	Koto	3302.8	2024-06-30 21:51:27	2024-06-24 11:13:40	2024-12-31 10:13:40	1	188	0.333	33.028
C:\Users\user-1\Desktop\My_PHD\5_Redaction_These\Chap2_Metabarcoding & Census\Census\1_Data_Collection\Dossier4\C027\Thryonomys swinderianus\DSCF0078.JPG	DSCF0078.JPG	405682	768980	GardePro	10s	120	0.6	30	2024-06-24	11:13:40	2024-12-31	10:13:40	2024:06:30	2024-06-30	21:51:27	5.722	C027	Atherurus africanus	7.5	35	DF	1322.08	3769.26	Koto	3302.8	2024-06-30 21:51:27	2024-06-24 11:13:40	2024-12-31 10:13:40	1	189	0.333	33.028
C:\Users\user-1\Desktop\My_PHD\5_Redaction_These\Chap2_Metabarcoding & Census\Census\1_Data_Collection\Dossier4\C027\Thryonomys swinderianus\DSCF0079.JPG	DSCF0079.JPG	405682	768980	GardePro	10s	120	0.6	30	2024-06-24	11:13:40	2024-12-31	10:13:40	2024:06:30	2024-06-30	21:51:33	5.723	C027	Atherurus africanus	5.5	25	DF	1322.08	3769.26	Koto	3302.8	2024-06-30 21:51:33	2024-06-24 11:13:40	2024-12-31 10:13:40	1	190	0.333	33.028
C:\Users\user-1\Desktop\My_PHD\5_Redaction_These\Chap2_Metabarcoding & Census\Census\1_Data_Collection\Dossier4\C027\Thryonomys swinderianus\DSCF0080.JPG	DSCF0080.JPG	405682	768980	GardePro	10s	120	0.6	30	2024-06-24	11:13:40	2024-12-31	10:13:40	2024:06:30	2024-06-30	21:51:33	5.723	C027	Atherurus africanus	5.5	25	DF	1322.08	3769.26	Koto	3302.8	2024-06-30 21:51:33	2024-06-24 11:13:40	2024-12-31 10:13:40	1	191	0.333	33.028
C:\Users\user-1\Desktop\My_PHD\5_Redaction_These\Chap2_Metabarcoding & Census\Census\1_Data_Collection\Dossier4\C027\Thryonomys swinderianus\DSCF0080.JPG	DSCF0080.JPG	405682	768980	GardePro	10s	120	0.6	30	2024-06-24	11:13:40	2024-12-31	10:13:40	2024:06:30	2024-06-30	21:51:33	5.723	C027	Atherurus africanus	5.5	25	DF	1322.08	3769.26	Koto	3302.8	2024-06-30 21:51:33	2024-06-24 11:13:40	2024-12-31 10:13:40	1	192	0.333	33.028
C:\Users\user-1\Desktop\My_PHD\5_Redaction_These\Chap2_Metabarcoding & Census\Census\1_Data_Collection\Dossier4\C027\Thryonomys swinderianus\DSCF0081.JPG	DSCF0081.JPG	405682	768980	GardePro	10s	120	0.6	30	2024-06-24	11:13:40	2024-12-31	10:13:40	2024:06:30	2024-06-30	21:51:38	5.723	C027	Atherurus africanus	7.5	-30	DF	1322.08	3769.26	Koto	3302.8	2024-06-30 21:51:38	2024-06-24 11:13:40	2024-12-31 10:13:40	1	193	0.333	33.028
C:\Users\user-1\Desktop\My_PHD\5_Redaction_These\Chap2_Metabarcoding & Census\Census\1_Data_Collection\Dossier4\C027\Thryonomys swinderianus\DSCF0082.JPG	DSCF0082.JPG	405682	768980	GardePro	10s	120	0.6	30	2024-06-24	11:13:40	2024-12-31	10:13:40	2024:06:30	2024-06-30	21:51:38	5.723	C027	Atherurus africanus	7.5	-30	DF	1322.08	3769.26	Koto	3302.8	2024-06-30 21:51:38	2024-06-24 11:13:40	2024-12-31 10:13:40	1	194	0.333	33.028
C:\Users\user-1\Desktop\My_PHD\5_Redaction_These\Chap2_Metabarcoding & Census\Census\1_Data_Collection\Dossier4\C027\Thryonomys swinderianus\DSCF0083.JPG	DSCF0083.JPG	405682	768980	GardePro	10s	120	0.6	30	2024-06-24	11:13:40	2024-12-31	10:13:40	2024:06:30	2024-06-30	21:51:45	5.724	C027	Atherurus africanus	7.5	12	DF	1322.08	3769.26	Koto	3302.8	2024-06-30 21:51:45	2024-06-24 11:13:40	2024-12-31 10:13:40	1	195	0.333	33.028
C:\Users\user-1\Desktop\My_PHD\5_Redaction_These\Chap2_Metabarcoding & Census\Census\1_Data_Collection\Dossier4\C027\Thryonomys swinderianus\DSCF0084.JPG	DSCF0084.JPG	405682	768980	GardePro	10s	120	0.6	30	2024-06-24	11:13:40	2024-12-31	10:13:40	2024:06:30	2024-06-30	21:51:45	5.724	C027	Atherurus africanus	7.5	10	DF	1322.08	3769.26	Koto	3302.8	2024-06-30 21:51:45	2024-06-24 11:13:40	2024-12-31 10:13:40	1	196	0.333	33.028
C:\Users\user-1\Desktop\My_PHD\5_Redaction_These\Chap2_Metabarcoding & Census\Census\1_Data_Collection\Dossier4\C027\Thryonomys swinderianus\DSCF0085.JPG	DSCF0085.JPG	405682	768980	GardePro	10s	120	0.6	30	2024-06-24	11:13:40	2024-12-31	10:13:40	2024:06:30	2024-06-30	21:51:55	5.724	C027	Atherurus africanus	7.5	25	DF	1322.08	3769.26	Koto	3302.8	2024-06-30 21:51:55	2024-06-24 11:13:40	2024-12-31 10:13:40	1	197	0.333	33.028
C:\Users\user-1\Desktop\My_PHD\5_Redaction_These\Chap2_Metabarcoding & Census\Census\1_Data_Collection\Dossier4\C027\Thryonomys swinderianus\DSCF0086.JPG	DSCF0086.JPG	405682	768980	GardePro	10s	120	0.6	30	2024-06-24	11:13:40	2024-12-31	10:13:40	2024:06:30	2024-06-30	21:51:55	5.724	C027	Atherurus africanus	7.5	30	DF	1322.08	3769.26	Koto	3302.8	2024-06-30 21:51:55	2024-06-24 11:13:40	2024-12-31 10:13:40	1	198	0.333	33.028
C:\Users\user-1\Desktop\My_PHD\5_Redaction_These\Chap2_Metabarcoding & Census\Census\1_Data_Collection\Dossier4\C027\Thryonomys swinderianus\DSCF0087.JPG	DSCF0087.JPG	405682	768980	GardePro	10s	120	0.6	30	2024-06-24	11:13:40	2024-12-31	10:13:40	2024:06:30	2024-06-30	21:52:01	5.725	C027	Atherurus africanus	7.5	35	DF	1322.08	3769.26	Koto	3302.8	2024-06-30 21:52:01	2024-06-24 11:13:40	2024-12-31 10:13:40	1	199	0.333	33.028
C:\Users\user-1\Desktop\My_PHD\5_Redaction_These\Chap2_Metabarcoding & Census\Census\1_Data_Collection\Dossier4\C027\Thryonomys swinderianus\DSCF0088.JPG	DSCF0088.JPG	405682	768980	GardePro	10s	120	0.6	30	2024-06-24	11:13:40	2024-12-31	10:13:40	2024:06:30	2024-06-30	21:52:02	5.725	C027	Atherurus africanus	7.5	40	DF	1322.08	3769.26	Koto	3302.8	2024-06-30 21:52:02	2024-06-24 11:13:40	2024-12-31 10:13:40	1	200	0.333	33.028
C:\Users\user-1\Desktop\My_PHD\5_Redaction_These\Chap2_Metabarcoding & Census\Census\1_Data_Collection\Dossier4\C027\Thryonomys swinderianus\DSCF0089.JPG	DSCF0089.JPG	405682	768980	GardePro	10s	120	0.6	30	2024-06-24	11:13:40	2024-12-31	10:13:40	2024:06:30	2024-06-30	21:58:03	5.751	C027	Atherurus africanus	6.5	28	DF	1322.08	3769.26	Koto	3302.8	2024-06-30 21:58:03	2024-06-24 11:13:40	2024-12-31 10:13:40	1	201	0.333	33.028
C:\Users\user-1\Desktop\My_PHD\5_Redaction_These\Chap2_Metabarcoding & Census\Census\1_Data_Collection\Dossier4\C027\Thryonomys swinderianus\DSCF0090.JPG	DSCF0090.JPG	405682	768980	GardePro	10s	120	0.6	30	2024-06-24	11:13:40	2024-12-31	10:13:40	2024:06:30	2024-06-30	21:58:04	5.751	C027	Atherurus africanus	6	20	DF	1322.08	3769.26	Koto	3302.8	2024-06-30 21:58:04	2024-06-24 11:13:40	2024-12-31 10:13:40	1	202	0.333	33.028
C:\Users\user-1\Desktop\My_PHD\5_Redaction_These\Chap2_Metabarcoding & Census\Census\1_Data_Collection\Dossier5\C033\Potamochoerus porcus\DSCF0011.JPG	DSCF0011.JPG	403721	769978	GardePro	10s	120	0.6	30	2024-06-27	13:20:57	2024-12-31	12:20:57	2024:06:30	2024-06-30	20:24:29	5.343	C033	Potamochoerus porcus	5	10	DF	394.703	1701.99	Koto	3302.8	2024-06-30 20:24:29	2024-06-27 13:20:57	2024-12-31 12:20:57	1	203	0.333	33.028
C:\Users\user-1\Desktop\My_PHD\5_Redaction_These\Chap2_Metabarcoding & Census\Census\1_Data_Collection\Dossier5\C033\Potamochoerus porcus\DSCF0011.JPG	DSCF0011.JPG	403721	769978	GardePro	10s	120	0.6	30	2024-06-27	13:20:57	2024-12-31	12:20:57	2024:06:30	2024-06-30	20:24:29	5.343	C033	Potamochoerus porcus	5	10	DF	394.703	1701.99	Koto	3302.8	2024-06-30 20:24:29	2024-06-27 13:20:57	2024-12-31 12:20:57	1	204	0.333	33.028
C:\Users\user-1\Desktop\My_PHD\5_Redaction_These\Chap2_Metabarcoding & Census\Census\1_Data_Collection\Dossier5\C033\Potamochoerus porcus\DSCF0011.JPG	DSCF0011.JPG	403721	769978	GardePro	10s	120	0.6	30	2024-06-27	13:20:57	2024-12-31	12:20:57	2024:06:30	2024-06-30	20:24:29	5.343	C033	Potamochoerus porcus	5	10	DF	394.703	1701.99	Koto	3302.8	2024-06-30 20:24:29	2024-06-27 13:20:57	2024-12-31 12:20:57	1	205	0.333	33.028
C:\Users\user-1\Desktop\My_PHD\5_Redaction_These\Chap2_Metabarcoding & Census\Census\1_Data_Collection\Dossier5\C033\Potamochoerus porcus\DSCF0011.JPG	DSCF0011.JPG	403721	769978	GardePro	10s	120	0.6	30	2024-06-27	13:20:57	2024-12-31	12:20:57	2024:06:30	2024-06-30	20:24:29	5.343	C033	Potamochoerus porcus	5	10	DF	394.703	1701.99	Koto	3302.8	2024-06-30 20:24:29	2024-06-27 13:20:57	2024-12-31 12:20:57	1	206	0.333	33.028
C:\Users\user-1\Desktop\My_PHD\5_Redaction_These\Chap2_Metabarcoding & Census\Census\1_Data_Collection\Dossier5\C033\Potamochoerus porcus\DSCF0012.JPG	DSCF0012.JPG	403721	769978	GardePro	10s	120	0.6	30	2024-06-27	13:20:57	2024-12-31	12:20:57	2024:06:30	2024-06-30	20:24:29	5.343	C033	Potamochoerus porcus	5	0	DF	394.703	1701.99	Koto	3302.8	2024-06-30 20:24:29	2024-06-27 13:20:57	2024-12-31 12:20:57	1	207	0.333	33.028
C:\Users\user-1\Desktop\My_PHD\5_Redaction_These\Chap2_Metabarcoding & Census\Census\1_Data_Collection\Dossier5\C033\Potamochoerus porcus\DSCF0012.JPG	DSCF0012.JPG	403721	769978	GardePro	10s	120	0.6	30	2024-06-27	13:20:57	2024-12-31	12:20:57	2024:06:30	2024-06-30	20:24:29	5.343	C033	Potamochoerus porcus	5	0	DF	394.703	1701.99	Koto	3302.8	2024-06-30 20:24:29	2024-06-27 13:20:57	2024-12-31 12:20:57	1	208	0.333	33.028
C:\Users\user-1\Desktop\My_PHD\5_Redaction_These\Chap2_Metabarcoding & Census\Census\1_Data_Collection\Dossier5\C033\Potamochoerus porcus\DSCF0012.JPG	DSCF0012.JPG	403721	769978	GardePro	10s	120	0.6	30	2024-06-27	13:20:57	2024-12-31	12:20:57	2024:06:30	2024-06-30	20:24:29	5.343	C033	Potamochoerus porcus	5	0	DF	394.703	1701.99	Koto	3302.8	2024-06-30 20:24:29	2024-06-27 13:20:57	2024-12-31 12:20:57	1	209	0.333	33.028
C:\Users\user-1\Desktop\My_PHD\5_Redaction_These\Chap2_Metabarcoding & Census\Census\1_Data_Collection\Dossier5\C033\Potamochoerus porcus\DSCF0012.JPG	DSCF0012.JPG	403721	769978	GardePro	10s	120	0.6	30	2024-06-27	13:20:57	2024-12-31	12:20:57	2024:06:30	2024-06-30	20:24:29	5.343	C033	Potamochoerus porcus	5	0	DF	394.703	1701.99	Koto	3302.8	2024-06-30 20:24:29	2024-06-27 13:20:57	2024-12-31 12:20:57	1	210	0.333	33.028
C:\Users\user-1\Desktop\My_PHD\5_Redaction_These\Chap2_Metabarcoding & Census\Census\1_Data_Collection\Dossier5\C033\Potamochoerus porcus\DSCF0013.JPG	DSCF0013.JPG	403721	769978	GardePro	10s	120	0.6	30	2024-06-27	13:20:57	2024-12-31	12:20:57	2024:06:30	2024-06-30	20:24:34	5.343	C033	Potamochoerus porcus	5	-5	DF	394.703	1701.99	Koto	3302.8	2024-06-30 20:24:34	2024-06-27 13:20:57	2024-12-31 12:20:57	1	211	0.333	33.028
C:\Users\user-1\Desktop\My_PHD\5_Redaction_These\Chap2_Metabarcoding & Census\Census\1_Data_Collection\Dossier5\C033\Potamochoerus porcus\DSCF0013.JPG	DSCF0013.JPG	403721	769978	GardePro	10s	120	0.6	30	2024-06-27	13:20:57	2024-12-31	12:20:57	2024:06:30	2024-06-30	20:24:34	5.343	C033	Potamochoerus porcus	5	-5	DF	394.703	1701.99	Koto	3302.8	2024-06-30 20:24:34	2024-06-27 13:20:57	2024-12-31 12:20:57	1	212	0.333	33.028
C:\Users\user-1\Desktop\My_PHD\5_Redaction_These\Chap2_Metabarcoding & Census\Census\1_Data_Collection\Dossier5\C033\Potamochoerus porcus\DSCF0013.JPG	DSCF0013.JPG	403721	769978	GardePro	10s	120	0.6	30	2024-06-27	13:20:57	2024-12-31	12:20:57	2024:06:30	2024-06-30	20:24:34	5.343	C033	Potamochoerus porcus	5	-5	DF	394.703	1701.99	Koto	3302.8	2024-06-30 20:24:34	2024-06-27 13:20:57	2024-12-31 12:20:57	1	213	0.333	33.028
C:\Users\user-1\Desktop\My_PHD\5_Redaction_These\Chap2_Metabarcoding & Census\Census\1_Data_Collection\Dossier5\C033\Potamochoerus porcus\DSCF0013.JPG	DSCF0013.JPG	403721	769978	GardePro	10s	120	0.6	30	2024-06-27	13:20:57	2024-12-31	12:20:57	2024:06:30	2024-06-30	20:24:34	5.343	C033	Potamochoerus porcus	5	-5	DF	394.703	1701.99	Koto	3302.8	2024-06-30 20:24:34	2024-06-27 13:20:57	2024-12-31 12:20:57	1	214	0.333	33.028
C:\Users\user-1\Desktop\My_PHD\5_Redaction_These\Chap2_Metabarcoding & Census\Census\1_Data_Collection\Dossier5\C033\Potamochoerus porcus\DSCF0014.JPG	DSCF0014.JPG	403721	769978	GardePro	10s	120	0.6	30	2024-06-27	13:20:57	2024-12-31	12:20:57	2024:06:30	2024-06-30	20:24:34	5.343	C033	Potamochoerus porcus	5	-5	DF	394.703	1701.99	Koto	3302.8	2024-06-30 20:24:34	2024-06-27 13:20:57	2024-12-31 12:20:57	1	215	0.333	33.028
C:\Users\user-1\Desktop\My_PHD\5_Redaction_These\Chap2_Metabarcoding & Census\Census\1_Data_Collection\Dossier5\C033\Potamochoerus porcus\DSCF0014.JPG	DSCF0014.JPG	403721	769978	GardePro	10s	120	0.6	30	2024-06-27	13:20:57	2024-12-31	12:20:57	2024:06:30	2024-06-30	20:24:34	5.343	C033	Potamochoerus porcus	5	-5	DF	394.703	1701.99	Koto	3302.8	2024-06-30 20:24:34	2024-06-27 13:20:57	2024-12-31 12:20:57	1	216	0.333	33.028
C:\Users\user-1\Desktop\My_PHD\5_Redaction_These\Chap2_Metabarcoding & Census\Census\1_Data_Collection\Dossier5\C033\Potamochoerus porcus\DSCF0014.JPG	DSCF0014.JPG	403721	769978	GardePro	10s	120	0.6	30	2024-06-27	13:20:57	2024-12-31	12:20:57	2024:06:30	2024-06-30	20:24:34	5.343	C033	Potamochoerus porcus	5	-5	DF	394.703	1701.99	Koto	3302.8	2024-06-30 20:24:34	2024-06-27 13:20:57	2024-12-31 12:20:57	1	217	0.333	33.028
C:\Users\user-1\Desktop\My_PHD\5_Redaction_These\Chap2_Metabarcoding & Census\Census\1_Data_Collection\Dossier5\C033\Potamochoerus porcus\DSCF0014.JPG	DSCF0014.JPG	403721	769978	GardePro	10s	120	0.6	30	2024-06-27	13:20:57	2024-12-31	12:20:57	2024:06:30	2024-06-30	20:24:34	5.343	C033	Potamochoerus porcus	5	-5	DF	394.703	1701.99	Koto	3302.8	2024-06-30 20:24:34	2024-06-27 13:20:57	2024-12-31 12:20:57	1	218	0.333	33.028
C:\Users\user-1\Desktop\My_PHD\5_Redaction_These\Chap2_Metabarcoding & Census\Census\1_Data_Collection\Dossier5\C033\Potamochoerus porcus\DSCF0015.JPG	DSCF0015.JPG	403721	769978	GardePro	10s	120	0.6	30	2024-06-27	13:20:57	2024-12-31	12:20:57	2024:06:30	2024-06-30	20:24:40	5.344	C033	Potamochoerus porcus	5	-10	DF	394.703	1701.99	Koto	3302.8	2024-06-30 20:24:40	2024-06-27 13:20:57	2024-12-31 12:20:57	1	219	0.333	33.028
C:\Users\user-1\Desktop\My_PHD\5_Redaction_These\Chap2_Metabarcoding & Census\Census\1_Data_Collection\Dossier5\C033\Potamochoerus porcus\DSCF0015.JPG	DSCF0015.JPG	403721	769978	GardePro	10s	120	0.6	30	2024-06-27	13:20:57	2024-12-31	12:20:57	2024:06:30	2024-06-30	20:24:40	5.344	C033	Potamochoerus porcus	5	-10	DF	394.703	1701.99	Koto	3302.8	2024-06-30 20:24:40	2024-06-27 13:20:57	2024-12-31 12:20:57	1	220	0.333	33.028
C:\Users\user-1\Desktop\My_PHD\5_Redaction_These\Chap2_Metabarcoding & Census\Census\1_Data_Collection\Dossier5\C033\Potamochoerus porcus\DSCF0015.JPG	DSCF0015.JPG	403721	769978	GardePro	10s	120	0.6	30	2024-06-27	13:20:57	2024-12-31	12:20:57	2024:06:30	2024-06-30	20:24:40	5.344	C033	Potamochoerus porcus	5	-10	DF	394.703	1701.99	Koto	3302.8	2024-06-30 20:24:40	2024-06-27 13:20:57	2024-12-31 12:20:57	1	221	0.333	33.028
C:\Users\user-1\Desktop\My_PHD\5_Redaction_These\Chap2_Metabarcoding & Census\Census\1_Data_Collection\Dossier5\C033\Potamochoerus porcus\DSCF0015.JPG	DSCF0015.JPG	403721	769978	GardePro	10s	120	0.6	30	2024-06-27	13:20:57	2024-12-31	12:20:57	2024:06:30	2024-06-30	20:24:40	5.344	C033	Potamochoerus porcus	5	-10	DF	394.703	1701.99	Koto	3302.8	2024-06-30 20:24:40	2024-06-27 13:20:57	2024-12-31 12:20:57	1	222	0.333	33.028
C:\Users\user-1\Desktop\My_PHD\5_Redaction_These\Chap2_Metabarcoding & Census\Census\1_Data_Collection\Dossier5\C033\Potamochoerus porcus\DSCF0016.JPG	DSCF0016.JPG	403721	769978	GardePro	10s	120	0.6	30	2024-06-27	13:20:57	2024-12-31	12:20:57	2024:06:30	2024-06-30	20:24:40	5.344	C033	Potamochoerus porcus	5	-10	DF	394.703	1701.99	Koto	3302.8	2024-06-30 20:24:40	2024-06-27 13:20:57	2024-12-31 12:20:57	1	223	0.333	33.028
C:\Users\user-1\Desktop\My_PHD\5_Redaction_These\Chap2_Metabarcoding & Census\Census\1_Data_Collection\Dossier5\C033\Potamochoerus porcus\DSCF0016.JPG	DSCF0016.JPG	403721	769978	GardePro	10s	120	0.6	30	2024-06-27	13:20:57	2024-12-31	12:20:57	2024:06:30	2024-06-30	20:24:40	5.344	C033	Potamochoerus porcus	5	-10	DF	394.703	1701.99	Koto	3302.8	2024-06-30 20:24:40	2024-06-27 13:20:57	2024-12-31 12:20:57	1	224	0.333	33.028
C:\Users\user-1\Desktop\My_PHD\5_Redaction_These\Chap2_Metabarcoding & Census\Census\1_Data_Collection\Dossier5\C033\Potamochoerus porcus\DSCF0016.JPG	DSCF0016.JPG	403721	769978	GardePro	10s	120	0.6	30	2024-06-27	13:20:57	2024-12-31	12:20:57	2024:06:30	2024-06-30	20:24:40	5.344	C033	Potamochoerus porcus	5	-10	DF	394.703	1701.99	Koto	3302.8	2024-06-30 20:24:40	2024-06-27 13:20:57	2024-12-31 12:20:57	1	225	0.333	33.028
C:\Users\user-1\Desktop\My_PHD\5_Redaction_These\Chap2_Metabarcoding & Census\Census\1_Data_Collection\Dossier5\C033\Potamochoerus porcus\DSCF0016.JPG	DSCF0016.JPG	403721	769978	GardePro	10s	120	0.6	30	2024-06-27	13:20:57	2024-12-31	12:20:57	2024:06:30	2024-06-30	20:24:40	5.344	C033	Potamochoerus porcus	5	-10	DF	394.703	1701.99	Koto	3302.8	2024-06-30 20:24:40	2024-06-27 13:20:57	2024-12-31 12:20:57	1	226	0.333	33.028
C:\Users\user-1\Desktop\My_PHD\5_Redaction_These\Chap2_Metabarcoding & Census\Census\1_Data_Collection\Dossier5\C033\Potamochoerus porcus\DSCF0017.JPG	DSCF0017.JPG	403721	769978	GardePro	10s	120	0.6	30	2024-06-27	13:20:57	2024-12-31	12:20:57	2024:06:30	2024-06-30	20:24:46	5.344	C033	Potamochoerus porcus	4.5	-10	DF	394.703	1701.99	Koto	3302.8	2024-06-30 20:24:46	2024-06-27 13:20:57	2024-12-31 12:20:57	1	227	0.333	33.028
C:\Users\user-1\Desktop\My_PHD\5_Redaction_These\Chap2_Metabarcoding & Census\Census\1_Data_Collection\Dossier5\C033\Potamochoerus porcus\DSCF0017.JPG	DSCF0017.JPG	403721	769978	GardePro	10s	120	0.6	30	2024-06-27	13:20:57	2024-12-31	12:20:57	2024:06:30	2024-06-30	20:24:46	5.344	C033	Potamochoerus porcus	4.5	-10	DF	394.703	1701.99	Koto	3302.8	2024-06-30 20:24:46	2024-06-27 13:20:57	2024-12-31 12:20:57	1	228	0.333	33.028
C:\Users\user-1\Desktop\My_PHD\5_Redaction_These\Chap2_Metabarcoding & Census\Census\1_Data_Collection\Dossier5\C033\Potamochoerus porcus\DSCF0017.JPG	DSCF0017.JPG	403721	769978	GardePro	10s	120	0.6	30	2024-06-27	13:20:57	2024-12-31	12:20:57	2024:06:30	2024-06-30	20:24:46	5.344	C033	Potamochoerus porcus	4.5	-10	DF	394.703	1701.99	Koto	3302.8	2024-06-30 20:24:46	2024-06-27 13:20:57	2024-12-31 12:20:57	1	229	0.333	33.028
C:\Users\user-1\Desktop\My_PHD\5_Redaction_These\Chap2_Metabarcoding & Census\Census\1_Data_Collection\Dossier5\C033\Potamochoerus porcus\DSCF0017.JPG	DSCF0017.JPG	403721	769978	GardePro	10s	120	0.6	30	2024-06-27	13:20:57	2024-12-31	12:20:57	2024:06:30	2024-06-30	20:24:46	5.344	C033	Potamochoerus porcus	4.5	-10	DF	394.703	1701.99	Koto	3302.8	2024-06-30 20:24:46	2024-06-27 13:20:57	2024-12-31 12:20:57	1	230	0.333	33.028
C:\Users\user-1\Desktop\My_PHD\5_Redaction_These\Chap2_Metabarcoding & Census\Census\1_Data_Collection\Dossier5\C033\Potamochoerus porcus\DSCF0018.JPG	DSCF0018.JPG	403721	769978	GardePro	10s	120	0.6	30	2024-06-27	13:20:57	2024-12-31	12:20:57	2024:06:30	2024-06-30	20:24:46	5.344	C033	Potamochoerus porcus	4.5	-10	DF	394.703	1701.99	Koto	3302.8	2024-06-30 20:24:46	2024-06-27 13:20:57	2024-12-31 12:20:57	1	231	0.333	33.028
C:\Users\user-1\Desktop\My_PHD\5_Redaction_These\Chap2_Metabarcoding & Census\Census\1_Data_Collection\Dossier5\C033\Potamochoerus porcus\DSCF0018.JPG	DSCF0018.JPG	403721	769978	GardePro	10s	120	0.6	30	2024-06-27	13:20:57	2024-12-31	12:20:57	2024:06:30	2024-06-30	20:24:46	5.344	C033	Potamochoerus porcus	4.5	-10	DF	394.703	1701.99	Koto	3302.8	2024-06-30 20:24:46	2024-06-27 13:20:57	2024-12-31 12:20:57	1	232	0.333	33.028
C:\Users\user-1\Desktop\My_PHD\5_Redaction_These\Chap2_Metabarcoding & Census\Census\1_Data_Collection\Dossier5\C033\Potamochoerus porcus\DSCF0018.JPG	DSCF0018.JPG	403721	769978	GardePro	10s	120	0.6	30	2024-06-27	13:20:57	2024-12-31	12:20:57	2024:06:30	2024-06-30	20:24:46	5.344	C033	Potamochoerus porcus	4.5	-10	DF	394.703	1701.99	Koto	3302.8	2024-06-30 20:24:46	2024-06-27 13:20:57	2024-12-31 12:20:57	1	233	0.333	33.028
C:\Users\user-1\Desktop\My_PHD\5_Redaction_These\Chap2_Metabarcoding & Census\Census\1_Data_Collection\Dossier5\C033\Potamochoerus porcus\DSCF0018.JPG	DSCF0018.JPG	403721	769978	GardePro	10s	120	0.6	30	2024-06-27	13:20:57	2024-12-31	12:20:57	2024:06:30	2024-06-30	20:24:46	5.344	C033	Potamochoerus porcus	4.5	-10	DF	394.703	1701.99	Koto	3302.8	2024-06-30 20:24:46	2024-06-27 13:20:57	2024-12-31 12:20:57	1	234	0.333	33.028
C:\Users\user-1\Desktop\My_PHD\5_Redaction_These\Chap2_Metabarcoding & Census\Census\1_Data_Collection\Dossier5\C033\Potamochoerus porcus\DSCF0019.JPG	DSCF0019.JPG	403721	769978	GardePro	10s	120	0.6	30	2024-06-27	13:20:57	2024-12-31	12:20:57	2024:06:30	2024-06-30	20:24:57	5.345	C033	Potamochoerus porcus	4.5	-10	DF	394.703	1701.99	Koto	3302.8	2024-06-30 20:24:57	2024-06-27 13:20:57	2024-12-31 12:20:57	1	235	0.333	33.028
C:\Users\user-1\Desktop\My_PHD\5_Redaction_These\Chap2_Metabarcoding & Census\Census\1_Data_Collection\Dossier5\C033\Potamochoerus porcus\DSCF0019.JPG	DSCF0019.JPG	403721	769978	GardePro	10s	120	0.6	30	2024-06-27	13:20:57	2024-12-31	12:20:57	2024:06:30	2024-06-30	20:24:57	5.345	C033	Potamochoerus porcus	4.5	-10	DF	394.703	1701.99	Koto	3302.8	2024-06-30 20:24:57	2024-06-27 13:20:57	2024-12-31 12:20:57	1	236	0.333	33.028
C:\Users\user-1\Desktop\My_PHD\5_Redaction_These\Chap2_Metabarcoding & Census\Census\1_Data_Collection\Dossier5\C033\Potamochoerus porcus\DSCF0019.JPG	DSCF0019.JPG	403721	769978	GardePro	10s	120	0.6	30	2024-06-27	13:20:57	2024-12-31	12:20:57	2024:06:30	2024-06-30	20:24:57	5.345	C033	Potamochoerus porcus	4.5	-10	DF	394.703	1701.99	Koto	3302.8	2024-06-30 20:24:57	2024-06-27 13:20:57	2024-12-31 12:20:57	1	237	0.333	33.028
C:\Users\user-1\Desktop\My_PHD\5_Redaction_These\Chap2_Metabarcoding & Census\Census\1_Data_Collection\Dossier5\C033\Potamochoerus porcus\DSCF0019.JPG	DSCF0019.JPG	403721	769978	GardePro	10s	120	0.6	30	2024-06-27	13:20:57	2024-12-31	12:20:57	2024:06:30	2024-06-30	20:24:57	5.345	C033	Potamochoerus porcus	4.5	-10	DF	394.703	1701.99	Koto	3302.8	2024-06-30 20:24:57	2024-06-27 13:20:57	2024-12-31 12:20:57	1	238	0.333	33.028
C:\Users\user-1\Desktop\My_PHD\5_Redaction_These\Chap2_Metabarcoding & Census\Census\1_Data_Collection\Dossier5\C033\Potamochoerus porcus\DSCF0020.JPG	DSCF0020.JPG	403721	769978	GardePro	10s	120	0.6	30	2024-06-27	13:20:57	2024-12-31	12:20:57	2024:06:30	2024-06-30	20:24:57	5.345	C033	Potamochoerus porcus	4.5	-15	DF	394.703	1701.99	Koto	3302.8	2024-06-30 20:24:57	2024-06-27 13:20:57	2024-12-31 12:20:57	1	239	0.333	33.028
C:\Users\user-1\Desktop\My_PHD\5_Redaction_These\Chap2_Metabarcoding & Census\Census\1_Data_Collection\Dossier5\C033\Potamochoerus porcus\DSCF0020.JPG	DSCF0020.JPG	403721	769978	GardePro	10s	120	0.6	30	2024-06-27	13:20:57	2024-12-31	12:20:57	2024:06:30	2024-06-30	20:24:57	5.345	C033	Potamochoerus porcus	4.5	-15	DF	394.703	1701.99	Koto	3302.8	2024-06-30 20:24:57	2024-06-27 13:20:57	2024-12-31 12:20:57	1	240	0.333	33.028
C:\Users\user-1\Desktop\My_PHD\5_Redaction_These\Chap2_Metabarcoding & Census\Census\1_Data_Collection\Dossier5\C033\Potamochoerus porcus\DSCF0020.JPG	DSCF0020.JPG	403721	769978	GardePro	10s	120	0.6	30	2024-06-27	13:20:57	2024-12-31	12:20:57	2024:06:30	2024-06-30	20:24:57	5.345	C033	Potamochoerus porcus	4.5	-15	DF	394.703	1701.99	Koto	3302.8	2024-06-30 20:24:57	2024-06-27 13:20:57	2024-12-31 12:20:57	1	241	0.333	33.028
C:\Users\user-1\Desktop\My_PHD\5_Redaction_These\Chap2_Metabarcoding & Census\Census\1_Data_Collection\Dossier5\C033\Potamochoerus porcus\DSCF0020.JPG	DSCF0020.JPG	403721	769978	GardePro	10s	120	0.6	30	2024-06-27	13:20:57	2024-12-31	12:20:57	2024:06:30	2024-06-30	20:24:57	5.345	C033	Potamochoerus porcus	4.5	-15	DF	394.703	1701.99	Koto	3302.8	2024-06-30 20:24:57	2024-06-27 13:20:57	2024-12-31 12:20:57	1	242	0.333	33.028
C:\Users\user-1\Desktop\My_PHD\5_Redaction_These\Chap2_Metabarcoding & Census\Census\1_Data_Collection\Dossier5\C033\Potamochoerus porcus\DSCF0021.JPG	DSCF0021.JPG	403721	769978	GardePro	10s	120	0.6	30	2024-06-27	13:20:57	2024-12-31	12:20:57	2024:06:30	2024-06-30	20:25:03	5.345	C033	Potamochoerus porcus	4.5	-20	DF	394.703	1701.99	Koto	3302.8	2024-06-30 20:25:03	2024-06-27 13:20:57	2024-12-31 12:20:57	1	243	0.333	33.028
C:\Users\user-1\Desktop\My_PHD\5_Redaction_These\Chap2_Metabarcoding & Census\Census\1_Data_Collection\Dossier5\C033\Potamochoerus porcus\DSCF0021.JPG	DSCF0021.JPG	403721	769978	GardePro	10s	120	0.6	30	2024-06-27	13:20:57	2024-12-31	12:20:57	2024:06:30	2024-06-30	20:25:03	5.345	C033	Potamochoerus porcus	4.5	-20	DF	394.703	1701.99	Koto	3302.8	2024-06-30 20:25:03	2024-06-27 13:20:57	2024-12-31 12:20:57	1	244	0.333	33.028
C:\Users\user-1\Desktop\My_PHD\5_Redaction_These\Chap2_Metabarcoding & Census\Census\1_Data_Collection\Dossier5\C033\Potamochoerus porcus\DSCF0021.JPG	DSCF0021.JPG	403721	769978	GardePro	10s	120	0.6	30	2024-06-27	13:20:57	2024-12-31	12:20:57	2024:06:30	2024-06-30	20:25:03	5.345	C033	Potamochoerus porcus	4.5	-20	DF	394.703	1701.99	Koto	3302.8	2024-06-30 20:25:03	2024-06-27 13:20:57	2024-12-31 12:20:57	1	245	0.333	33.028
C:\Users\user-1\Desktop\My_PHD\5_Redaction_These\Chap2_Metabarcoding & Census\Census\1_Data_Collection\Dossier5\C033\Potamochoerus porcus\DSCF0021.JPG	DSCF0021.JPG	403721	769978	GardePro	10s	120	0.6	30	2024-06-27	13:20:57	2024-12-31	12:20:57	2024:06:30	2024-06-30	20:25:03	5.345	C033	Potamochoerus porcus	4.5	-20	DF	394.703	1701.99	Koto	3302.8	2024-06-30 20:25:03	2024-06-27 13:20:57	2024-12-31 12:20:57	1	246	0.333	33.028
C:\Users\user-1\Desktop\My_PHD\5_Redaction_These\Chap2_Metabarcoding & Census\Census\1_Data_Collection\Dossier5\C033\Potamochoerus porcus\DSCF0022.JPG	DSCF0022.JPG	403721	769978	GardePro	10s	120	0.6	30	2024-06-27	13:20:57	2024-12-31	12:20:57	2024:06:30	2024-06-30	20:25:03	5.345	C033	Potamochoerus porcus	4.5	-20	DF	394.703	1701.99	Koto	3302.8	2024-06-30 20:25:03	2024-06-27 13:20:57	2024-12-31 12:20:57	1	247	0.333	33.028
C:\Users\user-1\Desktop\My_PHD\5_Redaction_These\Chap2_Metabarcoding & Census\Census\1_Data_Collection\Dossier5\C033\Potamochoerus porcus\DSCF0022.JPG	DSCF0022.JPG	403721	769978	GardePro	10s	120	0.6	30	2024-06-27	13:20:57	2024-12-31	12:20:57	2024:06:30	2024-06-30	20:25:03	5.345	C033	Potamochoerus porcus	4.5	-20	DF	394.703	1701.99	Koto	3302.8	2024-06-30 20:25:03	2024-06-27 13:20:57	2024-12-31 12:20:57	1	248	0.333	33.028
C:\Users\user-1\Desktop\My_PHD\5_Redaction_These\Chap2_Metabarcoding & Census\Census\1_Data_Collection\Dossier5\C033\Potamochoerus porcus\DSCF0022.JPG	DSCF0022.JPG	403721	769978	GardePro	10s	120	0.6	30	2024-06-27	13:20:57	2024-12-31	12:20:57	2024:06:30	2024-06-30	20:25:03	5.345	C033	Potamochoerus porcus	4.5	-20	DF	394.703	1701.99	Koto	3302.8	2024-06-30 20:25:03	2024-06-27 13:20:57	2024-12-31 12:20:57	1	249	0.333	33.028
C:\Users\user-1\Desktop\My_PHD\5_Redaction_These\Chap2_Metabarcoding & Census\Census\1_Data_Collection\Dossier5\C033\Potamochoerus porcus\DSCF0022.JPG	DSCF0022.JPG	403721	769978	GardePro	10s	120	0.6	30	2024-06-27	13:20:57	2024-12-31	12:20:57	2024:06:30	2024-06-30	20:25:03	5.345	C033	Potamochoerus porcus	4.5	-20	DF	394.703	1701.99	Koto	3302.8	2024-06-30 20:25:03	2024-06-27 13:20:57	2024-12-31 12:20:57	1	250	0.333	33.028
C:\Users\user-1\Desktop\My_PHD\5_Redaction_These\Chap2_Metabarcoding & Census\Census\1_Data_Collection\Dossier5\C033\Potamochoerus porcus\DSCF0023.JPG	DSCF0023.JPG	403721	769978	GardePro	10s	120	0.6	30	2024-06-27	13:20:57	2024-12-31	12:20:57	2024:06:30	2024-06-30	20:25:11	5.346	C033	Potamochoerus porcus	4.5	-20	DF	394.703	1701.99	Koto	3302.8	2024-06-30 20:25:11	2024-06-27 13:20:57	2024-12-31 12:20:57	1	251	0.333	33.028
C:\Users\user-1\Desktop\My_PHD\5_Redaction_These\Chap2_Metabarcoding & Census\Census\1_Data_Collection\Dossier5\C033\Potamochoerus porcus\DSCF0023.JPG	DSCF0023.JPG	403721	769978	GardePro	10s	120	0.6	30	2024-06-27	13:20:57	2024-12-31	12:20:57	2024:06:30	2024-06-30	20:25:11	5.346	C033	Potamochoerus porcus	4.5	-20	DF	394.703	1701.99	Koto	3302.8	2024-06-30 20:25:11	2024-06-27 13:20:57	2024-12-31 12:20:57	1	252	0.333	33.028
C:\Users\user-1\Desktop\My_PHD\5_Redaction_These\Chap2_Metabarcoding & Census\Census\1_Data_Collection\Dossier5\C033\Potamochoerus porcus\DSCF0023.JPG	DSCF0023.JPG	403721	769978	GardePro	10s	120	0.6	30	2024-06-27	13:20:57	2024-12-31	12:20:57	2024:06:30	2024-06-30	20:25:11	5.346	C033	Potamochoerus porcus	4.5	-20	DF	394.703	1701.99	Koto	3302.8	2024-06-30 20:25:11	2024-06-27 13:20:57	2024-12-31 12:20:57	1	253	0.333	33.028
C:\Users\user-1\Desktop\My_PHD\5_Redaction_These\Chap2_Metabarcoding & Census\Census\1_Data_Collection\Dossier5\C033\Potamochoerus porcus\DSCF0023.JPG	DSCF0023.JPG	403721	769978	GardePro	10s	120	0.6	30	2024-06-27	13:20:57	2024-12-31	12:20:57	2024:06:30	2024-06-30	20:25:11	5.346	C033	Potamochoerus porcus	4.5	-20	DF	394.703	1701.99	Koto	3302.8	2024-06-30 20:25:11	2024-06-27 13:20:57	2024-12-31 12:20:57	1	254	0.333	33.028
C:\Users\user-1\Desktop\My_PHD\5_Redaction_These\Chap2_Metabarcoding & Census\Census\1_Data_Collection\Dossier5\C033\Potamochoerus porcus\DSCF0024.JPG	DSCF0024.JPG	403721	769978	GardePro	10s	120	0.6	30	2024-06-27	13:20:57	2024-12-31	12:20:57	2024:06:30	2024-06-30	20:25:11	5.346	C033	Potamochoerus porcus	4.5	-20	DF	394.703	1701.99	Koto	3302.8	2024-06-30 20:25:11	2024-06-27 13:20:57	2024-12-31 12:20:57	1	255	0.333	33.028
C:\Users\user-1\Desktop\My_PHD\5_Redaction_These\Chap2_Metabarcoding & Census\Census\1_Data_Collection\Dossier5\C033\Potamochoerus porcus\DSCF0024.JPG	DSCF0024.JPG	403721	769978	GardePro	10s	120	0.6	30	2024-06-27	13:20:57	2024-12-31	12:20:57	2024:06:30	2024-06-30	20:25:11	5.346	C033	Potamochoerus porcus	4.5	-20	DF	394.703	1701.99	Koto	3302.8	2024-06-30 20:25:11	2024-06-27 13:20:57	2024-12-31 12:20:57	1	256	0.333	33.028
C:\Users\user-1\Desktop\My_PHD\5_Redaction_These\Chap2_Metabarcoding & Census\Census\1_Data_Collection\Dossier5\C033\Potamochoerus porcus\DSCF0024.JPG	DSCF0024.JPG	403721	769978	GardePro	10s	120	0.6	30	2024-06-27	13:20:57	2024-12-31	12:20:57	2024:06:30	2024-06-30	20:25:11	5.346	C033	Potamochoerus porcus	4.5	-20	DF	394.703	1701.99	Koto	3302.8	2024-06-30 20:25:11	2024-06-27 13:20:57	2024-12-31 12:20:57	1	257	0.333	33.028
C:\Users\user-1\Desktop\My_PHD\5_Redaction_These\Chap2_Metabarcoding & Census\Census\1_Data_Collection\Dossier5\C033\Potamochoerus porcus\DSCF0024.JPG	DSCF0024.JPG	403721	769978	GardePro	10s	120	0.6	30	2024-06-27	13:20:57	2024-12-31	12:20:57	2024:06:30	2024-06-30	20:25:11	5.346	C033	Potamochoerus porcus	4.5	-20	DF	394.703	1701.99	Koto	3302.8	2024-06-30 20:25:11	2024-06-27 13:20:57	2024-12-31 12:20:57	1	258	0.333	33.028
C:\Users\user-1\Desktop\My_PHD\5_Redaction_These\Chap2_Metabarcoding & Census\Census\1_Data_Collection\Dossier5\C033\Potamochoerus porcus\DSCF0025.JPG	DSCF0025.JPG	403721	769978	GardePro	10s	120	0.6	30	2024-06-27	13:20:57	2024-12-31	12:20:57	2024:06:30	2024-06-30	20:25:17	5.346	C033	Potamochoerus porcus	4.5	-20	DF	394.703	1701.99	Koto	3302.8	2024-06-30 20:25:17	2024-06-27 13:20:57	2024-12-31 12:20:57	1	259	0.333	33.028
C:\Users\user-1\Desktop\My_PHD\5_Redaction_These\Chap2_Metabarcoding & Census\Census\1_Data_Collection\Dossier5\C033\Potamochoerus porcus\DSCF0025.JPG	DSCF0025.JPG	403721	769978	GardePro	10s	120	0.6	30	2024-06-27	13:20:57	2024-12-31	12:20:57	2024:06:30	2024-06-30	20:25:17	5.346	C033	Potamochoerus porcus	4.5	-20	DF	394.703	1701.99	Koto	3302.8	2024-06-30 20:25:17	2024-06-27 13:20:57	2024-12-31 12:20:57	1	260	0.333	33.028
C:\Users\user-1\Desktop\My_PHD\5_Redaction_These\Chap2_Metabarcoding & Census\Census\1_Data_Collection\Dossier5\C033\Potamochoerus porcus\DSCF0025.JPG	DSCF0025.JPG	403721	769978	GardePro	10s	120	0.6	30	2024-06-27	13:20:57	2024-12-31	12:20:57	2024:06:30	2024-06-30	20:25:17	5.346	C033	Potamochoerus porcus	4.5	-20	DF	394.703	1701.99	Koto	3302.8	2024-06-30 20:25:17	2024-06-27 13:20:57	2024-12-31 12:20:57	1	261	0.333	33.028
C:\Users\user-1\Desktop\My_PHD\5_Redaction_These\Chap2_Metabarcoding & Census\Census\1_Data_Collection\Dossier5\C033\Potamochoerus porcus\DSCF0025.JPG	DSCF0025.JPG	403721	769978	GardePro	10s	120	0.6	30	2024-06-27	13:20:57	2024-12-31	12:20:57	2024:06:30	2024-06-30	20:25:17	5.346	C033	Potamochoerus porcus	4.5	-20	DF	394.703	1701.99	Koto	3302.8	2024-06-30 20:25:17	2024-06-27 13:20:57	2024-12-31 12:20:57	1	262	0.333	33.028
C:\Users\user-1\Desktop\My_PHD\5_Redaction_These\Chap2_Metabarcoding & Census\Census\1_Data_Collection\Dossier5\C033\Potamochoerus porcus\DSCF0026.JPG	DSCF0026.JPG	403721	769978	GardePro	10s	120	0.6	30	2024-06-27	13:20:57	2024-12-31	12:20:57	2024:06:30	2024-06-30	20:25:17	5.346	C033	Potamochoerus porcus	4.5	-20	DF	394.703	1701.99	Koto	3302.8	2024-06-30 20:25:17	2024-06-27 13:20:57	2024-12-31 12:20:57	1	263	0.333	33.028
C:\Users\user-1\Desktop\My_PHD\5_Redaction_These\Chap2_Metabarcoding & Census\Census\1_Data_Collection\Dossier5\C033\Potamochoerus porcus\DSCF0026.JPG	DSCF0026.JPG	403721	769978	GardePro	10s	120	0.6	30	2024-06-27	13:20:57	2024-12-31	12:20:57	2024:06:30	2024-06-30	20:25:17	5.346	C033	Potamochoerus porcus	4.5	-20	DF	394.703	1701.99	Koto	3302.8	2024-06-30 20:25:17	2024-06-27 13:20:57	2024-12-31 12:20:57	1	264	0.333	33.028
C:\Users\user-1\Desktop\My_PHD\5_Redaction_These\Chap2_Metabarcoding & Census\Census\1_Data_Collection\Dossier5\C033\Potamochoerus porcus\DSCF0026.JPG	DSCF0026.JPG	403721	769978	GardePro	10s	120	0.6	30	2024-06-27	13:20:57	2024-12-31	12:20:57	2024:06:30	2024-06-30	20:25:17	5.346	C033	Potamochoerus porcus	4.5	-20	DF	394.703	1701.99	Koto	3302.8	2024-06-30 20:25:17	2024-06-27 13:20:57	2024-12-31 12:20:57	1	265	0.333	33.028
C:\Users\user-1\Desktop\My_PHD\5_Redaction_These\Chap2_Metabarcoding & Census\Census\1_Data_Collection\Dossier5\C033\Potamochoerus porcus\DSCF0026.JPG	DSCF0026.JPG	403721	769978	GardePro	10s	120	0.6	30	2024-06-27	13:20:57	2024-12-31	12:20:57	2024:06:30	2024-06-30	20:25:17	5.346	C033	Potamochoerus porcus	4.5	-20	DF	394.703	1701.99	Koto	3302.8	2024-06-30 20:25:17	2024-06-27 13:20:57	2024-12-31 12:20:57	1	266	0.333	33.028
C:\Users\user-1\Desktop\My_PHD\5_Redaction_These\Chap2_Metabarcoding & Census\Census\1_Data_Collection\Dossier5\C033\Potamochoerus porcus\DSCF0027.JPG	DSCF0027.JPG	403721	769978	GardePro	10s	120	0.6	30	2024-06-27	13:20:57	2024-12-31	12:20:57	2024:06:30	2024-06-30	20:25:22	5.347	C033	Potamochoerus porcus	4.5	-20	DF	394.703	1701.99	Koto	3302.8	2024-06-30 20:25:22	2024-06-27 13:20:57	2024-12-31 12:20:57	1	267	0.333	33.028
C:\Users\user-1\Desktop\My_PHD\5_Redaction_These\Chap2_Metabarcoding & Census\Census\1_Data_Collection\Dossier5\C033\Potamochoerus porcus\DSCF0027.JPG	DSCF0027.JPG	403721	769978	GardePro	10s	120	0.6	30	2024-06-27	13:20:57	2024-12-31	12:20:57	2024:06:30	2024-06-30	20:25:22	5.347	C033	Potamochoerus porcus	4.5	-20	DF	394.703	1701.99	Koto	3302.8	2024-06-30 20:25:22	2024-06-27 13:20:57	2024-12-31 12:20:57	1	268	0.333	33.028
C:\Users\user-1\Desktop\My_PHD\5_Redaction_These\Chap2_Metabarcoding & Census\Census\1_Data_Collection\Dossier5\C033\Potamochoerus porcus\DSCF0027.JPG	DSCF0027.JPG	403721	769978	GardePro	10s	120	0.6	30	2024-06-27	13:20:57	2024-12-31	12:20:57	2024:06:30	2024-06-30	20:25:22	5.347	C033	Potamochoerus porcus	4.5	-20	DF	394.703	1701.99	Koto	3302.8	2024-06-30 20:25:22	2024-06-27 13:20:57	2024-12-31 12:20:57	1	269	0.333	33.028
C:\Users\user-1\Desktop\My_PHD\5_Redaction_These\Chap2_Metabarcoding & Census\Census\1_Data_Collection\Dossier5\C033\Potamochoerus porcus\DSCF0027.JPG	DSCF0027.JPG	403721	769978	GardePro	10s	120	0.6	30	2024-06-27	13:20:57	2024-12-31	12:20:57	2024:06:30	2024-06-30	20:25:22	5.347	C033	Potamochoerus porcus	4.5	-20	DF	394.703	1701.99	Koto	3302.8	2024-06-30 20:25:22	2024-06-27 13:20:57	2024-12-31 12:20:57	1	270	0.333	33.028
C:\Users\user-1\Desktop\My_PHD\5_Redaction_These\Chap2_Metabarcoding & Census\Census\1_Data_Collection\Dossier5\C033\Potamochoerus porcus\DSCF0028.JPG	DSCF0028.JPG	403721	769978	GardePro	10s	120	0.6	30	2024-06-27	13:20:57	2024-12-31	12:20:57	2024:06:30	2024-06-30	20:25:22	5.347	C033	Potamochoerus porcus	4.5	-20	DF	394.703	1701.99	Koto	3302.8	2024-06-30 20:25:22	2024-06-27 13:20:57	2024-12-31 12:20:57	1	271	0.333	33.028
C:\Users\user-1\Desktop\My_PHD\5_Redaction_These\Chap2_Metabarcoding & Census\Census\1_Data_Collection\Dossier5\C033\Potamochoerus porcus\DSCF0028.JPG	DSCF0028.JPG	403721	769978	GardePro	10s	120	0.6	30	2024-06-27	13:20:57	2024-12-31	12:20:57	2024:06:30	2024-06-30	20:25:22	5.347	C033	Potamochoerus porcus	4.5	-20	DF	394.703	1701.99	Koto	3302.8	2024-06-30 20:25:22	2024-06-27 13:20:57	2024-12-31 12:20:57	1	272	0.333	33.028
C:\Users\user-1\Desktop\My_PHD\5_Redaction_These\Chap2_Metabarcoding & Census\Census\1_Data_Collection\Dossier5\C033\Potamochoerus porcus\DSCF0028.JPG	DSCF0028.JPG	403721	769978	GardePro	10s	120	0.6	30	2024-06-27	13:20:57	2024-12-31	12:20:57	2024:06:30	2024-06-30	20:25:22	5.347	C033	Potamochoerus porcus	4.5	-20	DF	394.703	1701.99	Koto	3302.8	2024-06-30 20:25:22	2024-06-27 13:20:57	2024-12-31 12:20:57	1	273	0.333	33.028
C:\Users\user-1\Desktop\My_PHD\5_Redaction_These\Chap2_Metabarcoding & Census\Census\1_Data_Collection\Dossier5\C033\Potamochoerus porcus\DSCF0028.JPG	DSCF0028.JPG	403721	769978	GardePro	10s	120	0.6	30	2024-06-27	13:20:57	2024-12-31	12:20:57	2024:06:30	2024-06-30	20:25:22	5.347	C033	Potamochoerus porcus	4.5	-20	DF	394.703	1701.99	Koto	3302.8	2024-06-30 20:25:22	2024-06-27 13:20:57	2024-12-31 12:20:57	1	274	0.333	33.028
C:\Users\user-1\Desktop\My_PHD\5_Redaction_These\Chap2_Metabarcoding & Census\Census\1_Data_Collection\Dossier5\C033\Potamochoerus porcus\DSCF0029.JPG	DSCF0029.JPG	403721	769978	GardePro	10s	120	0.6	30	2024-06-27	13:20:57	2024-12-31	12:20:57	2024:06:30	2024-06-30	20:25:27	5.347	C033	Potamochoerus porcus	4.5	-20	DF	394.703	1701.99	Koto	3302.8	2024-06-30 20:25:27	2024-06-27 13:20:57	2024-12-31 12:20:57	1	275	0.333	33.028
C:\Users\user-1\Desktop\My_PHD\5_Redaction_These\Chap2_Metabarcoding & Census\Census\1_Data_Collection\Dossier5\C033\Potamochoerus porcus\DSCF0029.JPG	DSCF0029.JPG	403721	769978	GardePro	10s	120	0.6	30	2024-06-27	13:20:57	2024-12-31	12:20:57	2024:06:30	2024-06-30	20:25:27	5.347	C033	Potamochoerus porcus	4.5	-20	DF	394.703	1701.99	Koto	3302.8	2024-06-30 20:25:27	2024-06-27 13:20:57	2024-12-31 12:20:57	1	276	0.333	33.028
C:\Users\user-1\Desktop\My_PHD\5_Redaction_These\Chap2_Metabarcoding & Census\Census\1_Data_Collection\Dossier5\C033\Potamochoerus porcus\DSCF0029.JPG	DSCF0029.JPG	403721	769978	GardePro	10s	120	0.6	30	2024-06-27	13:20:57	2024-12-31	12:20:57	2024:06:30	2024-06-30	20:25:27	5.347	C033	Potamochoerus porcus	4.5	-20	DF	394.703	1701.99	Koto	3302.8	2024-06-30 20:25:27	2024-06-27 13:20:57	2024-12-31 12:20:57	1	277	0.333	33.028
C:\Users\user-1\Desktop\My_PHD\5_Redaction_These\Chap2_Metabarcoding & Census\Census\1_Data_Collection\Dossier5\C033\Potamochoerus porcus\DSCF0029.JPG	DSCF0029.JPG	403721	769978	GardePro	10s	120	0.6	30	2024-06-27	13:20:57	2024-12-31	12:20:57	2024:06:30	2024-06-30	20:25:27	5.347	C033	Potamochoerus porcus	4.5	-20	DF	394.703	1701.99	Koto	3302.8	2024-06-30 20:25:27	2024-06-27 13:20:57	2024-12-31 12:20:57	1	278	0.333	33.028
C:\Users\user-1\Desktop\My_PHD\5_Redaction_These\Chap2_Metabarcoding & Census\Census\1_Data_Collection\Dossier5\C033\Potamochoerus porcus\DSCF0030.JPG	DSCF0030.JPG	403721	769978	GardePro	10s	120	0.6	30	2024-06-27	13:20:57	2024-12-31	12:20:57	2024:06:30	2024-06-30	20:25:27	5.347	C033	Potamochoerus porcus	4.5	-30	DF	394.703	1701.99	Koto	3302.8	2024-06-30 20:25:27	2024-06-27 13:20:57	2024-12-31 12:20:57	1	279	0.333	33.028
C:\Users\user-1\Desktop\My_PHD\5_Redaction_These\Chap2_Metabarcoding & Census\Census\1_Data_Collection\Dossier5\C033\Potamochoerus porcus\DSCF0030.JPG	DSCF0030.JPG	403721	769978	GardePro	10s	120	0.6	30	2024-06-27	13:20:57	2024-12-31	12:20:57	2024:06:30	2024-06-30	20:25:27	5.347	C033	Potamochoerus porcus	4.5	-30	DF	394.703	1701.99	Koto	3302.8	2024-06-30 20:25:27	2024-06-27 13:20:57	2024-12-31 12:20:57	1	280	0.333	33.028
C:\Users\user-1\Desktop\My_PHD\5_Redaction_These\Chap2_Metabarcoding & Census\Census\1_Data_Collection\Dossier5\C033\Potamochoerus porcus\DSCF0030.JPG	DSCF0030.JPG	403721	769978	GardePro	10s	120	0.6	30	2024-06-27	13:20:57	2024-12-31	12:20:57	2024:06:30	2024-06-30	20:25:27	5.347	C033	Potamochoerus porcus	4.5	-30	DF	394.703	1701.99	Koto	3302.8	2024-06-30 20:25:27	2024-06-27 13:20:57	2024-12-31 12:20:57	1	281	0.333	33.028
C:\Users\user-1\Desktop\My_PHD\5_Redaction_These\Chap2_Metabarcoding & Census\Census\1_Data_Collection\Dossier5\C033\Potamochoerus porcus\DSCF0030.JPG	DSCF0030.JPG	403721	769978	GardePro	10s	120	0.6	30	2024-06-27	13:20:57	2024-12-31	12:20:57	2024:06:30	2024-06-30	20:25:27	5.347	C033	Potamochoerus porcus	4.5	-30	DF	394.703	1701.99	Koto	3302.8	2024-06-30 20:25:27	2024-06-27 13:20:57	2024-12-31 12:20:57	1	282	0.333	33.028
C:\Users\user-1\Desktop\My_PHD\5_Redaction_These\Chap2_Metabarcoding & Census\Census\1_Data_Collection\Dossier5\C033\Potamochoerus porcus\DSCF0031.JPG	DSCF0031.JPG	403721	769978	GardePro	10s	120	0.6	30	2024-06-27	13:20:57	2024-12-31	12:20:57	2024:06:30	2024-06-30	20:25:33	5.347	C033	Potamochoerus porcus	4.5	-30	DF	394.703	1701.99	Koto	3302.8	2024-06-30 20:25:33	2024-06-27 13:20:57	2024-12-31 12:20:57	1	283	0.333	33.028
C:\Users\user-1\Desktop\My_PHD\5_Redaction_These\Chap2_Metabarcoding & Census\Census\1_Data_Collection\Dossier5\C033\Potamochoerus porcus\DSCF0031.JPG	DSCF0031.JPG	403721	769978	GardePro	10s	120	0.6	30	2024-06-27	13:20:57	2024-12-31	12:20:57	2024:06:30	2024-06-30	20:25:33	5.347	C033	Potamochoerus porcus	4.5	-30	DF	394.703	1701.99	Koto	3302.8	2024-06-30 20:25:33	2024-06-27 13:20:57	2024-12-31 12:20:57	1	284	0.333	33.028
C:\Users\user-1\Desktop\My_PHD\5_Redaction_These\Chap2_Metabarcoding & Census\Census\1_Data_Collection\Dossier5\C033\Potamochoerus porcus\DSCF0031.JPG	DSCF0031.JPG	403721	769978	GardePro	10s	120	0.6	30	2024-06-27	13:20:57	2024-12-31	12:20:57	2024:06:30	2024-06-30	20:25:33	5.347	C033	Potamochoerus porcus	4.5	-30	DF	394.703	1701.99	Koto	3302.8	2024-06-30 20:25:33	2024-06-27 13:20:57	2024-12-31 12:20:57	1	285	0.333	33.028
C:\Users\user-1\Desktop\My_PHD\5_Redaction_These\Chap2_Metabarcoding & Census\Census\1_Data_Collection\Dossier5\C033\Potamochoerus porcus\DSCF0031.JPG	DSCF0031.JPG	403721	769978	GardePro	10s	120	0.6	30	2024-06-27	13:20:57	2024-12-31	12:20:57	2024:06:30	2024-06-30	20:25:33	5.347	C033	Potamochoerus porcus	4.5	-30	DF	394.703	1701.99	Koto	3302.8	2024-06-30 20:25:33	2024-06-27 13:20:57	2024-12-31 12:20:57	1	286	0.333	33.028
C:\Users\user-1\Desktop\My_PHD\5_Redaction_These\Chap2_Metabarcoding & Census\Census\1_Data_Collection\Dossier5\C033\Potamochoerus porcus\DSCF0032.JPG	DSCF0032.JPG	403721	769978	GardePro	10s	120	0.6	30	2024-06-27	13:20:57	2024-12-31	12:20:57	2024:06:30	2024-06-30	20:25:33	5.347	C033	Potamochoerus porcus	4.5	-30	DF	394.703	1701.99	Koto	3302.8	2024-06-30 20:25:33	2024-06-27 13:20:57	2024-12-31 12:20:57	1	287	0.333	33.028
C:\Users\user-1\Desktop\My_PHD\5_Redaction_These\Chap2_Metabarcoding & Census\Census\1_Data_Collection\Dossier5\C033\Potamochoerus porcus\DSCF0032.JPG	DSCF0032.JPG	403721	769978	GardePro	10s	120	0.6	30	2024-06-27	13:20:57	2024-12-31	12:20:57	2024:06:30	2024-06-30	20:25:33	5.347	C033	Potamochoerus porcus	4.5	-30	DF	394.703	1701.99	Koto	3302.8	2024-06-30 20:25:33	2024-06-27 13:20:57	2024-12-31 12:20:57	1	288	0.333	33.028
C:\Users\user-1\Desktop\My_PHD\5_Redaction_These\Chap2_Metabarcoding & Census\Census\1_Data_Collection\Dossier5\C033\Potamochoerus porcus\DSCF0032.JPG	DSCF0032.JPG	403721	769978	GardePro	10s	120	0.6	30	2024-06-27	13:20:57	2024-12-31	12:20:57	2024:06:30	2024-06-30	20:25:33	5.347	C033	Potamochoerus porcus	4.5	-30	DF	394.703	1701.99	Koto	3302.8	2024-06-30 20:25:33	2024-06-27 13:20:57	2024-12-31 12:20:57	1	289	0.333	33.028
C:\Users\user-1\Desktop\My_PHD\5_Redaction_These\Chap2_Metabarcoding & Census\Census\1_Data_Collection\Dossier5\C033\Potamochoerus porcus\DSCF0032.JPG	DSCF0032.JPG	403721	769978	GardePro	10s	120	0.6	30	2024-06-27	13:20:57	2024-12-31	12:20:57	2024:06:30	2024-06-30	20:25:33	5.347	C033	Potamochoerus porcus	4.5	-30	DF	394.703	1701.99	Koto	3302.8	2024-06-30 20:25:33	2024-06-27 13:20:57	2024-12-31 12:20:57	1	290	0.333	33.028
C:\Users\user-1\Desktop\My_PHD\5_Redaction_These\Chap2_Metabarcoding & Census\Census\1_Data_Collection\Dossier5\C033\Potamochoerus porcus\DSCF0033.JPG	DSCF0033.JPG	403721	769978	GardePro	10s	120	0.6	30	2024-06-27	13:20:57	2024-12-31	12:20:57	2024:06:30	2024-06-30	20:25:41	5.348	C033	Potamochoerus porcus	4.5	-30	DF	394.703	1701.99	Koto	3302.8	2024-06-30 20:25:41	2024-06-27 13:20:57	2024-12-31 12:20:57	1	291	0.333	33.028
C:\Users\user-1\Desktop\My_PHD\5_Redaction_These\Chap2_Metabarcoding & Census\Census\1_Data_Collection\Dossier5\C033\Potamochoerus porcus\DSCF0034.JPG	DSCF0034.JPG	403721	769978	GardePro	10s	120	0.6	30	2024-06-27	13:20:57	2024-12-31	12:20:57	2024:06:30	2024-06-30	20:25:41	5.348	C033	Potamochoerus porcus	4.5	-30	DF	394.703	1701.99	Koto	3302.8	2024-06-30 20:25:41	2024-06-27 13:20:57	2024-12-31 12:20:57	1	292	0.333	33.028
C:\Users\user-1\Desktop\My_PHD\5_Redaction_These\Chap2_Metabarcoding & Census\Census\1_Data_Collection\Dossier5\C033\Potamochoerus porcus\DSCF0034.JPG	DSCF0034.JPG	403721	769978	GardePro	10s	120	0.6	30	2024-06-27	13:20:57	2024-12-31	12:20:57	2024:06:30	2024-06-30	20:25:41	5.348	C033	Potamochoerus porcus	4.5	-30	DF	394.703	1701.99	Koto	3302.8	2024-06-30 20:25:41	2024-06-27 13:20:57	2024-12-31 12:20:57	1	293	0.333	33.028
C:\Users\user-1\Desktop\My_PHD\5_Redaction_These\Chap2_Metabarcoding & Census\Census\1_Data_Collection\Dossier5\C033\Potamochoerus porcus\DSCF0034.JPG	DSCF0034.JPG	403721	769978	GardePro	10s	120	0.6	30	2024-06-27	13:20:57	2024-12-31	12:20:57	2024:06:30	2024-06-30	20:25:41	5.348	C033	Potamochoerus porcus	4.5	-30	DF	394.703	1701.99	Koto	3302.8	2024-06-30 20:25:41	2024-06-27 13:20:57	2024-12-31 12:20:57	1	294	0.333	33.028
C:\Users\user-1\Desktop\My_PHD\5_Redaction_These\Chap2_Metabarcoding & Census\Census\1_Data_Collection\Dossier5\C033\Potamochoerus porcus\DSCF0034.JPG	DSCF0034.JPG	403721	769978	GardePro	10s	120	0.6	30	2024-06-27	13:20:57	2024-12-31	12:20:57	2024:06:30	2024-06-30	20:25:41	5.348	C033	Potamochoerus porcus	4.5	-30	DF	394.703	1701.99	Koto	3302.8	2024-06-30 20:25:41	2024-06-27 13:20:57	2024-12-31 12:20:57	1	295	0.333	33.028
C:\Users\user-1\Desktop\My_PHD\5_Redaction_These\Chap2_Metabarcoding & Census\Census\1_Data_Collection\Dossier5\C033\Potamochoerus porcus\DSCF0035.JPG	DSCF0035.JPG	403721	769978	GardePro	10s	120	0.6	30	2024-06-27	13:20:57	2024-12-31	12:20:57	2024:06:30	2024-06-30	20:25:46	5.348	C033	Potamochoerus porcus	4.5	-30	DF	394.703	1701.99	Koto	3302.8	2024-06-30 20:25:46	2024-06-27 13:20:57	2024-12-31 12:20:57	1	296	0.333	33.028
C:\Users\user-1\Desktop\My_PHD\5_Redaction_These\Chap2_Metabarcoding & Census\Census\1_Data_Collection\Dossier5\C033\Potamochoerus porcus\DSCF0035.JPG	DSCF0035.JPG	403721	769978	GardePro	10s	120	0.6	30	2024-06-27	13:20:57	2024-12-31	12:20:57	2024:06:30	2024-06-30	20:25:46	5.348	C033	Potamochoerus porcus	4.5	-30	DF	394.703	1701.99	Koto	3302.8	2024-06-30 20:25:46	2024-06-27 13:20:57	2024-12-31 12:20:57	1	297	0.333	33.028
C:\Users\user-1\Desktop\My_PHD\5_Redaction_These\Chap2_Metabarcoding & Census\Census\1_Data_Collection\Dossier5\C033\Potamochoerus porcus\DSCF0035.JPG	DSCF0035.JPG	403721	769978	GardePro	10s	120	0.6	30	2024-06-27	13:20:57	2024-12-31	12:20:57	2024:06:30	2024-06-30	20:25:46	5.348	C033	Potamochoerus porcus	4.5	-30	DF	394.703	1701.99	Koto	3302.8	2024-06-30 20:25:46	2024-06-27 13:20:57	2024-12-31 12:20:57	1	298	0.333	33.028
C:\Users\user-1\Desktop\My_PHD\5_Redaction_These\Chap2_Metabarcoding & Census\Census\1_Data_Collection\Dossier5\C033\Potamochoerus porcus\DSCF0035.JPG	DSCF0035.JPG	403721	769978	GardePro	10s	120	0.6	30	2024-06-27	13:20:57	2024-12-31	12:20:57	2024:06:30	2024-06-30	20:25:46	5.348	C033	Potamochoerus porcus	4.5	-30	DF	394.703	1701.99	Koto	3302.8	2024-06-30 20:25:46	2024-06-27 13:20:57	2024-12-31 12:20:57	1	299	0.333	33.028
C:\Users\user-1\Desktop\My_PHD\5_Redaction_These\Chap2_Metabarcoding & Census\Census\1_Data_Collection\Dossier5\C033\Potamochoerus porcus\DSCF0036.JPG	DSCF0036.JPG	403721	769978	GardePro	10s	120	0.6	30	2024-06-27	13:20:57	2024-12-31	12:20:57	2024:06:30	2024-06-30	20:25:46	5.348	C033	Potamochoerus porcus	4.5	-30	DF	394.703	1701.99	Koto	3302.8	2024-06-30 20:25:46	2024-06-27 13:20:57	2024-12-31 12:20:57	1	300	0.333	33.028
C:\Users\user-1\Desktop\My_PHD\5_Redaction_These\Chap2_Metabarcoding & Census\Census\1_Data_Collection\Dossier5\C033\Potamochoerus porcus\DSCF0036.JPG	DSCF0036.JPG	403721	769978	GardePro	10s	120	0.6	30	2024-06-27	13:20:57	2024-12-31	12:20:57	2024:06:30	2024-06-30	20:25:46	5.348	C033	Potamochoerus porcus	4.5	-30	DF	394.703	1701.99	Koto	3302.8	2024-06-30 20:25:46	2024-06-27 13:20:57	2024-12-31 12:20:57	1	301	0.333	33.028
C:\Users\user-1\Desktop\My_PHD\5_Redaction_These\Chap2_Metabarcoding & Census\Census\1_Data_Collection\Dossier5\C033\Potamochoerus porcus\DSCF0036.JPG	DSCF0036.JPG	403721	769978	GardePro	10s	120	0.6	30	2024-06-27	13:20:57	2024-12-31	12:20:57	2024:06:30	2024-06-30	20:25:46	5.348	C033	Potamochoerus porcus	4.5	-30	DF	394.703	1701.99	Koto	3302.8	2024-06-30 20:25:46	2024-06-27 13:20:57	2024-12-31 12:20:57	1	302	0.333	33.028
C:\Users\user-1\Desktop\My_PHD\5_Redaction_These\Chap2_Metabarcoding & Census\Census\1_Data_Collection\Dossier5\C033\Potamochoerus porcus\DSCF0036.JPG	DSCF0036.JPG	403721	769978	GardePro	10s	120	0.6	30	2024-06-27	13:20:57	2024-12-31	12:20:57	2024:06:30	2024-06-30	20:25:46	5.348	C033	Potamochoerus porcus	4.5	-30	DF	394.703	1701.99	Koto	3302.8	2024-06-30 20:25:46	2024-06-27 13:20:57	2024-12-31 12:20:57	1	303	0.333	33.028
C:\Users\user-1\Desktop\My_PHD\5_Redaction_These\Chap2_Metabarcoding & Census\Census\1_Data_Collection\Dossier5\C033\Potamochoerus porcus\DSCF0037.JPG	DSCF0037.JPG	403721	769978	GardePro	10s	120	0.6	30	2024-06-27	13:20:57	2024-12-31	12:20:57	2024:06:30	2024-06-30	20:25:51	5.349	C033	Potamochoerus porcus	4.5	-30	DF	394.703	1701.99	Koto	3302.8	2024-06-30 20:25:51	2024-06-27 13:20:57	2024-12-31 12:20:57	1	304	0.333	33.028
C:\Users\user-1\Desktop\My_PHD\5_Redaction_These\Chap2_Metabarcoding & Census\Census\1_Data_Collection\Dossier5\C033\Potamochoerus porcus\DSCF0037.JPG	DSCF0037.JPG	403721	769978	GardePro	10s	120	0.6	30	2024-06-27	13:20:57	2024-12-31	12:20:57	2024:06:30	2024-06-30	20:25:51	5.349	C033	Potamochoerus porcus	4.5	-30	DF	394.703	1701.99	Koto	3302.8	2024-06-30 20:25:51	2024-06-27 13:20:57	2024-12-31 12:20:57	1	305	0.333	33.028
C:\Users\user-1\Desktop\My_PHD\5_Redaction_These\Chap2_Metabarcoding & Census\Census\1_Data_Collection\Dossier5\C033\Potamochoerus porcus\DSCF0037.JPG	DSCF0037.JPG	403721	769978	GardePro	10s	120	0.6	30	2024-06-27	13:20:57	2024-12-31	12:20:57	2024:06:30	2024-06-30	20:25:51	5.349	C033	Potamochoerus porcus	4.5	-30	DF	394.703	1701.99	Koto	3302.8	2024-06-30 20:25:51	2024-06-27 13:20:57	2024-12-31 12:20:57	1	306	0.333	33.028
C:\Users\user-1\Desktop\My_PHD\5_Redaction_These\Chap2_Metabarcoding & Census\Census\1_Data_Collection\Dossier5\C033\Potamochoerus porcus\DSCF0037.JPG	DSCF0037.JPG	403721	769978	GardePro	10s	120	0.6	30	2024-06-27	13:20:57	2024-12-31	12:20:57	2024:06:30	2024-06-30	20:25:51	5.349	C033	Potamochoerus porcus	4.5	-30	DF	394.703	1701.99	Koto	3302.8	2024-06-30 20:25:51	2024-06-27 13:20:57	2024-12-31 12:20:57	1	307	0.333	33.028
C:\Users\user-1\Desktop\My_PHD\5_Redaction_These\Chap2_Metabarcoding & Census\Census\1_Data_Collection\Dossier5\C033\Potamochoerus porcus\DSCF0038.JPG	DSCF0038.JPG	403721	769978	GardePro	10s	120	0.6	30	2024-06-27	13:20:57	2024-12-31	12:20:57	2024:06:30	2024-06-30	20:25:51	5.349	C033	Potamochoerus porcus	4.5	-30	DF	394.703	1701.99	Koto	3302.8	2024-06-30 20:25:51	2024-06-27 13:20:57	2024-12-31 12:20:57	1	308	0.333	33.028
C:\Users\user-1\Desktop\My_PHD\5_Redaction_These\Chap2_Metabarcoding & Census\Census\1_Data_Collection\Dossier5\C033\Potamochoerus porcus\DSCF0038.JPG	DSCF0038.JPG	403721	769978	GardePro	10s	120	0.6	30	2024-06-27	13:20:57	2024-12-31	12:20:57	2024:06:30	2024-06-30	20:25:51	5.349	C033	Potamochoerus porcus	4.5	-30	DF	394.703	1701.99	Koto	3302.8	2024-06-30 20:25:51	2024-06-27 13:20:57	2024-12-31 12:20:57	1	309	0.333	33.028
C:\Users\user-1\Desktop\My_PHD\5_Redaction_These\Chap2_Metabarcoding & Census\Census\1_Data_Collection\Dossier5\C033\Potamochoerus porcus\DSCF0038.JPG	DSCF0038.JPG	403721	769978	GardePro	10s	120	0.6	30	2024-06-27	13:20:57	2024-12-31	12:20:57	2024:06:30	2024-06-30	20:25:51	5.349	C033	Potamochoerus porcus	4.5	-30	DF	394.703	1701.99	Koto	3302.8	2024-06-30 20:25:51	2024-06-27 13:20:57	2024-12-31 12:20:57	1	310	0.333	33.028
C:\Users\user-1\Desktop\My_PHD\5_Redaction_These\Chap2_Metabarcoding & Census\Census\1_Data_Collection\Dossier5\C033\Potamochoerus porcus\DSCF0038.JPG	DSCF0038.JPG	403721	769978	GardePro	10s	120	0.6	30	2024-06-27	13:20:57	2024-12-31	12:20:57	2024:06:30	2024-06-30	20:25:51	5.349	C033	Potamochoerus porcus	4.5	-30	DF	394.703	1701.99	Koto	3302.8	2024-06-30 20:25:51	2024-06-27 13:20:57	2024-12-31 12:20:57	1	311	0.333	33.028
C:\Users\user-1\Desktop\My_PHD\5_Redaction_These\Chap2_Metabarcoding & Census\Census\1_Data_Collection\Dossier5\C033\Potamochoerus porcus\DSCF0039.JPG	DSCF0039.JPG	403721	769978	GardePro	10s	120	0.6	30	2024-06-27	13:20:57	2024-12-31	12:20:57	2024:06:30	2024-06-30	20:25:56	5.349	C033	Potamochoerus porcus	4.5	-30	DF	394.703	1701.99	Koto	3302.8	2024-06-30 20:25:56	2024-06-27 13:20:57	2024-12-31 12:20:57	1	312	0.333	33.028
C:\Users\user-1\Desktop\My_PHD\5_Redaction_These\Chap2_Metabarcoding & Census\Census\1_Data_Collection\Dossier5\C033\Potamochoerus porcus\DSCF0039.JPG	DSCF0039.JPG	403721	769978	GardePro	10s	120	0.6	30	2024-06-27	13:20:57	2024-12-31	12:20:57	2024:06:30	2024-06-30	20:25:56	5.349	C033	Potamochoerus porcus	4.5	-30	DF	394.703	1701.99	Koto	3302.8	2024-06-30 20:25:56	2024-06-27 13:20:57	2024-12-31 12:20:57	1	313	0.333	33.028
C:\Users\user-1\Desktop\My_PHD\5_Redaction_These\Chap2_Metabarcoding & Census\Census\1_Data_Collection\Dossier5\C033\Potamochoerus porcus\DSCF0039.JPG	DSCF0039.JPG	403721	769978	GardePro	10s	120	0.6	30	2024-06-27	13:20:57	2024-12-31	12:20:57	2024:06:30	2024-06-30	20:25:56	5.349	C033	Potamochoerus porcus	4.5	-30	DF	394.703	1701.99	Koto	3302.8	2024-06-30 20:25:56	2024-06-27 13:20:57	2024-12-31 12:20:57	1	314	0.333	33.028
C:\Users\user-1\Desktop\My_PHD\5_Redaction_These\Chap2_Metabarcoding & Census\Census\1_Data_Collection\Dossier5\C033\Potamochoerus porcus\DSCF0039.JPG	DSCF0039.JPG	403721	769978	GardePro	10s	120	0.6	30	2024-06-27	13:20:57	2024-12-31	12:20:57	2024:06:30	2024-06-30	20:25:56	5.349	C033	Potamochoerus porcus	4.5	-30	DF	394.703	1701.99	Koto	3302.8	2024-06-30 20:25:56	2024-06-27 13:20:57	2024-12-31 12:20:57	1	315	0.333	33.028
C:\Users\user-1\Desktop\My_PHD\5_Redaction_These\Chap2_Metabarcoding & Census\Census\1_Data_Collection\Dossier5\C033\Potamochoerus porcus\DSCF0040.JPG	DSCF0040.JPG	403721	769978	GardePro	10s	120	0.6	30	2024-06-27	13:20:57	2024-12-31	12:20:57	2024:06:30	2024-06-30	20:25:56	5.349	C033	Potamochoerus porcus	4.5	-30	DF	394.703	1701.99	Koto	3302.8	2024-06-30 20:25:56	2024-06-27 13:20:57	2024-12-31 12:20:57	1	316	0.333	33.028
C:\Users\user-1\Desktop\My_PHD\5_Redaction_These\Chap2_Metabarcoding & Census\Census\1_Data_Collection\Dossier5\C033\Potamochoerus porcus\DSCF0040.JPG	DSCF0040.JPG	403721	769978	GardePro	10s	120	0.6	30	2024-06-27	13:20:57	2024-12-31	12:20:57	2024:06:30	2024-06-30	20:25:56	5.349	C033	Potamochoerus porcus	4.5	-30	DF	394.703	1701.99	Koto	3302.8	2024-06-30 20:25:56	2024-06-27 13:20:57	2024-12-31 12:20:57	1	317	0.333	33.028
C:\Users\user-1\Desktop\My_PHD\5_Redaction_These\Chap2_Metabarcoding & Census\Census\1_Data_Collection\Dossier5\C033\Potamochoerus porcus\DSCF0040.JPG	DSCF0040.JPG	403721	769978	GardePro	10s	120	0.6	30	2024-06-27	13:20:57	2024-12-31	12:20:57	2024:06:30	2024-06-30	20:25:56	5.349	C033	Potamochoerus porcus	4.5	-30	DF	394.703	1701.99	Koto	3302.8	2024-06-30 20:25:56	2024-06-27 13:20:57	2024-12-31 12:20:57	1	318	0.333	33.028
C:\Users\user-1\Desktop\My_PHD\5_Redaction_These\Chap2_Metabarcoding & Census\Census\1_Data_Collection\Dossier5\C033\Potamochoerus porcus\DSCF0040.JPG	DSCF0040.JPG	403721	769978	GardePro	10s	120	0.6	30	2024-06-27	13:20:57	2024-12-31	12:20:57	2024:06:30	2024-06-30	20:25:56	5.349	C033	Potamochoerus porcus	4.5	-30	DF	394.703	1701.99	Koto	3302.8	2024-06-30 20:25:56	2024-06-27 13:20:57	2024-12-31 12:20:57	1	319	0.333	33.028
C:\Users\user-1\Desktop\My_PHD\5_Redaction_These\Chap2_Metabarcoding & Census\Census\1_Data_Collection\Dossier5\C033\Potamochoerus porcus\DSCF0041.JPG	DSCF0041.JPG	403721	769978	GardePro	10s	120	0.6	30	2024-06-27	13:20:57	2024-12-31	12:20:57	2024:06:30	2024-06-30	20:26:04	5.35	C033	Potamochoerus porcus	4.5	-30	DF	394.703	1701.99	Koto	3302.8	2024-06-30 20:26:04	2024-06-27 13:20:57	2024-12-31 12:20:57	1	320	0.333	33.028
C:\Users\user-1\Desktop\My_PHD\5_Redaction_These\Chap2_Metabarcoding & Census\Census\1_Data_Collection\Dossier5\C033\Potamochoerus porcus\DSCF0041.JPG	DSCF0041.JPG	403721	769978	GardePro	10s	120	0.6	30	2024-06-27	13:20:57	2024-12-31	12:20:57	2024:06:30	2024-06-30	20:26:04	5.35	C033	Potamochoerus porcus	4.5	-30	DF	394.703	1701.99	Koto	3302.8	2024-06-30 20:26:04	2024-06-27 13:20:57	2024-12-31 12:20:57	1	321	0.333	33.028
C:\Users\user-1\Desktop\My_PHD\5_Redaction_These\Chap2_Metabarcoding & Census\Census\1_Data_Collection\Dossier5\C033\Potamochoerus porcus\DSCF0041.JPG	DSCF0041.JPG	403721	769978	GardePro	10s	120	0.6	30	2024-06-27	13:20:57	2024-12-31	12:20:57	2024:06:30	2024-06-30	20:26:04	5.35	C033	Potamochoerus porcus	4.5	-30	DF	394.703	1701.99	Koto	3302.8	2024-06-30 20:26:04	2024-06-27 13:20:57	2024-12-31 12:20:57	1	322	0.333	33.028
C:\Users\user-1\Desktop\My_PHD\5_Redaction_These\Chap2_Metabarcoding & Census\Census\1_Data_Collection\Dossier5\C033\Potamochoerus porcus\DSCF0041.JPG	DSCF0041.JPG	403721	769978	GardePro	10s	120	0.6	30	2024-06-27	13:20:57	2024-12-31	12:20:57	2024:06:30	2024-06-30	20:26:04	5.35	C033	Potamochoerus porcus	4.5	-30	DF	394.703	1701.99	Koto	3302.8	2024-06-30 20:26:04	2024-06-27 13:20:57	2024-12-31 12:20:57	1	323	0.333	33.028
C:\Users\user-1\Desktop\My_PHD\5_Redaction_These\Chap2_Metabarcoding & Census\Census\1_Data_Collection\Dossier5\C033\Potamochoerus porcus\DSCF0042.JPG	DSCF0042.JPG	403721	769978	GardePro	10s	120	0.6	30	2024-06-27	13:20:57	2024-12-31	12:20:57	2024:06:30	2024-06-30	20:26:04	5.35	C033	Potamochoerus porcus	4.5	-30	DF	394.703	1701.99	Koto	3302.8	2024-06-30 20:26:04	2024-06-27 13:20:57	2024-12-31 12:20:57	1	324	0.333	33.028
C:\Users\user-1\Desktop\My_PHD\5_Redaction_These\Chap2_Metabarcoding & Census\Census\1_Data_Collection\Dossier5\C033\Potamochoerus porcus\DSCF0042.JPG	DSCF0042.JPG	403721	769978	GardePro	10s	120	0.6	30	2024-06-27	13:20:57	2024-12-31	12:20:57	2024:06:30	2024-06-30	20:26:04	5.35	C033	Potamochoerus porcus	4.5	-30	DF	394.703	1701.99	Koto	3302.8	2024-06-30 20:26:04	2024-06-27 13:20:57	2024-12-31 12:20:57	1	325	0.333	33.028
C:\Users\user-1\Desktop\My_PHD\5_Redaction_These\Chap2_Metabarcoding & Census\Census\1_Data_Collection\Dossier5\C033\Potamochoerus porcus\DSCF0042.JPG	DSCF0042.JPG	403721	769978	GardePro	10s	120	0.6	30	2024-06-27	13:20:57	2024-12-31	12:20:57	2024:06:30	2024-06-30	20:26:04	5.35	C033	Potamochoerus porcus	4.5	-30	DF	394.703	1701.99	Koto	3302.8	2024-06-30 20:26:04	2024-06-27 13:20:57	2024-12-31 12:20:57	1	326	0.333	33.028
C:\Users\user-1\Desktop\My_PHD\5_Redaction_These\Chap2_Metabarcoding & Census\Census\1_Data_Collection\Dossier5\C033\Potamochoerus porcus\DSCF0042.JPG	DSCF0042.JPG	403721	769978	GardePro	10s	120	0.6	30	2024-06-27	13:20:57	2024-12-31	12:20:57	2024:06:30	2024-06-30	20:26:04	5.35	C033	Potamochoerus porcus	4.5	-30	DF	394.703	1701.99	Koto	3302.8	2024-06-30 20:26:04	2024-06-27 13:20:57	2024-12-31 12:20:57	1	327	0.333	33.028
C:\Users\user-1\Desktop\My_PHD\5_Redaction_These\Chap2_Metabarcoding & Census\Census\1_Data_Collection\Dossier5\C033\Potamochoerus porcus\DSCF0043.JPG	DSCF0043.JPG	403721	769978	GardePro	10s	120	0.6	30	2024-06-27	13:20:57	2024-12-31	12:20:57	2024:06:30	2024-06-30	20:26:12	5.35	C033	Potamochoerus porcus	4.5	-30	DF	394.703	1701.99	Koto	3302.8	2024-06-30 20:26:12	2024-06-27 13:20:57	2024-12-31 12:20:57	1	328	0.333	33.028
C:\Users\user-1\Desktop\My_PHD\5_Redaction_These\Chap2_Metabarcoding & Census\Census\1_Data_Collection\Dossier5\C033\Potamochoerus porcus\DSCF0043.JPG	DSCF0043.JPG	403721	769978	GardePro	10s	120	0.6	30	2024-06-27	13:20:57	2024-12-31	12:20:57	2024:06:30	2024-06-30	20:26:12	5.35	C033	Potamochoerus porcus	4.5	-30	DF	394.703	1701.99	Koto	3302.8	2024-06-30 20:26:12	2024-06-27 13:20:57	2024-12-31 12:20:57	1	329	0.333	33.028
C:\Users\user-1\Desktop\My_PHD\5_Redaction_These\Chap2_Metabarcoding & Census\Census\1_Data_Collection\Dossier5\C033\Potamochoerus porcus\DSCF0043.JPG	DSCF0043.JPG	403721	769978	GardePro	10s	120	0.6	30	2024-06-27	13:20:57	2024-12-31	12:20:57	2024:06:30	2024-06-30	20:26:12	5.35	C033	Potamochoerus porcus	4.5	-30	DF	394.703	1701.99	Koto	3302.8	2024-06-30 20:26:12	2024-06-27 13:20:57	2024-12-31 12:20:57	1	330	0.333	33.028
C:\Users\user-1\Desktop\My_PHD\5_Redaction_These\Chap2_Metabarcoding & Census\Census\1_Data_Collection\Dossier5\C033\Potamochoerus porcus\DSCF0043.JPG	DSCF0043.JPG	403721	769978	GardePro	10s	120	0.6	30	2024-06-27	13:20:57	2024-12-31	12:20:57	2024:06:30	2024-06-30	20:26:12	5.35	C033	Potamochoerus porcus	4.5	-30	DF	394.703	1701.99	Koto	3302.8	2024-06-30 20:26:12	2024-06-27 13:20:57	2024-12-31 12:20:57	1	331	0.333	33.028
C:\Users\user-1\Desktop\My_PHD\5_Redaction_These\Chap2_Metabarcoding & Census\Census\1_Data_Collection\Dossier5\C033\Potamochoerus porcus\DSCF0044.JPG	DSCF0044.JPG	403721	769978	GardePro	10s	120	0.6	30	2024-06-27	13:20:57	2024-12-31	12:20:57	2024:06:30	2024-06-30	20:26:12	5.35	C033	Potamochoerus porcus	4.5	-30	DF	394.703	1701.99	Koto	3302.8	2024-06-30 20:26:12	2024-06-27 13:20:57	2024-12-31 12:20:57	1	332	0.333	33.028
C:\Users\user-1\Desktop\My_PHD\5_Redaction_These\Chap2_Metabarcoding & Census\Census\1_Data_Collection\Dossier5\C033\Potamochoerus porcus\DSCF0044.JPG	DSCF0044.JPG	403721	769978	GardePro	10s	120	0.6	30	2024-06-27	13:20:57	2024-12-31	12:20:57	2024:06:30	2024-06-30	20:26:12	5.35	C033	Potamochoerus porcus	4.5	-30	DF	394.703	1701.99	Koto	3302.8	2024-06-30 20:26:12	2024-06-27 13:20:57	2024-12-31 12:20:57	1	333	0.333	33.028
C:\Users\user-1\Desktop\My_PHD\5_Redaction_These\Chap2_Metabarcoding & Census\Census\1_Data_Collection\Dossier5\C033\Potamochoerus porcus\DSCF0044.JPG	DSCF0044.JPG	403721	769978	GardePro	10s	120	0.6	30	2024-06-27	13:20:57	2024-12-31	12:20:57	2024:06:30	2024-06-30	20:26:12	5.35	C033	Potamochoerus porcus	4.5	-30	DF	394.703	1701.99	Koto	3302.8	2024-06-30 20:26:12	2024-06-27 13:20:57	2024-12-31 12:20:57	1	334	0.333	33.028
C:\Users\user-1\Desktop\My_PHD\5_Redaction_These\Chap2_Metabarcoding & Census\Census\1_Data_Collection\Dossier5\C033\Potamochoerus porcus\DSCF0044.JPG	DSCF0044.JPG	403721	769978	GardePro	10s	120	0.6	30	2024-06-27	13:20:57	2024-12-31	12:20:57	2024:06:30	2024-06-30	20:26:12	5.35	C033	Potamochoerus porcus	4.5	-30	DF	394.703	1701.99	Koto	3302.8	2024-06-30 20:26:12	2024-06-27 13:20:57	2024-12-31 12:20:57	1	335	0.333	33.028
C:\Users\user-1\Desktop\My_PHD\5_Redaction_These\Chap2_Metabarcoding & Census\Census\1_Data_Collection\Dossier5\C033\Potamochoerus porcus\DSCF0045.JPG	DSCF0045.JPG	403721	769978	GardePro	10s	120	0.6	30	2024-06-27	13:20:57	2024-12-31	12:20:57	2024:06:30	2024-06-30	20:26:19	5.351	C033	Potamochoerus porcus	4.5	-30	DF	394.703	1701.99	Koto	3302.8	2024-06-30 20:26:19	2024-06-27 13:20:57	2024-12-31 12:20:57	1	336	0.333	33.028
C:\Users\user-1\Desktop\My_PHD\5_Redaction_These\Chap2_Metabarcoding & Census\Census\1_Data_Collection\Dossier5\C033\Potamochoerus porcus\DSCF0045.JPG	DSCF0045.JPG	403721	769978	GardePro	10s	120	0.6	30	2024-06-27	13:20:57	2024-12-31	12:20:57	2024:06:30	2024-06-30	20:26:19	5.351	C033	Potamochoerus porcus	4.5	-30	DF	394.703	1701.99	Koto	3302.8	2024-06-30 20:26:19	2024-06-27 13:20:57	2024-12-31 12:20:57	1	337	0.333	33.028
C:\Users\user-1\Desktop\My_PHD\5_Redaction_These\Chap2_Metabarcoding & Census\Census\1_Data_Collection\Dossier5\C033\Potamochoerus porcus\DSCF0045.JPG	DSCF0045.JPG	403721	769978	GardePro	10s	120	0.6	30	2024-06-27	13:20:57	2024-12-31	12:20:57	2024:06:30	2024-06-30	20:26:19	5.351	C033	Potamochoerus porcus	4.5	-30	DF	394.703	1701.99	Koto	3302.8	2024-06-30 20:26:19	2024-06-27 13:20:57	2024-12-31 12:20:57	1	338	0.333	33.028
C:\Users\user-1\Desktop\My_PHD\5_Redaction_These\Chap2_Metabarcoding & Census\Census\1_Data_Collection\Dossier5\C033\Potamochoerus porcus\DSCF0045.JPG	DSCF0045.JPG	403721	769978	GardePro	10s	120	0.6	30	2024-06-27	13:20:57	2024-12-31	12:20:57	2024:06:30	2024-06-30	20:26:19	5.351	C033	Potamochoerus porcus	4.5	-30	DF	394.703	1701.99	Koto	3302.8	2024-06-30 20:26:19	2024-06-27 13:20:57	2024-12-31 12:20:57	1	339	0.333	33.028
C:\Users\user-1\Desktop\My_PHD\5_Redaction_These\Chap2_Metabarcoding & Census\Census\1_Data_Collection\Dossier5\C033\Potamochoerus porcus\DSCF0046.JPG	DSCF0046.JPG	403721	769978	GardePro	10s	120	0.6	30	2024-06-27	13:20:57	2024-12-31	12:20:57	2024:06:30	2024-06-30	20:26:19	5.351	C033	Potamochoerus porcus	4.5	-30	DF	394.703	1701.99	Koto	3302.8	2024-06-30 20:26:19	2024-06-27 13:20:57	2024-12-31 12:20:57	1	340	0.333	33.028
C:\Users\user-1\Desktop\My_PHD\5_Redaction_These\Chap2_Metabarcoding & Census\Census\1_Data_Collection\Dossier5\C033\Potamochoerus porcus\DSCF0046.JPG	DSCF0046.JPG	403721	769978	GardePro	10s	120	0.6	30	2024-06-27	13:20:57	2024-12-31	12:20:57	2024:06:30	2024-06-30	20:26:19	5.351	C033	Potamochoerus porcus	4.5	-30	DF	394.703	1701.99	Koto	3302.8	2024-06-30 20:26:19	2024-06-27 13:20:57	2024-12-31 12:20:57	1	341	0.333	33.028
C:\Users\user-1\Desktop\My_PHD\5_Redaction_These\Chap2_Metabarcoding & Census\Census\1_Data_Collection\Dossier5\C033\Potamochoerus porcus\DSCF0046.JPG	DSCF0046.JPG	403721	769978	GardePro	10s	120	0.6	30	2024-06-27	13:20:57	2024-12-31	12:20:57	2024:06:30	2024-06-30	20:26:19	5.351	C033	Potamochoerus porcus	4.5	-30	DF	394.703	1701.99	Koto	3302.8	2024-06-30 20:26:19	2024-06-27 13:20:57	2024-12-31 12:20:57	1	342	0.333	33.028
C:\Users\user-1\Desktop\My_PHD\5_Redaction_These\Chap2_Metabarcoding & Census\Census\1_Data_Collection\Dossier5\C033\Potamochoerus porcus\DSCF0046.JPG	DSCF0046.JPG	403721	769978	GardePro	10s	120	0.6	30	2024-06-27	13:20:57	2024-12-31	12:20:57	2024:06:30	2024-06-30	20:26:19	5.351	C033	Potamochoerus porcus	4.5	-30	DF	394.703	1701.99	Koto	3302.8	2024-06-30 20:26:19	2024-06-27 13:20:57	2024-12-31 12:20:57	1	343	0.333	33.028
C:\Users\user-1\Desktop\My_PHD\5_Redaction_These\Chap2_Metabarcoding & Census\Census\1_Data_Collection\Dossier5\C033\Potamochoerus porcus\DSCF0047.JPG	DSCF0047.JPG	403721	769978	GardePro	10s	120	0.6	30	2024-06-27	13:20:57	2024-12-31	12:20:57	2024:06:30	2024-06-30	20:26:24	5.351	C033	Potamochoerus porcus	4.5	0	DF	394.703	1701.99	Koto	3302.8	2024-06-30 20:26:24	2024-06-27 13:20:57	2024-12-31 12:20:57	1	344	0.333	33.028
C:\Users\user-1\Desktop\My_PHD\5_Redaction_These\Chap2_Metabarcoding & Census\Census\1_Data_Collection\Dossier5\C033\Potamochoerus porcus\DSCF0047.JPG	DSCF0047.JPG	403721	769978	GardePro	10s	120	0.6	30	2024-06-27	13:20:57	2024-12-31	12:20:57	2024:06:30	2024-06-30	20:26:24	5.351	C033	Potamochoerus porcus	4.5	0	DF	394.703	1701.99	Koto	3302.8	2024-06-30 20:26:24	2024-06-27 13:20:57	2024-12-31 12:20:57	1	345	0.333	33.028
C:\Users\user-1\Desktop\My_PHD\5_Redaction_These\Chap2_Metabarcoding & Census\Census\1_Data_Collection\Dossier5\C033\Potamochoerus porcus\DSCF0047.JPG	DSCF0047.JPG	403721	769978	GardePro	10s	120	0.6	30	2024-06-27	13:20:57	2024-12-31	12:20:57	2024:06:30	2024-06-30	20:26:24	5.351	C033	Potamochoerus porcus	4.5	0	DF	394.703	1701.99	Koto	3302.8	2024-06-30 20:26:24	2024-06-27 13:20:57	2024-12-31 12:20:57	1	346	0.333	33.028
C:\Users\user-1\Desktop\My_PHD\5_Redaction_These\Chap2_Metabarcoding & Census\Census\1_Data_Collection\Dossier5\C033\Potamochoerus porcus\DSCF0047.JPG	DSCF0047.JPG	403721	769978	GardePro	10s	120	0.6	30	2024-06-27	13:20:57	2024-12-31	12:20:57	2024:06:30	2024-06-30	20:26:24	5.351	C033	Potamochoerus porcus	4.5	0	DF	394.703	1701.99	Koto	3302.8	2024-06-30 20:26:24	2024-06-27 13:20:57	2024-12-31 12:20:57	1	347	0.333	33.028
C:\Users\user-1\Desktop\My_PHD\5_Redaction_These\Chap2_Metabarcoding & Census\Census\1_Data_Collection\Dossier5\C033\Potamochoerus porcus\DSCF0048.JPG	DSCF0048.JPG	403721	769978	GardePro	10s	120	0.6	30	2024-06-27	13:20:57	2024-12-31	12:20:57	2024:06:30	2024-06-30	20:26:24	5.351	C033	Potamochoerus porcus	4.5	0	DF	394.703	1701.99	Koto	3302.8	2024-06-30 20:26:24	2024-06-27 13:20:57	2024-12-31 12:20:57	1	348	0.333	33.028
C:\Users\user-1\Desktop\My_PHD\5_Redaction_These\Chap2_Metabarcoding & Census\Census\1_Data_Collection\Dossier5\C033\Potamochoerus porcus\DSCF0048.JPG	DSCF0048.JPG	403721	769978	GardePro	10s	120	0.6	30	2024-06-27	13:20:57	2024-12-31	12:20:57	2024:06:30	2024-06-30	20:26:24	5.351	C033	Potamochoerus porcus	4.5	0	DF	394.703	1701.99	Koto	3302.8	2024-06-30 20:26:24	2024-06-27 13:20:57	2024-12-31 12:20:57	1	349	0.333	33.028
C:\Users\user-1\Desktop\My_PHD\5_Redaction_These\Chap2_Metabarcoding & Census\Census\1_Data_Collection\Dossier5\C033\Potamochoerus porcus\DSCF0048.JPG	DSCF0048.JPG	403721	769978	GardePro	10s	120	0.6	30	2024-06-27	13:20:57	2024-12-31	12:20:57	2024:06:30	2024-06-30	20:26:24	5.351	C033	Potamochoerus porcus	4.5	0	DF	394.703	1701.99	Koto	3302.8	2024-06-30 20:26:24	2024-06-27 13:20:57	2024-12-31 12:20:57	1	350	0.333	33.028
C:\Users\user-1\Desktop\My_PHD\5_Redaction_These\Chap2_Metabarcoding & Census\Census\1_Data_Collection\Dossier5\C033\Potamochoerus porcus\DSCF0048.JPG	DSCF0048.JPG	403721	769978	GardePro	10s	120	0.6	30	2024-06-27	13:20:57	2024-12-31	12:20:57	2024:06:30	2024-06-30	20:26:24	5.351	C033	Potamochoerus porcus	4.5	0	DF	394.703	1701.99	Koto	3302.8	2024-06-30 20:26:24	2024-06-27 13:20:57	2024-12-31 12:20:57	1	351	0.333	33.028
C:\Users\user-1\Desktop\My_PHD\5_Redaction_These\Chap2_Metabarcoding & Census\Census\1_Data_Collection\Dossier5\C033\Potamochoerus porcus\DSCF0049.JPG	DSCF0049.JPG	403721	769978	GardePro	10s	120	0.6	30	2024-06-27	13:20:57	2024-12-31	12:20:57	2024:06:30	2024-06-30	20:26:32	5.352	C033	Potamochoerus porcus	4.5	-10	DF	394.703	1701.99	Koto	3302.8	2024-06-30 20:26:32	2024-06-27 13:20:57	2024-12-31 12:20:57	1	352	0.333	33.028
C:\Users\user-1\Desktop\My_PHD\5_Redaction_These\Chap2_Metabarcoding & Census\Census\1_Data_Collection\Dossier5\C033\Potamochoerus porcus\DSCF0049.JPG	DSCF0049.JPG	403721	769978	GardePro	10s	120	0.6	30	2024-06-27	13:20:57	2024-12-31	12:20:57	2024:06:30	2024-06-30	20:26:32	5.352	C033	Potamochoerus porcus	4.5	-10	DF	394.703	1701.99	Koto	3302.8	2024-06-30 20:26:32	2024-06-27 13:20:57	2024-12-31 12:20:57	1	353	0.333	33.028
C:\Users\user-1\Desktop\My_PHD\5_Redaction_These\Chap2_Metabarcoding & Census\Census\1_Data_Collection\Dossier5\C033\Potamochoerus porcus\DSCF0049.JPG	DSCF0049.JPG	403721	769978	GardePro	10s	120	0.6	30	2024-06-27	13:20:57	2024-12-31	12:20:57	2024:06:30	2024-06-30	20:26:32	5.352	C033	Potamochoerus porcus	4.5	-10	DF	394.703	1701.99	Koto	3302.8	2024-06-30 20:26:32	2024-06-27 13:20:57	2024-12-31 12:20:57	1	354	0.333	33.028
C:\Users\user-1\Desktop\My_PHD\5_Redaction_These\Chap2_Metabarcoding & Census\Census\1_Data_Collection\Dossier5\C033\Potamochoerus porcus\DSCF0049.JPG	DSCF0049.JPG	403721	769978	GardePro	10s	120	0.6	30	2024-06-27	13:20:57	2024-12-31	12:20:57	2024:06:30	2024-06-30	20:26:32	5.352	C033	Potamochoerus porcus	4.5	-10	DF	394.703	1701.99	Koto	3302.8	2024-06-30 20:26:32	2024-06-27 13:20:57	2024-12-31 12:20:57	1	355	0.333	33.028
C:\Users\user-1\Desktop\My_PHD\5_Redaction_These\Chap2_Metabarcoding & Census\Census\1_Data_Collection\Dossier5\C033\Potamochoerus porcus\DSCF0050.JPG	DSCF0050.JPG	403721	769978	GardePro	10s	120	0.6	30	2024-06-27	13:20:57	2024-12-31	12:20:57	2024:06:30	2024-06-30	20:26:32	5.352	C033	Potamochoerus porcus	4.5	-10	DF	394.703	1701.99	Koto	3302.8	2024-06-30 20:26:32	2024-06-27 13:20:57	2024-12-31 12:20:57	1	356	0.333	33.028
C:\Users\user-1\Desktop\My_PHD\5_Redaction_These\Chap2_Metabarcoding & Census\Census\1_Data_Collection\Dossier5\C033\Potamochoerus porcus\DSCF0050.JPG	DSCF0050.JPG	403721	769978	GardePro	10s	120	0.6	30	2024-06-27	13:20:57	2024-12-31	12:20:57	2024:06:30	2024-06-30	20:26:32	5.352	C033	Potamochoerus porcus	4.5	-10	DF	394.703	1701.99	Koto	3302.8	2024-06-30 20:26:32	2024-06-27 13:20:57	2024-12-31 12:20:57	1	357	0.333	33.028
C:\Users\user-1\Desktop\My_PHD\5_Redaction_These\Chap2_Metabarcoding & Census\Census\1_Data_Collection\Dossier5\C033\Potamochoerus porcus\DSCF0050.JPG	DSCF0050.JPG	403721	769978	GardePro	10s	120	0.6	30	2024-06-27	13:20:57	2024-12-31	12:20:57	2024:06:30	2024-06-30	20:26:32	5.352	C033	Potamochoerus porcus	4.5	-10	DF	394.703	1701.99	Koto	3302.8	2024-06-30 20:26:32	2024-06-27 13:20:57	2024-12-31 12:20:57	1	358	0.333	33.028
C:\Users\user-1\Desktop\My_PHD\5_Redaction_These\Chap2_Metabarcoding & Census\Census\1_Data_Collection\Dossier5\C033\Potamochoerus porcus\DSCF0050.JPG	DSCF0050.JPG	403721	769978	GardePro	10s	120	0.6	30	2024-06-27	13:20:57	2024-12-31	12:20:57	2024:06:30	2024-06-30	20:26:32	5.352	C033	Potamochoerus porcus	4.5	-10	DF	394.703	1701.99	Koto	3302.8	2024-06-30 20:26:32	2024-06-27 13:20:57	2024-12-31 12:20:57	1	359	0.333	33.028
C:\Users\user-1\Desktop\My_PHD\5_Redaction_These\Chap2_Metabarcoding & Census\Census\1_Data_Collection\Dossier5\C033\Potamochoerus porcus\DSCF0051.JPG	DSCF0051.JPG	403721	769978	GardePro	10s	120	0.6	30	2024-06-27	13:20:57	2024-12-31	12:20:57	2024:06:30	2024-06-30	20:26:37	5.352	C033	Potamochoerus porcus	4.5	-30	DF	394.703	1701.99	Koto	3302.8	2024-06-30 20:26:37	2024-06-27 13:20:57	2024-12-31 12:20:57	1	360	0.333	33.028
C:\Users\user-1\Desktop\My_PHD\5_Redaction_These\Chap2_Metabarcoding & Census\Census\1_Data_Collection\Dossier5\C033\Potamochoerus porcus\DSCF0051.JPG	DSCF0051.JPG	403721	769978	GardePro	10s	120	0.6	30	2024-06-27	13:20:57	2024-12-31	12:20:57	2024:06:30	2024-06-30	20:26:37	5.352	C033	Potamochoerus porcus	4.5	-30	DF	394.703	1701.99	Koto	3302.8	2024-06-30 20:26:37	2024-06-27 13:20:57	2024-12-31 12:20:57	1	361	0.333	33.028
C:\Users\user-1\Desktop\My_PHD\5_Redaction_These\Chap2_Metabarcoding & Census\Census\1_Data_Collection\Dossier5\C033\Potamochoerus porcus\DSCF0051.JPG	DSCF0051.JPG	403721	769978	GardePro	10s	120	0.6	30	2024-06-27	13:20:57	2024-12-31	12:20:57	2024:06:30	2024-06-30	20:26:37	5.352	C033	Potamochoerus porcus	4.5	-30	DF	394.703	1701.99	Koto	3302.8	2024-06-30 20:26:37	2024-06-27 13:20:57	2024-12-31 12:20:57	1	362	0.333	33.028
C:\Users\user-1\Desktop\My_PHD\5_Redaction_These\Chap2_Metabarcoding & Census\Census\1_Data_Collection\Dossier5\C033\Potamochoerus porcus\DSCF0051.JPG	DSCF0051.JPG	403721	769978	GardePro	10s	120	0.6	30	2024-06-27	13:20:57	2024-12-31	12:20:57	2024:06:30	2024-06-30	20:26:37	5.352	C033	Potamochoerus porcus	4.5	-30	DF	394.703	1701.99	Koto	3302.8	2024-06-30 20:26:37	2024-06-27 13:20:57	2024-12-31 12:20:57	1	363	0.333	33.028
C:\Users\user-1\Desktop\My_PHD\5_Redaction_These\Chap2_Metabarcoding & Census\Census\1_Data_Collection\Dossier5\C033\Potamochoerus porcus\DSCF0052.JPG	DSCF0052.JPG	403721	769978	GardePro	10s	120	0.6	30	2024-06-27	13:20:57	2024-12-31	12:20:57	2024:06:30	2024-06-30	20:26:37	5.352	C033	Potamochoerus porcus	4.5	-30	DF	394.703	1701.99	Koto	3302.8	2024-06-30 20:26:37	2024-06-27 13:20:57	2024-12-31 12:20:57	1	364	0.333	33.028
C:\Users\user-1\Desktop\My_PHD\5_Redaction_These\Chap2_Metabarcoding & Census\Census\1_Data_Collection\Dossier5\C033\Potamochoerus porcus\DSCF0052.JPG	DSCF0052.JPG	403721	769978	GardePro	10s	120	0.6	30	2024-06-27	13:20:57	2024-12-31	12:20:57	2024:06:30	2024-06-30	20:26:37	5.352	C033	Potamochoerus porcus	4.5	-30	DF	394.703	1701.99	Koto	3302.8	2024-06-30 20:26:37	2024-06-27 13:20:57	2024-12-31 12:20:57	1	365	0.333	33.028
C:\Users\user-1\Desktop\My_PHD\5_Redaction_These\Chap2_Metabarcoding & Census\Census\1_Data_Collection\Dossier5\C033\Potamochoerus porcus\DSCF0052.JPG	DSCF0052.JPG	403721	769978	GardePro	10s	120	0.6	30	2024-06-27	13:20:57	2024-12-31	12:20:57	2024:06:30	2024-06-30	20:26:37	5.352	C033	Potamochoerus porcus	4.5	-30	DF	394.703	1701.99	Koto	3302.8	2024-06-30 20:26:37	2024-06-27 13:20:57	2024-12-31 12:20:57	1	366	0.333	33.028
C:\Users\user-1\Desktop\My_PHD\5_Redaction_These\Chap2_Metabarcoding & Census\Census\1_Data_Collection\Dossier5\C033\Potamochoerus porcus\DSCF0052.JPG	DSCF0052.JPG	403721	769978	GardePro	10s	120	0.6	30	2024-06-27	13:20:57	2024-12-31	12:20:57	2024:06:30	2024-06-30	20:26:37	5.352	C033	Potamochoerus porcus	4.5	-30	DF	394.703	1701.99	Koto	3302.8	2024-06-30 20:26:37	2024-06-27 13:20:57	2024-12-31 12:20:57	1	367	0.333	33.028
C:\Users\user-1\Desktop\My_PHD\5_Redaction_These\Chap2_Metabarcoding & Census\Census\1_Data_Collection\Dossier5\C033\Potamochoerus porcus\DSCF0053.JPG	DSCF0053.JPG	403721	769978	GardePro	10s	120	0.6	30	2024-06-27	13:20:57	2024-12-31	12:20:57	2024:06:30	2024-06-30	20:26:42	5.352	C033	Potamochoerus porcus	4.5	-30	DF	394.703	1701.99	Koto	3302.8	2024-06-30 20:26:42	2024-06-27 13:20:57	2024-12-31 12:20:57	1	368	0.333	33.028
C:\Users\user-1\Desktop\My_PHD\5_Redaction_These\Chap2_Metabarcoding & Census\Census\1_Data_Collection\Dossier5\C033\Potamochoerus porcus\DSCF0053.JPG	DSCF0053.JPG	403721	769978	GardePro	10s	120	0.6	30	2024-06-27	13:20:57	2024-12-31	12:20:57	2024:06:30	2024-06-30	20:26:42	5.352	C033	Potamochoerus porcus	4.5	-30	DF	394.703	1701.99	Koto	3302.8	2024-06-30 20:26:42	2024-06-27 13:20:57	2024-12-31 12:20:57	1	369	0.333	33.028
C:\Users\user-1\Desktop\My_PHD\5_Redaction_These\Chap2_Metabarcoding & Census\Census\1_Data_Collection\Dossier5\C033\Potamochoerus porcus\DSCF0053.JPG	DSCF0053.JPG	403721	769978	GardePro	10s	120	0.6	30	2024-06-27	13:20:57	2024-12-31	12:20:57	2024:06:30	2024-06-30	20:26:42	5.352	C033	Potamochoerus porcus	4.5	-30	DF	394.703	1701.99	Koto	3302.8	2024-06-30 20:26:42	2024-06-27 13:20:57	2024-12-31 12:20:57	1	370	0.333	33.028
C:\Users\user-1\Desktop\My_PHD\5_Redaction_These\Chap2_Metabarcoding & Census\Census\1_Data_Collection\Dossier5\C033\Potamochoerus porcus\DSCF0053.JPG	DSCF0053.JPG	403721	769978	GardePro	10s	120	0.6	30	2024-06-27	13:20:57	2024-12-31	12:20:57	2024:06:30	2024-06-30	20:26:42	5.352	C033	Potamochoerus porcus	4.5	-30	DF	394.703	1701.99	Koto	3302.8	2024-06-30 20:26:42	2024-06-27 13:20:57	2024-12-31 12:20:57	1	371	0.333	33.028
C:\Users\user-1\Desktop\My_PHD\5_Redaction_These\Chap2_Metabarcoding & Census\Census\1_Data_Collection\Dossier5\C033\Potamochoerus porcus\DSCF0054.JPG	DSCF0054.JPG	403721	769978	GardePro	10s	120	0.6	30	2024-06-27	13:20:57	2024-12-31	12:20:57	2024:06:30	2024-06-30	20:26:42	5.352	C033	Potamochoerus porcus	4.5	-30	DF	394.703	1701.99	Koto	3302.8	2024-06-30 20:26:42	2024-06-27 13:20:57	2024-12-31 12:20:57	1	372	0.333	33.028
C:\Users\user-1\Desktop\My_PHD\5_Redaction_These\Chap2_Metabarcoding & Census\Census\1_Data_Collection\Dossier5\C033\Potamochoerus porcus\DSCF0054.JPG	DSCF0054.JPG	403721	769978	GardePro	10s	120	0.6	30	2024-06-27	13:20:57	2024-12-31	12:20:57	2024:06:30	2024-06-30	20:26:42	5.352	C033	Potamochoerus porcus	4.5	-30	DF	394.703	1701.99	Koto	3302.8	2024-06-30 20:26:42	2024-06-27 13:20:57	2024-12-31 12:20:57	1	373	0.333	33.028
C:\Users\user-1\Desktop\My_PHD\5_Redaction_These\Chap2_Metabarcoding & Census\Census\1_Data_Collection\Dossier5\C033\Potamochoerus porcus\DSCF0054.JPG	DSCF0054.JPG	403721	769978	GardePro	10s	120	0.6	30	2024-06-27	13:20:57	2024-12-31	12:20:57	2024:06:30	2024-06-30	20:26:42	5.352	C033	Potamochoerus porcus	4.5	-30	DF	394.703	1701.99	Koto	3302.8	2024-06-30 20:26:42	2024-06-27 13:20:57	2024-12-31 12:20:57	1	374	0.333	33.028
C:\Users\user-1\Desktop\My_PHD\5_Redaction_These\Chap2_Metabarcoding & Census\Census\1_Data_Collection\Dossier5\C033\Potamochoerus porcus\DSCF0054.JPG	DSCF0054.JPG	403721	769978	GardePro	10s	120	0.6	30	2024-06-27	13:20:57	2024-12-31	12:20:57	2024:06:30	2024-06-30	20:26:42	5.352	C033	Potamochoerus porcus	4.5	-30	DF	394.703	1701.99	Koto	3302.8	2024-06-30 20:26:42	2024-06-27 13:20:57	2024-12-31 12:20:57	1	375	0.333	33.028
C:\Users\user-1\Desktop\My_PHD\5_Redaction_These\Chap2_Metabarcoding & Census\Census\1_Data_Collection\Dossier5\C033\Potamochoerus porcus\DSCF0055.JPG	DSCF0055.JPG	403721	769978	GardePro	10s	120	0.6	30	2024-06-27	13:20:57	2024-12-31	12:20:57	2024:06:30	2024-06-30	20:26:52	5.353	C033	Potamochoerus porcus	5	-30	DF	394.703	1701.99	Koto	3302.8	2024-06-30 20:26:52	2024-06-27 13:20:57	2024-12-31 12:20:57	1	376	0.333	33.028
C:\Users\user-1\Desktop\My_PHD\5_Redaction_These\Chap2_Metabarcoding & Census\Census\1_Data_Collection\Dossier5\C033\Potamochoerus porcus\DSCF0055.JPG	DSCF0055.JPG	403721	769978	GardePro	10s	120	0.6	30	2024-06-27	13:20:57	2024-12-31	12:20:57	2024:06:30	2024-06-30	20:26:52	5.353	C033	Potamochoerus porcus	5	-30	DF	394.703	1701.99	Koto	3302.8	2024-06-30 20:26:52	2024-06-27 13:20:57	2024-12-31 12:20:57	1	377	0.333	33.028
C:\Users\user-1\Desktop\My_PHD\5_Redaction_These\Chap2_Metabarcoding & Census\Census\1_Data_Collection\Dossier5\C033\Potamochoerus porcus\DSCF0055.JPG	DSCF0055.JPG	403721	769978	GardePro	10s	120	0.6	30	2024-06-27	13:20:57	2024-12-31	12:20:57	2024:06:30	2024-06-30	20:26:52	5.353	C033	Potamochoerus porcus	5	-30	DF	394.703	1701.99	Koto	3302.8	2024-06-30 20:26:52	2024-06-27 13:20:57	2024-12-31 12:20:57	1	378	0.333	33.028
C:\Users\user-1\Desktop\My_PHD\5_Redaction_These\Chap2_Metabarcoding & Census\Census\1_Data_Collection\Dossier5\C033\Potamochoerus porcus\DSCF0055.JPG	DSCF0055.JPG	403721	769978	GardePro	10s	120	0.6	30	2024-06-27	13:20:57	2024-12-31	12:20:57	2024:06:30	2024-06-30	20:26:52	5.353	C033	Potamochoerus porcus	5	-30	DF	394.703	1701.99	Koto	3302.8	2024-06-30 20:26:52	2024-06-27 13:20:57	2024-12-31 12:20:57	1	379	0.333	33.028
C:\Users\user-1\Desktop\My_PHD\5_Redaction_These\Chap2_Metabarcoding & Census\Census\1_Data_Collection\Dossier5\C033\Potamochoerus porcus\DSCF0056.JPG	DSCF0056.JPG	403721	769978	GardePro	10s	120	0.6	30	2024-06-27	13:20:57	2024-12-31	12:20:57	2024:06:30	2024-06-30	20:26:52	5.353	C033	Potamochoerus porcus	5	-30	DF	394.703	1701.99	Koto	3302.8	2024-06-30 20:26:52	2024-06-27 13:20:57	2024-12-31 12:20:57	1	380	0.333	33.028
C:\Users\user-1\Desktop\My_PHD\5_Redaction_These\Chap2_Metabarcoding & Census\Census\1_Data_Collection\Dossier5\C033\Potamochoerus porcus\DSCF0056.JPG	DSCF0056.JPG	403721	769978	GardePro	10s	120	0.6	30	2024-06-27	13:20:57	2024-12-31	12:20:57	2024:06:30	2024-06-30	20:26:52	5.353	C033	Potamochoerus porcus	5	-30	DF	394.703	1701.99	Koto	3302.8	2024-06-30 20:26:52	2024-06-27 13:20:57	2024-12-31 12:20:57	1	381	0.333	33.028
C:\Users\user-1\Desktop\My_PHD\5_Redaction_These\Chap2_Metabarcoding & Census\Census\1_Data_Collection\Dossier5\C033\Potamochoerus porcus\DSCF0056.JPG	DSCF0056.JPG	403721	769978	GardePro	10s	120	0.6	30	2024-06-27	13:20:57	2024-12-31	12:20:57	2024:06:30	2024-06-30	20:26:52	5.353	C033	Potamochoerus porcus	5	-30	DF	394.703	1701.99	Koto	3302.8	2024-06-30 20:26:52	2024-06-27 13:20:57	2024-12-31 12:20:57	1	382	0.333	33.028
C:\Users\user-1\Desktop\My_PHD\5_Redaction_These\Chap2_Metabarcoding & Census\Census\1_Data_Collection\Dossier5\C033\Potamochoerus porcus\DSCF0056.JPG	DSCF0056.JPG	403721	769978	GardePro	10s	120	0.6	30	2024-06-27	13:20:57	2024-12-31	12:20:57	2024:06:30	2024-06-30	20:26:52	5.353	C033	Potamochoerus porcus	5	-30	DF	394.703	1701.99	Koto	3302.8	2024-06-30 20:26:52	2024-06-27 13:20:57	2024-12-31 12:20:57	1	383	0.333	33.028
C:\Users\user-1\Desktop\My_PHD\5_Redaction_These\Chap2_Metabarcoding & Census\Census\1_Data_Collection\Dossier5\C033\Potamochoerus porcus\DSCF0057.JPG	DSCF0057.JPG	403721	769978	GardePro	10s	120	0.6	30	2024-06-27	13:20:57	2024-12-31	12:20:57	2024:06:30	2024-06-30	20:26:59	5.354	C033	Potamochoerus porcus	5	-30	DF	394.703	1701.99	Koto	3302.8	2024-06-30 20:26:59	2024-06-27 13:20:57	2024-12-31 12:20:57	1	384	0.333	33.028
C:\Users\user-1\Desktop\My_PHD\5_Redaction_These\Chap2_Metabarcoding & Census\Census\1_Data_Collection\Dossier5\C033\Potamochoerus porcus\DSCF0057.JPG	DSCF0057.JPG	403721	769978	GardePro	10s	120	0.6	30	2024-06-27	13:20:57	2024-12-31	12:20:57	2024:06:30	2024-06-30	20:26:59	5.354	C033	Potamochoerus porcus	5	-30	DF	394.703	1701.99	Koto	3302.8	2024-06-30 20:26:59	2024-06-27 13:20:57	2024-12-31 12:20:57	1	385	0.333	33.028
C:\Users\user-1\Desktop\My_PHD\5_Redaction_These\Chap2_Metabarcoding & Census\Census\1_Data_Collection\Dossier5\C033\Potamochoerus porcus\DSCF0057.JPG	DSCF0057.JPG	403721	769978	GardePro	10s	120	0.6	30	2024-06-27	13:20:57	2024-12-31	12:20:57	2024:06:30	2024-06-30	20:26:59	5.354	C033	Potamochoerus porcus	5	-30	DF	394.703	1701.99	Koto	3302.8	2024-06-30 20:26:59	2024-06-27 13:20:57	2024-12-31 12:20:57	1	386	0.333	33.028
C:\Users\user-1\Desktop\My_PHD\5_Redaction_These\Chap2_Metabarcoding & Census\Census\1_Data_Collection\Dossier5\C033\Potamochoerus porcus\DSCF0057.JPG	DSCF0057.JPG	403721	769978	GardePro	10s	120	0.6	30	2024-06-27	13:20:57	2024-12-31	12:20:57	2024:06:30	2024-06-30	20:26:59	5.354	C033	Potamochoerus porcus	5	-30	DF	394.703	1701.99	Koto	3302.8	2024-06-30 20:26:59	2024-06-27 13:20:57	2024-12-31 12:20:57	1	387	0.333	33.028
C:\Users\user-1\Desktop\My_PHD\5_Redaction_These\Chap2_Metabarcoding & Census\Census\1_Data_Collection\Dossier5\C033\Potamochoerus porcus\DSCF0058.JPG	DSCF0058.JPG	403721	769978	GardePro	10s	120	0.6	30	2024-06-27	13:20:57	2024-12-31	12:20:57	2024:06:30	2024-06-30	20:26:59	5.354	C033	Potamochoerus porcus	5	-30	DF	394.703	1701.99	Koto	3302.8	2024-06-30 20:26:59	2024-06-27 13:20:57	2024-12-31 12:20:57	1	388	0.333	33.028
C:\Users\user-1\Desktop\My_PHD\5_Redaction_These\Chap2_Metabarcoding & Census\Census\1_Data_Collection\Dossier5\C033\Potamochoerus porcus\DSCF0058.JPG	DSCF0058.JPG	403721	769978	GardePro	10s	120	0.6	30	2024-06-27	13:20:57	2024-12-31	12:20:57	2024:06:30	2024-06-30	20:26:59	5.354	C033	Potamochoerus porcus	5	-30	DF	394.703	1701.99	Koto	3302.8	2024-06-30 20:26:59	2024-06-27 13:20:57	2024-12-31 12:20:57	1	389	0.333	33.028
C:\Users\user-1\Desktop\My_PHD\5_Redaction_These\Chap2_Metabarcoding & Census\Census\1_Data_Collection\Dossier5\C033\Potamochoerus porcus\DSCF0058.JPG	DSCF0058.JPG	403721	769978	GardePro	10s	120	0.6	30	2024-06-27	13:20:57	2024-12-31	12:20:57	2024:06:30	2024-06-30	20:26:59	5.354	C033	Potamochoerus porcus	5	-30	DF	394.703	1701.99	Koto	3302.8	2024-06-30 20:26:59	2024-06-27 13:20:57	2024-12-31 12:20:57	1	390	0.333	33.028
C:\Users\user-1\Desktop\My_PHD\5_Redaction_These\Chap2_Metabarcoding & Census\Census\1_Data_Collection\Dossier5\C033\Potamochoerus porcus\DSCF0058.JPG	DSCF0058.JPG	403721	769978	GardePro	10s	120	0.6	30	2024-06-27	13:20:57	2024-12-31	12:20:57	2024:06:30	2024-06-30	20:26:59	5.354	C033	Potamochoerus porcus	5	-30	DF	394.703	1701.99	Koto	3302.8	2024-06-30 20:26:59	2024-06-27 13:20:57	2024-12-31 12:20:57	1	391	0.333	33.028
C:\Users\user-1\Desktop\My_PHD\5_Redaction_These\Chap2_Metabarcoding & Census\Census\1_Data_Collection\Dossier5\C033\Potamochoerus porcus\DSCF0059.JPG	DSCF0059.JPG	403721	769978	GardePro	10s	120	0.6	30	2024-06-27	13:20:57	2024-12-31	12:20:57	2024:06:30	2024-06-30	20:27:04	5.354	C033	Potamochoerus porcus	5	-30	DF	394.703	1701.99	Koto	3302.8	2024-06-30 20:27:04	2024-06-27 13:20:57	2024-12-31 12:20:57	1	392	0.333	33.028
C:\Users\user-1\Desktop\My_PHD\5_Redaction_These\Chap2_Metabarcoding & Census\Census\1_Data_Collection\Dossier5\C033\Potamochoerus porcus\DSCF0059.JPG	DSCF0059.JPG	403721	769978	GardePro	10s	120	0.6	30	2024-06-27	13:20:57	2024-12-31	12:20:57	2024:06:30	2024-06-30	20:27:04	5.354	C033	Potamochoerus porcus	5	-30	DF	394.703	1701.99	Koto	3302.8	2024-06-30 20:27:04	2024-06-27 13:20:57	2024-12-31 12:20:57	1	393	0.333	33.028
C:\Users\user-1\Desktop\My_PHD\5_Redaction_These\Chap2_Metabarcoding & Census\Census\1_Data_Collection\Dossier5\C033\Potamochoerus porcus\DSCF0059.JPG	DSCF0059.JPG	403721	769978	GardePro	10s	120	0.6	30	2024-06-27	13:20:57	2024-12-31	12:20:57	2024:06:30	2024-06-30	20:27:04	5.354	C033	Potamochoerus porcus	5	-30	DF	394.703	1701.99	Koto	3302.8	2024-06-30 20:27:04	2024-06-27 13:20:57	2024-12-31 12:20:57	1	394	0.333	33.028
C:\Users\user-1\Desktop\My_PHD\5_Redaction_These\Chap2_Metabarcoding & Census\Census\1_Data_Collection\Dossier5\C033\Potamochoerus porcus\DSCF0059.JPG	DSCF0059.JPG	403721	769978	GardePro	10s	120	0.6	30	2024-06-27	13:20:57	2024-12-31	12:20:57	2024:06:30	2024-06-30	20:27:04	5.354	C033	Potamochoerus porcus	5	-30	DF	394.703	1701.99	Koto	3302.8	2024-06-30 20:27:04	2024-06-27 13:20:57	2024-12-31 12:20:57	1	395	0.333	33.028
C:\Users\user-1\Desktop\My_PHD\5_Redaction_These\Chap2_Metabarcoding & Census\Census\1_Data_Collection\Dossier5\C033\Potamochoerus porcus\DSCF0060.JPG	DSCF0060.JPG	403721	769978	GardePro	10s	120	0.6	30	2024-06-27	13:20:57	2024-12-31	12:20:57	2024:06:30	2024-06-30	20:27:04	5.354	C033	Potamochoerus porcus	5	-30	DF	394.703	1701.99	Koto	3302.8	2024-06-30 20:27:04	2024-06-27 13:20:57	2024-12-31 12:20:57	1	396	0.333	33.028
C:\Users\user-1\Desktop\My_PHD\5_Redaction_These\Chap2_Metabarcoding & Census\Census\1_Data_Collection\Dossier5\C033\Potamochoerus porcus\DSCF0060.JPG	DSCF0060.JPG	403721	769978	GardePro	10s	120	0.6	30	2024-06-27	13:20:57	2024-12-31	12:20:57	2024:06:30	2024-06-30	20:27:04	5.354	C033	Potamochoerus porcus	5	-30	DF	394.703	1701.99	Koto	3302.8	2024-06-30 20:27:04	2024-06-27 13:20:57	2024-12-31 12:20:57	1	397	0.333	33.028
C:\Users\user-1\Desktop\My_PHD\5_Redaction_These\Chap2_Metabarcoding & Census\Census\1_Data_Collection\Dossier5\C033\Potamochoerus porcus\DSCF0060.JPG	DSCF0060.JPG	403721	769978	GardePro	10s	120	0.6	30	2024-06-27	13:20:57	2024-12-31	12:20:57	2024:06:30	2024-06-30	20:27:04	5.354	C033	Potamochoerus porcus	5	-30	DF	394.703	1701.99	Koto	3302.8	2024-06-30 20:27:04	2024-06-27 13:20:57	2024-12-31 12:20:57	1	398	0.333	33.028
C:\Users\user-1\Desktop\My_PHD\5_Redaction_These\Chap2_Metabarcoding & Census\Census\1_Data_Collection\Dossier5\C033\Potamochoerus porcus\DSCF0060.JPG	DSCF0060.JPG	403721	769978	GardePro	10s	120	0.6	30	2024-06-27	13:20:57	2024-12-31	12:20:57	2024:06:30	2024-06-30	20:27:04	5.354	C033	Potamochoerus porcus	5	-30	DF	394.703	1701.99	Koto	3302.8	2024-06-30 20:27:04	2024-06-27 13:20:57	2024-12-31 12:20:57	1	399	0.333	33.028
C:\Users\user-1\Desktop\My_PHD\5_Redaction_These\Chap2_Metabarcoding & Census\Census\1_Data_Collection\Dossier5\C033\Potamochoerus porcus\DSCF0061.JPG	DSCF0061.JPG	403721	769978	GardePro	10s	120	0.6	30	2024-06-27	13:20:57	2024-12-31	12:20:57	2024:06:30	2024-06-30	20:27:12	5.355	C033	Potamochoerus porcus	6.5	-30	DF	394.703	1701.99	Koto	3302.8	2024-06-30 20:27:12	2024-06-27 13:20:57	2024-12-31 12:20:57	1	400	0.333	33.028
C:\Users\user-1\Desktop\My_PHD\5_Redaction_These\Chap2_Metabarcoding & Census\Census\1_Data_Collection\Dossier5\C033\Potamochoerus porcus\DSCF0061.JPG	DSCF0061.JPG	403721	769978	GardePro	10s	120	0.6	30	2024-06-27	13:20:57	2024-12-31	12:20:57	2024:06:30	2024-06-30	20:27:12	5.355	C033	Potamochoerus porcus	6.5	-30	DF	394.703	1701.99	Koto	3302.8	2024-06-30 20:27:12	2024-06-27 13:20:57	2024-12-31 12:20:57	1	401	0.333	33.028
C:\Users\user-1\Desktop\My_PHD\5_Redaction_These\Chap2_Metabarcoding & Census\Census\1_Data_Collection\Dossier5\C033\Potamochoerus porcus\DSCF0061.JPG	DSCF0061.JPG	403721	769978	GardePro	10s	120	0.6	30	2024-06-27	13:20:57	2024-12-31	12:20:57	2024:06:30	2024-06-30	20:27:12	5.355	C033	Potamochoerus porcus	6.5	-30	DF	394.703	1701.99	Koto	3302.8	2024-06-30 20:27:12	2024-06-27 13:20:57	2024-12-31 12:20:57	1	402	0.333	33.028
C:\Users\user-1\Desktop\My_PHD\5_Redaction_These\Chap2_Metabarcoding & Census\Census\1_Data_Collection\Dossier5\C033\Potamochoerus porcus\DSCF0061.JPG	DSCF0061.JPG	403721	769978	GardePro	10s	120	0.6	30	2024-06-27	13:20:57	2024-12-31	12:20:57	2024:06:30	2024-06-30	20:27:12	5.355	C033	Potamochoerus porcus	6.5	-30	DF	394.703	1701.99	Koto	3302.8	2024-06-30 20:27:12	2024-06-27 13:20:57	2024-12-31 12:20:57	1	403	0.333	33.028
C:\Users\user-1\Desktop\My_PHD\5_Redaction_These\Chap2_Metabarcoding & Census\Census\1_Data_Collection\Dossier5\C033\Potamochoerus porcus\DSCF0062.JPG	DSCF0062.JPG	403721	769978	GardePro	10s	120	0.6	30	2024-06-27	13:20:57	2024-12-31	12:20:57	2024:06:30	2024-06-30	20:27:12	5.355	C033	Potamochoerus porcus	6.5	-30	DF	394.703	1701.99	Koto	3302.8	2024-06-30 20:27:12	2024-06-27 13:20:57	2024-12-31 12:20:57	1	404	0.333	33.028
C:\Users\user-1\Desktop\My_PHD\5_Redaction_These\Chap2_Metabarcoding & Census\Census\1_Data_Collection\Dossier5\C033\Potamochoerus porcus\DSCF0062.JPG	DSCF0062.JPG	403721	769978	GardePro	10s	120	0.6	30	2024-06-27	13:20:57	2024-12-31	12:20:57	2024:06:30	2024-06-30	20:27:12	5.355	C033	Potamochoerus porcus	6.5	-30	DF	394.703	1701.99	Koto	3302.8	2024-06-30 20:27:12	2024-06-27 13:20:57	2024-12-31 12:20:57	1	405	0.333	33.028
C:\Users\user-1\Desktop\My_PHD\5_Redaction_These\Chap2_Metabarcoding & Census\Census\1_Data_Collection\Dossier5\C033\Potamochoerus porcus\DSCF0062.JPG	DSCF0062.JPG	403721	769978	GardePro	10s	120	0.6	30	2024-06-27	13:20:57	2024-12-31	12:20:57	2024:06:30	2024-06-30	20:27:12	5.355	C033	Potamochoerus porcus	6.5	-30	DF	394.703	1701.99	Koto	3302.8	2024-06-30 20:27:12	2024-06-27 13:20:57	2024-12-31 12:20:57	1	406	0.333	33.028
C:\Users\user-1\Desktop\My_PHD\5_Redaction_These\Chap2_Metabarcoding & Census\Census\1_Data_Collection\Dossier5\C033\Potamochoerus porcus\DSCF0062.JPG	DSCF0062.JPG	403721	769978	GardePro	10s	120	0.6	30	2024-06-27	13:20:57	2024-12-31	12:20:57	2024:06:30	2024-06-30	20:27:12	5.355	C033	Potamochoerus porcus	6.5	-30	DF	394.703	1701.99	Koto	3302.8	2024-06-30 20:27:12	2024-06-27 13:20:57	2024-12-31 12:20:57	1	407	0.333	33.028
C:\Users\user-1\Desktop\My_PHD\5_Redaction_These\Chap2_Metabarcoding & Census\Census\1_Data_Collection\Dossier5\C033\Potamochoerus porcus\DSCF0063.JPG	DSCF0063.JPG	403721	769978	GardePro	10s	120	0.6	30	2024-06-27	13:20:57	2024-12-31	12:20:57	2024:06:30	2024-06-30	20:27:24	5.356	C033	Potamochoerus porcus	6.5	-30	DF	394.703	1701.99	Koto	3302.8	2024-06-30 20:27:24	2024-06-27 13:20:57	2024-12-31 12:20:57	1	408	0.333	33.028
C:\Users\user-1\Desktop\My_PHD\5_Redaction_These\Chap2_Metabarcoding & Census\Census\1_Data_Collection\Dossier5\C033\Potamochoerus porcus\DSCF0063.JPG	DSCF0063.JPG	403721	769978	GardePro	10s	120	0.6	30	2024-06-27	13:20:57	2024-12-31	12:20:57	2024:06:30	2024-06-30	20:27:24	5.356	C033	Potamochoerus porcus	6.5	-30	DF	394.703	1701.99	Koto	3302.8	2024-06-30 20:27:24	2024-06-27 13:20:57	2024-12-31 12:20:57	1	409	0.333	33.028
C:\Users\user-1\Desktop\My_PHD\5_Redaction_These\Chap2_Metabarcoding & Census\Census\1_Data_Collection\Dossier5\C033\Potamochoerus porcus\DSCF0063.JPG	DSCF0063.JPG	403721	769978	GardePro	10s	120	0.6	30	2024-06-27	13:20:57	2024-12-31	12:20:57	2024:06:30	2024-06-30	20:27:24	5.356	C033	Potamochoerus porcus	6.5	-30	DF	394.703	1701.99	Koto	3302.8	2024-06-30 20:27:24	2024-06-27 13:20:57	2024-12-31 12:20:57	1	410	0.333	33.028
C:\Users\user-1\Desktop\My_PHD\5_Redaction_These\Chap2_Metabarcoding & Census\Census\1_Data_Collection\Dossier5\C033\Potamochoerus porcus\DSCF0063.JPG	DSCF0063.JPG	403721	769978	GardePro	10s	120	0.6	30	2024-06-27	13:20:57	2024-12-31	12:20:57	2024:06:30	2024-06-30	20:27:24	5.356	C033	Potamochoerus porcus	6.5	-30	DF	394.703	1701.99	Koto	3302.8	2024-06-30 20:27:24	2024-06-27 13:20:57	2024-12-31 12:20:57	1	411	0.333	33.028
C:\Users\user-1\Desktop\My_PHD\5_Redaction_These\Chap2_Metabarcoding & Census\Census\1_Data_Collection\Dossier5\C033\Potamochoerus porcus\DSCF0064.JPG	DSCF0064.JPG	403721	769978	GardePro	10s	120	0.6	30	2024-06-27	13:20:57	2024-12-31	12:20:57	2024:06:30	2024-06-30	20:27:24	5.356	C033	Potamochoerus porcus	6.5	-30	DF	394.703	1701.99	Koto	3302.8	2024-06-30 20:27:24	2024-06-27 13:20:57	2024-12-31 12:20:57	1	412	0.333	33.028
C:\Users\user-1\Desktop\My_PHD\5_Redaction_These\Chap2_Metabarcoding & Census\Census\1_Data_Collection\Dossier5\C033\Potamochoerus porcus\DSCF0064.JPG	DSCF0064.JPG	403721	769978	GardePro	10s	120	0.6	30	2024-06-27	13:20:57	2024-12-31	12:20:57	2024:06:30	2024-06-30	20:27:24	5.356	C033	Potamochoerus porcus	6.5	-30	DF	394.703	1701.99	Koto	3302.8	2024-06-30 20:27:24	2024-06-27 13:20:57	2024-12-31 12:20:57	1	413	0.333	33.028
C:\Users\user-1\Desktop\My_PHD\5_Redaction_These\Chap2_Metabarcoding & Census\Census\1_Data_Collection\Dossier5\C033\Potamochoerus porcus\DSCF0064.JPG	DSCF0064.JPG	403721	769978	GardePro	10s	120	0.6	30	2024-06-27	13:20:57	2024-12-31	12:20:57	2024:06:30	2024-06-30	20:27:24	5.356	C033	Potamochoerus porcus	6.5	-30	DF	394.703	1701.99	Koto	3302.8	2024-06-30 20:27:24	2024-06-27 13:20:57	2024-12-31 12:20:57	1	414	0.333	33.028
C:\Users\user-1\Desktop\My_PHD\5_Redaction_These\Chap2_Metabarcoding & Census\Census\1_Data_Collection\Dossier5\C033\Potamochoerus porcus\DSCF0064.JPG	DSCF0064.JPG	403721	769978	GardePro	10s	120	0.6	30	2024-06-27	13:20:57	2024-12-31	12:20:57	2024:06:30	2024-06-30	20:27:24	5.356	C033	Potamochoerus porcus	6.5	-30	DF	394.703	1701.99	Koto	3302.8	2024-06-30 20:27:24	2024-06-27 13:20:57	2024-12-31 12:20:57	1	415	0.333	33.028
C:\Users\user-1\Desktop\My_PHD\5_Redaction_These\Chap2_Metabarcoding & Census\Census\1_Data_Collection\Dossier5\C033\Potamochoerus porcus\DSCF0065.JPG	DSCF0065.JPG	403721	769978	GardePro	10s	120	0.6	30	2024-06-27	13:20:57	2024-12-31	12:20:57	2024:06:30	2024-06-30	20:27:36	5.356	C033	Potamochoerus porcus	6.5	-30	DF	394.703	1701.99	Koto	3302.8	2024-06-30 20:27:36	2024-06-27 13:20:57	2024-12-31 12:20:57	1	416	0.333	33.028
C:\Users\user-1\Desktop\My_PHD\5_Redaction_These\Chap2_Metabarcoding & Census\Census\1_Data_Collection\Dossier5\C033\Potamochoerus porcus\DSCF0065.JPG	DSCF0065.JPG	403721	769978	GardePro	10s	120	0.6	30	2024-06-27	13:20:57	2024-12-31	12:20:57	2024:06:30	2024-06-30	20:27:36	5.356	C033	Potamochoerus porcus	6.5	-30	DF	394.703	1701.99	Koto	3302.8	2024-06-30 20:27:36	2024-06-27 13:20:57	2024-12-31 12:20:57	1	417	0.333	33.028
C:\Users\user-1\Desktop\My_PHD\5_Redaction_These\Chap2_Metabarcoding & Census\Census\1_Data_Collection\Dossier5\C033\Potamochoerus porcus\DSCF0065.JPG	DSCF0065.JPG	403721	769978	GardePro	10s	120	0.6	30	2024-06-27	13:20:57	2024-12-31	12:20:57	2024:06:30	2024-06-30	20:27:36	5.356	C033	Potamochoerus porcus	6.5	-30	DF	394.703	1701.99	Koto	3302.8	2024-06-30 20:27:36	2024-06-27 13:20:57	2024-12-31 12:20:57	1	418	0.333	33.028
C:\Users\user-1\Desktop\My_PHD\5_Redaction_These\Chap2_Metabarcoding & Census\Census\1_Data_Collection\Dossier5\C033\Potamochoerus porcus\DSCF0066.JPG	DSCF0066.JPG	403721	769978	GardePro	10s	120	0.6	30	2024-06-27	13:20:57	2024-12-31	12:20:57	2024:06:30	2024-06-30	20:27:36	5.356	C033	Potamochoerus porcus	6.5	-30	DF	394.703	1701.99	Koto	3302.8	2024-06-30 20:27:36	2024-06-27 13:20:57	2024-12-31 12:20:57	1	419	0.333	33.028
C:\Users\user-1\Desktop\My_PHD\5_Redaction_These\Chap2_Metabarcoding & Census\Census\1_Data_Collection\Dossier5\C033\Potamochoerus porcus\DSCF0066.JPG	DSCF0066.JPG	403721	769978	GardePro	10s	120	0.6	30	2024-06-27	13:20:57	2024-12-31	12:20:57	2024:06:30	2024-06-30	20:27:36	5.356	C033	Potamochoerus porcus	6.5	-30	DF	394.703	1701.99	Koto	3302.8	2024-06-30 20:27:36	2024-06-27 13:20:57	2024-12-31 12:20:57	1	420	0.333	33.028
C:\Users\user-1\Desktop\My_PHD\5_Redaction_These\Chap2_Metabarcoding & Census\Census\1_Data_Collection\Dossier5\C033\Potamochoerus porcus\DSCF0066.JPG	DSCF0066.JPG	403721	769978	GardePro	10s	120	0.6	30	2024-06-27	13:20:57	2024-12-31	12:20:57	2024:06:30	2024-06-30	20:27:36	5.356	C033	Potamochoerus porcus	6.5	-30	DF	394.703	1701.99	Koto	3302.8	2024-06-30 20:27:36	2024-06-27 13:20:57	2024-12-31 12:20:57	1	421	0.333	33.028
C:\Users\user-1\Desktop\My_PHD\5_Redaction_These\Chap2_Metabarcoding & Census\Census\1_Data_Collection\Dossier5\C033\Potamochoerus porcus\DSCF0067.JPG	DSCF0067.JPG	403721	769978	GardePro	10s	120	0.6	30	2024-06-27	13:20:57	2024-12-31	12:20:57	2024:06:30	2024-06-30	20:27:42	5.357	C033	Potamochoerus porcus	6.5	-30	DF	394.703	1701.99	Koto	3302.8	2024-06-30 20:27:42	2024-06-27 13:20:57	2024-12-31 12:20:57	1	422	0.333	33.028
C:\Users\user-1\Desktop\My_PHD\5_Redaction_These\Chap2_Metabarcoding & Census\Census\1_Data_Collection\Dossier5\C033\Potamochoerus porcus\DSCF0067.JPG	DSCF0067.JPG	403721	769978	GardePro	10s	120	0.6	30	2024-06-27	13:20:57	2024-12-31	12:20:57	2024:06:30	2024-06-30	20:27:42	5.357	C033	Potamochoerus porcus	6.5	-30	DF	394.703	1701.99	Koto	3302.8	2024-06-30 20:27:42	2024-06-27 13:20:57	2024-12-31 12:20:57	1	423	0.333	33.028
C:\Users\user-1\Desktop\My_PHD\5_Redaction_These\Chap2_Metabarcoding & Census\Census\1_Data_Collection\Dossier5\C033\Potamochoerus porcus\DSCF0067.JPG	DSCF0067.JPG	403721	769978	GardePro	10s	120	0.6	30	2024-06-27	13:20:57	2024-12-31	12:20:57	2024:06:30	2024-06-30	20:27:42	5.357	C033	Potamochoerus porcus	6.5	-30	DF	394.703	1701.99	Koto	3302.8	2024-06-30 20:27:42	2024-06-27 13:20:57	2024-12-31 12:20:57	1	424	0.333	33.028
C:\Users\user-1\Desktop\My_PHD\5_Redaction_These\Chap2_Metabarcoding & Census\Census\1_Data_Collection\Dossier5\C033\Potamochoerus porcus\DSCF0068.JPG	DSCF0068.JPG	403721	769978	GardePro	10s	120	0.6	30	2024-06-27	13:20:57	2024-12-31	12:20:57	2024:06:30	2024-06-30	20:27:42	5.357	C033	Potamochoerus porcus	6.5	-30	DF	394.703	1701.99	Koto	3302.8	2024-06-30 20:27:42	2024-06-27 13:20:57	2024-12-31 12:20:57	1	425	0.333	33.028
C:\Users\user-1\Desktop\My_PHD\5_Redaction_These\Chap2_Metabarcoding & Census\Census\1_Data_Collection\Dossier5\C033\Potamochoerus porcus\DSCF0068.JPG	DSCF0068.JPG	403721	769978	GardePro	10s	120	0.6	30	2024-06-27	13:20:57	2024-12-31	12:20:57	2024:06:30	2024-06-30	20:27:42	5.357	C033	Potamochoerus porcus	6.5	-30	DF	394.703	1701.99	Koto	3302.8	2024-06-30 20:27:42	2024-06-27 13:20:57	2024-12-31 12:20:57	1	426	0.333	33.028
C:\Users\user-1\Desktop\My_PHD\5_Redaction_These\Chap2_Metabarcoding & Census\Census\1_Data_Collection\Dossier5\C033\Potamochoerus porcus\DSCF0068.JPG	DSCF0068.JPG	403721	769978	GardePro	10s	120	0.6	30	2024-06-27	13:20:57	2024-12-31	12:20:57	2024:06:30	2024-06-30	20:27:42	5.357	C033	Potamochoerus porcus	6.5	-30	DF	394.703	1701.99	Koto	3302.8	2024-06-30 20:27:42	2024-06-27 13:20:57	2024-12-31 12:20:57	1	427	0.333	33.028
C:\Users\user-1\Desktop\My_PHD\5_Redaction_These\Chap2_Metabarcoding & Census\Census\1_Data_Collection\Dossier5\C033\Potamochoerus porcus\DSCF0069.JPG	DSCF0069.JPG	403721	769978	GardePro	10s	120	0.6	30	2024-06-27	13:20:57	2024-12-31	12:20:57	2024:06:30	2024-06-30	20:27:47	5.357	C033	Potamochoerus porcus	6.5	-35	DF	394.703	1701.99	Koto	3302.8	2024-06-30 20:27:47	2024-06-27 13:20:57	2024-12-31 12:20:57	1	428	0.333	33.028
C:\Users\user-1\Desktop\My_PHD\5_Redaction_These\Chap2_Metabarcoding & Census\Census\1_Data_Collection\Dossier5\C033\Potamochoerus porcus\DSCF0069.JPG	DSCF0069.JPG	403721	769978	GardePro	10s	120	0.6	30	2024-06-27	13:20:57	2024-12-31	12:20:57	2024:06:30	2024-06-30	20:27:47	5.357	C033	Potamochoerus porcus	6.5	-35	DF	394.703	1701.99	Koto	3302.8	2024-06-30 20:27:47	2024-06-27 13:20:57	2024-12-31 12:20:57	1	429	0.333	33.028
C:\Users\user-1\Desktop\My_PHD\5_Redaction_These\Chap2_Metabarcoding & Census\Census\1_Data_Collection\Dossier5\C033\Potamochoerus porcus\DSCF0069.JPG	DSCF0069.JPG	403721	769978	GardePro	10s	120	0.6	30	2024-06-27	13:20:57	2024-12-31	12:20:57	2024:06:30	2024-06-30	20:27:47	5.357	C033	Potamochoerus porcus	6.5	-35	DF	394.703	1701.99	Koto	3302.8	2024-06-30 20:27:47	2024-06-27 13:20:57	2024-12-31 12:20:57	1	430	0.333	33.028
C:\Users\user-1\Desktop\My_PHD\5_Redaction_These\Chap2_Metabarcoding & Census\Census\1_Data_Collection\Dossier5\C033\Potamochoerus porcus\DSCF0070.JPG	DSCF0070.JPG	403721	769978	GardePro	10s	120	0.6	30	2024-06-27	13:20:57	2024-12-31	12:20:57	2024:06:30	2024-06-30	20:27:47	5.357	C033	Potamochoerus porcus	6.5	-35	DF	394.703	1701.99	Koto	3302.8	2024-06-30 20:27:47	2024-06-27 13:20:57	2024-12-31 12:20:57	1	431	0.333	33.028
C:\Users\user-1\Desktop\My_PHD\5_Redaction_These\Chap2_Metabarcoding & Census\Census\1_Data_Collection\Dossier5\C033\Potamochoerus porcus\DSCF0070.JPG	DSCF0070.JPG	403721	769978	GardePro	10s	120	0.6	30	2024-06-27	13:20:57	2024-12-31	12:20:57	2024:06:30	2024-06-30	20:27:47	5.357	C033	Potamochoerus porcus	6.5	-35	DF	394.703	1701.99	Koto	3302.8	2024-06-30 20:27:47	2024-06-27 13:20:57	2024-12-31 12:20:57	1	432	0.333	33.028
C:\Users\user-1\Desktop\My_PHD\5_Redaction_These\Chap2_Metabarcoding & Census\Census\1_Data_Collection\Dossier5\C033\Potamochoerus porcus\DSCF0070.JPG	DSCF0070.JPG	403721	769978	GardePro	10s	120	0.6	30	2024-06-27	13:20:57	2024-12-31	12:20:57	2024:06:30	2024-06-30	20:27:47	5.357	C033	Potamochoerus porcus	6.5	-35	DF	394.703	1701.99	Koto	3302.8	2024-06-30 20:27:47	2024-06-27 13:20:57	2024-12-31 12:20:57	1	433	0.333	33.028
C:\Users\user-1\Desktop\My_PHD\5_Redaction_These\Chap2_Metabarcoding & Census\Census\1_Data_Collection\Dossier5\C036\Genetta genetta\06300017.JPG	06300017.JPG	406699	769933	BUSHNEL	10s	35	0.6	33.5	2024-06-27	10:02:29	2024-12-31	9:02:29	2024:06:30	2024-06-30	19:43:00	5.162	C036	Genetta pardina/maculata	3.5	0	DF	133.824	2649.54	Zalime	3302.8	2024-06-30 19:43:00	2024-06-27 10:02:29	2024-12-31 9:02:29	1	434	0.097	33.028
C:\Users\user-1\Desktop\My_PHD\5_Redaction_These\Chap2_Metabarcoding & Census\Census\1_Data_Collection\Dossier5\C036\Genetta genetta\06300018.JPG	06300018.JPG	406699	769933	BUSHNEL	10s	35	0.6	33.5	2024-06-27	10:02:29	2024-12-31	9:02:29	2024:06:30	2024-06-30	19:43:01	5.162	C036	Genetta pardina/maculata	3	3	DF	133.824	2649.54	Zalime	3302.8	2024-06-30 19:43:01	2024-06-27 10:02:29	2024-12-31 9:02:29	1	435	0.097	33.028
C:\Users\user-1\Desktop\My_PHD\5_Redaction_These\Chap2_Metabarcoding & Census\Census\1_Data_Collection\Dossier3\C026\Genetta genetta\DSCF0019.JPG	DSCF0019.JPG	404727	768963	GardePro	10s	120	0.6	30	2024-06-24	12:34:07	2024-12-31	11:34:07	2024:07:01	2024-07-01	5:42:51	1.496	C026	Genetta pardina/maculata	3.5	40	DF	1463.17	3087.76	Koto	3302.8	2024-07-01 5:42:51	2024-06-24 12:34:07	2024-12-31 11:34:07	1	436	0.333	33.028
C:\Users\user-1\Desktop\My_PHD\5_Redaction_These\Chap2_Metabarcoding & Census\Census\1_Data_Collection\Dossier3\C026\Genetta genetta\DSCF0020.JPG	DSCF0020.JPG	404727	768963	GardePro	10s	120	0.6	30	2024-06-24	12:34:07	2024-12-31	11:34:07	2024:07:01	2024-07-01	5:42:51	1.496	C026	Genetta pardina/maculata	3.5	40	DF	1463.17	3087.76	Koto	3302.8	2024-07-01 5:42:51	2024-06-24 12:34:07	2024-12-31 11:34:07	1	437	0.333	33.028
C:\Users\user-1\Desktop\My_PHD\5_Redaction_These\Chap2_Metabarcoding & Census\Census\1_Data_Collection\Dossier4\C027\Thryonomys swinderianus\DSCF0091.JPG	DSCF0091.JPG	405682	768980	GardePro	10s	120	0.6	30	2024-06-24	11:13:40	2024-12-31	10:13:40	2024:07:01	2024-07-01	21:32:43	5.641	C027	Atherurus africanus	7.5	20	DF	1322.08	3769.26	Koto	3302.8	2024-07-01 21:32:43	2024-06-24 11:13:40	2024-12-31 10:13:40	1	438	0.333	33.028
C:\Users\user-1\Desktop\My_PHD\5_Redaction_These\Chap2_Metabarcoding & Census\Census\1_Data_Collection\Dossier4\C027\Thryonomys swinderianus\DSCF0092.JPG	DSCF0092.JPG	405682	768980	GardePro	10s	120	0.6	30	2024-06-24	11:13:40	2024-12-31	10:13:40	2024:07:01	2024-07-01	21:32:44	5.641	C027	Atherurus africanus	7.5	20	DF	1322.08	3769.26	Koto	3302.8	2024-07-01 21:32:44	2024-06-24 11:13:40	2024-12-31 10:13:40	1	439	0.333	33.028
C:\Users\user-1\Desktop\My_PHD\5_Redaction_These\Chap2_Metabarcoding & Census\Census\1_Data_Collection\Dossier4\C027\Thryonomys swinderianus\DSCF0093.JPG	DSCF0093.JPG	405682	768980	GardePro	10s	120	0.6	30	2024-06-24	11:13:40	2024-12-31	10:13:40	2024:07:01	2024-07-01	21:32:47	5.641	C027	Atherurus africanus	7.5	15	DF	1322.08	3769.26	Koto	3302.8	2024-07-01 21:32:47	2024-06-24 11:13:40	2024-12-31 10:13:40	1	440	0.333	33.028
C:\Users\user-1\Desktop\My_PHD\5_Redaction_These\Chap2_Metabarcoding & Census\Census\1_Data_Collection\Dossier4\C027\Thryonomys swinderianus\DSCF0094.JPG	DSCF0094.JPG	405682	768980	GardePro	10s	120	0.6	30	2024-06-24	11:13:40	2024-12-31	10:13:40	2024:07:01	2024-07-01	21:32:48	5.641	C027	Atherurus africanus	7.5	15	DF	1322.08	3769.26	Koto	3302.8	2024-07-01 21:32:48	2024-06-24 11:13:40	2024-12-31 10:13:40	1	441	0.333	33.028
C:\Users\user-1\Desktop\My_PHD\5_Redaction_These\Chap2_Metabarcoding & Census\Census\1_Data_Collection\Dossier4\C027\Thryonomys swinderianus\DSCF0095.JPG	DSCF0095.JPG	405682	768980	GardePro	10s	120	0.6	30	2024-06-24	11:13:40	2024-12-31	10:13:40	2024:07:01	2024-07-01	21:32:52	5.641	C027	Atherurus africanus	7.5	-25	DF	1322.08	3769.26	Koto	3302.8	2024-07-01 21:32:52	2024-06-24 11:13:40	2024-12-31 10:13:40	1	442	0.333	33.028
C:\Users\user-1\Desktop\My_PHD\5_Redaction_These\Chap2_Metabarcoding & Census\Census\1_Data_Collection\Dossier4\C027\Thryonomys swinderianus\DSCF0096.JPG	DSCF0096.JPG	405682	768980	GardePro	10s	120	0.6	30	2024-06-24	11:13:40	2024-12-31	10:13:40	2024:07:01	2024-07-01	21:32:53	5.641	C027	Atherurus africanus	7.5	-30	DF	1322.08	3769.26	Koto	3302.8	2024-07-01 21:32:53	2024-06-24 11:13:40	2024-12-31 10:13:40	1	443	0.333	33.028
C:\Users\user-1\Desktop\My_PHD\5_Redaction_These\Chap2_Metabarcoding & Census\Census\1_Data_Collection\Dossier4\C027\Thryonomys swinderianus\DSCF0097.JPG	DSCF0097.JPG	405682	768980	GardePro	10s	120	0.6	30	2024-06-24	11:13:40	2024-12-31	10:13:40	2024:07:01	2024-07-01	21:32:58	5.642	C027	Atherurus africanus	7.5	-40	DF	1322.08	3769.26	Koto	3302.8	2024-07-01 21:32:58	2024-06-24 11:13:40	2024-12-31 10:13:40	1	444	0.333	33.028
C:\Users\user-1\Desktop\My_PHD\5_Redaction_These\Chap2_Metabarcoding & Census\Census\1_Data_Collection\Dossier4\C027\Thryonomys swinderianus\DSCF0098.JPG	DSCF0098.JPG	405682	768980	GardePro	10s	120	0.6	30	2024-06-24	11:13:40	2024-12-31	10:13:40	2024:07:01	2024-07-01	21:32:59	5.642	C027	Atherurus africanus	7.5	-45	DF	1322.08	3769.26	Koto	3302.8	2024-07-01 21:32:59	2024-06-24 11:13:40	2024-12-31 10:13:40	1	445	0.333	33.028
C:\Users\user-1\Desktop\My_PHD\5_Redaction_These\Chap2_Metabarcoding & Census\Census\1_Data_Collection\Dossier5\C037\Tragelaphus scriptus\07010009.JPG	07010009.JPG	407721	769948	BUSHNEL	10s	35	0.6	33.5	2024-06-27	9:13:11	2024-12-31	8:13:11	2024:07:01	2024-07-01	10:21:11	2.71	C037	Tragelaphus scriptus	4.5	12	DF	502.305	1649.58	Zalime	3302.8	2024-07-01 10:21:11	2024-06-27 9:13:11	2024-12-31 8:13:11	1	446	0.097	33.028
C:\Users\user-1\Desktop\My_PHD\5_Redaction_These\Chap2_Metabarcoding & Census\Census\1_Data_Collection\Dossier5\C037\Tragelaphus scriptus\07010010.JPG	07010010.JPG	407721	769948	BUSHNEL	10s	35	0.6	33.5	2024-06-27	9:13:11	2024-12-31	8:13:11	2024:07:01	2024-07-01	10:21:11	2.71	C037	Tragelaphus scriptus	4.5	12	DF	502.305	1649.58	Zalime	3302.8	2024-07-01 10:21:11	2024-06-27 9:13:11	2024-12-31 8:13:11	1	447	0.097	33.028
C:\Users\user-1\Desktop\My_PHD\5_Redaction_These\Chap2_Metabarcoding & Census\Census\1_Data_Collection\Dossier3\C026\Thryonomys swinderianus\DSCF0021.JPG	DSCF0021.JPG	404727	768963	GardePro	10s	120	0.6	30	2024-06-24	12:34:07	2024-12-31	11:34:07	2024:07:02	2024-07-02	14:22:21	3.763	C026	Atherurus africanus	3.5	-25	DF	1463.17	3087.76	Koto	3302.8	2024-07-02 14:22:21	2024-06-24 12:34:07	2024-12-31 11:34:07	1	448	0.333	33.028
C:\Users\user-1\Desktop\My_PHD\5_Redaction_These\Chap2_Metabarcoding & Census\Census\1_Data_Collection\Dossier3\C026\Thryonomys swinderianus\DSCF0022.JPG	DSCF0022.JPG	404727	768963	GardePro	10s	120	0.6	30	2024-06-24	12:34:07	2024-12-31	11:34:07	2024:07:02	2024-07-02	14:22:21	3.763	C026	Atherurus africanus	3.5	-25	DF	1463.17	3087.76	Koto	3302.8	2024-07-02 14:22:21	2024-06-24 12:34:07	2024-12-31 11:34:07	1	449	0.333	33.028
C:\Users\user-1\Desktop\My_PHD\5_Redaction_These\Chap2_Metabarcoding & Census\Census\1_Data_Collection\Dossier4\C027\Chlorocebus tantalus\DSCF0099.JPG	DSCF0099.JPG	405682	768980	GardePro	10s	120	0.6	30	2024-06-24	11:13:40	2024-12-31	10:13:40	2024:07:02	2024-07-02	12:18:05	3.22	C027	Chlorocebus tantalus	6.5	40	DF	1322.08	3769.26	Koto	3302.8	2024-07-02 12:18:05	2024-06-24 11:13:40	2024-12-31 10:13:40	1	450	0.333	33.028
C:\Users\user-1\Desktop\My_PHD\5_Redaction_These\Chap2_Metabarcoding & Census\Census\1_Data_Collection\Dossier4\C027\Chlorocebus tantalus\DSCF0100.JPG	DSCF0100.JPG	405682	768980	GardePro	10s	120	0.6	30	2024-06-24	11:13:40	2024-12-31	10:13:40	2024:07:02	2024-07-02	12:18:06	3.221	C027	Chlorocebus tantalus	6.5	40	DF	1322.08	3769.26	Koto	3302.8	2024-07-02 12:18:06	2024-06-24 11:13:40	2024-12-31 10:13:40	1	451	0.333	33.028
C:\Users\user-1\Desktop\My_PHD\5_Redaction_These\Chap2_Metabarcoding & Census\Census\1_Data_Collection\Dossier4\C027\Chlorocebus tantalus\DSCF0101.JPG	DSCF0101.JPG	405682	768980	GardePro	10s	120	0.6	30	2024-06-24	11:13:40	2024-12-31	10:13:40	2024:07:02	2024-07-02	12:18:12	3.221	C027	Chlorocebus tantalus	6.5	45	DF	1322.08	3769.26	Koto	3302.8	2024-07-02 12:18:12	2024-06-24 11:13:40	2024-12-31 10:13:40	1	452	0.333	33.028
C:\Users\user-1\Desktop\My_PHD\5_Redaction_These\Chap2_Metabarcoding & Census\Census\1_Data_Collection\Dossier4\C027\Chlorocebus tantalus\DSCF0102.JPG	DSCF0102.JPG	405682	768980	GardePro	10s	120	0.6	30	2024-06-24	11:13:40	2024-12-31	10:13:40	2024:07:02	2024-07-02	12:18:13	3.221	C027	Chlorocebus tantalus	6.5	45	DF	1322.08	3769.26	Koto	3302.8	2024-07-02 12:18:13	2024-06-24 11:13:40	2024-12-31 10:13:40	1	453	0.333	33.028
C:\Users\user-1\Desktop\My_PHD\5_Redaction_These\Chap2_Metabarcoding & Census\Census\1_Data_Collection\Dossier4\C027\Xerus erythropus\DSCF0103.JPG	DSCF0103.JPG	405682	768980	GardePro	10s	120	0.6	30	2024-06-24	11:13:40	2024-12-31	10:13:40	2024:07:02	2024-07-02	18:46:05	4.913	C027	Xerus erythropus	5	-30	DF	1322.08	3769.26	Koto	3302.8	2024-07-02 18:46:05	2024-06-24 11:13:40	2024-12-31 10:13:40	1	454	0.333	33.028
C:\Users\user-1\Desktop\My_PHD\5_Redaction_These\Chap2_Metabarcoding & Census\Census\1_Data_Collection\Dossier4\C027\Xerus erythropus\DSCF0104.JPG	DSCF0104.JPG	405682	768980	GardePro	10s	120	0.6	30	2024-06-24	11:13:40	2024-12-31	10:13:40	2024:07:02	2024-07-02	18:46:06	4.914	C027	Xerus erythropus	5	-30	DF	1322.08	3769.26	Koto	3302.8	2024-07-02 18:46:06	2024-06-24 11:13:40	2024-12-31 10:13:40	1	455	0.333	33.028
C:\Users\user-1\Desktop\My_PHD\5_Redaction_These\Chap2_Metabarcoding & Census\Census\1_Data_Collection\Dossier5\C033\Cricetomys gambianus\DSCF0073.JPG	DSCF0073.JPG	403721	769978	GardePro	10s	120	0.6	30	2024-06-27	13:20:57	2024-12-31	12:20:57	2024:07:02	2024-07-02	2:41:20	0.704	C033	Cricetomys gambianus	4.2	-20	DF	394.703	1701.99	Koto	3302.8	2024-07-02 2:41:20	2024-06-27 13:20:57	2024-12-31 12:20:57	1	456	0.333	33.028
C:\Users\user-1\Desktop\My_PHD\5_Redaction_These\Chap2_Metabarcoding & Census\Census\1_Data_Collection\Dossier5\C033\Cricetomys gambianus\DSCF0074.JPG	DSCF0074.JPG	403721	769978	GardePro	10s	120	0.6	30	2024-06-27	13:20:57	2024-12-31	12:20:57	2024:07:02	2024-07-02	2:41:20	0.704	C033	Cricetomys gambianus	4.5	0	DF	394.703	1701.99	Koto	3302.8	2024-07-02 2:41:20	2024-06-27 13:20:57	2024-12-31 12:20:57	1	457	0.333	33.028
C:\Users\user-1\Desktop\My_PHD\5_Redaction_These\Chap2_Metabarcoding & Census\Census\1_Data_Collection\Dossier5\C033\Cricetomys gambianus\DSCF0075.JPG	DSCF0075.JPG	403721	769978	GardePro	10s	120	0.6	30	2024-06-27	13:20:57	2024-12-31	12:20:57	2024:07:02	2024-07-02	3:17:50	0.863	C033	Cricetomys gambianus	4.2	-25	DF	394.703	1701.99	Koto	3302.8	2024-07-02 3:17:50	2024-06-27 13:20:57	2024-12-31 12:20:57	1	458	0.333	33.028
C:\Users\user-1\Desktop\My_PHD\5_Redaction_These\Chap2_Metabarcoding & Census\Census\1_Data_Collection\Dossier5\C033\Cricetomys gambianus\DSCF0076.JPG	DSCF0076.JPG	403721	769978	GardePro	10s	120	0.6	30	2024-06-27	13:20:57	2024-12-31	12:20:57	2024:07:02	2024-07-02	3:17:50	0.863	C033	Cricetomys gambianus	4.3	-20	DF	394.703	1701.99	Koto	3302.8	2024-07-02 3:17:50	2024-06-27 13:20:57	2024-12-31 12:20:57	1	459	0.333	33.028
C:\Users\user-1\Desktop\My_PHD\5_Redaction_These\Chap2_Metabarcoding & Census\Census\1_Data_Collection\Dossier5\C033\Cricetomys gambianus\DSCF0077.JPG	DSCF0077.JPG	403721	769978	GardePro	10s	120	0.6	30	2024-06-27	13:20:57	2024-12-31	12:20:57	2024:07:02	2024-07-02	3:17:57	0.864	C033	Cricetomys gambianus	6	20	DF	394.703	1701.99	Koto	3302.8	2024-07-02 3:17:57	2024-06-27 13:20:57	2024-12-31 12:20:57	1	460	0.333	33.028
C:\Users\user-1\Desktop\My_PHD\5_Redaction_These\Chap2_Metabarcoding & Census\Census\1_Data_Collection\Dossier5\C033\Cricetomys gambianus\DSCF0078.JPG	DSCF0078.JPG	403721	769978	GardePro	10s	120	0.6	30	2024-06-27	13:20:57	2024-12-31	12:20:57	2024:07:02	2024-07-02	3:17:57	0.864	C033	Cricetomys gambianus	6	25	DF	394.703	1701.99	Koto	3302.8	2024-07-02 3:17:57	2024-06-27 13:20:57	2024-12-31 12:20:57	1	461	0.333	33.028
C:\Users\user-1\Desktop\My_PHD\5_Redaction_These\Chap2_Metabarcoding & Census\Census\1_Data_Collection\Dossier5\C037\Cercopithecus mona\07020011.JPG	07020011.JPG	407721	769948	BUSHNEL	10s	35	0.6	33.5	2024-06-27	9:13:11	2024-12-31	8:13:11	2024:07:02	2024-07-02	13:20:02	3.491	C037	Cercopithecus mona	3	16	DF	502.305	1649.58	Zalime	3302.8	2024-07-02 13:20:02	2024-06-27 9:13:11	2024-12-31 8:13:11	1	462	0.097	33.028
C:\Users\user-1\Desktop\My_PHD\5_Redaction_These\Chap2_Metabarcoding & Census\Census\1_Data_Collection\Dossier5\C037\Cercopithecus mona\07020012.JPG	07020012.JPG	407721	769948	BUSHNEL	10s	35	0.6	33.5	2024-06-27	9:13:11	2024-12-31	8:13:11	2024:07:02	2024-07-02	13:20:03	3.491	C037	Cercopithecus mona	4	-9	DF	502.305	1649.58	Zalime	3302.8	2024-07-02 13:20:03	2024-06-27 9:13:11	2024-12-31 8:13:11	1	463	0.097	33.028
C:\Users\user-1\Desktop\My_PHD\5_Redaction_These\Chap2_Metabarcoding & Census\Census\1_Data_Collection\Dossier2\C019\Philantomba walteri\07020029.JPG	07020029.JPG	404700	767950	BUSHNEL	10s	35	0.6	33.5	2024-06-26	12:02:59	2024-12-31	11:02:59	2024:07:02	2024-07-02	13:09:13	3.44361	C019	Philantomba walteri	1.2	17.5	DF	1711.1	3936.84	Koto	3302.8	2024-07-02 13:09:13	2024-06-26 12:02:59	2024-12-31 11:02:59	1	464	0.097	33.028
C:\Users\user-1\Desktop\My_PHD\5_Redaction_These\Chap2_Metabarcoding & Census\Census\1_Data_Collection\Dossier2\C019\Philantomba walteri\07020030.JPG	07020030.JPG	404700	767950	BUSHNEL	10s	35	0.6	33.5	2024-06-26	12:02:59	2024-12-31	11:02:59	2024:07:02	2024-07-02	13:09:13	3.44361	C019	Philantomba walteri	1.2	17.5	DF	1711.1	3936.84	Koto	3302.8	2024-07-02 13:09:13	2024-06-26 12:02:59	2024-12-31 11:02:59	1	465	0.097	33.028
C:\Users\user-1\Desktop\My_PHD\5_Redaction_These\Chap2_Metabarcoding & Census\Census\1_Data_Collection\Dossier4\C027\Tragelaphus scriptus\DSCF0105.JPG	DSCF0105.JPG	405682	768980	GardePro	10s	120	0.6	30	2024-06-24	11:13:40	2024-12-31	10:13:40	2024:07:03	2024-07-03	2:13:09	0.581	C027	Tragelaphus scriptus	7.5	-40	DF	1322.08	3769.26	Koto	3302.8	2024-07-03 2:13:09	2024-06-24 11:13:40	2024-12-31 10:13:40	1	466	0.333	33.028
C:\Users\user-1\Desktop\My_PHD\5_Redaction_These\Chap2_Metabarcoding & Census\Census\1_Data_Collection\Dossier4\C027\Tragelaphus scriptus\DSCF0106.JPG	DSCF0106.JPG	405682	768980	GardePro	10s	120	0.6	30	2024-06-24	11:13:40	2024-12-31	10:13:40	2024:07:03	2024-07-03	2:13:10	0.581	C027	Tragelaphus scriptus	7.5	-40	DF	1322.08	3769.26	Koto	3302.8	2024-07-03 2:13:10	2024-06-24 11:13:40	2024-12-31 10:13:40	1	467	0.333	33.028
C:\Users\user-1\Desktop\My_PHD\5_Redaction_These\Chap2_Metabarcoding & Census\Census\1_Data_Collection\Dossier4\C027\Tragelaphus scriptus\DSCF0107.JPG	DSCF0107.JPG	405682	768980	GardePro	10s	120	0.6	30	2024-06-24	11:13:40	2024-12-31	10:13:40	2024:07:03	2024-07-03	2:13:14	0.581	C027	Tragelaphus scriptus	7.5	-30	DF	1322.08	3769.26	Koto	3302.8	2024-07-03 2:13:14	2024-06-24 11:13:40	2024-12-31 10:13:40	1	468	0.333	33.028
C:\Users\user-1\Desktop\My_PHD\5_Redaction_These\Chap2_Metabarcoding & Census\Census\1_Data_Collection\Dossier4\C027\Tragelaphus scriptus\DSCF0108.JPG	DSCF0108.JPG	405682	768980	GardePro	10s	120	0.6	30	2024-06-24	11:13:40	2024-12-31	10:13:40	2024:07:03	2024-07-03	2:13:15	0.581	C027	Tragelaphus scriptus	7.5	-30	DF	1322.08	3769.26	Koto	3302.8	2024-07-03 2:13:15	2024-06-24 11:13:40	2024-12-31 10:13:40	1	469	0.333	33.028
C:\Users\user-1\Desktop\My_PHD\5_Redaction_These\Chap2_Metabarcoding & Census\Census\1_Data_Collection\Dossier4\C027\Tragelaphus scriptus\DSCF0109.JPG	DSCF0109.JPG	405682	768980	GardePro	10s	120	0.6	30	2024-06-24	11:13:40	2024-12-31	10:13:40	2024:07:03	2024-07-03	2:13:21	0.582	C027	Tragelaphus scriptus	5	-15	DF	1322.08	3769.26	Koto	3302.8	2024-07-03 2:13:21	2024-06-24 11:13:40	2024-12-31 10:13:40	1	470	0.333	33.028
C:\Users\user-1\Desktop\My_PHD\5_Redaction_These\Chap2_Metabarcoding & Census\Census\1_Data_Collection\Dossier4\C027\Tragelaphus scriptus\DSCF0110.JPG	DSCF0110.JPG	405682	768980	GardePro	10s	120	0.6	30	2024-06-24	11:13:40	2024-12-31	10:13:40	2024:07:03	2024-07-03	2:13:22	0.582	C027	Tragelaphus scriptus	5	-20	DF	1322.08	3769.26	Koto	3302.8	2024-07-03 2:13:22	2024-06-24 11:13:40	2024-12-31 10:13:40	1	471	0.333	33.028
C:\Users\user-1\Desktop\My_PHD\5_Redaction_These\Chap2_Metabarcoding & Census\Census\1_Data_Collection\Dossier4\C027\Tragelaphus scriptus\DSCF0111.JPG	DSCF0111.JPG	405682	768980	GardePro	10s	120	0.6	30	2024-06-24	11:13:40	2024-12-31	10:13:40	2024:07:03	2024-07-03	2:13:27	0.582	C027	Tragelaphus scriptus	0.5	-60	DF	1322.08	3769.26	Koto	3302.8	2024-07-03 2:13:27	2024-06-24 11:13:40	2024-12-31 10:13:40	1	472	0.333	33.028
C:\Users\user-1\Desktop\My_PHD\5_Redaction_These\Chap2_Metabarcoding & Census\Census\1_Data_Collection\Dossier4\C027\Tragelaphus scriptus\DSCF0112.JPG	DSCF0112.JPG	405682	768980	GardePro	10s	120	0.6	30	2024-06-24	11:13:40	2024-12-31	10:13:40	2024:07:03	2024-07-03	2:13:27	0.582	C027	Tragelaphus scriptus	0.5	-60	DF	1322.08	3769.26	Koto	3302.8	2024-07-03 2:13:27	2024-06-24 11:13:40	2024-12-31 10:13:40	1	473	0.333	33.028
C:\Users\user-1\Desktop\My_PHD\5_Redaction_These\Chap2_Metabarcoding & Census\Census\1_Data_Collection\Dossier4\C027\Tragelaphus scriptus\DSCF0113.JPG	DSCF0113.JPG	405682	768980	GardePro	10s	120	0.6	30	2024-06-24	11:13:40	2024-12-31	10:13:40	2024:07:03	2024-07-03	19:45:22	5.172	C027	Tragelaphus scriptus	7.5	40	DF	1322.08	3769.26	Koto	3302.8	2024-07-03 19:45:22	2024-06-24 11:13:40	2024-12-31 10:13:40	1	474	0.333	33.028
C:\Users\user-1\Desktop\My_PHD\5_Redaction_These\Chap2_Metabarcoding & Census\Census\1_Data_Collection\Dossier4\C027\Tragelaphus scriptus\DSCF0114.JPG	DSCF0114.JPG	405682	768980	GardePro	10s	120	0.6	30	2024-06-24	11:13:40	2024-12-31	10:13:40	2024:07:03	2024-07-03	19:45:23	5.172	C027	Tragelaphus scriptus	7.5	40	DF	1322.08	3769.26	Koto	3302.8	2024-07-03 19:45:23	2024-06-24 11:13:40	2024-12-31 10:13:40	1	475	0.333	33.028
C:\Users\user-1\Desktop\My_PHD\5_Redaction_These\Chap2_Metabarcoding & Census\Census\1_Data_Collection\Dossier4\C027\Tragelaphus scriptus\DSCF0115.JPG	DSCF0115.JPG	405682	768980	GardePro	10s	120	0.6	30	2024-06-24	11:13:40	2024-12-31	10:13:40	2024:07:03	2024-07-03	19:45:27	5.173	C027	Tragelaphus scriptus	7.5	25	DF	1322.08	3769.26	Koto	3302.8	2024-07-03 19:45:27	2024-06-24 11:13:40	2024-12-31 10:13:40	1	476	0.333	33.028
C:\Users\user-1\Desktop\My_PHD\5_Redaction_These\Chap2_Metabarcoding & Census\Census\1_Data_Collection\Dossier4\C027\Tragelaphus scriptus\DSCF0116.JPG	DSCF0116.JPG	405682	768980	GardePro	10s	120	0.6	30	2024-06-24	11:13:40	2024-12-31	10:13:40	2024:07:03	2024-07-03	19:45:28	5.173	C027	Tragelaphus scriptus	7.5	20	DF	1322.08	3769.26	Koto	3302.8	2024-07-03 19:45:28	2024-06-24 11:13:40	2024-12-31 10:13:40	1	477	0.333	33.028
C:\Users\user-1\Desktop\My_PHD\5_Redaction_These\Chap2_Metabarcoding & Census\Census\1_Data_Collection\Dossier4\C027\Tragelaphus scriptus\DSCF0117.JPG	DSCF0117.JPG	405682	768980	GardePro	10s	120	0.6	30	2024-06-24	11:13:40	2024-12-31	10:13:40	2024:07:03	2024-07-03	19:46:07	5.175	C027	Tragelaphus scriptus	7.5	0	DF	1322.08	3769.26	Koto	3302.8	2024-07-03 19:46:07	2024-06-24 11:13:40	2024-12-31 10:13:40	1	478	0.333	33.028
C:\Users\user-1\Desktop\My_PHD\5_Redaction_These\Chap2_Metabarcoding & Census\Census\1_Data_Collection\Dossier4\C027\Tragelaphus scriptus\DSCF0118.JPG	DSCF0118.JPG	405682	768980	GardePro	10s	120	0.6	30	2024-06-24	11:13:40	2024-12-31	10:13:40	2024:07:03	2024-07-03	19:46:08	5.175	C027	Tragelaphus scriptus	7.5	0	DF	1322.08	3769.26	Koto	3302.8	2024-07-03 19:46:08	2024-06-24 11:13:40	2024-12-31 10:13:40	1	479	0.333	33.028
C:\Users\user-1\Desktop\My_PHD\5_Redaction_These\Chap2_Metabarcoding & Census\Census\1_Data_Collection\Dossier4\C027\Tragelaphus scriptus\DSCF0119.JPG	DSCF0119.JPG	405682	768980	GardePro	10s	120	0.6	30	2024-06-24	11:13:40	2024-12-31	10:13:40	2024:07:03	2024-07-03	19:46:13	5.176	C027	Tragelaphus scriptus	7.5	-20	DF	1322.08	3769.26	Koto	3302.8	2024-07-03 19:46:13	2024-06-24 11:13:40	2024-12-31 10:13:40	1	480	0.333	33.028
C:\Users\user-1\Desktop\My_PHD\5_Redaction_These\Chap2_Metabarcoding & Census\Census\1_Data_Collection\Dossier4\C027\Tragelaphus scriptus\DSCF0120.JPG	DSCF0120.JPG	405682	768980	GardePro	10s	120	0.6	30	2024-06-24	11:13:40	2024-12-31	10:13:40	2024:07:03	2024-07-03	19:46:13	5.176	C027	Tragelaphus scriptus	7.5	-20	DF	1322.08	3769.26	Koto	3302.8	2024-07-03 19:46:13	2024-06-24 11:13:40	2024-12-31 10:13:40	1	481	0.333	33.028
C:\Users\user-1\Desktop\My_PHD\5_Redaction_These\Chap2_Metabarcoding & Census\Census\1_Data_Collection\Dossier4\C027\Tragelaphus scriptus\DSCF0121.JPG	DSCF0121.JPG	405682	768980	GardePro	10s	120	0.6	30	2024-06-24	11:13:40	2024-12-31	10:13:40	2024:07:03	2024-07-03	19:46:32	5.177	C027	Tragelaphus scriptus	7.5	-30	DF	1322.08	3769.26	Koto	3302.8	2024-07-03 19:46:32	2024-06-24 11:13:40	2024-12-31 10:13:40	1	482	0.333	33.028
C:\Users\user-1\Desktop\My_PHD\5_Redaction_These\Chap2_Metabarcoding & Census\Census\1_Data_Collection\Dossier4\C027\Tragelaphus scriptus\DSCF0122.JPG	DSCF0122.JPG	405682	768980	GardePro	10s	120	0.6	30	2024-06-24	11:13:40	2024-12-31	10:13:40	2024:07:03	2024-07-03	19:46:32	5.177	C027	Tragelaphus scriptus	7.5	-30	DF	1322.08	3769.26	Koto	3302.8	2024-07-03 19:46:32	2024-06-24 11:13:40	2024-12-31 10:13:40	1	483	0.333	33.028
C:\Users\user-1\Desktop\My_PHD\5_Redaction_These\Chap2_Metabarcoding & Census\Census\1_Data_Collection\Dossier4\C027\Tragelaphus scriptus\DSCF0123.JPG	DSCF0123.JPG	405682	768980	GardePro	10s	120	0.6	30	2024-06-24	11:13:40	2024-12-31	10:13:40	2024:07:03	2024-07-03	19:46:37	5.178	C027	Tragelaphus scriptus	7.5	-30	DF	1322.08	3769.26	Koto	3302.8	2024-07-03 19:46:37	2024-06-24 11:13:40	2024-12-31 10:13:40	1	484	0.333	33.028
C:\Users\user-1\Desktop\My_PHD\5_Redaction_These\Chap2_Metabarcoding & Census\Census\1_Data_Collection\Dossier4\C027\Tragelaphus scriptus\DSCF0124.JPG	DSCF0124.JPG	405682	768980	GardePro	10s	120	0.6	30	2024-06-24	11:13:40	2024-12-31	10:13:40	2024:07:03	2024-07-03	19:46:37	5.178	C027	Tragelaphus scriptus	7.5	-30	DF	1322.08	3769.26	Koto	3302.8	2024-07-03 19:46:37	2024-06-24 11:13:40	2024-12-31 10:13:40	1	485	0.333	33.028
C:\Users\user-1\Desktop\My_PHD\5_Redaction_These\Chap2_Metabarcoding & Census\Census\1_Data_Collection\Dossier4\C027\Tragelaphus scriptus\DSCF0125.JPG	DSCF0125.JPG	405682	768980	GardePro	10s	120	0.6	30	2024-06-24	11:13:40	2024-12-31	10:13:40	2024:07:03	2024-07-03	19:46:57	5.179	C027	Tragelaphus scriptus	7.5	-30	DF	1322.08	3769.26	Koto	3302.8	2024-07-03 19:46:57	2024-06-24 11:13:40	2024-12-31 10:13:40	1	486	0.333	33.028
C:\Users\user-1\Desktop\My_PHD\5_Redaction_These\Chap2_Metabarcoding & Census\Census\1_Data_Collection\Dossier4\C027\Tragelaphus scriptus\DSCF0126.JPG	DSCF0126.JPG	405682	768980	GardePro	10s	120	0.6	30	2024-06-24	11:13:40	2024-12-31	10:13:40	2024:07:03	2024-07-03	19:46:57	5.179	C027	Tragelaphus scriptus	7.5	-35	DF	1322.08	3769.26	Koto	3302.8	2024-07-03 19:46:57	2024-06-24 11:13:40	2024-12-31 10:13:40	1	487	0.333	33.028
C:\Users\user-1\Desktop\My_PHD\5_Redaction_These\Chap2_Metabarcoding & Census\Census\1_Data_Collection\Dossier4\C027\Tragelaphus scriptus\DSCF0127.JPG	DSCF0127.JPG	405682	768980	GardePro	10s	120	0.6	30	2024-06-24	11:13:40	2024-12-31	10:13:40	2024:07:03	2024-07-03	19:49:05	5.188	C027	Tragelaphus scriptus	3	45	DF	1322.08	3769.26	Koto	3302.8	2024-07-03 19:49:05	2024-06-24 11:13:40	2024-12-31 10:13:40	1	488	0.333	33.028
C:\Users\user-1\Desktop\My_PHD\5_Redaction_These\Chap2_Metabarcoding & Census\Census\1_Data_Collection\Dossier4\C027\Tragelaphus scriptus\DSCF0128.JPG	DSCF0128.JPG	405682	768980	GardePro	10s	120	0.6	30	2024-06-24	11:13:40	2024-12-31	10:13:40	2024:07:03	2024-07-03	19:49:05	5.188	C027	Tragelaphus scriptus	3	45	DF	1322.08	3769.26	Koto	3302.8	2024-07-03 19:49:05	2024-06-24 11:13:40	2024-12-31 10:13:40	1	489	0.333	33.028
C:\Users\user-1\Desktop\My_PHD\5_Redaction_These\Chap2_Metabarcoding & Census\Census\1_Data_Collection\Dossier4\C027\Tragelaphus scriptus\DSCF0129.JPG	DSCF0129.JPG	405682	768980	GardePro	10s	120	0.6	30	2024-06-24	11:13:40	2024-12-31	10:13:40	2024:07:03	2024-07-03	19:49:10	5.189	C027	Tragelaphus scriptus	3.5	45	DF	1322.08	3769.26	Koto	3302.8	2024-07-03 19:49:10	2024-06-24 11:13:40	2024-12-31 10:13:40	1	490	0.333	33.028
C:\Users\user-1\Desktop\My_PHD\5_Redaction_These\Chap2_Metabarcoding & Census\Census\1_Data_Collection\Dossier4\C027\Tragelaphus scriptus\DSCF0130.JPG	DSCF0130.JPG	405682	768980	GardePro	10s	120	0.6	30	2024-06-24	11:13:40	2024-12-31	10:13:40	2024:07:03	2024-07-03	19:49:10	5.189	C027	Tragelaphus scriptus	4	0	DF	1322.08	3769.26	Koto	3302.8	2024-07-03 19:49:10	2024-06-24 11:13:40	2024-12-31 10:13:40	1	491	0.333	33.028
C:\Users\user-1\Desktop\My_PHD\5_Redaction_These\Chap2_Metabarcoding & Census\Census\1_Data_Collection\Dossier4\C027\Tragelaphus scriptus\DSCF0131.JPG	DSCF0131.JPG	405682	768980	GardePro	10s	120	0.6	30	2024-06-24	11:13:40	2024-12-31	10:13:40	2024:07:03	2024-07-03	19:49:16	5.189	C027	Tragelaphus scriptus	5.5	-37	DF	1322.08	3769.26	Koto	3302.8	2024-07-03 19:49:16	2024-06-24 11:13:40	2024-12-31 10:13:40	1	492	0.333	33.028
C:\Users\user-1\Desktop\My_PHD\5_Redaction_These\Chap2_Metabarcoding & Census\Census\1_Data_Collection\Dossier4\C027\Tragelaphus scriptus\DSCF0132.JPG	DSCF0132.JPG	405682	768980	GardePro	10s	120	0.6	30	2024-06-24	11:13:40	2024-12-31	10:13:40	2024:07:03	2024-07-03	19:49:16	5.189	C027	Tragelaphus scriptus	5.5	-37	DF	1322.08	3769.26	Koto	3302.8	2024-07-03 19:49:16	2024-06-24 11:13:40	2024-12-31 10:13:40	1	493	0.333	33.028
C:\Users\user-1\Desktop\My_PHD\5_Redaction_These\Chap2_Metabarcoding & Census\Census\1_Data_Collection\Dossier4\C032\Chlorocebus tantalus\DSCF0001.JPG	DSCF0001.JPG	402666	769980	GardePro	10s	120	0.6	30	2024-07-01	10:18:13	2024-12-31	9:18:13	2024:07:03	2024-07-03	13:03:36	3.419	C032	Chlorocebus tantalus	4	40	CF	486.646	1491.22	Koto	1050.91	2024-07-03 13:03:36	2024-07-01 10:18:13	2024-12-31 9:18:13	1	494	0.333	10.5091
C:\Users\user-1\Desktop\My_PHD\5_Redaction_These\Chap2_Metabarcoding & Census\Census\1_Data_Collection\Dossier4\C032\Chlorocebus tantalus\DSCF0002.JPG	DSCF0002.JPG	402666	769980	GardePro	10s	120	0.6	30	2024-07-01	10:18:13	2024-12-31	9:18:13	2024:07:03	2024-07-03	13:03:36	3.419	C032	Chlorocebus tantalus	4	40	CF	486.646	1491.22	Koto	1050.91	2024-07-03 13:03:36	2024-07-01 10:18:13	2024-12-31 9:18:13	1	495	0.333	10.5091
C:\Users\user-1\Desktop\My_PHD\5_Redaction_These\Chap2_Metabarcoding & Census\Census\1_Data_Collection\Dossier4\C032\Chlorocebus tantalus\DSCF0003.JPG	DSCF0003.JPG	402666	769980	GardePro	10s	120	0.6	30	2024-07-01	10:18:13	2024-12-31	9:18:13	2024:07:03	2024-07-03	13:03:44	3.42	C032	Chlorocebus tantalus	5.5	47	CF	486.646	1491.22	Koto	1050.91	2024-07-03 13:03:44	2024-07-01 10:18:13	2024-12-31 9:18:13	1	496	0.333	10.5091
C:\Users\user-1\Desktop\My_PHD\5_Redaction_These\Chap2_Metabarcoding & Census\Census\1_Data_Collection\Dossier4\C032\Chlorocebus tantalus\DSCF0004.JPG	DSCF0004.JPG	402666	769980	GardePro	10s	120	0.6	30	2024-07-01	10:18:13	2024-12-31	9:18:13	2024:07:03	2024-07-03	13:03:44	3.42	C032	Chlorocebus tantalus	5.5	47	CF	486.646	1491.22	Koto	1050.91	2024-07-03 13:03:44	2024-07-01 10:18:13	2024-12-31 9:18:13	1	497	0.333	10.5091
C:\Users\user-1\Desktop\My_PHD\5_Redaction_These\Chap2_Metabarcoding & Census\Census\1_Data_Collection\Dossier2\C017\Crossarchus obscurus\07040009.JPG	07040009.JPG	402704	767963	BUSHNEL	10s	35	0.6	33.5	2024-06-26	14:55:12	2024-12-31	13:55:12	2024:07:04	2024-07-04	6:47:12	1.777	C017	Crossarchus platycephalus	3	9	DF	2132.22	3486.06	Koto	3302.8	2024-07-04 6:47:12	2024-06-26 14:55:12	2024-12-31 13:55:12	1	498	0.097	33.028
C:\Users\user-1\Desktop\My_PHD\5_Redaction_These\Chap2_Metabarcoding & Census\Census\1_Data_Collection\Dossier2\C017\Crossarchus obscurus\07040009.JPG	07040009.JPG	402704	767963	BUSHNEL	10s	35	0.6	33.5	2024-06-26	14:55:12	2024-12-31	13:55:12	2024:07:04	2024-07-04	6:47:12	1.777	C017	Crossarchus platycephalus	3	9	DF	2132.22	3486.06	Koto	3302.8	2024-07-04 6:47:12	2024-06-26 14:55:12	2024-12-31 13:55:12	1	499	0.097	33.028
C:\Users\user-1\Desktop\My_PHD\5_Redaction_These\Chap2_Metabarcoding & Census\Census\1_Data_Collection\Dossier2\C017\Crossarchus obscurus\07040010.JPG	07040010.JPG	402704	767963	BUSHNEL	10s	35	0.6	33.5	2024-06-26	14:55:12	2024-12-31	13:55:12	2024:07:04	2024-07-04	6:47:12	1.777	C017	Crossarchus platycephalus	3	9	DF	2132.22	3486.06	Koto	3302.8	2024-07-04 6:47:12	2024-06-26 14:55:12	2024-12-31 13:55:12	1	500	0.097	33.028
C:\Users\user-1\Desktop\My_PHD\5_Redaction_These\Chap2_Metabarcoding & Census\Census\1_Data_Collection\Dossier2\C017\Crossarchus obscurus\07040010.JPG	07040010.JPG	402704	767963	BUSHNEL	10s	35	0.6	33.5	2024-06-26	14:55:12	2024-12-31	13:55:12	2024:07:04	2024-07-04	6:47:12	1.777	C017	Crossarchus platycephalus	3	9	DF	2132.22	3486.06	Koto	3302.8	2024-07-04 6:47:12	2024-06-26 14:55:12	2024-12-31 13:55:12	1	501	0.097	33.028
C:\Users\user-1\Desktop\My_PHD\5_Redaction_These\Chap2_Metabarcoding & Census\Census\1_Data_Collection\Dossier2\C017\Crossarchus obscurus\07040011.JPG	07040011.JPG	402704	767963	BUSHNEL	10s	35	0.6	33.5	2024-06-26	14:55:12	2024-12-31	13:55:12	2024:07:04	2024-07-04	6:47:24	1.778	C017	Crossarchus platycephalus	3	9	DF	2132.22	3486.06	Koto	3302.8	2024-07-04 6:47:24	2024-06-26 14:55:12	2024-12-31 13:55:12	1	502	0.097	33.028
C:\Users\user-1\Desktop\My_PHD\5_Redaction_These\Chap2_Metabarcoding & Census\Census\1_Data_Collection\Dossier2\C017\Crossarchus obscurus\07040011.JPG	07040011.JPG	402704	767963	BUSHNEL	10s	35	0.6	33.5	2024-06-26	14:55:12	2024-12-31	13:55:12	2024:07:04	2024-07-04	6:47:24	1.778	C017	Crossarchus platycephalus	3	9	DF	2132.22	3486.06	Koto	3302.8	2024-07-04 6:47:24	2024-06-26 14:55:12	2024-12-31 13:55:12	1	503	0.097	33.028
C:\Users\user-1\Desktop\My_PHD\5_Redaction_These\Chap2_Metabarcoding & Census\Census\1_Data_Collection\Dossier2\C017\Crossarchus obscurus\07040011.JPG	07040011.JPG	402704	767963	BUSHNEL	10s	35	0.6	33.5	2024-06-26	14:55:12	2024-12-31	13:55:12	2024:07:04	2024-07-04	6:47:24	1.778	C017	Crossarchus platycephalus	3	9	DF	2132.22	3486.06	Koto	3302.8	2024-07-04 6:47:24	2024-06-26 14:55:12	2024-12-31 13:55:12	1	504	0.097	33.028
C:\Users\user-1\Desktop\My_PHD\5_Redaction_These\Chap2_Metabarcoding & Census\Census\1_Data_Collection\Dossier2\C017\Crossarchus obscurus\07040012.JPG	07040012.JPG	402704	767963	BUSHNEL	10s	35	0.6	33.5	2024-06-26	14:55:12	2024-12-31	13:55:12	2024:07:04	2024-07-04	6:47:24	1.778	C017	Crossarchus platycephalus	3	11	DF	2132.22	3486.06	Koto	3302.8	2024-07-04 6:47:24	2024-06-26 14:55:12	2024-12-31 13:55:12	1	505	0.097	33.028
C:\Users\user-1\Desktop\My_PHD\5_Redaction_These\Chap2_Metabarcoding & Census\Census\1_Data_Collection\Dossier2\C017\Crossarchus obscurus\07040012.JPG	07040012.JPG	402704	767963	BUSHNEL	10s	35	0.6	33.5	2024-06-26	14:55:12	2024-12-31	13:55:12	2024:07:04	2024-07-04	6:47:24	1.778	C017	Crossarchus platycephalus	3	11	DF	2132.22	3486.06	Koto	3302.8	2024-07-04 6:47:24	2024-06-26 14:55:12	2024-12-31 13:55:12	1	506	0.097	33.028
C:\Users\user-1\Desktop\My_PHD\5_Redaction_These\Chap2_Metabarcoding & Census\Census\1_Data_Collection\Dossier2\C017\Crossarchus obscurus\07040012.JPG	07040012.JPG	402704	767963	BUSHNEL	10s	35	0.6	33.5	2024-06-26	14:55:12	2024-12-31	13:55:12	2024:07:04	2024-07-04	6:47:24	1.778	C017	Crossarchus platycephalus	3	11	DF	2132.22	3486.06	Koto	3302.8	2024-07-04 6:47:24	2024-06-26 14:55:12	2024-12-31 13:55:12	1	507	0.097	33.028
C:\Users\user-1\Desktop\My_PHD\5_Redaction_These\Chap2_Metabarcoding & Census\Census\1_Data_Collection\Dossier2\C017\Crossarchus obscurus\07040013.JPG	07040013.JPG	402704	767963	BUSHNEL	10s	35	0.6	33.5	2024-06-26	14:55:12	2024-12-31	13:55:12	2024:07:04	2024-07-04	6:47:36	1.778	C017	Crossarchus platycephalus	3	12	DF	2132.22	3486.06	Koto	3302.8	2024-07-04 6:47:36	2024-06-26 14:55:12	2024-12-31 13:55:12	1	508	0.097	33.028
C:\Users\user-1\Desktop\My_PHD\5_Redaction_These\Chap2_Metabarcoding & Census\Census\1_Data_Collection\Dossier2\C017\Crossarchus obscurus\07040013.JPG	07040013.JPG	402704	767963	BUSHNEL	10s	35	0.6	33.5	2024-06-26	14:55:12	2024-12-31	13:55:12	2024:07:04	2024-07-04	6:47:36	1.778	C017	Crossarchus platycephalus	3	12	DF	2132.22	3486.06	Koto	3302.8	2024-07-04 6:47:36	2024-06-26 14:55:12	2024-12-31 13:55:12	1	509	0.097	33.028
C:\Users\user-1\Desktop\My_PHD\5_Redaction_These\Chap2_Metabarcoding & Census\Census\1_Data_Collection\Dossier2\C017\Crossarchus obscurus\07040013.JPG	07040013.JPG	402704	767963	BUSHNEL	10s	35	0.6	33.5	2024-06-26	14:55:12	2024-12-31	13:55:12	2024:07:04	2024-07-04	6:47:36	1.778	C017	Crossarchus platycephalus	3	12	DF	2132.22	3486.06	Koto	3302.8	2024-07-04 6:47:36	2024-06-26 14:55:12	2024-12-31 13:55:12	1	510	0.097	33.028
C:\Users\user-1\Desktop\My_PHD\5_Redaction_These\Chap2_Metabarcoding & Census\Census\1_Data_Collection\Dossier2\C017\Crossarchus obscurus\07040014.JPG	07040014.JPG	402704	767963	BUSHNEL	10s	35	0.6	33.5	2024-06-26	14:55:12	2024-12-31	13:55:12	2024:07:04	2024-07-04	6:47:36	1.778	C017	Crossarchus platycephalus	3	15	DF	2132.22	3486.06	Koto	3302.8	2024-07-04 6:47:36	2024-06-26 14:55:12	2024-12-31 13:55:12	1	511	0.097	33.028
C:\Users\user-1\Desktop\My_PHD\5_Redaction_These\Chap2_Metabarcoding & Census\Census\1_Data_Collection\Dossier2\C017\Crossarchus obscurus\07040014.JPG	07040014.JPG	402704	767963	BUSHNEL	10s	35	0.6	33.5	2024-06-26	14:55:12	2024-12-31	13:55:12	2024:07:04	2024-07-04	6:47:36	1.778	C017	Crossarchus platycephalus	3	15	DF	2132.22	3486.06	Koto	3302.8	2024-07-04 6:47:36	2024-06-26 14:55:12	2024-12-31 13:55:12	1	512	0.097	33.028
C:\Users\user-1\Desktop\My_PHD\5_Redaction_These\Chap2_Metabarcoding & Census\Census\1_Data_Collection\Dossier2\C017\Crossarchus obscurus\07040014.JPG	07040014.JPG	402704	767963	BUSHNEL	10s	35	0.6	33.5	2024-06-26	14:55:12	2024-12-31	13:55:12	2024:07:04	2024-07-04	6:47:36	1.778	C017	Crossarchus platycephalus	3	15	DF	2132.22	3486.06	Koto	3302.8	2024-07-04 6:47:36	2024-06-26 14:55:12	2024-12-31 13:55:12	1	513	0.097	33.028
C:\Users\user-1\Desktop\My_PHD\5_Redaction_These\Chap2_Metabarcoding & Census\Census\1_Data_Collection\Dossier2\C017\Crossarchus obscurus\07040015.JPG	07040015.JPG	402704	767963	BUSHNEL	10s	35	0.6	33.5	2024-06-26	14:55:12	2024-12-31	13:55:12	2024:07:04	2024-07-04	6:47:51	1.78	C017	Crossarchus platycephalus	3	15	DF	2132.22	3486.06	Koto	3302.8	2024-07-04 6:47:51	2024-06-26 14:55:12	2024-12-31 13:55:12	1	514	0.097	33.028
C:\Users\user-1\Desktop\My_PHD\5_Redaction_These\Chap2_Metabarcoding & Census\Census\1_Data_Collection\Dossier2\C017\Crossarchus obscurus\07040015.JPG	07040015.JPG	402704	767963	BUSHNEL	10s	35	0.6	33.5	2024-06-26	14:55:12	2024-12-31	13:55:12	2024:07:04	2024-07-04	6:47:51	1.78	C017	Crossarchus platycephalus	3	15	DF	2132.22	3486.06	Koto	3302.8	2024-07-04 6:47:51	2024-06-26 14:55:12	2024-12-31 13:55:12	1	515	0.097	33.028
C:\Users\user-1\Desktop\My_PHD\5_Redaction_These\Chap2_Metabarcoding & Census\Census\1_Data_Collection\Dossier2\C017\Crossarchus obscurus\07040015.JPG	07040015.JPG	402704	767963	BUSHNEL	10s	35	0.6	33.5	2024-06-26	14:55:12	2024-12-31	13:55:12	2024:07:04	2024-07-04	6:47:51	1.78	C017	Crossarchus platycephalus	3	15	DF	2132.22	3486.06	Koto	3302.8	2024-07-04 6:47:51	2024-06-26 14:55:12	2024-12-31 13:55:12	1	516	0.097	33.028
C:\Users\user-1\Desktop\My_PHD\5_Redaction_These\Chap2_Metabarcoding & Census\Census\1_Data_Collection\Dossier2\C017\Crossarchus obscurus\07040016.JPG	07040016.JPG	402704	767963	BUSHNEL	10s	35	0.6	33.5	2024-06-26	14:55:12	2024-12-31	13:55:12	2024:07:04	2024-07-04	6:47:52	1.78	C017	Crossarchus platycephalus	3	16	DF	2132.22	3486.06	Koto	3302.8	2024-07-04 6:47:52	2024-06-26 14:55:12	2024-12-31 13:55:12	1	517	0.097	33.028
C:\Users\user-1\Desktop\My_PHD\5_Redaction_These\Chap2_Metabarcoding & Census\Census\1_Data_Collection\Dossier2\C017\Crossarchus obscurus\07040016.JPG	07040016.JPG	402704	767963	BUSHNEL	10s	35	0.6	33.5	2024-06-26	14:55:12	2024-12-31	13:55:12	2024:07:04	2024-07-04	6:47:52	1.78	C017	Crossarchus platycephalus	3	16	DF	2132.22	3486.06	Koto	3302.8	2024-07-04 6:47:52	2024-06-26 14:55:12	2024-12-31 13:55:12	1	518	0.097	33.028
C:\Users\user-1\Desktop\My_PHD\5_Redaction_These\Chap2_Metabarcoding & Census\Census\1_Data_Collection\Dossier2\C017\Crossarchus obscurus\07040016.JPG	07040016.JPG	402704	767963	BUSHNEL	10s	35	0.6	33.5	2024-06-26	14:55:12	2024-12-31	13:55:12	2024:07:04	2024-07-04	6:47:52	1.78	C017	Crossarchus platycephalus	3	16	DF	2132.22	3486.06	Koto	3302.8	2024-07-04 6:47:52	2024-06-26 14:55:12	2024-12-31 13:55:12	1	519	0.097	33.028
C:\Users\user-1\Desktop\My_PHD\5_Redaction_These\Chap2_Metabarcoding & Census\Census\1_Data_Collection\Dossier3\C023\Potamochoerus porcus\DSCF0011.JPG	DSCF0011.JPG	401833	769042	GardePro	10s	120	0.6	30	2024-07-01	13:50:17	2024-12-31	12:50:17	2024:07:04	2024-07-04	1:05:17	0.285	C023	Potamochoerus porcus	2.5	-45	DF	1610.83	2741.37	Koto	3302.8	2024-07-04 1:05:17	2024-07-01 13:50:17	2024-12-31 12:50:17	1	520	0.333	33.028
C:\Users\user-1\Desktop\My_PHD\5_Redaction_These\Chap2_Metabarcoding & Census\Census\1_Data_Collection\Dossier3\C023\Potamochoerus porcus\DSCF0012.JPG	DSCF0012.JPG	401833	769042	GardePro	10s	120	0.6	30	2024-07-01	13:50:17	2024-12-31	12:50:17	2024:07:04	2024-07-04	1:05:17	0.285	C023	Potamochoerus porcus	2.5	-45	DF	1610.83	2741.37	Koto	3302.8	2024-07-04 1:05:17	2024-07-01 13:50:17	2024-12-31 12:50:17	1	521	0.333	33.028
C:\Users\user-1\Desktop\My_PHD\5_Redaction_These\Chap2_Metabarcoding & Census\Census\1_Data_Collection\Dossier3\C023\Potamochoerus porcus\DSCF0013.JPG	DSCF0013.JPG	401833	769042	GardePro	10s	120	0.6	30	2024-07-01	13:50:17	2024-12-31	12:50:17	2024:07:04	2024-07-04	1:05:21	0.285	C023	Potamochoerus porcus	2.5	-45	DF	1610.83	2741.37	Koto	3302.8	2024-07-04 1:05:21	2024-07-01 13:50:17	2024-12-31 12:50:17	1	522	0.333	33.028
C:\Users\user-1\Desktop\My_PHD\5_Redaction_These\Chap2_Metabarcoding & Census\Census\1_Data_Collection\Dossier3\C023\Potamochoerus porcus\DSCF0014.JPG	DSCF0014.JPG	401833	769042	GardePro	10s	120	0.6	30	2024-07-01	13:50:17	2024-12-31	12:50:17	2024:07:04	2024-07-04	1:05:22	0.285	C023	Potamochoerus porcus	2.5	-45	DF	1610.83	2741.37	Koto	3302.8	2024-07-04 1:05:22	2024-07-01 13:50:17	2024-12-31 12:50:17	1	523	0.333	33.028
C:\Users\user-1\Desktop\My_PHD\5_Redaction_These\Chap2_Metabarcoding & Census\Census\1_Data_Collection\Dossier3\C023\Potamochoerus porcus\DSCF0015.JPG	DSCF0015.JPG	401833	769042	GardePro	10s	120	0.6	30	2024-07-01	13:50:17	2024-12-31	12:50:17	2024:07:04	2024-07-04	1:05:40	0.287	C023	Potamochoerus porcus	2.5	-45	DF	1610.83	2741.37	Koto	3302.8	2024-07-04 1:05:40	2024-07-01 13:50:17	2024-12-31 12:50:17	1	524	0.333	33.028
C:\Users\user-1\Desktop\My_PHD\5_Redaction_These\Chap2_Metabarcoding & Census\Census\1_Data_Collection\Dossier3\C023\Potamochoerus porcus\DSCF0016.JPG	DSCF0016.JPG	401833	769042	GardePro	10s	120	0.6	30	2024-07-01	13:50:17	2024-12-31	12:50:17	2024:07:04	2024-07-04	1:05:41	0.287	C023	Potamochoerus porcus	2.5	-45	DF	1610.83	2741.37	Koto	3302.8	2024-07-04 1:05:41	2024-07-01 13:50:17	2024-12-31 12:50:17	1	525	0.333	33.028
C:\Users\user-1\Desktop\My_PHD\5_Redaction_These\Chap2_Metabarcoding & Census\Census\1_Data_Collection\Dossier3\C023\Potamochoerus porcus\DSCF0017.JPG	DSCF0017.JPG	401833	769042	GardePro	10s	120	0.6	30	2024-07-01	13:50:17	2024-12-31	12:50:17	2024:07:04	2024-07-04	1:08:14	0.298	C023	Potamochoerus porcus	2.5	-45	DF	1610.83	2741.37	Koto	3302.8	2024-07-04 1:08:14	2024-07-01 13:50:17	2024-12-31 12:50:17	1	526	0.333	33.028
C:\Users\user-1\Desktop\My_PHD\5_Redaction_These\Chap2_Metabarcoding & Census\Census\1_Data_Collection\Dossier3\C023\Potamochoerus porcus\DSCF0018.JPG	DSCF0018.JPG	401833	769042	GardePro	10s	120	0.6	30	2024-07-01	13:50:17	2024-12-31	12:50:17	2024:07:04	2024-07-04	1:08:15	0.298	C023	Potamochoerus porcus	2.5	-45	DF	1610.83	2741.37	Koto	3302.8	2024-07-04 1:08:15	2024-07-01 13:50:17	2024-12-31 12:50:17	1	527	0.333	33.028
C:\Users\user-1\Desktop\My_PHD\5_Redaction_These\Chap2_Metabarcoding & Census\Census\1_Data_Collection\Dossier3\C023\Potamochoerus porcus\DSCF0019.JPG	DSCF0019.JPG	401833	769042	GardePro	10s	120	0.6	30	2024-07-01	13:50:17	2024-12-31	12:50:17	2024:07:04	2024-07-04	1:08:40	0.3	C023	Potamochoerus porcus	3	-40	DF	1610.83	2741.37	Koto	3302.8	2024-07-04 1:08:40	2024-07-01 13:50:17	2024-12-31 12:50:17	1	528	0.333	33.028
C:\Users\user-1\Desktop\My_PHD\5_Redaction_These\Chap2_Metabarcoding & Census\Census\1_Data_Collection\Dossier3\C023\Potamochoerus porcus\DSCF0020.JPG	DSCF0020.JPG	401833	769042	GardePro	10s	120	0.6	30	2024-07-01	13:50:17	2024-12-31	12:50:17	2024:07:04	2024-07-04	1:08:41	0.3	C023	Potamochoerus porcus	3	-40	DF	1610.83	2741.37	Koto	3302.8	2024-07-04 1:08:41	2024-07-01 13:50:17	2024-12-31 12:50:17	1	529	0.333	33.028
C:\Users\user-1\Desktop\My_PHD\5_Redaction_These\Chap2_Metabarcoding & Census\Census\1_Data_Collection\Dossier3\C023\Potamochoerus porcus\DSCF0021.JPG	DSCF0021.JPG	401833	769042	GardePro	10s	120	0.6	30	2024-07-01	13:50:17	2024-12-31	12:50:17	2024:07:04	2024-07-04	1:08:57	0.301	C023	Potamochoerus porcus	3.5	-40	DF	1610.83	2741.37	Koto	3302.8	2024-07-04 1:08:57	2024-07-01 13:50:17	2024-12-31 12:50:17	1	530	0.333	33.028
C:\Users\user-1\Desktop\My_PHD\5_Redaction_These\Chap2_Metabarcoding & Census\Census\1_Data_Collection\Dossier3\C023\Potamochoerus porcus\DSCF0022.JPG	DSCF0022.JPG	401833	769042	GardePro	10s	120	0.6	30	2024-07-01	13:50:17	2024-12-31	12:50:17	2024:07:04	2024-07-04	1:08:58	0.301	C023	Potamochoerus porcus	4	-40	DF	1610.83	2741.37	Koto	3302.8	2024-07-04 1:08:58	2024-07-01 13:50:17	2024-12-31 12:50:17	1	531	0.333	33.028
C:\Users\user-1\Desktop\My_PHD\5_Redaction_These\Chap2_Metabarcoding & Census\Census\1_Data_Collection\Dossier3\C026\Genetta genetta\DSCF0023.JPG	DSCF0023.JPG	404727	768963	GardePro	10s	120	0.6	30	2024-06-24	12:34:07	2024-12-31	11:34:07	2024:07:04	2024-07-04	22:13:02	5.816	C026	Genetta pardina/maculata	5	-20	DF	1463.17	3087.76	Koto	3302.8	2024-07-04 22:13:02	2024-06-24 12:34:07	2024-12-31 11:34:07	1	532	0.333	33.028
C:\Users\user-1\Desktop\My_PHD\5_Redaction_These\Chap2_Metabarcoding & Census\Census\1_Data_Collection\Dossier3\C026\Genetta genetta\DSCF0024.JPG	DSCF0024.JPG	404727	768963	GardePro	10s	120	0.6	30	2024-06-24	12:34:07	2024-12-31	11:34:07	2024:07:04	2024-07-04	22:13:03	5.817	C026	Genetta pardina/maculata	5	-20	DF	1463.17	3087.76	Koto	3302.8	2024-07-04 22:13:03	2024-06-24 12:34:07	2024-12-31 11:34:07	1	533	0.333	33.028
C:\Users\user-1\Desktop\My_PHD\5_Redaction_These\Chap2_Metabarcoding & Census\Census\1_Data_Collection\Dossier3\C026\Genetta genetta\DSCF0025.JPG	DSCF0025.JPG	404727	768963	GardePro	10s	120	0.6	30	2024-06-24	12:34:07	2024-12-31	11:34:07	2024:07:04	2024-07-04	22:13:27	5.818	C026	Genetta pardina/maculata	3	-10	DF	1463.17	3087.76	Koto	3302.8	2024-07-04 22:13:27	2024-06-24 12:34:07	2024-12-31 11:34:07	1	534	0.333	33.028
C:\Users\user-1\Desktop\My_PHD\5_Redaction_These\Chap2_Metabarcoding & Census\Census\1_Data_Collection\Dossier3\C026\Genetta genetta\DSCF0026.JPG	DSCF0026.JPG	404727	768963	GardePro	10s	120	0.6	30	2024-06-24	12:34:07	2024-12-31	11:34:07	2024:07:04	2024-07-04	22:13:27	5.818	C026	Genetta pardina/maculata	3	-10	DF	1463.17	3087.76	Koto	3302.8	2024-07-04 22:13:27	2024-06-24 12:34:07	2024-12-31 11:34:07	1	535	0.333	33.028
C:\Users\user-1\Desktop\My_PHD\5_Redaction_These\Chap2_Metabarcoding & Census\Census\1_Data_Collection\Dossier3\C026\Genetta genetta\DSCF0027.JPG	DSCF0027.JPG	404727	768963	GardePro	10s	120	0.6	30	2024-06-24	12:34:07	2024-12-31	11:34:07	2024:07:04	2024-07-04	22:13:35	5.819	C026	Genetta pardina/maculata	3	0	DF	1463.17	3087.76	Koto	3302.8	2024-07-04 22:13:35	2024-06-24 12:34:07	2024-12-31 11:34:07	1	536	0.333	33.028
C:\Users\user-1\Desktop\My_PHD\5_Redaction_These\Chap2_Metabarcoding & Census\Census\1_Data_Collection\Dossier3\C026\Genetta genetta\DSCF0028.JPG	DSCF0028.JPG	404727	768963	GardePro	10s	120	0.6	30	2024-06-24	12:34:07	2024-12-31	11:34:07	2024:07:04	2024-07-04	22:13:35	5.819	C026	Genetta pardina/maculata	3	5	DF	1463.17	3087.76	Koto	3302.8	2024-07-04 22:13:35	2024-06-24 12:34:07	2024-12-31 11:34:07	1	537	0.333	33.028
C:\Users\user-1\Desktop\My_PHD\5_Redaction_These\Chap2_Metabarcoding & Census\Census\1_Data_Collection\Dossier4\C027\Genetta genetta\DSCF0135.JPG	DSCF0135.JPG	405682	768980	GardePro	10s	120	0.6	30	2024-06-24	11:13:40	2024-12-31	10:13:40	2024:07:04	2024-07-04	20:02:39	5.248	C027	Genetta pardina/maculata	7.5	0	DF	1322.08	3769.26	Koto	3302.8	2024-07-04 20:02:39	2024-06-24 11:13:40	2024-12-31 10:13:40	1	538	0.333	33.028
C:\Users\user-1\Desktop\My_PHD\5_Redaction_These\Chap2_Metabarcoding & Census\Census\1_Data_Collection\Dossier4\C027\Genetta genetta\DSCF0136.JPG	DSCF0136.JPG	405682	768980	GardePro	10s	120	0.6	30	2024-06-24	11:13:40	2024-12-31	10:13:40	2024:07:04	2024-07-04	20:02:39	5.248	C027	Genetta pardina/maculata	7.5	0	DF	1322.08	3769.26	Koto	3302.8	2024-07-04 20:02:39	2024-06-24 11:13:40	2024-12-31 10:13:40	1	539	0.333	33.028
C:\Users\user-1\Desktop\My_PHD\5_Redaction_These\Chap2_Metabarcoding & Census\Census\1_Data_Collection\Dossier4\C027\Genetta genetta\DSCF0137.JPG	DSCF0137.JPG	405682	768980	GardePro	10s	120	0.6	30	2024-06-24	11:13:40	2024-12-31	10:13:40	2024:07:04	2024-07-04	20:02:52	5.248	C027	Genetta pardina/maculata	6	-25	DF	1322.08	3769.26	Koto	3302.8	2024-07-04 20:02:52	2024-06-24 11:13:40	2024-12-31 10:13:40	1	540	0.333	33.028
C:\Users\user-1\Desktop\My_PHD\5_Redaction_These\Chap2_Metabarcoding & Census\Census\1_Data_Collection\Dossier4\C027\Genetta genetta\DSCF0138.JPG	DSCF0138.JPG	405682	768980	GardePro	10s	120	0.6	30	2024-06-24	11:13:40	2024-12-31	10:13:40	2024:07:04	2024-07-04	20:02:52	5.248	C027	Genetta pardina/maculata	6	-25	DF	1322.08	3769.26	Koto	3302.8	2024-07-04 20:02:52	2024-06-24 11:13:40	2024-12-31 10:13:40	1	541	0.333	33.028
C:\Users\user-1\Desktop\My_PHD\5_Redaction_These\Chap2_Metabarcoding & Census\Census\1_Data_Collection\Dossier4\C027\Genetta genetta\DSCF0139.JPG	DSCF0139.JPG	405682	768980	GardePro	10s	120	0.6	30	2024-06-24	11:13:40	2024-12-31	10:13:40	2024:07:04	2024-07-04	20:02:56	5.249	C027	Genetta pardina/maculata	6	-35	DF	1322.08	3769.26	Koto	3302.8	2024-07-04 20:02:56	2024-06-24 11:13:40	2024-12-31 10:13:40	1	542	0.333	33.028
C:\Users\user-1\Desktop\My_PHD\5_Redaction_These\Chap2_Metabarcoding & Census\Census\1_Data_Collection\Dossier4\C027\Genetta genetta\DSCF0140.JPG	DSCF0140.JPG	405682	768980	GardePro	10s	120	0.6	30	2024-06-24	11:13:40	2024-12-31	10:13:40	2024:07:04	2024-07-04	20:02:56	5.249	C027	Genetta pardina/maculata	6	-35	DF	1322.08	3769.26	Koto	3302.8	2024-07-04 20:02:56	2024-06-24 11:13:40	2024-12-31 10:13:40	1	543	0.333	33.028
C:\Users\user-1\Desktop\My_PHD\5_Redaction_These\Chap2_Metabarcoding & Census\Census\1_Data_Collection\Dossier4\C027\Genetta genetta\DSCF0141.JPG	DSCF0141.JPG	405682	768980	GardePro	10s	120	0.6	30	2024-06-24	11:13:40	2024-12-31	10:13:40	2024:07:04	2024-07-04	20:03:13	5.25	C027	Genetta pardina/maculata	6	-40	DF	1322.08	3769.26	Koto	3302.8	2024-07-04 20:03:13	2024-06-24 11:13:40	2024-12-31 10:13:40	1	544	0.333	33.028
C:\Users\user-1\Desktop\My_PHD\5_Redaction_These\Chap2_Metabarcoding & Census\Census\1_Data_Collection\Dossier4\C027\Genetta genetta\DSCF0142.JPG	DSCF0142.JPG	405682	768980	GardePro	10s	120	0.6	30	2024-06-24	11:13:40	2024-12-31	10:13:40	2024:07:04	2024-07-04	20:03:13	5.25	C027	Genetta pardina/maculata	6	-40	DF	1322.08	3769.26	Koto	3302.8	2024-07-04 20:03:13	2024-06-24 11:13:40	2024-12-31 10:13:40	1	545	0.333	33.028
C:\Users\user-1\Desktop\My_PHD\5_Redaction_These\Chap2_Metabarcoding & Census\Census\1_Data_Collection\Dossier4\C027\Xerus erythropus\DSCF0133.JPG	DSCF0133.JPG	405682	768980	GardePro	10s	120	0.6	30	2024-06-24	11:13:40	2024-12-31	10:13:40	2024:07:04	2024-07-04	15:37:10	4.089	C027	Xerus erythropus	7.5	0	DF	1322.08	3769.26	Koto	3302.8	2024-07-04 15:37:10	2024-06-24 11:13:40	2024-12-31 10:13:40	1	546	0.333	33.028
C:\Users\user-1\Desktop\My_PHD\5_Redaction_These\Chap2_Metabarcoding & Census\Census\1_Data_Collection\Dossier4\C027\Xerus erythropus\DSCF0134.JPG	DSCF0134.JPG	405682	768980	GardePro	10s	120	0.6	30	2024-06-24	11:13:40	2024-12-31	10:13:40	2024:07:04	2024-07-04	15:37:10	4.089	C027	Xerus erythropus	7.5	0	DF	1322.08	3769.26	Koto	3302.8	2024-07-04 15:37:10	2024-06-24 11:13:40	2024-12-31 10:13:40	1	547	0.333	33.028
C:\Users\user-1\Desktop\My_PHD\5_Redaction_These\Chap2_Metabarcoding & Census\Census\1_Data_Collection\Dossier4\C032\Cercopithecus mona\DSCF0005.JPG	DSCF0005.JPG	402666	769980	GardePro	10s	120	0.6	30	2024-07-01	10:18:13	2024-12-31	9:18:13	2024:07:04	2024-07-04	12:22:30	3.24	C032	Cercopithecus mona	4	40	CF	486.646	1491.22	Koto	1050.91	2024-07-04 12:22:30	2024-07-01 10:18:13	2024-12-31 9:18:13	1	548	0.333	10.5091
C:\Users\user-1\Desktop\My_PHD\5_Redaction_These\Chap2_Metabarcoding & Census\Census\1_Data_Collection\Dossier4\C032\Cercopithecus mona\DSCF0006.JPG	DSCF0006.JPG	402666	769980	GardePro	10s	120	0.6	30	2024-07-01	10:18:13	2024-12-31	9:18:13	2024:07:04	2024-07-04	12:22:31	3.24	C032	Cercopithecus mona	4	40	CF	486.646	1491.22	Koto	1050.91	2024-07-04 12:22:31	2024-07-01 10:18:13	2024-12-31 9:18:13	1	549	0.333	10.5091
C:\Users\user-1\Desktop\My_PHD\5_Redaction_These\Chap2_Metabarcoding & Census\Census\1_Data_Collection\Dossier5\C035\Crossarchus obscurus\07040019.JPG	07040019.JPG	405710	769960	BUSHNEL	10s	35	0.6	33.5	2024-06-27	10:59:48	2024-12-31	9:59:48	2024:07:04	2024-07-04	9:10:23	2.402	C035	Crossarchus platycephalus	3	-12	DF	604.665	3200.45	Koto	3302.8	2024-07-04 9:10:23	2024-06-27 10:59:48	2024-12-31 9:59:48	1	550	0.097	33.028
C:\Users\user-1\Desktop\My_PHD\5_Redaction_These\Chap2_Metabarcoding & Census\Census\1_Data_Collection\Dossier5\C035\Crossarchus obscurus\07040019.JPG	07040019.JPG	405710	769960	BUSHNEL	10s	35	0.6	33.5	2024-06-27	10:59:48	2024-12-31	9:59:48	2024:07:04	2024-07-04	9:10:23	2.402	C035	Crossarchus platycephalus	3	-12	DF	604.665	3200.45	Koto	3302.8	2024-07-04 9:10:23	2024-06-27 10:59:48	2024-12-31 9:59:48	1	551	0.097	33.028
C:\Users\user-1\Desktop\My_PHD\5_Redaction_These\Chap2_Metabarcoding & Census\Census\1_Data_Collection\Dossier5\C035\Crossarchus obscurus\07040020.JPG	07040020.JPG	405710	769960	BUSHNEL	10s	35	0.6	33.5	2024-06-27	10:59:48	2024-12-31	9:59:48	2024:07:04	2024-07-04	9:10:24	2.402	C035	Crossarchus platycephalus	3	-12	DF	604.665	3200.45	Koto	3302.8	2024-07-04 9:10:24	2024-06-27 10:59:48	2024-12-31 9:59:48	1	552	0.097	33.028
C:\Users\user-1\Desktop\My_PHD\5_Redaction_These\Chap2_Metabarcoding & Census\Census\1_Data_Collection\Dossier5\C035\Crossarchus obscurus\07040020.JPG	07040020.JPG	405710	769960	BUSHNEL	10s	35	0.6	33.5	2024-06-27	10:59:48	2024-12-31	9:59:48	2024:07:04	2024-07-04	9:10:24	2.402	C035	Crossarchus platycephalus	3	-12	DF	604.665	3200.45	Koto	3302.8	2024-07-04 9:10:24	2024-06-27 10:59:48	2024-12-31 9:59:48	1	553	0.097	33.028
C:\Users\user-1\Desktop\My_PHD\5_Redaction_These\Chap2_Metabarcoding & Census\Census\1_Data_Collection\Dossier2\C019\Ratus sp\07040037.JPG	07040037.JPG	404700	767950	BUSHNEL	10s	35	0.6	33.5	2024-06-26	12:02:59	2024-12-31	11:02:59	2024:07:04	2024-07-04	04:17:20	1.12283	C019	Praomys sp.	2	-17.5	DF	1711.1	3936.84	Koto	3302.8	2024-07-04 04:17:20	2024-06-26 12:02:59	2024-12-31 11:02:59	1	554	0.097	33.028
C:\Users\user-1\Desktop\My_PHD\5_Redaction_These\Chap2_Metabarcoding & Census\Census\1_Data_Collection\Dossier3\C023\Cercopithecus mona\DSCF0023.JPG	DSCF0023.JPG	401833	769042	GardePro	10s	120	0.6	30	2024-07-01	13:50:17	2024-12-31	12:50:17	2024:07:05	2024-07-05	17:42:20	4.635	C023	Cercopithecus mona	4	-45	DF	1610.83	2741.37	Koto	3302.8	2024-07-05 17:42:20	2024-07-01 13:50:17	2024-12-31 12:50:17	1	555	0.333	33.028
C:\Users\user-1\Desktop\My_PHD\5_Redaction_These\Chap2_Metabarcoding & Census\Census\1_Data_Collection\Dossier3\C023\Cercopithecus mona\DSCF0024.JPG	DSCF0024.JPG	401833	769042	GardePro	10s	120	0.6	30	2024-07-01	13:50:17	2024-12-31	12:50:17	2024:07:05	2024-07-05	17:42:21	4.635	C023	Cercopithecus mona	7	-25	DF	1610.83	2741.37	Koto	3302.8	2024-07-05 17:42:21	2024-07-01 13:50:17	2024-12-31 12:50:17	1	556	0.333	33.028
C:\Users\user-1\Desktop\My_PHD\5_Redaction_These\Chap2_Metabarcoding & Census\Census\1_Data_Collection\Dossier3\C023\Cercopithecus mona\DSCF0025.JPG	DSCF0025.JPG	401833	769042	GardePro	10s	120	0.6	30	2024-07-01	13:50:17	2024-12-31	12:50:17	2024:07:05	2024-07-05	17:42:35	4.636	C023	Cercopithecus mona	4	-45	DF	1610.83	2741.37	Koto	3302.8	2024-07-05 17:42:35	2024-07-01 13:50:17	2024-12-31 12:50:17	1	557	0.333	33.028
C:\Users\user-1\Desktop\My_PHD\5_Redaction_These\Chap2_Metabarcoding & Census\Census\1_Data_Collection\Dossier3\C023\Cercopithecus mona\DSCF0026.JPG	DSCF0026.JPG	401833	769042	GardePro	10s	120	0.6	30	2024-07-01	13:50:17	2024-12-31	12:50:17	2024:07:05	2024-07-05	17:42:36	4.636	C023	Cercopithecus mona	4	-60	DF	1610.83	2741.37	Koto	3302.8	2024-07-05 17:42:36	2024-07-01 13:50:17	2024-12-31 12:50:17	1	558	0.333	33.028
C:\Users\user-1\Desktop\My_PHD\5_Redaction_These\Chap2_Metabarcoding & Census\Census\1_Data_Collection\Dossier3\C023\Cercopithecus mona\DSCF0027.JPG	DSCF0027.JPG	401833	769042	GardePro	10s	120	0.6	30	2024-07-01	13:50:17	2024-12-31	12:50:17	2024:07:05	2024-07-05	17:57:04	4.7	C023	Cercopithecus mona	4	-45	DF	1610.83	2741.37	Koto	3302.8	2024-07-05 17:57:04	2024-07-01 13:50:17	2024-12-31 12:50:17	1	559	0.333	33.028
C:\Users\user-1\Desktop\My_PHD\5_Redaction_These\Chap2_Metabarcoding & Census\Census\1_Data_Collection\Dossier3\C023\Cercopithecus mona\DSCF0028.JPG	DSCF0028.JPG	401833	769042	GardePro	10s	120	0.6	30	2024-07-01	13:50:17	2024-12-31	12:50:17	2024:07:05	2024-07-05	17:57:05	4.7	C023	Cercopithecus mona	4	-45	DF	1610.83	2741.37	Koto	3302.8	2024-07-05 17:57:05	2024-07-01 13:50:17	2024-12-31 12:50:17	1	560	0.333	33.028
C:\Users\user-1\Desktop\My_PHD\5_Redaction_These\Chap2_Metabarcoding & Census\Census\1_Data_Collection\Dossier3\C025\Genetta genetta\DSCF0023.JPG	DSCF0023.JPG	403704	768964	GardePro	10s	120	0.6	30	2024-06-24	14:20:16	2024-12-31	13:20:16	2024:07:05	2024-07-05	19:36:55	5.135	C025	Genetta pardina/maculata	4	-25	DF	1389.14	2619.4	Koto	3302.8	2024-07-05 19:36:55	2024-06-24 14:20:16	2024-12-31 13:20:16	1	561	0.333	33.028
C:\Users\user-1\Desktop\My_PHD\5_Redaction_These\Chap2_Metabarcoding & Census\Census\1_Data_Collection\Dossier3\C025\Genetta genetta\DSCF0024.JPG	DSCF0024.JPG	403704	768964	GardePro	10s	120	0.6	30	2024-06-24	14:20:16	2024-12-31	13:20:16	2024:07:05	2024-07-05	19:36:55	5.135	C025	Genetta pardina/maculata	3	0	DF	1389.14	2619.4	Koto	3302.8	2024-07-05 19:36:55	2024-06-24 14:20:16	2024-12-31 13:20:16	1	562	0.333	33.028
C:\Users\user-1\Desktop\My_PHD\5_Redaction_These\Chap2_Metabarcoding & Census\Census\1_Data_Collection\Dossier3\C025\Genetta genetta\DSCF0025.JPG	DSCF0025.JPG	403704	768964	GardePro	10s	120	0.6	30	2024-06-24	14:20:16	2024-12-31	13:20:16	2024:07:05	2024-07-05	19:36:57	5.135	C025	Genetta pardina/maculata	3	20	DF	1389.14	2619.4	Koto	3302.8	2024-07-05 19:36:57	2024-06-24 14:20:16	2024-12-31 13:20:16	1	563	0.333	33.028
C:\Users\user-1\Desktop\My_PHD\5_Redaction_These\Chap2_Metabarcoding & Census\Census\1_Data_Collection\Dossier3\C025\Genetta genetta\DSCF0025.JPG	DSCF0025.JPG	403704	768964	GardePro	10s	120	0.6	30	2024-06-24	14:20:16	2024-12-31	13:20:16	2024:07:05	2024-07-05	19:36:57	5.135	C025	Genetta pardina/maculata	3	20	DF	1389.14	2619.4	Koto	3302.8	2024-07-05 19:36:57	2024-06-24 14:20:16	2024-12-31 13:20:16	1	564	0.333	33.028
C:\Users\user-1\Desktop\My_PHD\5_Redaction_These\Chap2_Metabarcoding & Census\Census\1_Data_Collection\Dossier3\C025\Genetta genetta\DSCF0026.JPG	DSCF0026.JPG	403704	768964	GardePro	10s	120	0.6	30	2024-06-24	14:20:16	2024-12-31	13:20:16	2024:07:05	2024-07-05	19:36:57	5.135	C025	Genetta pardina/maculata	3	40	DF	1389.14	2619.4	Koto	3302.8	2024-07-05 19:36:57	2024-06-24 14:20:16	2024-12-31 13:20:16	1	565	0.333	33.028
C:\Users\user-1\Desktop\My_PHD\5_Redaction_These\Chap2_Metabarcoding & Census\Census\1_Data_Collection\Dossier3\C025\Genetta genetta\DSCF0026.JPG	DSCF0026.JPG	403704	768964	GardePro	10s	120	0.6	30	2024-06-24	14:20:16	2024-12-31	13:20:16	2024:07:05	2024-07-05	19:36:57	5.135	C025	Genetta pardina/maculata	3	40	DF	1389.14	2619.4	Koto	3302.8	2024-07-05 19:36:57	2024-06-24 14:20:16	2024-12-31 13:20:16	1	566	0.333	33.028
C:\Users\user-1\Desktop\My_PHD\5_Redaction_These\Chap2_Metabarcoding & Census\Census\1_Data_Collection\Dossier4\C027\Genetta genetta\DSCF0143.JPG	DSCF0143.JPG	405682	768980	GardePro	10s	120	0.6	30	2024-06-24	11:13:40	2024-12-31	10:13:40	2024:07:05	2024-07-05	3:31:49	0.924	C027	Genetta pardina/maculata	5	30	DF	1322.08	3769.26	Koto	3302.8	2024-07-05 3:31:49	2024-06-24 11:13:40	2024-12-31 10:13:40	1	567	0.333	33.028
C:\Users\user-1\Desktop\My_PHD\5_Redaction_These\Chap2_Metabarcoding & Census\Census\1_Data_Collection\Dossier4\C027\Genetta genetta\DSCF0144.JPG	DSCF0144.JPG	405682	768980	GardePro	10s	120	0.6	30	2024-06-24	11:13:40	2024-12-31	10:13:40	2024:07:05	2024-07-05	3:31:49	0.924	C027	Genetta pardina/maculata	4.8	30	DF	1322.08	3769.26	Koto	3302.8	2024-07-05 3:31:49	2024-06-24 11:13:40	2024-12-31 10:13:40	1	568	0.333	33.028
C:\Users\user-1\Desktop\My_PHD\5_Redaction_These\Chap2_Metabarcoding & Census\Census\1_Data_Collection\Dossier4\C027\Genetta genetta\DSCF0145.JPG	DSCF0145.JPG	405682	768980	GardePro	10s	120	0.6	30	2024-06-24	11:13:40	2024-12-31	10:13:40	2024:07:05	2024-07-05	3:31:54	0.925	C027	Genetta pardina/maculata	4	-45	DF	1322.08	3769.26	Koto	3302.8	2024-07-05 3:31:54	2024-06-24 11:13:40	2024-12-31 10:13:40	1	569	0.333	33.028
C:\Users\user-1\Desktop\My_PHD\5_Redaction_These\Chap2_Metabarcoding & Census\Census\1_Data_Collection\Dossier4\C027\Genetta genetta\DSCF0146.JPG	DSCF0146.JPG	405682	768980	GardePro	10s	120	0.6	30	2024-06-24	11:13:40	2024-12-31	10:13:40	2024:07:05	2024-07-05	3:31:54	0.925	C027	Genetta pardina/maculata	4	-45	DF	1322.08	3769.26	Koto	3302.8	2024-07-05 3:31:54	2024-06-24 11:13:40	2024-12-31 10:13:40	1	570	0.333	33.028
C:\Users\user-1\Desktop\My_PHD\5_Redaction_These\Chap2_Metabarcoding & Census\Census\1_Data_Collection\Dossier5\C033\Xerus erythropus\DSCF0079.JPG	DSCF0079.JPG	403721	769978	GardePro	10s	120	0.6	30	2024-06-27	13:20:57	2024-12-31	12:20:57	2024:07:05	2024-07-05	7:40:36	2.01	C033	Xerus erythropus	4.5	25	DF	394.703	1701.99	Koto	3302.8	2024-07-05 7:40:36	2024-06-27 13:20:57	2024-12-31 12:20:57	1	571	0.333	33.028
C:\Users\user-1\Desktop\My_PHD\5_Redaction_These\Chap2_Metabarcoding & Census\Census\1_Data_Collection\Dossier5\C033\Xerus erythropus\DSCF0080.JPG	DSCF0080.JPG	403721	769978	GardePro	10s	120	0.6	30	2024-06-27	13:20:57	2024-12-31	12:20:57	2024:07:05	2024-07-05	7:40:36	2.01	C033	Xerus erythropus	6	35	DF	394.703	1701.99	Koto	3302.8	2024-07-05 7:40:36	2024-06-27 13:20:57	2024-12-31 12:20:57	1	572	0.333	33.028
C:\Users\user-1\Desktop\My_PHD\5_Redaction_These\Chap2_Metabarcoding & Census\Census\1_Data_Collection\Dossier5\C033\Xerus erythropus\DSCF0081.JPG	DSCF0081.JPG	403721	769978	GardePro	10s	120	0.6	30	2024-06-27	13:20:57	2024-12-31	12:20:57	2024:07:05	2024-07-05	7:47:28	2.04	C033	Xerus erythropus	3	-15	DF	394.703	1701.99	Koto	3302.8	2024-07-05 7:47:28	2024-06-27 13:20:57	2024-12-31 12:20:57	1	573	0.333	33.028
C:\Users\user-1\Desktop\My_PHD\5_Redaction_These\Chap2_Metabarcoding & Census\Census\1_Data_Collection\Dossier5\C033\Xerus erythropus\DSCF0082.JPG	DSCF0082.JPG	403721	769978	GardePro	10s	120	0.6	30	2024-06-27	13:20:57	2024-12-31	12:20:57	2024:07:05	2024-07-05	7:47:28	2.04	C033	Xerus erythropus	2	-35	DF	394.703	1701.99	Koto	3302.8	2024-07-05 7:47:28	2024-06-27 13:20:57	2024-12-31 12:20:57	1	574	0.333	33.028
C:\Users\user-1\Desktop\My_PHD\5_Redaction_These\Chap2_Metabarcoding & Census\Census\1_Data_Collection\Dossier1\C009\Chlorocebus tantalus\DSCF0005.JPG	DSCF0005.JPG	402686	767070	GardePro	10s	120	0.6	30	2024-07-06	12:07:00	2024-12-31	11:07:00	2024:07:06	2024-07-06	12:09:10	3.182	C009	Chlorocebus tantalus	7	20	CF	1513.48	4485.21	Koto	1050.91	2024-07-06 12:09:10	2024-07-06 12:07:00	2024-12-31 11:07:00	1	575	0.333	10.5091
C:\Users\user-1\Desktop\My_PHD\5_Redaction_These\Chap2_Metabarcoding & Census\Census\1_Data_Collection\Dossier1\C009\Chlorocebus tantalus\DSCF0006.JPG	DSCF0006.JPG	402686	767070	GardePro	10s	120	0.6	30	2024-07-06	12:07:00	2024-12-31	11:07:00	2024:07:06	2024-07-06	12:09:10	3.182	C009	Chlorocebus tantalus	7	20	CF	1513.48	4485.21	Koto	1050.91	2024-07-06 12:09:10	2024-07-06 12:07:00	2024-12-31 11:07:00	1	576	0.333	10.5091
C:\Users\user-1\Desktop\My_PHD\5_Redaction_These\Chap2_Metabarcoding & Census\Census\1_Data_Collection\Dossier1\C010\Philantomba walteri\DSCF0005.JPG	DSCF0005.JPG	403182	767030	GardePro	10s	120	0.6	30	2024-07-06	13:45:47	2024-12-31	12:45:47	2024:07:06	2024-07-06	19:47:58	5.183	C010	Philantomba walteri	5	30	CF	1423.16	4559.62	Koto	1050.91	2024-07-06 19:47:58	2024-07-06 13:45:47	2024-12-31 12:45:47	1	577	0.333	10.5091
C:\Users\user-1\Desktop\My_PHD\5_Redaction_These\Chap2_Metabarcoding & Census\Census\1_Data_Collection\Dossier1\C010\Philantomba walteri\DSCF0006.JPG	DSCF0006.JPG	403182	767030	GardePro	10s	120	0.6	30	2024-07-06	13:45:47	2024-12-31	12:45:47	2024:07:06	2024-07-06	19:47:59	5.184	C010	Philantomba walteri	5	30	CF	1423.16	4559.62	Koto	1050.91	2024-07-06 19:47:59	2024-07-06 13:45:47	2024-12-31 12:45:47	1	578	0.333	10.5091
C:\Users\user-1\Desktop\My_PHD\5_Redaction_These\Chap2_Metabarcoding & Census\Census\1_Data_Collection\Dossier1\C010\Philantomba walteri\DSCF0007.JPG	DSCF0007.JPG	403182	767030	GardePro	10s	120	0.6	30	2024-07-06	13:45:47	2024-12-31	12:45:47	2024:07:06	2024-07-06	19:48:04	5.184	C010	Philantomba walteri	6	15	CF	1423.16	4559.62	Koto	1050.91	2024-07-06 19:48:04	2024-07-06 13:45:47	2024-12-31 12:45:47	1	579	0.333	10.5091
C:\Users\user-1\Desktop\My_PHD\5_Redaction_These\Chap2_Metabarcoding & Census\Census\1_Data_Collection\Dossier1\C010\Philantomba walteri\DSCF0008.JPG	DSCF0008.JPG	403182	767030	GardePro	10s	120	0.6	30	2024-07-06	13:45:47	2024-12-31	12:45:47	2024:07:06	2024-07-06	19:48:05	5.184	C010	Philantomba walteri	6	15	CF	1423.16	4559.62	Koto	1050.91	2024-07-06 19:48:05	2024-07-06 13:45:47	2024-12-31 12:45:47	1	580	0.333	10.5091
C:\Users\user-1\Desktop\My_PHD\5_Redaction_These\Chap2_Metabarcoding & Census\Census\1_Data_Collection\Dossier1\C010\Philantomba walteri\DSCF0009.JPG	DSCF0009.JPG	403182	767030	GardePro	10s	120	0.6	30	2024-07-06	13:45:47	2024-12-31	12:45:47	2024:07:06	2024-07-06	19:48:08	5.184	C010	Philantomba walteri	6.5	25	CF	1423.16	4559.62	Koto	1050.91	2024-07-06 19:48:08	2024-07-06 13:45:47	2024-12-31 12:45:47	1	581	0.333	10.5091
C:\Users\user-1\Desktop\My_PHD\5_Redaction_These\Chap2_Metabarcoding & Census\Census\1_Data_Collection\Dossier1\C010\Philantomba walteri\DSCF0010.JPG	DSCF0010.JPG	403182	767030	GardePro	10s	120	0.6	30	2024-07-06	13:45:47	2024-12-31	12:45:47	2024:07:06	2024-07-06	19:48:09	5.184	C010	Philantomba walteri	7	30	CF	1423.16	4559.62	Koto	1050.91	2024-07-06 19:48:09	2024-07-06 13:45:47	2024-12-31 12:45:47	1	582	0.333	10.5091
C:\Users\user-1\Desktop\My_PHD\5_Redaction_These\Chap2_Metabarcoding & Census\Census\1_Data_Collection\Dossier3\C023\Crossarchus obscurus\DSCF0037.JPG	DSCF0037.JPG	401833	769042	GardePro	10s	120	0.6	30	2024-07-01	13:50:17	2024-12-31	12:50:17	2024:07:06	2024-07-06	9:50:24	2.576	C023	Crossarchus platycephalus	5	-10	DF	1610.83	2741.37	Koto	3302.8	2024-07-06 9:50:24	2024-07-01 13:50:17	2024-12-31 12:50:17	1	583	0.333	33.028
C:\Users\user-1\Desktop\My_PHD\5_Redaction_These\Chap2_Metabarcoding & Census\Census\1_Data_Collection\Dossier3\C023\Crossarchus obscurus\DSCF0037.JPG	DSCF0037.JPG	401833	769042	GardePro	10s	120	0.6	30	2024-07-01	13:50:17	2024-12-31	12:50:17	2024:07:06	2024-07-06	9:50:24	2.576	C023	Crossarchus platycephalus	5	-10	DF	1610.83	2741.37	Koto	3302.8	2024-07-06 9:50:24	2024-07-01 13:50:17	2024-12-31 12:50:17	1	584	0.333	33.028
C:\Users\user-1\Desktop\My_PHD\5_Redaction_These\Chap2_Metabarcoding & Census\Census\1_Data_Collection\Dossier3\C023\Crossarchus obscurus\DSCF0038.JPG	DSCF0038.JPG	401833	769042	GardePro	10s	120	0.6	30	2024-07-01	13:50:17	2024-12-31	12:50:17	2024:07:06	2024-07-06	9:50:24	2.576	C023	Crossarchus platycephalus	5	-10	DF	1610.83	2741.37	Koto	3302.8	2024-07-06 9:50:24	2024-07-01 13:50:17	2024-12-31 12:50:17	1	585	0.333	33.028
C:\Users\user-1\Desktop\My_PHD\5_Redaction_These\Chap2_Metabarcoding & Census\Census\1_Data_Collection\Dossier3\C023\Crossarchus obscurus\DSCF0038.JPG	DSCF0038.JPG	401833	769042	GardePro	10s	120	0.6	30	2024-07-01	13:50:17	2024-12-31	12:50:17	2024:07:06	2024-07-06	9:50:24	2.576	C023	Crossarchus platycephalus	5	-10	DF	1610.83	2741.37	Koto	3302.8	2024-07-06 9:50:24	2024-07-01 13:50:17	2024-12-31 12:50:17	1	586	0.333	33.028
C:\Users\user-1\Desktop\My_PHD\5_Redaction_These\Chap2_Metabarcoding & Census\Census\1_Data_Collection\Dossier3\C023\Crossarchus obscurus\DSCF0039.JPG	DSCF0039.JPG	401833	769042	GardePro	10s	120	0.6	30	2024-07-01	13:50:17	2024-12-31	12:50:17	2024:07:06	2024-07-06	9:53:33	2.59	C023	Crossarchus platycephalus	5	-5	DF	1610.83	2741.37	Koto	3302.8	2024-07-06 9:53:33	2024-07-01 13:50:17	2024-12-31 12:50:17	1	587	0.333	33.028
C:\Users\user-1\Desktop\My_PHD\5_Redaction_These\Chap2_Metabarcoding & Census\Census\1_Data_Collection\Dossier3\C023\Crossarchus obscurus\DSCF0039.JPG	DSCF0039.JPG	401833	769042	GardePro	10s	120	0.6	30	2024-07-01	13:50:17	2024-12-31	12:50:17	2024:07:06	2024-07-06	9:53:33	2.59	C023	Crossarchus platycephalus	5	-5	DF	1610.83	2741.37	Koto	3302.8	2024-07-06 9:53:33	2024-07-01 13:50:17	2024-12-31 12:50:17	1	588	0.333	33.028
C:\Users\user-1\Desktop\My_PHD\5_Redaction_These\Chap2_Metabarcoding & Census\Census\1_Data_Collection\Dossier3\C023\Crossarchus obscurus\DSCF0039.JPG	DSCF0039.JPG	401833	769042	GardePro	10s	120	0.6	30	2024-07-01	13:50:17	2024-12-31	12:50:17	2024:07:06	2024-07-06	9:53:33	2.59	C023	Crossarchus platycephalus	5	-5	DF	1610.83	2741.37	Koto	3302.8	2024-07-06 9:53:33	2024-07-01 13:50:17	2024-12-31 12:50:17	1	589	0.333	33.028
C:\Users\user-1\Desktop\My_PHD\5_Redaction_These\Chap2_Metabarcoding & Census\Census\1_Data_Collection\Dossier3\C023\Crossarchus obscurus\DSCF0040.JPG	DSCF0040.JPG	401833	769042	GardePro	10s	120	0.6	30	2024-07-01	13:50:17	2024-12-31	12:50:17	2024:07:06	2024-07-06	9:53:33	2.59	C023	Crossarchus platycephalus	5	-5	DF	1610.83	2741.37	Koto	3302.8	2024-07-06 9:53:33	2024-07-01 13:50:17	2024-12-31 12:50:17	1	590	0.333	33.028
C:\Users\user-1\Desktop\My_PHD\5_Redaction_These\Chap2_Metabarcoding & Census\Census\1_Data_Collection\Dossier3\C023\Crossarchus obscurus\DSCF0040.JPG	DSCF0040.JPG	401833	769042	GardePro	10s	120	0.6	30	2024-07-01	13:50:17	2024-12-31	12:50:17	2024:07:06	2024-07-06	9:53:33	2.59	C023	Crossarchus platycephalus	5	-5	DF	1610.83	2741.37	Koto	3302.8	2024-07-06 9:53:33	2024-07-01 13:50:17	2024-12-31 12:50:17	1	591	0.333	33.028
C:\Users\user-1\Desktop\My_PHD\5_Redaction_These\Chap2_Metabarcoding & Census\Census\1_Data_Collection\Dossier3\C023\Crossarchus obscurus\DSCF0040.JPG	DSCF0040.JPG	401833	769042	GardePro	10s	120	0.6	30	2024-07-01	13:50:17	2024-12-31	12:50:17	2024:07:06	2024-07-06	9:53:33	2.59	C023	Crossarchus platycephalus	5	-5	DF	1610.83	2741.37	Koto	3302.8	2024-07-06 9:53:33	2024-07-01 13:50:17	2024-12-31 12:50:17	1	592	0.333	33.028
C:\Users\user-1\Desktop\My_PHD\5_Redaction_These\Chap2_Metabarcoding & Census\Census\1_Data_Collection\Dossier3\C023\Potamochoerus porcus\DSCF0029.JPG	DSCF0029.JPG	401833	769042	GardePro	10s	120	0.6	30	2024-07-01	13:50:17	2024-12-31	12:50:17	2024:07:06	2024-07-06	4:19:02	1.13	C023	Potamochoerus porcus	2.5	-40	DF	1610.83	2741.37	Koto	3302.8	2024-07-06 4:19:02	2024-07-01 13:50:17	2024-12-31 12:50:17	1	593	0.333	33.028
C:\Users\user-1\Desktop\My_PHD\5_Redaction_These\Chap2_Metabarcoding & Census\Census\1_Data_Collection\Dossier3\C023\Potamochoerus porcus\DSCF0030.JPG	DSCF0030.JPG	401833	769042	GardePro	10s	120	0.6	30	2024-07-01	13:50:17	2024-12-31	12:50:17	2024:07:06	2024-07-06	4:19:03	1.13	C023	Potamochoerus porcus	2.5	-35	DF	1610.83	2741.37	Koto	3302.8	2024-07-06 4:19:03	2024-07-01 13:50:17	2024-12-31 12:50:17	1	594	0.333	33.028
C:\Users\user-1\Desktop\My_PHD\5_Redaction_These\Chap2_Metabarcoding & Census\Census\1_Data_Collection\Dossier4\C028\Potamochoerus porcus\DSCF0047.JPG	DSCF0047.JPG	406711	768995	GardePro	10s	120	0.6	30	2024-06-24	10:00:08	2024-12-31	9:00:08	2024:07:06	2024-07-06	15:43:24	4.116	C028	Potamochoerus porcus	1.5	-50	DF	452.688	2838.4	Zalime	3302.8	2024-07-06 15:43:24	2024-06-24 10:00:08	2024-12-31 9:00:08	1	595	0.333	33.028
C:\Users\user-1\Desktop\My_PHD\5_Redaction_These\Chap2_Metabarcoding & Census\Census\1_Data_Collection\Dossier4\C028\Potamochoerus porcus\DSCF0048.JPG	DSCF0048.JPG	406711	768995	GardePro	10s	120	0.6	30	2024-06-24	10:00:08	2024-12-31	9:00:08	2024:07:06	2024-07-06	15:43:24	4.116	C028	Potamochoerus porcus	1	-45	DF	452.688	2838.4	Zalime	3302.8	2024-07-06 15:43:24	2024-06-24 10:00:08	2024-12-31 9:00:08	1	596	0.333	33.028
C:\Users\user-1\Desktop\My_PHD\5_Redaction_These\Chap2_Metabarcoding & Census\Census\1_Data_Collection\Dossier4\C028\Potamochoerus porcus\DSCF0048.JPG	DSCF0048.JPG	406711	768995	GardePro	10s	120	0.6	30	2024-06-24	10:00:08	2024-12-31	9:00:08	2024:07:06	2024-07-06	15:43:24	4.116	C028	Potamochoerus porcus	1	-45	DF	452.688	2838.4	Zalime	3302.8	2024-07-06 15:43:24	2024-06-24 10:00:08	2024-12-31 9:00:08	1	597	0.333	33.028
C:\Users\user-1\Desktop\My_PHD\5_Redaction_These\Chap2_Metabarcoding & Census\Census\1_Data_Collection\Dossier4\C028\Potamochoerus porcus\DSCF0049.JPG	DSCF0049.JPG	406711	768995	GardePro	10s	120	0.6	30	2024-06-24	10:00:08	2024-12-31	9:00:08	2024:07:06	2024-07-06	15:43:30	4.117	C028	Potamochoerus porcus	1	0	DF	452.688	2838.4	Zalime	3302.8	2024-07-06 15:43:30	2024-06-24 10:00:08	2024-12-31 9:00:08	1	598	0.333	33.028
C:\Users\user-1\Desktop\My_PHD\5_Redaction_These\Chap2_Metabarcoding & Census\Census\1_Data_Collection\Dossier4\C028\Potamochoerus porcus\DSCF0049.JPG	DSCF0049.JPG	406711	768995	GardePro	10s	120	0.6	30	2024-06-24	10:00:08	2024-12-31	9:00:08	2024:07:06	2024-07-06	15:43:30	4.117	C028	Potamochoerus porcus	1	0	DF	452.688	2838.4	Zalime	3302.8	2024-07-06 15:43:30	2024-06-24 10:00:08	2024-12-31 9:00:08	1	599	0.333	33.028
C:\Users\user-1\Desktop\My_PHD\5_Redaction_These\Chap2_Metabarcoding & Census\Census\1_Data_Collection\Dossier4\C028\Potamochoerus porcus\DSCF0049.JPG	DSCF0049.JPG	406711	768995	GardePro	10s	120	0.6	30	2024-06-24	10:00:08	2024-12-31	9:00:08	2024:07:06	2024-07-06	15:43:30	4.117	C028	Potamochoerus porcus	1	0	DF	452.688	2838.4	Zalime	3302.8	2024-07-06 15:43:30	2024-06-24 10:00:08	2024-12-31 9:00:08	1	600	0.333	33.028
C:\Users\user-1\Desktop\My_PHD\5_Redaction_These\Chap2_Metabarcoding & Census\Census\1_Data_Collection\Dossier4\C028\Potamochoerus porcus\DSCF0050.JPG	DSCF0050.JPG	406711	768995	GardePro	10s	120	0.6	30	2024-06-24	10:00:08	2024-12-31	9:00:08	2024:07:06	2024-07-06	15:43:30	4.117	C028	Potamochoerus porcus	1	0	DF	452.688	2838.4	Zalime	3302.8	2024-07-06 15:43:30	2024-06-24 10:00:08	2024-12-31 9:00:08	1	601	0.333	33.028
C:\Users\user-1\Desktop\My_PHD\5_Redaction_These\Chap2_Metabarcoding & Census\Census\1_Data_Collection\Dossier4\C028\Potamochoerus porcus\DSCF0050.JPG	DSCF0050.JPG	406711	768995	GardePro	10s	120	0.6	30	2024-06-24	10:00:08	2024-12-31	9:00:08	2024:07:06	2024-07-06	15:43:30	4.117	C028	Potamochoerus porcus	1	0	DF	452.688	2838.4	Zalime	3302.8	2024-07-06 15:43:30	2024-06-24 10:00:08	2024-12-31 9:00:08	1	602	0.333	33.028
C:\Users\user-1\Desktop\My_PHD\5_Redaction_These\Chap2_Metabarcoding & Census\Census\1_Data_Collection\Dossier4\C028\Potamochoerus porcus\DSCF0050.JPG	DSCF0050.JPG	406711	768995	GardePro	10s	120	0.6	30	2024-06-24	10:00:08	2024-12-31	9:00:08	2024:07:06	2024-07-06	15:43:30	4.117	C028	Potamochoerus porcus	1	0	DF	452.688	2838.4	Zalime	3302.8	2024-07-06 15:43:30	2024-06-24 10:00:08	2024-12-31 9:00:08	1	603	0.333	33.028
C:\Users\user-1\Desktop\My_PHD\5_Redaction_These\Chap2_Metabarcoding & Census\Census\1_Data_Collection\Dossier4\C028\Potamochoerus porcus\DSCF0051.JPG	DSCF0051.JPG	406711	768995	GardePro	10s	120	0.6	30	2024-06-24	10:00:08	2024-12-31	9:00:08	2024:07:06	2024-07-06	15:43:35	4.117	C028	Potamochoerus porcus	1	0	DF	452.688	2838.4	Zalime	3302.8	2024-07-06 15:43:35	2024-06-24 10:00:08	2024-12-31 9:00:08	1	604	0.333	33.028
C:\Users\user-1\Desktop\My_PHD\5_Redaction_These\Chap2_Metabarcoding & Census\Census\1_Data_Collection\Dossier4\C028\Potamochoerus porcus\DSCF0051.JPG	DSCF0051.JPG	406711	768995	GardePro	10s	120	0.6	30	2024-06-24	10:00:08	2024-12-31	9:00:08	2024:07:06	2024-07-06	15:43:35	4.117	C028	Potamochoerus porcus	1	0	DF	452.688	2838.4	Zalime	3302.8	2024-07-06 15:43:35	2024-06-24 10:00:08	2024-12-31 9:00:08	1	605	0.333	33.028
C:\Users\user-1\Desktop\My_PHD\5_Redaction_These\Chap2_Metabarcoding & Census\Census\1_Data_Collection\Dossier4\C028\Potamochoerus porcus\DSCF0051.JPG	DSCF0051.JPG	406711	768995	GardePro	10s	120	0.6	30	2024-06-24	10:00:08	2024-12-31	9:00:08	2024:07:06	2024-07-06	15:43:35	4.117	C028	Potamochoerus porcus	1	0	DF	452.688	2838.4	Zalime	3302.8	2024-07-06 15:43:35	2024-06-24 10:00:08	2024-12-31 9:00:08	1	606	0.333	33.028
C:\Users\user-1\Desktop\My_PHD\5_Redaction_These\Chap2_Metabarcoding & Census\Census\1_Data_Collection\Dossier4\C028\Potamochoerus porcus\DSCF0051.JPG	DSCF0051.JPG	406711	768995	GardePro	10s	120	0.6	30	2024-06-24	10:00:08	2024-12-31	9:00:08	2024:07:06	2024-07-06	15:43:35	4.117	C028	Potamochoerus porcus	1	0	DF	452.688	2838.4	Zalime	3302.8	2024-07-06 15:43:35	2024-06-24 10:00:08	2024-12-31 9:00:08	1	607	0.333	33.028
C:\Users\user-1\Desktop\My_PHD\5_Redaction_These\Chap2_Metabarcoding & Census\Census\1_Data_Collection\Dossier4\C028\Potamochoerus porcus\DSCF0052.JPG	DSCF0052.JPG	406711	768995	GardePro	10s	120	0.6	30	2024-06-24	10:00:08	2024-12-31	9:00:08	2024:07:06	2024-07-06	15:43:35	4.117	C028	Potamochoerus porcus	3	-50	DF	452.688	2838.4	Zalime	3302.8	2024-07-06 15:43:35	2024-06-24 10:00:08	2024-12-31 9:00:08	1	608	0.333	33.028
C:\Users\user-1\Desktop\My_PHD\5_Redaction_These\Chap2_Metabarcoding & Census\Census\1_Data_Collection\Dossier4\C028\Potamochoerus porcus\DSCF0052.JPG	DSCF0052.JPG	406711	768995	GardePro	10s	120	0.6	30	2024-06-24	10:00:08	2024-12-31	9:00:08	2024:07:06	2024-07-06	15:43:35	4.117	C028	Potamochoerus porcus	3	-50	DF	452.688	2838.4	Zalime	3302.8	2024-07-06 15:43:35	2024-06-24 10:00:08	2024-12-31 9:00:08	1	609	0.333	33.028
C:\Users\user-1\Desktop\My_PHD\5_Redaction_These\Chap2_Metabarcoding & Census\Census\1_Data_Collection\Dossier4\C028\Potamochoerus porcus\DSCF0052.JPG	DSCF0052.JPG	406711	768995	GardePro	10s	120	0.6	30	2024-06-24	10:00:08	2024-12-31	9:00:08	2024:07:06	2024-07-06	15:43:35	4.117	C028	Potamochoerus porcus	3	-50	DF	452.688	2838.4	Zalime	3302.8	2024-07-06 15:43:35	2024-06-24 10:00:08	2024-12-31 9:00:08	1	610	0.333	33.028
C:\Users\user-1\Desktop\My_PHD\5_Redaction_These\Chap2_Metabarcoding & Census\Census\1_Data_Collection\Dossier4\C028\Potamochoerus porcus\DSCF0052.JPG	DSCF0052.JPG	406711	768995	GardePro	10s	120	0.6	30	2024-06-24	10:00:08	2024-12-31	9:00:08	2024:07:06	2024-07-06	15:43:35	4.117	C028	Potamochoerus porcus	3	-50	DF	452.688	2838.4	Zalime	3302.8	2024-07-06 15:43:35	2024-06-24 10:00:08	2024-12-31 9:00:08	1	611	0.333	33.028
C:\Users\user-1\Desktop\My_PHD\5_Redaction_These\Chap2_Metabarcoding & Census\Census\1_Data_Collection\Dossier4\C028\Potamochoerus porcus\DSCF0053.JPG	DSCF0053.JPG	406711	768995	GardePro	10s	120	0.6	30	2024-06-24	10:00:08	2024-12-31	9:00:08	2024:07:06	2024-07-06	15:43:44	4.118	C028	Potamochoerus porcus	1	-55	DF	452.688	2838.4	Zalime	3302.8	2024-07-06 15:43:44	2024-06-24 10:00:08	2024-12-31 9:00:08	1	612	0.333	33.028
C:\Users\user-1\Desktop\My_PHD\5_Redaction_These\Chap2_Metabarcoding & Census\Census\1_Data_Collection\Dossier4\C028\Potamochoerus porcus\DSCF0053.JPG	DSCF0053.JPG	406711	768995	GardePro	10s	120	0.6	30	2024-06-24	10:00:08	2024-12-31	9:00:08	2024:07:06	2024-07-06	15:43:44	4.118	C028	Potamochoerus porcus	1	-55	DF	452.688	2838.4	Zalime	3302.8	2024-07-06 15:43:44	2024-06-24 10:00:08	2024-12-31 9:00:08	1	613	0.333	33.028
C:\Users\user-1\Desktop\My_PHD\5_Redaction_These\Chap2_Metabarcoding & Census\Census\1_Data_Collection\Dossier4\C028\Potamochoerus porcus\DSCF0054.JPG	DSCF0054.JPG	406711	768995	GardePro	10s	120	0.6	30	2024-06-24	10:00:08	2024-12-31	9:00:08	2024:07:06	2024-07-06	15:43:44	4.118	C028	Potamochoerus porcus	1	-40	DF	452.688	2838.4	Zalime	3302.8	2024-07-06 15:43:44	2024-06-24 10:00:08	2024-12-31 9:00:08	1	614	0.333	33.028
C:\Users\user-1\Desktop\My_PHD\5_Redaction_These\Chap2_Metabarcoding & Census\Census\1_Data_Collection\Dossier4\C028\Potamochoerus porcus\DSCF0054.JPG	DSCF0054.JPG	406711	768995	GardePro	10s	120	0.6	30	2024-06-24	10:00:08	2024-12-31	9:00:08	2024:07:06	2024-07-06	15:43:44	4.118	C028	Potamochoerus porcus	1	-40	DF	452.688	2838.4	Zalime	3302.8	2024-07-06 15:43:44	2024-06-24 10:00:08	2024-12-31 9:00:08	1	615	0.333	33.028
C:\Users\user-1\Desktop\My_PHD\5_Redaction_These\Chap2_Metabarcoding & Census\Census\1_Data_Collection\Dossier4\C028\Potamochoerus porcus\DSCF0055.JPG	DSCF0055.JPG	406711	768995	GardePro	10s	120	0.6	30	2024-06-24	10:00:08	2024-12-31	9:00:08	2024:07:06	2024-07-06	15:43:48	4.118	C028	Potamochoerus porcus	1	50	DF	452.688	2838.4	Zalime	3302.8	2024-07-06 15:43:48	2024-06-24 10:00:08	2024-12-31 9:00:08	1	616	0.333	33.028
C:\Users\user-1\Desktop\My_PHD\5_Redaction_These\Chap2_Metabarcoding & Census\Census\1_Data_Collection\Dossier4\C028\Potamochoerus porcus\DSCF0055.JPG	DSCF0055.JPG	406711	768995	GardePro	10s	120	0.6	30	2024-06-24	10:00:08	2024-12-31	9:00:08	2024:07:06	2024-07-06	15:43:48	4.118	C028	Potamochoerus porcus	1	50	DF	452.688	2838.4	Zalime	3302.8	2024-07-06 15:43:48	2024-06-24 10:00:08	2024-12-31 9:00:08	1	617	0.333	33.028
C:\Users\user-1\Desktop\My_PHD\5_Redaction_These\Chap2_Metabarcoding & Census\Census\1_Data_Collection\Dossier4\C028\Potamochoerus porcus\DSCF0056.JPG	DSCF0056.JPG	406711	768995	GardePro	10s	120	0.6	30	2024-06-24	10:00:08	2024-12-31	9:00:08	2024:07:06	2024-07-06	15:43:48	4.118	C028	Potamochoerus porcus	1	50	DF	452.688	2838.4	Zalime	3302.8	2024-07-06 15:43:48	2024-06-24 10:00:08	2024-12-31 9:00:08	1	618	0.333	33.028
C:\Users\user-1\Desktop\My_PHD\5_Redaction_These\Chap2_Metabarcoding & Census\Census\1_Data_Collection\Dossier4\C028\Potamochoerus porcus\DSCF0056.JPG	DSCF0056.JPG	406711	768995	GardePro	10s	120	0.6	30	2024-06-24	10:00:08	2024-12-31	9:00:08	2024:07:06	2024-07-06	15:43:48	4.118	C028	Potamochoerus porcus	1	50	DF	452.688	2838.4	Zalime	3302.8	2024-07-06 15:43:48	2024-06-24 10:00:08	2024-12-31 9:00:08	1	619	0.333	33.028
C:\Users\user-1\Desktop\My_PHD\5_Redaction_These\Chap2_Metabarcoding & Census\Census\1_Data_Collection\Dossier4\C028\Potamochoerus porcus\DSCF0057.JPG	DSCF0057.JPG	406711	768995	GardePro	10s	120	0.6	30	2024-06-24	10:00:08	2024-12-31	9:00:08	2024:07:06	2024-07-06	15:43:53	4.118	C028	Potamochoerus porcus	1	50	DF	452.688	2838.4	Zalime	3302.8	2024-07-06 15:43:53	2024-06-24 10:00:08	2024-12-31 9:00:08	1	620	0.333	33.028
C:\Users\user-1\Desktop\My_PHD\5_Redaction_These\Chap2_Metabarcoding & Census\Census\1_Data_Collection\Dossier4\C028\Potamochoerus porcus\DSCF0058.JPG	DSCF0058.JPG	406711	768995	GardePro	10s	120	0.6	30	2024-06-24	10:00:08	2024-12-31	9:00:08	2024:07:06	2024-07-06	15:43:53	4.118	C028	Potamochoerus porcus	1	55	DF	452.688	2838.4	Zalime	3302.8	2024-07-06 15:43:53	2024-06-24 10:00:08	2024-12-31 9:00:08	1	621	0.333	33.028
C:\Users\user-1\Desktop\My_PHD\5_Redaction_These\Chap2_Metabarcoding & Census\Census\1_Data_Collection\Dossier4\C031\Ratus sp\DSCF0007.JPG	DSCF0007.JPG	401727	769892	GardePro	10s	120	0.6	30	2024-07-01	14:54:02	2024-12-31	13:54:02	2024:07:06	2024-07-06	1:30:02	0.393	C031	Praomys sp.	0.5	50	DF	713.901	1884.32	Koto	3302.8	2024-07-06 1:30:02	2024-07-01 14:54:02	2024-12-31 13:54:02	1	622	0.333	33.028
C:\Users\user-1\Desktop\My_PHD\5_Redaction_These\Chap2_Metabarcoding & Census\Census\1_Data_Collection\Dossier4\C031\Ratus sp\DSCF0008.JPG	DSCF0008.JPG	401727	769892	GardePro	10s	120	0.6	30	2024-07-01	14:54:02	2024-12-31	13:54:02	2024:07:06	2024-07-06	1:30:02	0.393	C031	Praomys sp.	0.5	50	DF	713.901	1884.32	Koto	3302.8	2024-07-06 1:30:02	2024-07-01 14:54:02	2024-12-31 13:54:02	1	623	0.333	33.028
C:\Users\user-1\Desktop\My_PHD\5_Redaction_These\Chap2_Metabarcoding & Census\Census\1_Data_Collection\Dossier4\C031\Ratus sp\DSCF0009.JPG	DSCF0009.JPG	401727	769892	GardePro	10s	120	0.6	30	2024-07-01	14:54:02	2024-12-31	13:54:02	2024:07:06	2024-07-06	1:30:16	0.394	C031	Praomys sp.	0.5	50	DF	713.901	1884.32	Koto	3302.8	2024-07-06 1:30:16	2024-07-01 14:54:02	2024-12-31 13:54:02	1	624	0.333	33.028
C:\Users\user-1\Desktop\My_PHD\5_Redaction_These\Chap2_Metabarcoding & Census\Census\1_Data_Collection\Dossier4\C031\Ratus sp\DSCF0010.JPG	DSCF0010.JPG	401727	769892	GardePro	10s	120	0.6	30	2024-07-01	14:54:02	2024-12-31	13:54:02	2024:07:06	2024-07-06	1:30:16	0.394	C031	Praomys sp.	0.5	50	DF	713.901	1884.32	Koto	3302.8	2024-07-06 1:30:16	2024-07-01 14:54:02	2024-12-31 13:54:02	1	625	0.333	33.028
C:\Users\user-1\Desktop\My_PHD\5_Redaction_These\Chap2_Metabarcoding & Census\Census\1_Data_Collection\Dossier4\C032\Cercopithecus mona\DSCF0007.JPG	DSCF0007.JPG	402666	769980	GardePro	10s	120	0.6	30	2024-07-01	10:18:13	2024-12-31	9:18:13	2024:07:06	2024-07-06	13:55:23	3.645	C032	Cercopithecus mona	4	40	CF	486.646	1491.22	Koto	1050.91	2024-07-06 13:55:23	2024-07-01 10:18:13	2024-12-31 9:18:13	1	626	0.333	10.5091
C:\Users\user-1\Desktop\My_PHD\5_Redaction_These\Chap2_Metabarcoding & Census\Census\1_Data_Collection\Dossier4\C032\Cercopithecus mona\DSCF0008.JPG	DSCF0008.JPG	402666	769980	GardePro	10s	120	0.6	30	2024-07-01	10:18:13	2024-12-31	9:18:13	2024:07:06	2024-07-06	13:55:23	3.645	C032	Cercopithecus mona	4	40	CF	486.646	1491.22	Koto	1050.91	2024-07-06 13:55:23	2024-07-01 10:18:13	2024-12-31 9:18:13	1	627	0.333	10.5091
C:\Users\user-1\Desktop\My_PHD\5_Redaction_These\Chap2_Metabarcoding & Census\Census\1_Data_Collection\Dossier5\C033\Crossarchus obscurus\DSCF0091.JPG	DSCF0091.JPG	403721	769978	GardePro	10s	120	0.6	30	2024-06-27	13:20:57	2024-12-31	12:20:57	2024:07:06	2024-07-06	7:37:15	1.995	C033	Crossarchus platycephalus	3.5	-10	DF	394.703	1701.99	Koto	3302.8	2024-07-06 7:37:15	2024-06-27 13:20:57	2024-12-31 12:20:57	1	628	0.333	33.028
C:\Users\user-1\Desktop\My_PHD\5_Redaction_These\Chap2_Metabarcoding & Census\Census\1_Data_Collection\Dossier5\C033\Crossarchus obscurus\DSCF0092.JPG	DSCF0092.JPG	403721	769978	GardePro	10s	120	0.6	30	2024-06-27	13:20:57	2024-12-31	12:20:57	2024:07:06	2024-07-06	7:37:15	1.995	C033	Crossarchus platycephalus	2.5	-37	DF	394.703	1701.99	Koto	3302.8	2024-07-06 7:37:15	2024-06-27 13:20:57	2024-12-31 12:20:57	1	629	0.333	33.028
C:\Users\user-1\Desktop\My_PHD\5_Redaction_These\Chap2_Metabarcoding & Census\Census\1_Data_Collection\Dossier5\C033\Crossarchus obscurus\DSCF0093.JPG	DSCF0093.JPG	403721	769978	GardePro	10s	120	0.6	30	2024-06-27	13:20:57	2024-12-31	12:20:57	2024:07:06	2024-07-06	7:37:49	1.998	C033	Crossarchus platycephalus	7.5	-25	DF	394.703	1701.99	Koto	3302.8	2024-07-06 7:37:49	2024-06-27 13:20:57	2024-12-31 12:20:57	1	630	0.333	33.028
C:\Users\user-1\Desktop\My_PHD\5_Redaction_These\Chap2_Metabarcoding & Census\Census\1_Data_Collection\Dossier5\C033\Crossarchus obscurus\DSCF0093.JPG	DSCF0093.JPG	403721	769978	GardePro	10s	120	0.6	30	2024-06-27	13:20:57	2024-12-31	12:20:57	2024:07:06	2024-07-06	7:37:49	1.998	C033	Crossarchus platycephalus	7.5	-25	DF	394.703	1701.99	Koto	3302.8	2024-07-06 7:37:49	2024-06-27 13:20:57	2024-12-31 12:20:57	1	631	0.333	33.028
C:\Users\user-1\Desktop\My_PHD\5_Redaction_These\Chap2_Metabarcoding & Census\Census\1_Data_Collection\Dossier5\C033\Crossarchus obscurus\DSCF0093.JPG	DSCF0093.JPG	403721	769978	GardePro	10s	120	0.6	30	2024-06-27	13:20:57	2024-12-31	12:20:57	2024:07:06	2024-07-06	7:37:49	1.998	C033	Crossarchus platycephalus	7.5	-25	DF	394.703	1701.99	Koto	3302.8	2024-07-06 7:37:49	2024-06-27 13:20:57	2024-12-31 12:20:57	1	632	0.333	33.028
C:\Users\user-1\Desktop\My_PHD\5_Redaction_These\Chap2_Metabarcoding & Census\Census\1_Data_Collection\Dossier5\C033\Crossarchus obscurus\DSCF0094.JPG	DSCF0094.JPG	403721	769978	GardePro	10s	120	0.6	30	2024-06-27	13:20:57	2024-12-31	12:20:57	2024:07:06	2024-07-06	7:37:49	1.998	C033	Crossarchus platycephalus	7.5	-25	DF	394.703	1701.99	Koto	3302.8	2024-07-06 7:37:49	2024-06-27 13:20:57	2024-12-31 12:20:57	1	633	0.333	33.028
C:\Users\user-1\Desktop\My_PHD\5_Redaction_These\Chap2_Metabarcoding & Census\Census\1_Data_Collection\Dossier5\C033\Crossarchus obscurus\DSCF0094.JPG	DSCF0094.JPG	403721	769978	GardePro	10s	120	0.6	30	2024-06-27	13:20:57	2024-12-31	12:20:57	2024:07:06	2024-07-06	7:37:49	1.998	C033	Crossarchus platycephalus	7.5	-25	DF	394.703	1701.99	Koto	3302.8	2024-07-06 7:37:49	2024-06-27 13:20:57	2024-12-31 12:20:57	1	634	0.333	33.028
C:\Users\user-1\Desktop\My_PHD\5_Redaction_These\Chap2_Metabarcoding & Census\Census\1_Data_Collection\Dossier5\C033\Crossarchus obscurus\DSCF0094.JPG	DSCF0094.JPG	403721	769978	GardePro	10s	120	0.6	30	2024-06-27	13:20:57	2024-12-31	12:20:57	2024:07:06	2024-07-06	7:37:49	1.998	C033	Crossarchus platycephalus	7.5	-25	DF	394.703	1701.99	Koto	3302.8	2024-07-06 7:37:49	2024-06-27 13:20:57	2024-12-31 12:20:57	1	635	0.333	33.028
C:\Users\user-1\Desktop\My_PHD\5_Redaction_These\Chap2_Metabarcoding & Census\Census\1_Data_Collection\Dossier1\C011\Xerus erythropus\DSCF0007.JPG	DSCF0007.JPG	404911	766437	GardePro	10s	120	0.6	30	2024-07-06	15:27:57	2024-12-31	14:27:57	2024:07:07	2024-07-07	13:43:53	3.595	C011	Xerus erythropus	3	0	CF	736.954	4843.88	Koto	1050.91	2024-07-07 13:43:53	2024-07-06 15:27:57	2024-12-31 14:27:57	1	636	0.333	10.5091
C:\Users\user-1\Desktop\My_PHD\5_Redaction_These\Chap2_Metabarcoding & Census\Census\1_Data_Collection\Dossier1\C011\Xerus erythropus\DSCF0008.JPG	DSCF0008.JPG	404911	766437	GardePro	10s	120	0.6	30	2024-07-06	15:27:57	2024-12-31	14:27:57	2024:07:07	2024-07-07	13:43:54	3.595	C011	Xerus erythropus	3	0	CF	736.954	4843.88	Koto	1050.91	2024-07-07 13:43:54	2024-07-06 15:27:57	2024-12-31 14:27:57	1	637	0.333	10.5091
C:\Users\user-1\Desktop\My_PHD\5_Redaction_These\Chap2_Metabarcoding & Census\Census\1_Data_Collection\Dossier1\C011\Xerus erythropus\DSCF0009.JPG	DSCF0009.JPG	404911	766437	GardePro	10s	120	0.6	30	2024-07-06	15:27:57	2024-12-31	14:27:57	2024:07:07	2024-07-07	13:44:01	3.595	C011	Xerus erythropus	3	10	CF	736.954	4843.88	Koto	1050.91	2024-07-07 13:44:01	2024-07-06 15:27:57	2024-12-31 14:27:57	1	638	0.333	10.5091
C:\Users\user-1\Desktop\My_PHD\5_Redaction_These\Chap2_Metabarcoding & Census\Census\1_Data_Collection\Dossier1\C011\Xerus erythropus\DSCF0010.JPG	DSCF0010.JPG	404911	766437	GardePro	10s	120	0.6	30	2024-07-06	15:27:57	2024-12-31	14:27:57	2024:07:07	2024-07-07	13:44:02	3.596	C011	Xerus erythropus	3	10	CF	736.954	4843.88	Koto	1050.91	2024-07-07 13:44:02	2024-07-06 15:27:57	2024-12-31 14:27:57	1	639	0.333	10.5091
C:\Users\user-1\Desktop\My_PHD\5_Redaction_These\Chap2_Metabarcoding & Census\Census\1_Data_Collection\Dossier3\C026\Genetta genetta\DSCF0029.JPG	DSCF0029.JPG	404727	768963	GardePro	10s	120	0.6	30	2024-06-24	12:34:07	2024-12-31	11:34:07	2024:07:07	2024-07-07	19:57:07	5.223	C026	Genetta pardina/maculata	5	5	DF	1463.17	3087.76	Koto	3302.8	2024-07-07 19:57:07	2024-06-24 12:34:07	2024-12-31 11:34:07	1	640	0.333	33.028
C:\Users\user-1\Desktop\My_PHD\5_Redaction_These\Chap2_Metabarcoding & Census\Census\1_Data_Collection\Dossier3\C026\Genetta genetta\DSCF0030.JPG	DSCF0030.JPG	404727	768963	GardePro	10s	120	0.6	30	2024-06-24	12:34:07	2024-12-31	11:34:07	2024:07:07	2024-07-07	19:57:07	5.223	C026	Genetta pardina/maculata	5	5	DF	1463.17	3087.76	Koto	3302.8	2024-07-07 19:57:07	2024-06-24 12:34:07	2024-12-31 11:34:07	1	641	0.333	33.028
C:\Users\user-1\Desktop\My_PHD\5_Redaction_These\Chap2_Metabarcoding & Census\Census\1_Data_Collection\Dossier3\C026\Genetta genetta\DSCF0031.JPG	DSCF0031.JPG	404727	768963	GardePro	10s	120	0.6	30	2024-06-24	12:34:07	2024-12-31	11:34:07	2024:07:07	2024-07-07	19:57:16	5.224	C026	Genetta pardina/maculata	5	20	DF	1463.17	3087.76	Koto	3302.8	2024-07-07 19:57:16	2024-06-24 12:34:07	2024-12-31 11:34:07	1	642	0.333	33.028
C:\Users\user-1\Desktop\My_PHD\5_Redaction_These\Chap2_Metabarcoding & Census\Census\1_Data_Collection\Dossier3\C026\Genetta genetta\DSCF0032.JPG	DSCF0032.JPG	404727	768963	GardePro	10s	120	0.6	30	2024-06-24	12:34:07	2024-12-31	11:34:07	2024:07:07	2024-07-07	19:57:16	5.224	C026	Genetta pardina/maculata	5	20	DF	1463.17	3087.76	Koto	3302.8	2024-07-07 19:57:16	2024-06-24 12:34:07	2024-12-31 11:34:07	1	643	0.333	33.028
C:\Users\user-1\Desktop\My_PHD\5_Redaction_These\Chap2_Metabarcoding & Census\Census\1_Data_Collection\Dossier4\C027\Crossarchus obscurus\DSCF0147.JPG	DSCF0147.JPG	405682	768980	GardePro	10s	120	0.6	30	2024-06-24	11:13:40	2024-12-31	10:13:40	2024:07:07	2024-07-07	13:43:48	3.595	C027	Crossarchus platycephalus	8	-25	DF	1322.08	3769.26	Koto	3302.8	2024-07-07 13:43:48	2024-06-24 11:13:40	2024-12-31 10:13:40	1	644	0.333	33.028
C:\Users\user-1\Desktop\My_PHD\5_Redaction_These\Chap2_Metabarcoding & Census\Census\1_Data_Collection\Dossier4\C027\Crossarchus obscurus\DSCF0148.JPG	DSCF0148.JPG	405682	768980	GardePro	10s	120	0.6	30	2024-06-24	11:13:40	2024-12-31	10:13:40	2024:07:07	2024-07-07	13:43:48	3.595	C027	Crossarchus platycephalus	8	-25	DF	1322.08	3769.26	Koto	3302.8	2024-07-07 13:43:48	2024-06-24 11:13:40	2024-12-31 10:13:40	1	645	0.333	33.028
C:\Users\user-1\Desktop\My_PHD\5_Redaction_These\Chap2_Metabarcoding & Census\Census\1_Data_Collection\Dossier5\C033\Genetta genetta\DSCF0095.JPG	DSCF0095.JPG	403721	769978	GardePro	10s	120	0.6	30	2024-06-27	13:20:57	2024-12-31	12:20:57	2024:07:07	2024-07-07	6:20:35	1.661	C033	Genetta pardina/maculata	3	0	DF	394.703	1701.99	Koto	3302.8	2024-07-07 6:20:35	2024-06-27 13:20:57	2024-12-31 12:20:57	1	646	0.333	33.028
C:\Users\user-1\Desktop\My_PHD\5_Redaction_These\Chap2_Metabarcoding & Census\Census\1_Data_Collection\Dossier5\C033\Genetta genetta\DSCF0096.JPG	DSCF0096.JPG	403721	769978	GardePro	10s	120	0.6	30	2024-06-27	13:20:57	2024-12-31	12:20:57	2024:07:07	2024-07-07	6:20:35	1.661	C033	Genetta pardina/maculata	2.5	0	DF	394.703	1701.99	Koto	3302.8	2024-07-07 6:20:35	2024-06-27 13:20:57	2024-12-31 12:20:57	1	647	0.333	33.028
C:\Users\user-1\Desktop\My_PHD\5_Redaction_These\Chap2_Metabarcoding & Census\Census\1_Data_Collection\Dossier2\C016\Crossarchus obscurus\DSCF0011.JPG	DSCF0011.JPG	401717	767985	GardePro	10s	120	0.6	30	2024-06-26	16:23:40	2024-12-31	15:23:40	2024:07:08	2024-07-08	18:38:23	4.88	C016	Crossarchus platycephalus	5	5	DF	1338.45	3671.46	Koto	3302.8	2024-07-08 18:38:23	2024-06-26 16:23:40	2024-12-31 15:23:40	1	648	0.333	33.028
C:\Users\user-1\Desktop\My_PHD\5_Redaction_These\Chap2_Metabarcoding & Census\Census\1_Data_Collection\Dossier2\C016\Crossarchus obscurus\DSCF0012.JPG	DSCF0012.JPG	401717	767985	GardePro	10s	120	0.6	30	2024-06-26	16:23:40	2024-12-31	15:23:40	2024:07:08	2024-07-08	18:38:24	4.88	C016	Crossarchus platycephalus	4	-35	DF	1338.45	3671.46	Koto	3302.8	2024-07-08 18:38:24	2024-06-26 16:23:40	2024-12-31 15:23:40	1	649	0.333	33.028
C:\Users\user-1\Desktop\My_PHD\5_Redaction_These\Chap2_Metabarcoding & Census\Census\1_Data_Collection\Dossier3\C026\Tragelaphus scriptus\DSCF0033.JPG	DSCF0033.JPG	404727	768963	GardePro	10s	120	0.6	30	2024-06-24	12:34:07	2024-12-31	11:34:07	2024:07:08	2024-07-08	20:00:46	5.239	C026	Tragelaphus scriptus	4.5	25	DF	1463.17	3087.76	Koto	3302.8	2024-07-08 20:00:46	2024-06-24 12:34:07	2024-12-31 11:34:07	1	650	0.333	33.028
C:\Users\user-1\Desktop\My_PHD\5_Redaction_These\Chap2_Metabarcoding & Census\Census\1_Data_Collection\Dossier3\C026\Tragelaphus scriptus\DSCF0034.JPG	DSCF0034.JPG	404727	768963	GardePro	10s	120	0.6	30	2024-06-24	12:34:07	2024-12-31	11:34:07	2024:07:08	2024-07-08	20:00:46	5.239	C026	Tragelaphus scriptus	4.5	20	DF	1463.17	3087.76	Koto	3302.8	2024-07-08 20:00:46	2024-06-24 12:34:07	2024-12-31 11:34:07	1	651	0.333	33.028
C:\Users\user-1\Desktop\My_PHD\5_Redaction_These\Chap2_Metabarcoding & Census\Census\1_Data_Collection\Dossier3\C026\Tragelaphus scriptus\DSCF0035.JPG	DSCF0035.JPG	404727	768963	GardePro	10s	120	0.6	30	2024-06-24	12:34:07	2024-12-31	11:34:07	2024:07:08	2024-07-08	20:00:51	5.24	C026	Tragelaphus scriptus	4	0	DF	1463.17	3087.76	Koto	3302.8	2024-07-08 20:00:51	2024-06-24 12:34:07	2024-12-31 11:34:07	1	652	0.333	33.028
C:\Users\user-1\Desktop\My_PHD\5_Redaction_These\Chap2_Metabarcoding & Census\Census\1_Data_Collection\Dossier3\C026\Tragelaphus scriptus\DSCF0036.JPG	DSCF0036.JPG	404727	768963	GardePro	10s	120	0.6	30	2024-06-24	12:34:07	2024-12-31	11:34:07	2024:07:08	2024-07-08	20:00:51	5.24	C026	Tragelaphus scriptus	3.8	0	DF	1463.17	3087.76	Koto	3302.8	2024-07-08 20:00:51	2024-06-24 12:34:07	2024-12-31 11:34:07	1	653	0.333	33.028
C:\Users\user-1\Desktop\My_PHD\5_Redaction_These\Chap2_Metabarcoding & Census\Census\1_Data_Collection\Dossier3\C026\Tragelaphus scriptus\DSCF0037.JPG	DSCF0037.JPG	404727	768963	GardePro	10s	120	0.6	30	2024-06-24	12:34:07	2024-12-31	11:34:07	2024:07:08	2024-07-08	20:00:57	5.24	C026	Tragelaphus scriptus	3.5	-38	DF	1463.17	3087.76	Koto	3302.8	2024-07-08 20:00:57	2024-06-24 12:34:07	2024-12-31 11:34:07	1	654	0.333	33.028
C:\Users\user-1\Desktop\My_PHD\5_Redaction_These\Chap2_Metabarcoding & Census\Census\1_Data_Collection\Dossier3\C026\Tragelaphus scriptus\DSCF0038.JPG	DSCF0038.JPG	404727	768963	GardePro	10s	120	0.6	30	2024-06-24	12:34:07	2024-12-31	11:34:07	2024:07:08	2024-07-08	20:00:57	5.24	C026	Tragelaphus scriptus	3.5	-38	DF	1463.17	3087.76	Koto	3302.8	2024-07-08 20:00:57	2024-06-24 12:34:07	2024-12-31 11:34:07	1	655	0.333	33.028
C:\Users\user-1\Desktop\My_PHD\5_Redaction_These\Chap2_Metabarcoding & Census\Census\1_Data_Collection\Dossier5\C033\Genetta genetta\DSCF0101.JPG	DSCF0101.JPG	403721	769978	GardePro	10s	120	0.6	30	2024-06-27	13:20:57	2024-12-31	12:20:57	2024:07:08	2024-07-08	13:04:42	3.424	C033	Genetta pardina/maculata	4	-10	DF	394.703	1701.99	Koto	3302.8	2024-07-08 13:04:42	2024-06-27 13:20:57	2024-12-31 12:20:57	1	656	0.333	33.028
C:\Users\user-1\Desktop\My_PHD\5_Redaction_These\Chap2_Metabarcoding & Census\Census\1_Data_Collection\Dossier5\C033\Genetta genetta\DSCF0102.JPG	DSCF0102.JPG	403721	769978	GardePro	10s	120	0.6	30	2024-06-27	13:20:57	2024-12-31	12:20:57	2024:07:08	2024-07-08	13:04:42	3.424	C033	Genetta pardina/maculata	4.5	-10	DF	394.703	1701.99	Koto	3302.8	2024-07-08 13:04:42	2024-06-27 13:20:57	2024-12-31 12:20:57	1	657	0.333	33.028
C:\Users\user-1\Desktop\My_PHD\5_Redaction_These\Chap2_Metabarcoding & Census\Census\1_Data_Collection\Dossier5\C036\Cercopithecus mona\07080023.JPG	07080023.JPG	406699	769933	BUSHNEL	10s	35	0.6	33.5	2024-06-27	10:02:29	2024-12-31	9:02:29	2024:07:08	2024-07-08	6:13:38	1.63	C036	Cercopithecus mona	3.5	-6	DF	133.824	2649.54	Zalime	3302.8	2024-07-08 6:13:38	2024-06-27 10:02:29	2024-12-31 9:02:29	1	658	0.097	33.028
C:\Users\user-1\Desktop\My_PHD\5_Redaction_These\Chap2_Metabarcoding & Census\Census\1_Data_Collection\Dossier5\C036\Cercopithecus mona\07080024.JPG	07080024.JPG	406699	769933	BUSHNEL	10s	35	0.6	33.5	2024-06-27	10:02:29	2024-12-31	9:02:29	2024:07:08	2024-07-08	6:13:39	1.63	C036	Cercopithecus mona	4	0	DF	133.824	2649.54	Zalime	3302.8	2024-07-08 6:13:39	2024-06-27 10:02:29	2024-12-31 9:02:29	1	659	0.097	33.028
C:\Users\user-1\Desktop\My_PHD\5_Redaction_These\Chap2_Metabarcoding & Census\Census\1_Data_Collection\Dossier5\C036\Cercopithecus mona\07080025.JPG	07080025.JPG	406699	769933	BUSHNEL	10s	35	0.6	33.5	2024-06-27	10:02:29	2024-12-31	9:02:29	2024:07:08	2024-07-08	6:15:35	1.639	C036	Cercopithecus mona	4.5	0	DF	133.824	2649.54	Zalime	3302.8	2024-07-08 6:15:35	2024-06-27 10:02:29	2024-12-31 9:02:29	1	660	0.097	33.028
C:\Users\user-1\Desktop\My_PHD\5_Redaction_These\Chap2_Metabarcoding & Census\Census\1_Data_Collection\Dossier5\C036\Cercopithecus mona\07080026.JPG	07080026.JPG	406699	769933	BUSHNEL	10s	35	0.6	33.5	2024-06-27	10:02:29	2024-12-31	9:02:29	2024:07:08	2024-07-08	6:15:35	1.639	C036	Cercopithecus mona	4.5	0	DF	133.824	2649.54	Zalime	3302.8	2024-07-08 6:15:35	2024-06-27 10:02:29	2024-12-31 9:02:29	1	661	0.097	33.028
C:\Users\user-1\Desktop\My_PHD\5_Redaction_These\Chap2_Metabarcoding & Census\Census\1_Data_Collection\Dossier2\C019\Crossarchus obscurus\07080041.JPG	07080041.JPG	404700	767950	BUSHNEL	10s	35	0.6	33.5	2024-06-26	12:02:59	2024-12-31	11:02:59	2024:07:08	2024-07-08	07:19:14	1.91652	C019	Crossarchus platycephalus	2	0	DF	1711.1	3936.84	Koto	3302.8	2024-07-08 07:19:14	2024-06-26 12:02:59	2024-12-31 11:02:59	1	662	0.097	33.028
C:\Users\user-1\Desktop\My_PHD\5_Redaction_These\Chap2_Metabarcoding & Census\Census\1_Data_Collection\Dossier2\C019\Crossarchus obscurus\07080041.JPG	07080041.JPG	404700	767950	BUSHNEL	10s	35	0.6	33.5	2024-06-26	12:02:59	2024-12-31	11:02:59	2024:07:08	2024-07-08	07:19:14	1.91652	C019	Crossarchus platycephalus	2	0	DF	1711.1	3936.84	Koto	3302.8	2024-07-08 07:19:14	2024-06-26 12:02:59	2024-12-31 11:02:59	1	663	0.097	33.028
C:\Users\user-1\Desktop\My_PHD\5_Redaction_These\Chap2_Metabarcoding & Census\Census\1_Data_Collection\Dossier2\C019\Crossarchus obscurus\07080041.JPG	07080041.JPG	404700	767950	BUSHNEL	10s	35	0.6	33.5	2024-06-26	12:02:59	2024-12-31	11:02:59	2024:07:08	2024-07-08	07:19:14	1.91652	C019	Crossarchus platycephalus	2	0	DF	1711.1	3936.84	Koto	3302.8	2024-07-08 07:19:14	2024-06-26 12:02:59	2024-12-31 11:02:59	1	664	0.097	33.028
C:\Users\user-1\Desktop\My_PHD\5_Redaction_These\Chap2_Metabarcoding & Census\Census\1_Data_Collection\Dossier2\C019\Crossarchus obscurus\07080041.JPG	07080041.JPG	404700	767950	BUSHNEL	10s	35	0.6	33.5	2024-06-26	12:02:59	2024-12-31	11:02:59	2024:07:08	2024-07-08	07:19:14	1.91652	C019	Crossarchus platycephalus	2	0	DF	1711.1	3936.84	Koto	3302.8	2024-07-08 07:19:14	2024-06-26 12:02:59	2024-12-31 11:02:59	1	665	0.097	33.028
C:\Users\user-1\Desktop\My_PHD\5_Redaction_These\Chap2_Metabarcoding & Census\Census\1_Data_Collection\Dossier2\C019\Crossarchus obscurus\07080041.JPG	07080041.JPG	404700	767950	BUSHNEL	10s	35	0.6	33.5	2024-06-26	12:02:59	2024-12-31	11:02:59	2024:07:08	2024-07-08	07:19:14	1.91652	C019	Crossarchus platycephalus	2	0	DF	1711.1	3936.84	Koto	3302.8	2024-07-08 07:19:14	2024-06-26 12:02:59	2024-12-31 11:02:59	1	666	0.097	33.028
C:\Users\user-1\Desktop\My_PHD\5_Redaction_These\Chap2_Metabarcoding & Census\Census\1_Data_Collection\Dossier2\C019\Crossarchus obscurus\07080041.JPG	07080041.JPG	404700	767950	BUSHNEL	10s	35	0.6	33.5	2024-06-26	12:02:59	2024-12-31	11:02:59	2024:07:08	2024-07-08	07:19:14	1.91652	C019	Crossarchus platycephalus	2	0	DF	1711.1	3936.84	Koto	3302.8	2024-07-08 07:19:14	2024-06-26 12:02:59	2024-12-31 11:02:59	1	667	0.097	33.028
C:\Users\user-1\Desktop\My_PHD\5_Redaction_These\Chap2_Metabarcoding & Census\Census\1_Data_Collection\Dossier2\C019\Crossarchus obscurus\07080042.JPG	07080042.JPG	404700	767950	BUSHNEL	10s	35	0.6	33.5	2024-06-26	12:02:59	2024-12-31	11:02:59	2024:07:08	2024-07-08	07:19:14	1.91652	C019	Crossarchus platycephalus	2	0	DF	1711.1	3936.84	Koto	3302.8	2024-07-08 07:19:14	2024-06-26 12:02:59	2024-12-31 11:02:59	1	668	0.097	33.028
C:\Users\user-1\Desktop\My_PHD\5_Redaction_These\Chap2_Metabarcoding & Census\Census\1_Data_Collection\Dossier2\C019\Crossarchus obscurus\07080042.JPG	07080042.JPG	404700	767950	BUSHNEL	10s	35	0.6	33.5	2024-06-26	12:02:59	2024-12-31	11:02:59	2024:07:08	2024-07-08	07:19:14	1.91652	C019	Crossarchus platycephalus	2	0	DF	1711.1	3936.84	Koto	3302.8	2024-07-08 07:19:14	2024-06-26 12:02:59	2024-12-31 11:02:59	1	669	0.097	33.028
C:\Users\user-1\Desktop\My_PHD\5_Redaction_These\Chap2_Metabarcoding & Census\Census\1_Data_Collection\Dossier2\C019\Crossarchus obscurus\07080042.JPG	07080042.JPG	404700	767950	BUSHNEL	10s	35	0.6	33.5	2024-06-26	12:02:59	2024-12-31	11:02:59	2024:07:08	2024-07-08	07:19:14	1.91652	C019	Crossarchus platycephalus	2	0	DF	1711.1	3936.84	Koto	3302.8	2024-07-08 07:19:14	2024-06-26 12:02:59	2024-12-31 11:02:59	1	670	0.097	33.028
C:\Users\user-1\Desktop\My_PHD\5_Redaction_These\Chap2_Metabarcoding & Census\Census\1_Data_Collection\Dossier2\C019\Crossarchus obscurus\07080042.JPG	07080042.JPG	404700	767950	BUSHNEL	10s	35	0.6	33.5	2024-06-26	12:02:59	2024-12-31	11:02:59	2024:07:08	2024-07-08	07:19:14	1.91652	C019	Crossarchus platycephalus	2	0	DF	1711.1	3936.84	Koto	3302.8	2024-07-08 07:19:14	2024-06-26 12:02:59	2024-12-31 11:02:59	1	671	0.097	33.028
C:\Users\user-1\Desktop\My_PHD\5_Redaction_These\Chap2_Metabarcoding & Census\Census\1_Data_Collection\Dossier2\C019\Crossarchus obscurus\07080042.JPG	07080042.JPG	404700	767950	BUSHNEL	10s	35	0.6	33.5	2024-06-26	12:02:59	2024-12-31	11:02:59	2024:07:08	2024-07-08	07:19:14	1.91652	C019	Crossarchus platycephalus	2	0	DF	1711.1	3936.84	Koto	3302.8	2024-07-08 07:19:14	2024-06-26 12:02:59	2024-12-31 11:02:59	1	672	0.097	33.028
C:\Users\user-1\Desktop\My_PHD\5_Redaction_These\Chap2_Metabarcoding & Census\Census\1_Data_Collection\Dossier2\C019\Crossarchus obscurus\07080042.JPG	07080042.JPG	404700	767950	BUSHNEL	10s	35	0.6	33.5	2024-06-26	12:02:59	2024-12-31	11:02:59	2024:07:08	2024-07-08	07:19:14	1.91652	C019	Crossarchus platycephalus	2	0	DF	1711.1	3936.84	Koto	3302.8	2024-07-08 07:19:14	2024-06-26 12:02:59	2024-12-31 11:02:59	1	673	0.097	33.028
C:\Users\user-1\Desktop\My_PHD\5_Redaction_These\Chap2_Metabarcoding & Census\Census\1_Data_Collection\Dossier2\C019\Crossarchus obscurus\07080043.JPG	07080043.JPG	404700	767950	BUSHNEL	10s	35	0.6	33.5	2024-06-26	12:02:59	2024-12-31	11:02:59	2024:07:08	2024-07-08	07:21:16	1.92539	C019	Crossarchus platycephalus	2.5	-3	DF	1711.1	3936.84	Koto	3302.8	2024-07-08 07:21:16	2024-06-26 12:02:59	2024-12-31 11:02:59	1	674	0.097	33.028
C:\Users\user-1\Desktop\My_PHD\5_Redaction_These\Chap2_Metabarcoding & Census\Census\1_Data_Collection\Dossier2\C019\Crossarchus obscurus\07080043.JPG	07080043.JPG	404700	767950	BUSHNEL	10s	35	0.6	33.5	2024-06-26	12:02:59	2024-12-31	11:02:59	2024:07:08	2024-07-08	07:21:16	1.92539	C019	Crossarchus platycephalus	2.5	-3	DF	1711.1	3936.84	Koto	3302.8	2024-07-08 07:21:16	2024-06-26 12:02:59	2024-12-31 11:02:59	1	675	0.097	33.028
C:\Users\user-1\Desktop\My_PHD\5_Redaction_These\Chap2_Metabarcoding & Census\Census\1_Data_Collection\Dossier2\C019\Crossarchus obscurus\07080043.JPG	07080043.JPG	404700	767950	BUSHNEL	10s	35	0.6	33.5	2024-06-26	12:02:59	2024-12-31	11:02:59	2024:07:08	2024-07-08	07:21:16	1.92539	C019	Crossarchus platycephalus	2.5	-3	DF	1711.1	3936.84	Koto	3302.8	2024-07-08 07:21:16	2024-06-26 12:02:59	2024-12-31 11:02:59	1	676	0.097	33.028
C:\Users\user-1\Desktop\My_PHD\5_Redaction_These\Chap2_Metabarcoding & Census\Census\1_Data_Collection\Dossier2\C019\Crossarchus obscurus\07080043.JPG	07080043.JPG	404700	767950	BUSHNEL	10s	35	0.6	33.5	2024-06-26	12:02:59	2024-12-31	11:02:59	2024:07:08	2024-07-08	07:21:16	1.92539	C019	Crossarchus platycephalus	2.5	-3	DF	1711.1	3936.84	Koto	3302.8	2024-07-08 07:21:16	2024-06-26 12:02:59	2024-12-31 11:02:59	1	677	0.097	33.028
C:\Users\user-1\Desktop\My_PHD\5_Redaction_These\Chap2_Metabarcoding & Census\Census\1_Data_Collection\Dossier2\C019\Crossarchus obscurus\07080043.JPG	07080043.JPG	404700	767950	BUSHNEL	10s	35	0.6	33.5	2024-06-26	12:02:59	2024-12-31	11:02:59	2024:07:08	2024-07-08	07:21:16	1.92539	C019	Crossarchus platycephalus	2.5	-3	DF	1711.1	3936.84	Koto	3302.8	2024-07-08 07:21:16	2024-06-26 12:02:59	2024-12-31 11:02:59	1	678	0.097	33.028
C:\Users\user-1\Desktop\My_PHD\5_Redaction_These\Chap2_Metabarcoding & Census\Census\1_Data_Collection\Dossier2\C019\Crossarchus obscurus\07080043.JPG	07080043.JPG	404700	767950	BUSHNEL	10s	35	0.6	33.5	2024-06-26	12:02:59	2024-12-31	11:02:59	2024:07:08	2024-07-08	07:21:16	1.92539	C019	Crossarchus platycephalus	2.5	-3	DF	1711.1	3936.84	Koto	3302.8	2024-07-08 07:21:16	2024-06-26 12:02:59	2024-12-31 11:02:59	1	679	0.097	33.028
C:\Users\user-1\Desktop\My_PHD\5_Redaction_These\Chap2_Metabarcoding & Census\Census\1_Data_Collection\Dossier2\C019\Crossarchus obscurus\07080043.JPG	07080043.JPG	404700	767950	BUSHNEL	10s	35	0.6	33.5	2024-06-26	12:02:59	2024-12-31	11:02:59	2024:07:08	2024-07-08	07:21:16	1.92539	C019	Crossarchus platycephalus	2.5	-3	DF	1711.1	3936.84	Koto	3302.8	2024-07-08 07:21:16	2024-06-26 12:02:59	2024-12-31 11:02:59	1	680	0.097	33.028
C:\Users\user-1\Desktop\My_PHD\5_Redaction_These\Chap2_Metabarcoding & Census\Census\1_Data_Collection\Dossier2\C019\Crossarchus obscurus\07080044.JPG	07080044.JPG	404700	767950	BUSHNEL	10s	35	0.6	33.5	2024-06-26	12:02:59	2024-12-31	11:02:59	2024:07:08	2024-07-08	07:21:17	1.92546	C019	Crossarchus platycephalus	2.5	-3	DF	1711.1	3936.84	Koto	3302.8	2024-07-08 07:21:17	2024-06-26 12:02:59	2024-12-31 11:02:59	1	681	0.097	33.028
C:\Users\user-1\Desktop\My_PHD\5_Redaction_These\Chap2_Metabarcoding & Census\Census\1_Data_Collection\Dossier2\C019\Crossarchus obscurus\07080044.JPG	07080044.JPG	404700	767950	BUSHNEL	10s	35	0.6	33.5	2024-06-26	12:02:59	2024-12-31	11:02:59	2024:07:08	2024-07-08	07:21:17	1.92546	C019	Crossarchus platycephalus	2.5	-3	DF	1711.1	3936.84	Koto	3302.8	2024-07-08 07:21:17	2024-06-26 12:02:59	2024-12-31 11:02:59	1	682	0.097	33.028
C:\Users\user-1\Desktop\My_PHD\5_Redaction_These\Chap2_Metabarcoding & Census\Census\1_Data_Collection\Dossier2\C019\Crossarchus obscurus\07080044.JPG	07080044.JPG	404700	767950	BUSHNEL	10s	35	0.6	33.5	2024-06-26	12:02:59	2024-12-31	11:02:59	2024:07:08	2024-07-08	07:21:17	1.92546	C019	Crossarchus platycephalus	2.5	-3	DF	1711.1	3936.84	Koto	3302.8	2024-07-08 07:21:17	2024-06-26 12:02:59	2024-12-31 11:02:59	1	683	0.097	33.028
C:\Users\user-1\Desktop\My_PHD\5_Redaction_These\Chap2_Metabarcoding & Census\Census\1_Data_Collection\Dossier2\C019\Crossarchus obscurus\07080044.JPG	07080044.JPG	404700	767950	BUSHNEL	10s	35	0.6	33.5	2024-06-26	12:02:59	2024-12-31	11:02:59	2024:07:08	2024-07-08	07:21:17	1.92546	C019	Crossarchus platycephalus	2.5	-3	DF	1711.1	3936.84	Koto	3302.8	2024-07-08 07:21:17	2024-06-26 12:02:59	2024-12-31 11:02:59	1	684	0.097	33.028
C:\Users\user-1\Desktop\My_PHD\5_Redaction_These\Chap2_Metabarcoding & Census\Census\1_Data_Collection\Dossier2\C019\Crossarchus obscurus\07080044.JPG	07080044.JPG	404700	767950	BUSHNEL	10s	35	0.6	33.5	2024-06-26	12:02:59	2024-12-31	11:02:59	2024:07:08	2024-07-08	07:21:17	1.92546	C019	Crossarchus platycephalus	2.5	-3	DF	1711.1	3936.84	Koto	3302.8	2024-07-08 07:21:17	2024-06-26 12:02:59	2024-12-31 11:02:59	1	685	0.097	33.028
C:\Users\user-1\Desktop\My_PHD\5_Redaction_These\Chap2_Metabarcoding & Census\Census\1_Data_Collection\Dossier2\C019\Crossarchus obscurus\07080044.JPG	07080044.JPG	404700	767950	BUSHNEL	10s	35	0.6	33.5	2024-06-26	12:02:59	2024-12-31	11:02:59	2024:07:08	2024-07-08	07:21:17	1.92546	C019	Crossarchus platycephalus	2.5	-3	DF	1711.1	3936.84	Koto	3302.8	2024-07-08 07:21:17	2024-06-26 12:02:59	2024-12-31 11:02:59	1	686	0.097	33.028
C:\Users\user-1\Desktop\My_PHD\5_Redaction_These\Chap2_Metabarcoding & Census\Census\1_Data_Collection\Dossier2\C019\Crossarchus obscurus\07080044.JPG	07080044.JPG	404700	767950	BUSHNEL	10s	35	0.6	33.5	2024-06-26	12:02:59	2024-12-31	11:02:59	2024:07:08	2024-07-08	07:21:17	1.92546	C019	Crossarchus platycephalus	2.5	-3	DF	1711.1	3936.84	Koto	3302.8	2024-07-08 07:21:17	2024-06-26 12:02:59	2024-12-31 11:02:59	1	687	0.097	33.028
C:\Users\user-1\Desktop\My_PHD\5_Redaction_These\Chap2_Metabarcoding & Census\Census\1_Data_Collection\Dossier2\C019\Crossarchus obscurus\07080045.JPG	07080045.JPG	404700	767950	BUSHNEL	10s	35	0.6	33.5	2024-06-26	12:02:59	2024-12-31	11:02:59	2024:07:08	2024-07-08	07:22:07	1.9291	C019	Crossarchus platycephalus	2	2	DF	1711.1	3936.84	Koto	3302.8	2024-07-08 07:22:07	2024-06-26 12:02:59	2024-12-31 11:02:59	1	688	0.097	33.028
C:\Users\user-1\Desktop\My_PHD\5_Redaction_These\Chap2_Metabarcoding & Census\Census\1_Data_Collection\Dossier2\C019\Crossarchus obscurus\07080045.JPG	07080045.JPG	404700	767950	BUSHNEL	10s	35	0.6	33.5	2024-06-26	12:02:59	2024-12-31	11:02:59	2024:07:08	2024-07-08	07:22:07	1.9291	C019	Crossarchus platycephalus	2	2	DF	1711.1	3936.84	Koto	3302.8	2024-07-08 07:22:07	2024-06-26 12:02:59	2024-12-31 11:02:59	1	689	0.097	33.028
C:\Users\user-1\Desktop\My_PHD\5_Redaction_These\Chap2_Metabarcoding & Census\Census\1_Data_Collection\Dossier2\C019\Crossarchus obscurus\07080045.JPG	07080045.JPG	404700	767950	BUSHNEL	10s	35	0.6	33.5	2024-06-26	12:02:59	2024-12-31	11:02:59	2024:07:08	2024-07-08	07:22:07	1.9291	C019	Crossarchus platycephalus	2	2	DF	1711.1	3936.84	Koto	3302.8	2024-07-08 07:22:07	2024-06-26 12:02:59	2024-12-31 11:02:59	1	690	0.097	33.028
C:\Users\user-1\Desktop\My_PHD\5_Redaction_These\Chap2_Metabarcoding & Census\Census\1_Data_Collection\Dossier2\C019\Crossarchus obscurus\07080045.JPG	07080045.JPG	404700	767950	BUSHNEL	10s	35	0.6	33.5	2024-06-26	12:02:59	2024-12-31	11:02:59	2024:07:08	2024-07-08	07:22:07	1.9291	C019	Crossarchus platycephalus	2	2	DF	1711.1	3936.84	Koto	3302.8	2024-07-08 07:22:07	2024-06-26 12:02:59	2024-12-31 11:02:59	1	691	0.097	33.028
C:\Users\user-1\Desktop\My_PHD\5_Redaction_These\Chap2_Metabarcoding & Census\Census\1_Data_Collection\Dossier2\C019\Crossarchus obscurus\07080045.JPG	07080045.JPG	404700	767950	BUSHNEL	10s	35	0.6	33.5	2024-06-26	12:02:59	2024-12-31	11:02:59	2024:07:08	2024-07-08	07:22:07	1.9291	C019	Crossarchus platycephalus	2	2	DF	1711.1	3936.84	Koto	3302.8	2024-07-08 07:22:07	2024-06-26 12:02:59	2024-12-31 11:02:59	1	692	0.097	33.028
C:\Users\user-1\Desktop\My_PHD\5_Redaction_These\Chap2_Metabarcoding & Census\Census\1_Data_Collection\Dossier2\C019\Crossarchus obscurus\07080045.JPG	07080045.JPG	404700	767950	BUSHNEL	10s	35	0.6	33.5	2024-06-26	12:02:59	2024-12-31	11:02:59	2024:07:08	2024-07-08	07:22:07	1.9291	C019	Crossarchus platycephalus	2	2	DF	1711.1	3936.84	Koto	3302.8	2024-07-08 07:22:07	2024-06-26 12:02:59	2024-12-31 11:02:59	1	693	0.097	33.028
C:\Users\user-1\Desktop\My_PHD\5_Redaction_These\Chap2_Metabarcoding & Census\Census\1_Data_Collection\Dossier2\C019\Crossarchus obscurus\07080045.JPG	07080045.JPG	404700	767950	BUSHNEL	10s	35	0.6	33.5	2024-06-26	12:02:59	2024-12-31	11:02:59	2024:07:08	2024-07-08	07:22:07	1.9291	C019	Crossarchus platycephalus	2	2	DF	1711.1	3936.84	Koto	3302.8	2024-07-08 07:22:07	2024-06-26 12:02:59	2024-12-31 11:02:59	1	694	0.097	33.028
C:\Users\user-1\Desktop\My_PHD\5_Redaction_These\Chap2_Metabarcoding & Census\Census\1_Data_Collection\Dossier2\C019\Crossarchus obscurus\07080046.JPG	07080046.JPG	404700	767950	BUSHNEL	10s	35	0.6	33.5	2024-06-26	12:02:59	2024-12-31	11:02:59	2024:07:08	2024-07-08	07:22:08	1.92917	C019	Crossarchus platycephalus	2	3	DF	1711.1	3936.84	Koto	3302.8	2024-07-08 07:22:08	2024-06-26 12:02:59	2024-12-31 11:02:59	1	695	0.097	33.028
C:\Users\user-1\Desktop\My_PHD\5_Redaction_These\Chap2_Metabarcoding & Census\Census\1_Data_Collection\Dossier2\C019\Crossarchus obscurus\07080046.JPG	07080046.JPG	404700	767950	BUSHNEL	10s	35	0.6	33.5	2024-06-26	12:02:59	2024-12-31	11:02:59	2024:07:08	2024-07-08	07:22:08	1.92917	C019	Crossarchus platycephalus	2	3	DF	1711.1	3936.84	Koto	3302.8	2024-07-08 07:22:08	2024-06-26 12:02:59	2024-12-31 11:02:59	1	696	0.097	33.028
C:\Users\user-1\Desktop\My_PHD\5_Redaction_These\Chap2_Metabarcoding & Census\Census\1_Data_Collection\Dossier2\C019\Crossarchus obscurus\07080046.JPG	07080046.JPG	404700	767950	BUSHNEL	10s	35	0.6	33.5	2024-06-26	12:02:59	2024-12-31	11:02:59	2024:07:08	2024-07-08	07:22:08	1.92917	C019	Crossarchus platycephalus	2	3	DF	1711.1	3936.84	Koto	3302.8	2024-07-08 07:22:08	2024-06-26 12:02:59	2024-12-31 11:02:59	1	697	0.097	33.028
C:\Users\user-1\Desktop\My_PHD\5_Redaction_These\Chap2_Metabarcoding & Census\Census\1_Data_Collection\Dossier2\C019\Crossarchus obscurus\07080046.JPG	07080046.JPG	404700	767950	BUSHNEL	10s	35	0.6	33.5	2024-06-26	12:02:59	2024-12-31	11:02:59	2024:07:08	2024-07-08	07:22:08	1.92917	C019	Crossarchus platycephalus	2	3	DF	1711.1	3936.84	Koto	3302.8	2024-07-08 07:22:08	2024-06-26 12:02:59	2024-12-31 11:02:59	1	698	0.097	33.028
C:\Users\user-1\Desktop\My_PHD\5_Redaction_These\Chap2_Metabarcoding & Census\Census\1_Data_Collection\Dossier2\C019\Crossarchus obscurus\07080046.JPG	07080046.JPG	404700	767950	BUSHNEL	10s	35	0.6	33.5	2024-06-26	12:02:59	2024-12-31	11:02:59	2024:07:08	2024-07-08	07:22:08	1.92917	C019	Crossarchus platycephalus	2	3	DF	1711.1	3936.84	Koto	3302.8	2024-07-08 07:22:08	2024-06-26 12:02:59	2024-12-31 11:02:59	1	699	0.097	33.028
C:\Users\user-1\Desktop\My_PHD\5_Redaction_These\Chap2_Metabarcoding & Census\Census\1_Data_Collection\Dossier2\C019\Crossarchus obscurus\07080046.JPG	07080046.JPG	404700	767950	BUSHNEL	10s	35	0.6	33.5	2024-06-26	12:02:59	2024-12-31	11:02:59	2024:07:08	2024-07-08	07:22:08	1.92917	C019	Crossarchus platycephalus	2	3	DF	1711.1	3936.84	Koto	3302.8	2024-07-08 07:22:08	2024-06-26 12:02:59	2024-12-31 11:02:59	1	700	0.097	33.028
C:\Users\user-1\Desktop\My_PHD\5_Redaction_These\Chap2_Metabarcoding & Census\Census\1_Data_Collection\Dossier2\C019\Crossarchus obscurus\07080046.JPG	07080046.JPG	404700	767950	BUSHNEL	10s	35	0.6	33.5	2024-06-26	12:02:59	2024-12-31	11:02:59	2024:07:08	2024-07-08	07:22:08	1.92917	C019	Crossarchus platycephalus	2	3	DF	1711.1	3936.84	Koto	3302.8	2024-07-08 07:22:08	2024-06-26 12:02:59	2024-12-31 11:02:59	1	701	0.097	33.028
C:\Users\user-1\Desktop\My_PHD\5_Redaction_These\Chap2_Metabarcoding & Census\Census\1_Data_Collection\Dossier2\C019\Crossarchus obscurus\07080047.JPG	07080047.JPG	404700	767950	BUSHNEL	10s	35	0.6	33.5	2024-06-26	12:02:59	2024-12-31	11:02:59	2024:07:08	2024-07-08	07:24:26	1.93921	C019	Crossarchus platycephalus	2	-17.5	DF	1711.1	3936.84	Koto	3302.8	2024-07-08 07:24:26	2024-06-26 12:02:59	2024-12-31 11:02:59	1	702	0.097	33.028
C:\Users\user-1\Desktop\My_PHD\5_Redaction_These\Chap2_Metabarcoding & Census\Census\1_Data_Collection\Dossier2\C019\Crossarchus obscurus\07080047.JPG	07080047.JPG	404700	767950	BUSHNEL	10s	35	0.6	33.5	2024-06-26	12:02:59	2024-12-31	11:02:59	2024:07:08	2024-07-08	07:24:26	1.93921	C019	Crossarchus platycephalus	2	-17.5	DF	1711.1	3936.84	Koto	3302.8	2024-07-08 07:24:26	2024-06-26 12:02:59	2024-12-31 11:02:59	1	703	0.097	33.028
C:\Users\user-1\Desktop\My_PHD\5_Redaction_These\Chap2_Metabarcoding & Census\Census\1_Data_Collection\Dossier2\C019\Crossarchus obscurus\07080047.JPG	07080047.JPG	404700	767950	BUSHNEL	10s	35	0.6	33.5	2024-06-26	12:02:59	2024-12-31	11:02:59	2024:07:08	2024-07-08	07:24:26	1.93921	C019	Crossarchus platycephalus	2	-17.5	DF	1711.1	3936.84	Koto	3302.8	2024-07-08 07:24:26	2024-06-26 12:02:59	2024-12-31 11:02:59	1	704	0.097	33.028
C:\Users\user-1\Desktop\My_PHD\5_Redaction_These\Chap2_Metabarcoding & Census\Census\1_Data_Collection\Dossier2\C019\Crossarchus obscurus\07080047.JPG	07080047.JPG	404700	767950	BUSHNEL	10s	35	0.6	33.5	2024-06-26	12:02:59	2024-12-31	11:02:59	2024:07:08	2024-07-08	07:24:26	1.93921	C019	Crossarchus platycephalus	2	-17.5	DF	1711.1	3936.84	Koto	3302.8	2024-07-08 07:24:26	2024-06-26 12:02:59	2024-12-31 11:02:59	1	705	0.097	33.028
C:\Users\user-1\Desktop\My_PHD\5_Redaction_These\Chap2_Metabarcoding & Census\Census\1_Data_Collection\Dossier2\C019\Crossarchus obscurus\07080047.JPG	07080047.JPG	404700	767950	BUSHNEL	10s	35	0.6	33.5	2024-06-26	12:02:59	2024-12-31	11:02:59	2024:07:08	2024-07-08	07:24:26	1.93921	C019	Crossarchus platycephalus	2	-17.5	DF	1711.1	3936.84	Koto	3302.8	2024-07-08 07:24:26	2024-06-26 12:02:59	2024-12-31 11:02:59	1	706	0.097	33.028
C:\Users\user-1\Desktop\My_PHD\5_Redaction_These\Chap2_Metabarcoding & Census\Census\1_Data_Collection\Dossier2\C019\Crossarchus obscurus\07080048.JPG	07080048.JPG	404700	767950	BUSHNEL	10s	35	0.6	33.5	2024-06-26	12:02:59	2024-12-31	11:02:59	2024:07:08	2024-07-08	07:24:26	1.93921	C019	Crossarchus platycephalus	2	-17.5	DF	1711.1	3936.84	Koto	3302.8	2024-07-08 07:24:26	2024-06-26 12:02:59	2024-12-31 11:02:59	1	707	0.097	33.028
C:\Users\user-1\Desktop\My_PHD\5_Redaction_These\Chap2_Metabarcoding & Census\Census\1_Data_Collection\Dossier2\C019\Ratus sp\07080039.JPG	07080039.JPG	404700	767950	BUSHNEL	10s	35	0.6	33.5	2024-06-26	12:02:59	2024-12-31	11:02:59	2024:07:08	2024-07-08	03:15:50	0.854484	C019	Praomys sp.	2	-17.5	DF	1711.1	3936.84	Koto	3302.8	2024-07-08 03:15:50	2024-06-26 12:02:59	2024-12-31 11:02:59	1	708	0.097	33.028
C:\Users\user-1\Desktop\My_PHD\5_Redaction_These\Chap2_Metabarcoding & Census\Census\1_Data_Collection\Dossier2\C019\Ratus sp\07080040.JPG	07080040.JPG	404700	767950	BUSHNEL	10s	35	0.6	33.5	2024-06-26	12:02:59	2024-12-31	11:02:59	2024:07:08	2024-07-08	03:15:50	0.854484	C019	Praomys sp.	2	-17.5	DF	1711.1	3936.84	Koto	3302.8	2024-07-08 03:15:50	2024-06-26 12:02:59	2024-12-31 11:02:59	1	709	0.097	33.028
C:\Users\user-1\Desktop\My_PHD\5_Redaction_These\Chap2_Metabarcoding & Census\Census\1_Data_Collection\Dossier1\C008\Chlorocebus tantalus\DSCF0001.JPG	DSCF0001.JPG	401737	767066	GardePro	10s	120	0.6	30	2024-07-06	11:12:00	2024-12-31	10:12:00	2024:07:09	2024-07-09	14:00:21	3.667	C008	Chlorocebus tantalus	3	0	CF	742.549	4630.77	Koto	1050.91	2024-07-09 14:00:21	2024-07-06 11:12:00	2024-12-31 10:12:00	1	710	0.333	10.5091
C:\Users\user-1\Desktop\My_PHD\5_Redaction_These\Chap2_Metabarcoding & Census\Census\1_Data_Collection\Dossier1\C008\Chlorocebus tantalus\DSCF0002.JPG	DSCF0002.JPG	401737	767066	GardePro	10s	120	0.6	30	2024-07-06	11:12:00	2024-12-31	10:12:00	2024:07:09	2024-07-09	14:00:21	3.667	C008	Chlorocebus tantalus	2.5	-20	CF	742.549	4630.77	Koto	1050.91	2024-07-09 14:00:21	2024-07-06 11:12:00	2024-12-31 10:12:00	1	711	0.333	10.5091
C:\Users\user-1\Desktop\My_PHD\5_Redaction_These\Chap2_Metabarcoding & Census\Census\1_Data_Collection\Dossier1\C010\Crossarchus obscurus\DSCF0013.JPG	DSCF0013.JPG	403182	767030	GardePro	10s	120	0.6	30	2024-07-06	13:45:47	2024-12-31	12:45:47	2024:07:09	2024-07-09	8:36:09	2.252	C010	Crossarchus platycephalus	6	15	CF	1423.16	4559.62	Koto	1050.91	2024-07-09 8:36:09	2024-07-06 13:45:47	2024-12-31 12:45:47	1	712	0.333	10.5091
C:\Users\user-1\Desktop\My_PHD\5_Redaction_These\Chap2_Metabarcoding & Census\Census\1_Data_Collection\Dossier1\C010\Crossarchus obscurus\DSCF0014.JPG	DSCF0014.JPG	403182	767030	GardePro	10s	120	0.6	30	2024-07-06	13:45:47	2024-12-31	12:45:47	2024:07:09	2024-07-09	8:36:09	2.252	C010	Crossarchus platycephalus	5.5	-5	CF	1423.16	4559.62	Koto	1050.91	2024-07-09 8:36:09	2024-07-06 13:45:47	2024-12-31 12:45:47	1	713	0.333	10.5091
C:\Users\user-1\Desktop\My_PHD\5_Redaction_These\Chap2_Metabarcoding & Census\Census\1_Data_Collection\Dossier1\C010\Crossarchus obscurus\DSCF0015.JPG	DSCF0015.JPG	403182	767030	GardePro	10s	120	0.6	30	2024-07-06	13:45:47	2024-12-31	12:45:47	2024:07:09	2024-07-09	8:36:21	2.253	C010	Crossarchus platycephalus	5	35	CF	1423.16	4559.62	Koto	1050.91	2024-07-09 8:36:21	2024-07-06 13:45:47	2024-12-31 12:45:47	1	714	0.333	10.5091
C:\Users\user-1\Desktop\My_PHD\5_Redaction_These\Chap2_Metabarcoding & Census\Census\1_Data_Collection\Dossier1\C010\Crossarchus obscurus\DSCF0016.JPG	DSCF0016.JPG	403182	767030	GardePro	10s	120	0.6	30	2024-07-06	13:45:47	2024-12-31	12:45:47	2024:07:09	2024-07-09	8:36:22	2.253	C010	Crossarchus platycephalus	5	37	CF	1423.16	4559.62	Koto	1050.91	2024-07-09 8:36:22	2024-07-06 13:45:47	2024-12-31 12:45:47	1	715	0.333	10.5091
C:\Users\user-1\Desktop\My_PHD\5_Redaction_These\Chap2_Metabarcoding & Census\Census\1_Data_Collection\Dossier1\C010\Genetta genetta\DSCF0017.JPG	DSCF0017.JPG	403182	767030	GardePro	10s	120	0.6	30	2024-07-06	13:45:47	2024-12-31	12:45:47	2024:07:09	2024-07-09	21:55:27	5.74	C010	Genetta pardina/maculata	4.3	-35	CF	1423.16	4559.62	Koto	1050.91	2024-07-09 21:55:27	2024-07-06 13:45:47	2024-12-31 12:45:47	1	716	0.333	10.5091
C:\Users\user-1\Desktop\My_PHD\5_Redaction_These\Chap2_Metabarcoding & Census\Census\1_Data_Collection\Dossier1\C010\Genetta genetta\DSCF0018.JPG	DSCF0018.JPG	403182	767030	GardePro	10s	120	0.6	30	2024-07-06	13:45:47	2024-12-31	12:45:47	2024:07:09	2024-07-09	21:55:28	5.74	C010	Genetta pardina/maculata	4.3	-35	CF	1423.16	4559.62	Koto	1050.91	2024-07-09 21:55:28	2024-07-06 13:45:47	2024-12-31 12:45:47	1	717	0.333	10.5091
C:\Users\user-1\Desktop\My_PHD\5_Redaction_These\Chap2_Metabarcoding & Census\Census\1_Data_Collection\Dossier1\C010\Genetta genetta\DSCF0019.JPG	DSCF0019.JPG	403182	767030	GardePro	10s	120	0.6	30	2024-07-06	13:45:47	2024-12-31	12:45:47	2024:07:09	2024-07-09	21:55:32	5.74	C010	Genetta pardina/maculata	4.3	-20	CF	1423.16	4559.62	Koto	1050.91	2024-07-09 21:55:32	2024-07-06 13:45:47	2024-12-31 12:45:47	1	718	0.333	10.5091
C:\Users\user-1\Desktop\My_PHD\5_Redaction_These\Chap2_Metabarcoding & Census\Census\1_Data_Collection\Dossier1\C010\Genetta genetta\DSCF0020.JPG	DSCF0020.JPG	403182	767030	GardePro	10s	120	0.6	30	2024-07-06	13:45:47	2024-12-31	12:45:47	2024:07:09	2024-07-09	21:55:33	5.74	C010	Genetta pardina/maculata	4.3	-20	CF	1423.16	4559.62	Koto	1050.91	2024-07-09 21:55:33	2024-07-06 13:45:47	2024-12-31 12:45:47	1	719	0.333	10.5091
C:\Users\user-1\Desktop\My_PHD\5_Redaction_These\Chap2_Metabarcoding & Census\Census\1_Data_Collection\Dossier1\C010\Genetta genetta\DSCF0021.JPG	DSCF0021.JPG	403182	767030	GardePro	10s	120	0.6	30	2024-07-06	13:45:47	2024-12-31	12:45:47	2024:07:09	2024-07-09	21:55:39	5.741	C010	Genetta pardina/maculata	3	-5	CF	1423.16	4559.62	Koto	1050.91	2024-07-09 21:55:39	2024-07-06 13:45:47	2024-12-31 12:45:47	1	720	0.333	10.5091
C:\Users\user-1\Desktop\My_PHD\5_Redaction_These\Chap2_Metabarcoding & Census\Census\1_Data_Collection\Dossier1\C010\Genetta genetta\DSCF0022.JPG	DSCF0022.JPG	403182	767030	GardePro	10s	120	0.6	30	2024-07-06	13:45:47	2024-12-31	12:45:47	2024:07:09	2024-07-09	21:55:40	5.741	C010	Genetta pardina/maculata	3	-5	CF	1423.16	4559.62	Koto	1050.91	2024-07-09 21:55:40	2024-07-06 13:45:47	2024-12-31 12:45:47	1	721	0.333	10.5091
C:\Users\user-1\Desktop\My_PHD\5_Redaction_These\Chap2_Metabarcoding & Census\Census\1_Data_Collection\Dossier1\C011\Thryonomys swinderianus\DSCF0011.JPG	DSCF0011.JPG	404911	766437	GardePro	10s	120	0.6	30	2024-07-06	15:27:57	2024-12-31	14:27:57	2024:07:09	2024-07-09	19:36:50	5.135	C011	Potamochoerus porcus	4	-30	CF	736.954	4843.88	Koto	1050.91	2024-07-09 19:36:50	2024-07-06 15:27:57	2024-12-31 14:27:57	1	722	0.333	10.5091
C:\Users\user-1\Desktop\My_PHD\5_Redaction_These\Chap2_Metabarcoding & Census\Census\1_Data_Collection\Dossier1\C011\Thryonomys swinderianus\DSCF0012.JPG	DSCF0012.JPG	404911	766437	GardePro	10s	120	0.6	30	2024-07-06	15:27:57	2024-12-31	14:27:57	2024:07:09	2024-07-09	19:36:50	5.135	C011	Potamochoerus porcus	4	-30	CF	736.954	4843.88	Koto	1050.91	2024-07-09 19:36:50	2024-07-06 15:27:57	2024-12-31 14:27:57	1	723	0.333	10.5091
C:\Users\user-1\Desktop\My_PHD\5_Redaction_These\Chap2_Metabarcoding & Census\Census\1_Data_Collection\Dossier1\C011\Thryonomys swinderianus\DSCF0013.JPG	DSCF0013.JPG	404911	766437	GardePro	10s	120	0.6	30	2024-07-06	15:27:57	2024-12-31	14:27:57	2024:07:09	2024-07-09	19:38:22	5.142	C011	Potamochoerus porcus	4.5	-10	CF	736.954	4843.88	Koto	1050.91	2024-07-09 19:38:22	2024-07-06 15:27:57	2024-12-31 14:27:57	1	724	0.333	10.5091
C:\Users\user-1\Desktop\My_PHD\5_Redaction_These\Chap2_Metabarcoding & Census\Census\1_Data_Collection\Dossier1\C011\Thryonomys swinderianus\DSCF0014.JPG	DSCF0014.JPG	404911	766437	GardePro	10s	120	0.6	30	2024-07-06	15:27:57	2024-12-31	14:27:57	2024:07:09	2024-07-09	19:38:22	5.142	C011	Potamochoerus porcus	4	-18	CF	736.954	4843.88	Koto	1050.91	2024-07-09 19:38:22	2024-07-06 15:27:57	2024-12-31 14:27:57	1	725	0.333	10.5091
C:\Users\user-1\Desktop\My_PHD\5_Redaction_These\Chap2_Metabarcoding & Census\Census\1_Data_Collection\Dossier1\C011\Thryonomys swinderianus\DSCF0015.JPG	DSCF0015.JPG	404911	766437	GardePro	10s	120	0.6	30	2024-07-06	15:27:57	2024-12-31	14:27:57	2024:07:09	2024-07-09	19:38:28	5.142	C011	Potamochoerus porcus	4	0	CF	736.954	4843.88	Koto	1050.91	2024-07-09 19:38:28	2024-07-06 15:27:57	2024-12-31 14:27:57	1	726	0.333	10.5091
C:\Users\user-1\Desktop\My_PHD\5_Redaction_These\Chap2_Metabarcoding & Census\Census\1_Data_Collection\Dossier1\C011\Thryonomys swinderianus\DSCF0016.JPG	DSCF0016.JPG	404911	766437	GardePro	10s	120	0.6	30	2024-07-06	15:27:57	2024-12-31	14:27:57	2024:07:09	2024-07-09	19:38:28	5.142	C011	Potamochoerus porcus	4	3	CF	736.954	4843.88	Koto	1050.91	2024-07-09 19:38:28	2024-07-06 15:27:57	2024-12-31 14:27:57	1	727	0.333	10.5091
C:\Users\user-1\Desktop\My_PHD\5_Redaction_These\Chap2_Metabarcoding & Census\Census\1_Data_Collection\Dossier1\C011\Thryonomys swinderianus\DSCF0017.JPG	DSCF0017.JPG	404911	766437	GardePro	10s	120	0.6	30	2024-07-06	15:27:57	2024-12-31	14:27:57	2024:07:09	2024-07-09	19:38:36	5.143	C011	Potamochoerus porcus	4	3	CF	736.954	4843.88	Koto	1050.91	2024-07-09 19:38:36	2024-07-06 15:27:57	2024-12-31 14:27:57	1	728	0.333	10.5091
C:\Users\user-1\Desktop\My_PHD\5_Redaction_These\Chap2_Metabarcoding & Census\Census\1_Data_Collection\Dossier1\C011\Thryonomys swinderianus\DSCF0018.JPG	DSCF0018.JPG	404911	766437	GardePro	10s	120	0.6	30	2024-07-06	15:27:57	2024-12-31	14:27:57	2024:07:09	2024-07-09	19:38:36	5.143	C011	Potamochoerus porcus	4	5	CF	736.954	4843.88	Koto	1050.91	2024-07-09 19:38:36	2024-07-06 15:27:57	2024-12-31 14:27:57	1	729	0.333	10.5091
C:\Users\user-1\Desktop\My_PHD\5_Redaction_These\Chap2_Metabarcoding & Census\Census\1_Data_Collection\Dossier1\C011\Thryonomys swinderianus\DSCF0019.JPG	DSCF0019.JPG	404911	766437	GardePro	10s	120	0.6	30	2024-07-06	15:27:57	2024-12-31	14:27:57	2024:07:09	2024-07-09	19:38:41	5.143	C011	Potamochoerus porcus	4.5	20	CF	736.954	4843.88	Koto	1050.91	2024-07-09 19:38:41	2024-07-06 15:27:57	2024-12-31 14:27:57	1	730	0.333	10.5091
C:\Users\user-1\Desktop\My_PHD\5_Redaction_These\Chap2_Metabarcoding & Census\Census\1_Data_Collection\Dossier1\C011\Thryonomys swinderianus\DSCF0020.JPG	DSCF0020.JPG	404911	766437	GardePro	10s	120	0.6	30	2024-07-06	15:27:57	2024-12-31	14:27:57	2024:07:09	2024-07-09	19:38:41	5.143	C011	Potamochoerus porcus	4.5	20	CF	736.954	4843.88	Koto	1050.91	2024-07-09 19:38:41	2024-07-06 15:27:57	2024-12-31 14:27:57	1	731	0.333	10.5091
C:\Users\user-1\Desktop\My_PHD\5_Redaction_These\Chap2_Metabarcoding & Census\Census\1_Data_Collection\Dossier1\C011\Thryonomys swinderianus\DSCF0021.JPG	DSCF0021.JPG	404911	766437	GardePro	10s	120	0.6	30	2024-07-06	15:27:57	2024-12-31	14:27:57	2024:07:09	2024-07-09	19:38:52	5.144	C011	Potamochoerus porcus	4.5	30	CF	736.954	4843.88	Koto	1050.91	2024-07-09 19:38:52	2024-07-06 15:27:57	2024-12-31 14:27:57	1	732	0.333	10.5091
C:\Users\user-1\Desktop\My_PHD\5_Redaction_These\Chap2_Metabarcoding & Census\Census\1_Data_Collection\Dossier1\C011\Thryonomys swinderianus\DSCF0022.JPG	DSCF0022.JPG	404911	766437	GardePro	10s	120	0.6	30	2024-07-06	15:27:57	2024-12-31	14:27:57	2024:07:09	2024-07-09	19:38:52	5.144	C011	Potamochoerus porcus	4.5	30	CF	736.954	4843.88	Koto	1050.91	2024-07-09 19:38:52	2024-07-06 15:27:57	2024-12-31 14:27:57	1	733	0.333	10.5091
C:\Users\user-1\Desktop\My_PHD\5_Redaction_These\Chap2_Metabarcoding & Census\Census\1_Data_Collection\Dossier1\C011\Thryonomys swinderianus\DSCF0023.JPG	DSCF0023.JPG	404911	766437	GardePro	10s	120	0.6	30	2024-07-06	15:27:57	2024-12-31	14:27:57	2024:07:09	2024-07-09	19:38:56	5.144	C011	Potamochoerus porcus	4	10	CF	736.954	4843.88	Koto	1050.91	2024-07-09 19:38:56	2024-07-06 15:27:57	2024-12-31 14:27:57	1	734	0.333	10.5091
C:\Users\user-1\Desktop\My_PHD\5_Redaction_These\Chap2_Metabarcoding & Census\Census\1_Data_Collection\Dossier1\C011\Thryonomys swinderianus\DSCF0024.JPG	DSCF0024.JPG	404911	766437	GardePro	10s	120	0.6	30	2024-07-06	15:27:57	2024-12-31	14:27:57	2024:07:09	2024-07-09	19:38:57	5.144	C011	Potamochoerus porcus	4	5	CF	736.954	4843.88	Koto	1050.91	2024-07-09 19:38:57	2024-07-06 15:27:57	2024-12-31 14:27:57	1	735	0.333	10.5091
C:\Users\user-1\Desktop\My_PHD\5_Redaction_These\Chap2_Metabarcoding & Census\Census\1_Data_Collection\Dossier1\C011\Thryonomys swinderianus\DSCF0025.JPG	DSCF0025.JPG	404911	766437	GardePro	10s	120	0.6	30	2024-07-06	15:27:57	2024-12-31	14:27:57	2024:07:09	2024-07-09	19:39:02	5.145	C011	Potamochoerus porcus	3.5	-20	CF	736.954	4843.88	Koto	1050.91	2024-07-09 19:39:02	2024-07-06 15:27:57	2024-12-31 14:27:57	1	736	0.333	10.5091
C:\Users\user-1\Desktop\My_PHD\5_Redaction_These\Chap2_Metabarcoding & Census\Census\1_Data_Collection\Dossier1\C011\Thryonomys swinderianus\DSCF0026.JPG	DSCF0026.JPG	404911	766437	GardePro	10s	120	0.6	30	2024-07-06	15:27:57	2024-12-31	14:27:57	2024:07:09	2024-07-09	19:39:03	5.145	C011	Potamochoerus porcus	3.5	-20	CF	736.954	4843.88	Koto	1050.91	2024-07-09 19:39:03	2024-07-06 15:27:57	2024-12-31 14:27:57	1	737	0.333	10.5091
C:\Users\user-1\Desktop\My_PHD\5_Redaction_These\Chap2_Metabarcoding & Census\Census\1_Data_Collection\Dossier1\C011\Thryonomys swinderianus\DSCF0027.JPG	DSCF0027.JPG	404911	766437	GardePro	10s	120	0.6	30	2024-07-06	15:27:57	2024-12-31	14:27:57	2024:07:09	2024-07-09	19:39:07	5.145	C011	Potamochoerus porcus	3.5	-25	CF	736.954	4843.88	Koto	1050.91	2024-07-09 19:39:07	2024-07-06 15:27:57	2024-12-31 14:27:57	1	738	0.333	10.5091
C:\Users\user-1\Desktop\My_PHD\5_Redaction_These\Chap2_Metabarcoding & Census\Census\1_Data_Collection\Dossier1\C011\Thryonomys swinderianus\DSCF0028.JPG	DSCF0028.JPG	404911	766437	GardePro	10s	120	0.6	30	2024-07-06	15:27:57	2024-12-31	14:27:57	2024:07:09	2024-07-09	19:39:08	5.145	C011	Potamochoerus porcus	3.5	-25	CF	736.954	4843.88	Koto	1050.91	2024-07-09 19:39:08	2024-07-06 15:27:57	2024-12-31 14:27:57	1	739	0.333	10.5091
C:\Users\user-1\Desktop\My_PHD\5_Redaction_These\Chap2_Metabarcoding & Census\Census\1_Data_Collection\Dossier1\C011\Thryonomys swinderianus\DSCF0029.JPG	DSCF0029.JPG	404911	766437	GardePro	10s	120	0.6	30	2024-07-06	15:27:57	2024-12-31	14:27:57	2024:07:09	2024-07-09	19:39:20	5.146	C011	Potamochoerus porcus	3.5	-20	CF	736.954	4843.88	Koto	1050.91	2024-07-09 19:39:20	2024-07-06 15:27:57	2024-12-31 14:27:57	1	740	0.333	10.5091
C:\Users\user-1\Desktop\My_PHD\5_Redaction_These\Chap2_Metabarcoding & Census\Census\1_Data_Collection\Dossier1\C011\Thryonomys swinderianus\DSCF0030.JPG	DSCF0030.JPG	404911	766437	GardePro	10s	120	0.6	30	2024-07-06	15:27:57	2024-12-31	14:27:57	2024:07:09	2024-07-09	19:39:21	5.146	C011	Potamochoerus porcus	3.5	-20	CF	736.954	4843.88	Koto	1050.91	2024-07-09 19:39:21	2024-07-06 15:27:57	2024-12-31 14:27:57	1	741	0.333	10.5091
C:\Users\user-1\Desktop\My_PHD\5_Redaction_These\Chap2_Metabarcoding & Census\Census\1_Data_Collection\Dossier1\C011\Thryonomys swinderianus\DSCF0031.JPG	DSCF0031.JPG	404911	766437	GardePro	10s	120	0.6	30	2024-07-06	15:27:57	2024-12-31	14:27:57	2024:07:09	2024-07-09	19:39:25	5.146	C011	Potamochoerus porcus	4	28	CF	736.954	4843.88	Koto	1050.91	2024-07-09 19:39:25	2024-07-06 15:27:57	2024-12-31 14:27:57	1	742	0.333	10.5091
C:\Users\user-1\Desktop\My_PHD\5_Redaction_These\Chap2_Metabarcoding & Census\Census\1_Data_Collection\Dossier1\C011\Thryonomys swinderianus\DSCF0032.JPG	DSCF0032.JPG	404911	766437	GardePro	10s	120	0.6	30	2024-07-06	15:27:57	2024-12-31	14:27:57	2024:07:09	2024-07-09	19:39:26	5.146	C011	Potamochoerus porcus	4	28	CF	736.954	4843.88	Koto	1050.91	2024-07-09 19:39:26	2024-07-06 15:27:57	2024-12-31 14:27:57	1	743	0.333	10.5091
C:\Users\user-1\Desktop\My_PHD\5_Redaction_These\Chap2_Metabarcoding & Census\Census\1_Data_Collection\Dossier2\C016\Philantomba walteri\DSCF0013.JPG	DSCF0013.JPG	401717	767985	GardePro	10s	120	0.6	30	2024-06-26	16:23:40	2024-12-31	15:23:40	2024:07:09	2024-07-09	7:24:01	1.937	C016	Philantomba walteri	4	-10	DF	1338.45	3671.46	Koto	3302.8	2024-07-09 7:24:01	2024-06-26 16:23:40	2024-12-31 15:23:40	1	744	0.333	33.028
C:\Users\user-1\Desktop\My_PHD\5_Redaction_These\Chap2_Metabarcoding & Census\Census\1_Data_Collection\Dossier2\C016\Philantomba walteri\DSCF0014.JPG	DSCF0014.JPG	401717	767985	GardePro	10s	120	0.6	30	2024-06-26	16:23:40	2024-12-31	15:23:40	2024:07:09	2024-07-09	7:24:01	1.937	C016	Philantomba walteri	4	-10	DF	1338.45	3671.46	Koto	3302.8	2024-07-09 7:24:01	2024-06-26 16:23:40	2024-12-31 15:23:40	1	745	0.333	33.028
C:\Users\user-1\Desktop\My_PHD\5_Redaction_These\Chap2_Metabarcoding & Census\Census\1_Data_Collection\Dossier2\C016\Philantomba walteri\DSCF0015.JPG	DSCF0015.JPG	401717	767985	GardePro	10s	120	0.6	30	2024-06-26	16:23:40	2024-12-31	15:23:40	2024:07:09	2024-07-09	7:24:05	1.938	C016	Philantomba walteri	5	20	DF	1338.45	3671.46	Koto	3302.8	2024-07-09 7:24:05	2024-06-26 16:23:40	2024-12-31 15:23:40	1	746	0.333	33.028
C:\Users\user-1\Desktop\My_PHD\5_Redaction_These\Chap2_Metabarcoding & Census\Census\1_Data_Collection\Dossier2\C016\Philantomba walteri\DSCF0016.JPG	DSCF0016.JPG	401717	767985	GardePro	10s	120	0.6	30	2024-06-26	16:23:40	2024-12-31	15:23:40	2024:07:09	2024-07-09	7:24:05	1.938	C016	Philantomba walteri	5	25	DF	1338.45	3671.46	Koto	3302.8	2024-07-09 7:24:05	2024-06-26 16:23:40	2024-12-31 15:23:40	1	747	0.333	33.028
C:\Users\user-1\Desktop\My_PHD\5_Redaction_These\Chap2_Metabarcoding & Census\Census\1_Data_Collection\Dossier2\C016\Philantomba walteri\DSCF0017.JPG	DSCF0017.JPG	401717	767985	GardePro	10s	120	0.6	30	2024-06-26	16:23:40	2024-12-31	15:23:40	2024:07:09	2024-07-09	7:24:14	1.938	C016	Philantomba walteri	6	35	DF	1338.45	3671.46	Koto	3302.8	2024-07-09 7:24:14	2024-06-26 16:23:40	2024-12-31 15:23:40	1	748	0.333	33.028
C:\Users\user-1\Desktop\My_PHD\5_Redaction_These\Chap2_Metabarcoding & Census\Census\1_Data_Collection\Dossier2\C016\Philantomba walteri\DSCF0018.JPG	DSCF0018.JPG	401717	767985	GardePro	10s	120	0.6	30	2024-06-26	16:23:40	2024-12-31	15:23:40	2024:07:09	2024-07-09	7:24:14	1.938	C016	Philantomba walteri	6	35	DF	1338.45	3671.46	Koto	3302.8	2024-07-09 7:24:14	2024-06-26 16:23:40	2024-12-31 15:23:40	1	749	0.333	33.028
C:\Users\user-1\Desktop\My_PHD\5_Redaction_These\Chap2_Metabarcoding & Census\Census\1_Data_Collection\Dossier4\C027\Crossarchus obscurus\DSCF0149.JPG	DSCF0149.JPG	405682	768980	GardePro	10s	120	0.6	30	2024-06-24	11:13:40	2024-12-31	10:13:40	2024:07:09	2024-07-09	8:05:25	2.118	C027	Crossarchus platycephalus	4	-38	DF	1322.08	3769.26	Koto	3302.8	2024-07-09 8:05:25	2024-06-24 11:13:40	2024-12-31 10:13:40	1	750	0.333	33.028
C:\Users\user-1\Desktop\My_PHD\5_Redaction_These\Chap2_Metabarcoding & Census\Census\1_Data_Collection\Dossier4\C027\Crossarchus obscurus\DSCF0150.JPG	DSCF0150.JPG	405682	768980	GardePro	10s	120	0.6	30	2024-06-24	11:13:40	2024-12-31	10:13:40	2024:07:09	2024-07-09	8:05:25	2.118	C027	Crossarchus platycephalus	4	-38	DF	1322.08	3769.26	Koto	3302.8	2024-07-09 8:05:25	2024-06-24 11:13:40	2024-12-31 10:13:40	1	751	0.333	33.028
C:\Users\user-1\Desktop\My_PHD\5_Redaction_These\Chap2_Metabarcoding & Census\Census\1_Data_Collection\Dossier4\C027\Crossarchus obscurus\DSCF0151.JPG	DSCF0151.JPG	405682	768980	GardePro	10s	120	0.6	30	2024-06-24	11:13:40	2024-12-31	10:13:40	2024:07:09	2024-07-09	8:05:32	2.119	C027	Crossarchus platycephalus	5	30	DF	1322.08	3769.26	Koto	3302.8	2024-07-09 8:05:32	2024-06-24 11:13:40	2024-12-31 10:13:40	1	752	0.333	33.028
C:\Users\user-1\Desktop\My_PHD\5_Redaction_These\Chap2_Metabarcoding & Census\Census\1_Data_Collection\Dossier4\C027\Crossarchus obscurus\DSCF0152.JPG	DSCF0152.JPG	405682	768980	GardePro	10s	120	0.6	30	2024-06-24	11:13:40	2024-12-31	10:13:40	2024:07:09	2024-07-09	8:05:33	2.119	C027	Crossarchus platycephalus	5	30	DF	1322.08	3769.26	Koto	3302.8	2024-07-09 8:05:33	2024-06-24 11:13:40	2024-12-31 10:13:40	1	753	0.333	33.028
C:\Users\user-1\Desktop\My_PHD\5_Redaction_These\Chap2_Metabarcoding & Census\Census\1_Data_Collection\Dossier4\C027\Xerus erythropus\DSCF0153.JPG	DSCF0153.JPG	405682	768980	GardePro	10s	120	0.6	30	2024-06-24	11:13:40	2024-12-31	10:13:40	2024:07:09	2024-07-09	14:46:40	3.869	C027	Xerus erythropus	7.5	0	DF	1322.08	3769.26	Koto	3302.8	2024-07-09 14:46:40	2024-06-24 11:13:40	2024-12-31 10:13:40	1	754	0.333	33.028
C:\Users\user-1\Desktop\My_PHD\5_Redaction_These\Chap2_Metabarcoding & Census\Census\1_Data_Collection\Dossier4\C027\Xerus erythropus\DSCF0154.JPG	DSCF0154.JPG	405682	768980	GardePro	10s	120	0.6	30	2024-06-24	11:13:40	2024-12-31	10:13:40	2024:07:09	2024-07-09	14:46:40	3.869	C027	Xerus erythropus	7.5	0	DF	1322.08	3769.26	Koto	3302.8	2024-07-09 14:46:40	2024-06-24 11:13:40	2024-12-31 10:13:40	1	755	0.333	33.028
C:\Users\user-1\Desktop\My_PHD\5_Redaction_These\Chap2_Metabarcoding & Census\Census\1_Data_Collection\Dossier5\C036\Cercopithecus mona\07090027.JPG	07090027.JPG	406699	769933	BUSHNEL	10s	35	0.6	33.5	2024-06-27	10:02:29	2024-12-31	9:02:29	2024:07:09	2024-07-09	10:43:29	2.808	C036	Cercopithecus mona	4.5	-3	DF	133.824	2649.54	Zalime	3302.8	2024-07-09 10:43:29	2024-06-27 10:02:29	2024-12-31 9:02:29	1	756	0.097	33.028
C:\Users\user-1\Desktop\My_PHD\5_Redaction_These\Chap2_Metabarcoding & Census\Census\1_Data_Collection\Dossier5\C036\Cercopithecus mona\07090028.JPG	07090028.JPG	406699	769933	BUSHNEL	10s	35	0.6	33.5	2024-06-27	10:02:29	2024-12-31	9:02:29	2024:07:09	2024-07-09	10:43:30	2.808	C036	Cercopithecus mona	4.5	-6	DF	133.824	2649.54	Zalime	3302.8	2024-07-09 10:43:30	2024-06-27 10:02:29	2024-12-31 9:02:29	1	757	0.097	33.028
C:\Users\user-1\Desktop\My_PHD\5_Redaction_These\Chap2_Metabarcoding & Census\Census\1_Data_Collection\Dossier5\C036\Cercopithecus mona\07090029.JPG	07090029.JPG	406699	769933	BUSHNEL	10s	35	0.6	33.5	2024-06-27	10:02:29	2024-12-31	9:02:29	2024:07:09	2024-07-09	10:44:28	2.812	C036	Cercopithecus mona	4.5	-3	DF	133.824	2649.54	Zalime	3302.8	2024-07-09 10:44:28	2024-06-27 10:02:29	2024-12-31 9:02:29	1	758	0.097	33.028
C:\Users\user-1\Desktop\My_PHD\5_Redaction_These\Chap2_Metabarcoding & Census\Census\1_Data_Collection\Dossier5\C036\Cercopithecus mona\07090030.JPG	07090030.JPG	406699	769933	BUSHNEL	10s	35	0.6	33.5	2024-06-27	10:02:29	2024-12-31	9:02:29	2024:07:09	2024-07-09	10:44:28	2.812	C036	Cercopithecus mona	4.5	-3	DF	133.824	2649.54	Zalime	3302.8	2024-07-09 10:44:28	2024-06-27 10:02:29	2024-12-31 9:02:29	1	759	0.097	33.028
C:\Users\user-1\Desktop\My_PHD\5_Redaction_These\Chap2_Metabarcoding & Census\Census\1_Data_Collection\Dossier5\C036\Cercopithecus mona\07090031.JPG	07090031.JPG	406699	769933	BUSHNEL	10s	35	0.6	33.5	2024-06-27	10:02:29	2024-12-31	9:02:29	2024:07:09	2024-07-09	10:44:47	2.813	C036	Cercopithecus mona	3.5	-15	DF	133.824	2649.54	Zalime	3302.8	2024-07-09 10:44:47	2024-06-27 10:02:29	2024-12-31 9:02:29	1	760	0.097	33.028
C:\Users\user-1\Desktop\My_PHD\5_Redaction_These\Chap2_Metabarcoding & Census\Census\1_Data_Collection\Dossier5\C036\Cercopithecus mona\07090032.JPG	07090032.JPG	406699	769933	BUSHNEL	10s	35	0.6	33.5	2024-06-27	10:02:29	2024-12-31	9:02:29	2024:07:09	2024-07-09	10:44:48	2.813	C036	Cercopithecus mona	3.5	-15	DF	133.824	2649.54	Zalime	3302.8	2024-07-09 10:44:48	2024-06-27 10:02:29	2024-12-31 9:02:29	1	761	0.097	33.028
C:\Users\user-1\Desktop\My_PHD\5_Redaction_These\Chap2_Metabarcoding & Census\Census\1_Data_Collection\Dossier5\C036\Cercopithecus mona\07090033.JPG	07090033.JPG	406699	769933	BUSHNEL	10s	35	0.6	33.5	2024-06-27	10:02:29	2024-12-31	9:02:29	2024:07:09	2024-07-09	10:44:59	2.814	C036	Cercopithecus mona	3.5	-15	DF	133.824	2649.54	Zalime	3302.8	2024-07-09 10:44:59	2024-06-27 10:02:29	2024-12-31 9:02:29	1	762	0.097	33.028
C:\Users\user-1\Desktop\My_PHD\5_Redaction_These\Chap2_Metabarcoding & Census\Census\1_Data_Collection\Dossier5\C036\Cercopithecus mona\07090034.JPG	07090034.JPG	406699	769933	BUSHNEL	10s	35	0.6	33.5	2024-06-27	10:02:29	2024-12-31	9:02:29	2024:07:09	2024-07-09	10:44:59	2.814	C036	Cercopithecus mona	3.5	-15	DF	133.824	2649.54	Zalime	3302.8	2024-07-09 10:44:59	2024-06-27 10:02:29	2024-12-31 9:02:29	1	763	0.097	33.028
C:\Users\user-1\Desktop\My_PHD\5_Redaction_These\Chap2_Metabarcoding & Census\Census\1_Data_Collection\Dossier5\C036\Cercopithecus mona\07090035.JPG	07090035.JPG	406699	769933	BUSHNEL	10s	35	0.6	33.5	2024-06-27	10:02:29	2024-12-31	9:02:29	2024:07:09	2024-07-09	10:45:25	2.816	C036	Cercopithecus mona	3.5	-15	DF	133.824	2649.54	Zalime	3302.8	2024-07-09 10:45:25	2024-06-27 10:02:29	2024-12-31 9:02:29	1	764	0.097	33.028
C:\Users\user-1\Desktop\My_PHD\5_Redaction_These\Chap2_Metabarcoding & Census\Census\1_Data_Collection\Dossier5\C036\Cercopithecus mona\07090036.JPG	07090036.JPG	406699	769933	BUSHNEL	10s	35	0.6	33.5	2024-06-27	10:02:29	2024-12-31	9:02:29	2024:07:09	2024-07-09	10:45:26	2.816	C036	Cercopithecus mona	3.5	-5	DF	133.824	2649.54	Zalime	3302.8	2024-07-09 10:45:26	2024-06-27 10:02:29	2024-12-31 9:02:29	1	765	0.097	33.028
C:\Users\user-1\Desktop\My_PHD\5_Redaction_These\Chap2_Metabarcoding & Census\Census\1_Data_Collection\Dossier1\C011\Xerus erythropus\DSCF0033.JPG	DSCF0033.JPG	404911	766437	GardePro	10s	120	0.6	30	2024-07-06	15:27:57	2024-12-31	14:27:57	2024:07:10	2024-07-10	7:19:26	1.917	C011	Xerus erythropus	5	-25	CF	736.954	4843.88	Koto	1050.91	2024-07-10 7:19:26	2024-07-06 15:27:57	2024-12-31 14:27:57	1	766	0.333	10.5091
C:\Users\user-1\Desktop\My_PHD\5_Redaction_These\Chap2_Metabarcoding & Census\Census\1_Data_Collection\Dossier1\C011\Xerus erythropus\DSCF0034.JPG	DSCF0034.JPG	404911	766437	GardePro	10s	120	0.6	30	2024-07-06	15:27:57	2024-12-31	14:27:57	2024:07:10	2024-07-10	7:19:27	1.917	C011	Xerus erythropus	5	-25	CF	736.954	4843.88	Koto	1050.91	2024-07-10 7:19:27	2024-07-06 15:27:57	2024-12-31 14:27:57	1	767	0.333	10.5091
C:\Users\user-1\Desktop\My_PHD\5_Redaction_These\Chap2_Metabarcoding & Census\Census\1_Data_Collection\Dossier1\C011\Xerus erythropus\DSCF0035.JPG	DSCF0035.JPG	404911	766437	GardePro	10s	120	0.6	30	2024-07-06	15:27:57	2024-12-31	14:27:57	2024:07:10	2024-07-10	7:20:06	1.92	C011	Xerus erythropus	6	23	CF	736.954	4843.88	Koto	1050.91	2024-07-10 7:20:06	2024-07-06 15:27:57	2024-12-31 14:27:57	1	768	0.333	10.5091
C:\Users\user-1\Desktop\My_PHD\5_Redaction_These\Chap2_Metabarcoding & Census\Census\1_Data_Collection\Dossier1\C011\Xerus erythropus\DSCF0036.JPG	DSCF0036.JPG	404911	766437	GardePro	10s	120	0.6	30	2024-07-06	15:27:57	2024-12-31	14:27:57	2024:07:10	2024-07-10	7:20:07	1.92	C011	Xerus erythropus	6	23	CF	736.954	4843.88	Koto	1050.91	2024-07-10 7:20:07	2024-07-06 15:27:57	2024-12-31 14:27:57	1	769	0.333	10.5091
C:\Users\user-1\Desktop\My_PHD\5_Redaction_These\Chap2_Metabarcoding & Census\Census\1_Data_Collection\Dossier1\C011\Xerus erythropus\DSCF0037.JPG	DSCF0037.JPG	404911	766437	GardePro	10s	120	0.6	30	2024-07-06	15:27:57	2024-12-31	14:27:57	2024:07:10	2024-07-10	7:20:15	1.921	C011	Xerus erythropus	6	35	CF	736.954	4843.88	Koto	1050.91	2024-07-10 7:20:15	2024-07-06 15:27:57	2024-12-31 14:27:57	1	770	0.333	10.5091
C:\Users\user-1\Desktop\My_PHD\5_Redaction_These\Chap2_Metabarcoding & Census\Census\1_Data_Collection\Dossier1\C011\Xerus erythropus\DSCF0038.JPG	DSCF0038.JPG	404911	766437	GardePro	10s	120	0.6	30	2024-07-06	15:27:57	2024-12-31	14:27:57	2024:07:10	2024-07-10	7:20:16	1.921	C011	Xerus erythropus	6	35	CF	736.954	4843.88	Koto	1050.91	2024-07-10 7:20:16	2024-07-06 15:27:57	2024-12-31 14:27:57	1	771	0.333	10.5091
C:\Users\user-1\Desktop\My_PHD\5_Redaction_These\Chap2_Metabarcoding & Census\Census\1_Data_Collection\Dossier1\C011\Xerus erythropus\DSCF0039.JPG	DSCF0039.JPG	404911	766437	GardePro	10s	120	0.6	30	2024-07-06	15:27:57	2024-12-31	14:27:57	2024:07:10	2024-07-10	7:21:17	1.925	C011	Xerus erythropus	6	-15	CF	736.954	4843.88	Koto	1050.91	2024-07-10 7:21:17	2024-07-06 15:27:57	2024-12-31 14:27:57	1	772	0.333	10.5091
C:\Users\user-1\Desktop\My_PHD\5_Redaction_These\Chap2_Metabarcoding & Census\Census\1_Data_Collection\Dossier1\C011\Xerus erythropus\DSCF0040.JPG	DSCF0040.JPG	404911	766437	GardePro	10s	120	0.6	30	2024-07-06	15:27:57	2024-12-31	14:27:57	2024:07:10	2024-07-10	7:21:18	1.926	C011	Xerus erythropus	5	-25	CF	736.954	4843.88	Koto	1050.91	2024-07-10 7:21:18	2024-07-06 15:27:57	2024-12-31 14:27:57	1	773	0.333	10.5091
C:\Users\user-1\Desktop\My_PHD\5_Redaction_These\Chap2_Metabarcoding & Census\Census\1_Data_Collection\Dossier1\C011\Xerus erythropus\DSCF0041.JPG	DSCF0041.JPG	404911	766437	GardePro	10s	120	0.6	30	2024-07-06	15:27:57	2024-12-31	14:27:57	2024:07:10	2024-07-10	7:32:46	1.976	C011	Xerus erythropus	3	-5	CF	736.954	4843.88	Koto	1050.91	2024-07-10 7:32:46	2024-07-06 15:27:57	2024-12-31 14:27:57	1	774	0.333	10.5091
C:\Users\user-1\Desktop\My_PHD\5_Redaction_These\Chap2_Metabarcoding & Census\Census\1_Data_Collection\Dossier1\C011\Xerus erythropus\DSCF0042.JPG	DSCF0042.JPG	404911	766437	GardePro	10s	120	0.6	30	2024-07-06	15:27:57	2024-12-31	14:27:57	2024:07:10	2024-07-10	7:32:47	1.976	C011	Xerus erythropus	3	-5	CF	736.954	4843.88	Koto	1050.91	2024-07-10 7:32:47	2024-07-06 15:27:57	2024-12-31 14:27:57	1	775	0.333	10.5091
C:\Users\user-1\Desktop\My_PHD\5_Redaction_These\Chap2_Metabarcoding & Census\Census\1_Data_Collection\Dossier1\C011\Xerus erythropus\DSCF0043.JPG	DSCF0043.JPG	404911	766437	GardePro	10s	120	0.6	30	2024-07-06	15:27:57	2024-12-31	14:27:57	2024:07:10	2024-07-10	7:32:57	1.976	C011	Xerus erythropus	3	0	CF	736.954	4843.88	Koto	1050.91	2024-07-10 7:32:57	2024-07-06 15:27:57	2024-12-31 14:27:57	1	776	0.333	10.5091
C:\Users\user-1\Desktop\My_PHD\5_Redaction_These\Chap2_Metabarcoding & Census\Census\1_Data_Collection\Dossier1\C011\Xerus erythropus\DSCF0044.JPG	DSCF0044.JPG	404911	766437	GardePro	10s	120	0.6	30	2024-07-06	15:27:57	2024-12-31	14:27:57	2024:07:10	2024-07-10	7:32:58	1.976	C011	Xerus erythropus	3	5	CF	736.954	4843.88	Koto	1050.91	2024-07-10 7:32:58	2024-07-06 15:27:57	2024-12-31 14:27:57	1	777	0.333	10.5091
C:\Users\user-1\Desktop\My_PHD\5_Redaction_These\Chap2_Metabarcoding & Census\Census\1_Data_Collection\Dossier1\C011\Xerus erythropus\DSCF0045.JPG	DSCF0045.JPG	404911	766437	GardePro	10s	120	0.6	30	2024-07-06	15:27:57	2024-12-31	14:27:57	2024:07:10	2024-07-10	7:46:03	2.034	C011	Xerus erythropus	3	-15	CF	736.954	4843.88	Koto	1050.91	2024-07-10 7:46:03	2024-07-06 15:27:57	2024-12-31 14:27:57	1	778	0.333	10.5091
C:\Users\user-1\Desktop\My_PHD\5_Redaction_These\Chap2_Metabarcoding & Census\Census\1_Data_Collection\Dossier1\C011\Xerus erythropus\DSCF0046.JPG	DSCF0046.JPG	404911	766437	GardePro	10s	120	0.6	30	2024-07-06	15:27:57	2024-12-31	14:27:57	2024:07:10	2024-07-10	7:46:04	2.034	C011	Xerus erythropus	3	-15	CF	736.954	4843.88	Koto	1050.91	2024-07-10 7:46:04	2024-07-06 15:27:57	2024-12-31 14:27:57	1	779	0.333	10.5091
C:\Users\user-1\Desktop\My_PHD\5_Redaction_These\Chap2_Metabarcoding & Census\Census\1_Data_Collection\Dossier3\C024\Xerus erythropus\DSCF0003.JPG	DSCF0003.JPG	402768	769056	GardePro	10s	120	0.6	30	2024-07-01	12:24:15	2024-12-31	11:24:15	2024:07:10	2024-07-10	7:28:29	1.957	C024	Xerus erythropus	3.5	-32	DF	1482.76	2487.61	Koto	3302.8	2024-07-10 7:28:29	2024-07-01 12:24:15	2024-12-31 11:24:15	1	780	0.333	33.028
C:\Users\user-1\Desktop\My_PHD\5_Redaction_These\Chap2_Metabarcoding & Census\Census\1_Data_Collection\Dossier3\C024\Xerus erythropus\DSCF0004.JPG	DSCF0004.JPG	402768	769056	GardePro	10s	120	0.6	30	2024-07-01	12:24:15	2024-12-31	11:24:15	2024:07:10	2024-07-10	7:28:29	1.957	C024	Xerus erythropus	3.5	-25	DF	1482.76	2487.61	Koto	3302.8	2024-07-10 7:28:29	2024-07-01 12:24:15	2024-12-31 11:24:15	1	781	0.333	33.028
C:\Users\user-1\Desktop\My_PHD\5_Redaction_These\Chap2_Metabarcoding & Census\Census\1_Data_Collection\Dossier3\C024\Xerus erythropus\DSCF0005.JPG	DSCF0005.JPG	402768	769056	GardePro	10s	120	0.6	30	2024-07-01	12:24:15	2024-12-31	11:24:15	2024:07:10	2024-07-10	10:55:09	2.859	C024	Xerus erythropus	4	-30	DF	1482.76	2487.61	Koto	3302.8	2024-07-10 10:55:09	2024-07-01 12:24:15	2024-12-31 11:24:15	1	782	0.333	33.028
C:\Users\user-1\Desktop\My_PHD\5_Redaction_These\Chap2_Metabarcoding & Census\Census\1_Data_Collection\Dossier3\C024\Xerus erythropus\DSCF0006.JPG	DSCF0006.JPG	402768	769056	GardePro	10s	120	0.6	30	2024-07-01	12:24:15	2024-12-31	11:24:15	2024:07:10	2024-07-10	10:55:09	2.859	C024	Xerus erythropus	4	-30	DF	1482.76	2487.61	Koto	3302.8	2024-07-10 10:55:09	2024-07-01 12:24:15	2024-12-31 11:24:15	1	783	0.333	33.028
C:\Users\user-1\Desktop\My_PHD\5_Redaction_These\Chap2_Metabarcoding & Census\Census\1_Data_Collection\Dossier4\C027\Xerus erythropus\DSCF0155.JPG	DSCF0155.JPG	405682	768980	GardePro	10s	120	0.6	30	2024-06-24	11:13:40	2024-12-31	10:13:40	2024:07:10	2024-07-10	13:35:02	3.556	C027	Xerus erythropus	6	-30	DF	1322.08	3769.26	Koto	3302.8	2024-07-10 13:35:02	2024-06-24 11:13:40	2024-12-31 10:13:40	1	784	0.333	33.028
C:\Users\user-1\Desktop\My_PHD\5_Redaction_These\Chap2_Metabarcoding & Census\Census\1_Data_Collection\Dossier4\C027\Xerus erythropus\DSCF0156.JPG	DSCF0156.JPG	405682	768980	GardePro	10s	120	0.6	30	2024-06-24	11:13:40	2024-12-31	10:13:40	2024:07:10	2024-07-10	13:35:03	3.556	C027	Xerus erythropus	6	-30	DF	1322.08	3769.26	Koto	3302.8	2024-07-10 13:35:03	2024-06-24 11:13:40	2024-12-31 10:13:40	1	785	0.333	33.028
C:\Users\user-1\Desktop\My_PHD\5_Redaction_These\Chap2_Metabarcoding & Census\Census\1_Data_Collection\Dossier4\C031\Crossarchus obscurus\DSCF0015.JPG	DSCF0015.JPG	401727	769892	GardePro	10s	120	0.6	30	2024-07-01	14:54:02	2024-12-31	13:54:02	2024:07:10	2024-07-10	7:48:30	2.044	C031	Crossarchus platycephalus	2	-20	DF	713.901	1884.32	Koto	3302.8	2024-07-10 7:48:30	2024-07-01 14:54:02	2024-12-31 13:54:02	1	786	0.333	33.028
C:\Users\user-1\Desktop\My_PHD\5_Redaction_These\Chap2_Metabarcoding & Census\Census\1_Data_Collection\Dossier4\C031\Crossarchus obscurus\DSCF0015.JPG	DSCF0015.JPG	401727	769892	GardePro	10s	120	0.6	30	2024-07-01	14:54:02	2024-12-31	13:54:02	2024:07:10	2024-07-10	7:48:30	2.044	C031	Crossarchus platycephalus	2	-20	DF	713.901	1884.32	Koto	3302.8	2024-07-10 7:48:30	2024-07-01 14:54:02	2024-12-31 13:54:02	1	787	0.333	33.028
C:\Users\user-1\Desktop\My_PHD\5_Redaction_These\Chap2_Metabarcoding & Census\Census\1_Data_Collection\Dossier4\C031\Crossarchus obscurus\DSCF0016.JPG	DSCF0016.JPG	401727	769892	GardePro	10s	120	0.6	30	2024-07-01	14:54:02	2024-12-31	13:54:02	2024:07:10	2024-07-10	7:48:30	2.044	C031	Crossarchus platycephalus	2	0	DF	713.901	1884.32	Koto	3302.8	2024-07-10 7:48:30	2024-07-01 14:54:02	2024-12-31 13:54:02	1	788	0.333	33.028
C:\Users\user-1\Desktop\My_PHD\5_Redaction_These\Chap2_Metabarcoding & Census\Census\1_Data_Collection\Dossier4\C031\Crossarchus obscurus\DSCF0016.JPG	DSCF0016.JPG	401727	769892	GardePro	10s	120	0.6	30	2024-07-01	14:54:02	2024-12-31	13:54:02	2024:07:10	2024-07-10	7:48:30	2.044	C031	Crossarchus platycephalus	2	0	DF	713.901	1884.32	Koto	3302.8	2024-07-10 7:48:30	2024-07-01 14:54:02	2024-12-31 13:54:02	1	789	0.333	33.028
C:\Users\user-1\Desktop\My_PHD\5_Redaction_These\Chap2_Metabarcoding & Census\Census\1_Data_Collection\Dossier1\C011\Philantomba walteri\DSCF0047.JPG	DSCF0047.JPG	404911	766437	GardePro	10s	120	0.6	30	2024-07-06	15:27:57	2024-12-31	14:27:57	2024:07:11	2024-07-11	12:00:26	3.143	C011	Philantomba walteri	6.5	35	CF	736.954	4843.88	Koto	1050.91	2024-07-11 12:00:26	2024-07-06 15:27:57	2024-12-31 14:27:57	1	790	0.333	10.5091
C:\Users\user-1\Desktop\My_PHD\5_Redaction_These\Chap2_Metabarcoding & Census\Census\1_Data_Collection\Dossier1\C011\Philantomba walteri\DSCF0048.JPG	DSCF0048.JPG	404911	766437	GardePro	10s	120	0.6	30	2024-07-06	15:27:57	2024-12-31	14:27:57	2024:07:11	2024-07-11	12:00:26	3.143	C011	Philantomba walteri	6.5	38	CF	736.954	4843.88	Koto	1050.91	2024-07-11 12:00:26	2024-07-06 15:27:57	2024-12-31 14:27:57	1	791	0.333	10.5091
C:\Users\user-1\Desktop\My_PHD\5_Redaction_These\Chap2_Metabarcoding & Census\Census\1_Data_Collection\Dossier1\C013\Genetta genetta\07110001.JPG	07110001.JPG	406937	767134	BUSHNEL	10s	35	0.6	33.5	2024-07-06	16:11:03	2024-12-31	15:11:03	2024:07:11	2024-07-11	4:36:03	1.204	C013	Genetta pardina/maculata	1.8	12	CF	305.923	3902.94	Akpe	1050.91	2024-07-11 4:36:03	2024-07-06 16:11:03	2024-12-31 15:11:03	1	792	0.097	10.5091
C:\Users\user-1\Desktop\My_PHD\5_Redaction_These\Chap2_Metabarcoding & Census\Census\1_Data_Collection\Dossier1\C013\Genetta genetta\07110002.JPG	07110002.JPG	406937	767134	BUSHNEL	10s	35	0.6	33.5	2024-07-06	16:11:03	2024-12-31	15:11:03	2024:07:11	2024-07-11	4:36:03	1.204	C013	Genetta pardina/maculata	1.8	12	CF	305.923	3902.94	Akpe	1050.91	2024-07-11 4:36:03	2024-07-06 16:11:03	2024-12-31 15:11:03	1	793	0.097	10.5091
C:\Users\user-1\Desktop\My_PHD\5_Redaction_These\Chap2_Metabarcoding & Census\Census\1_Data_Collection\Dossier3\C024\Potamochoerus porcus\DSCF0007.JPG	DSCF0007.JPG	402768	769056	GardePro	10s	120	0.6	30	2024-07-01	12:24:15	2024-12-31	11:24:15	2024:07:11	2024-07-11	16:45:15	4.386	C024	Potamochoerus porcus	2	0	DF	1482.76	2487.61	Koto	3302.8	2024-07-11 16:45:15	2024-07-01 12:24:15	2024-12-31 11:24:15	1	794	0.333	33.028
C:\Users\user-1\Desktop\My_PHD\5_Redaction_These\Chap2_Metabarcoding & Census\Census\1_Data_Collection\Dossier3\C024\Potamochoerus porcus\DSCF0007.JPG	DSCF0007.JPG	402768	769056	GardePro	10s	120	0.6	30	2024-07-01	12:24:15	2024-12-31	11:24:15	2024:07:11	2024-07-11	16:45:15	4.386	C024	Potamochoerus porcus	2	0	DF	1482.76	2487.61	Koto	3302.8	2024-07-11 16:45:15	2024-07-01 12:24:15	2024-12-31 11:24:15	1	795	0.333	33.028
C:\Users\user-1\Desktop\My_PHD\5_Redaction_These\Chap2_Metabarcoding & Census\Census\1_Data_Collection\Dossier3\C024\Potamochoerus porcus\DSCF0007.JPG	DSCF0007.JPG	402768	769056	GardePro	10s	120	0.6	30	2024-07-01	12:24:15	2024-12-31	11:24:15	2024:07:11	2024-07-11	16:45:15	4.386	C024	Potamochoerus porcus	2	0	DF	1482.76	2487.61	Koto	3302.8	2024-07-11 16:45:15	2024-07-01 12:24:15	2024-12-31 11:24:15	1	796	0.333	33.028
C:\Users\user-1\Desktop\My_PHD\5_Redaction_These\Chap2_Metabarcoding & Census\Census\1_Data_Collection\Dossier4\C027\Potamochoerus porcus\DSCF0161.JPG	DSCF0161.JPG	405682	768980	GardePro	10s	120	0.6	30	2024-06-24	11:13:40	2024-12-31	10:13:40	2024:07:11	2024-07-11	5:19:52	1.396	C027	Potamochoerus porcus	0.5	0	DF	1322.08	3769.26	Koto	3302.8	2024-07-11 5:19:52	2024-06-24 11:13:40	2024-12-31 10:13:40	1	797	0.333	33.028
C:\Users\user-1\Desktop\My_PHD\5_Redaction_These\Chap2_Metabarcoding & Census\Census\1_Data_Collection\Dossier4\C027\Potamochoerus porcus\DSCF0162.JPG	DSCF0162.JPG	405682	768980	GardePro	10s	120	0.6	30	2024-06-24	11:13:40	2024-12-31	10:13:40	2024:07:11	2024-07-11	5:19:52	1.396	C027	Potamochoerus porcus	0.5	0	DF	1322.08	3769.26	Koto	3302.8	2024-07-11 5:19:52	2024-06-24 11:13:40	2024-12-31 10:13:40	1	798	0.333	33.028
C:\Users\user-1\Desktop\My_PHD\5_Redaction_These\Chap2_Metabarcoding & Census\Census\1_Data_Collection\Dossier4\C027\Potamochoerus porcus\DSCF0163.JPG	DSCF0163.JPG	405682	768980	GardePro	10s	120	0.6	30	2024-06-24	11:13:40	2024-12-31	10:13:40	2024:07:11	2024-07-11	5:19:55	1.396	C027	Potamochoerus porcus	0.5	-60	DF	1322.08	3769.26	Koto	3302.8	2024-07-11 5:19:55	2024-06-24 11:13:40	2024-12-31 10:13:40	1	799	0.333	33.028
C:\Users\user-1\Desktop\My_PHD\5_Redaction_These\Chap2_Metabarcoding & Census\Census\1_Data_Collection\Dossier4\C027\Potamochoerus porcus\DSCF0164.JPG	DSCF0164.JPG	405682	768980	GardePro	10s	120	0.6	30	2024-06-24	11:13:40	2024-12-31	10:13:40	2024:07:11	2024-07-11	5:19:55	1.396	C027	Potamochoerus porcus	0.5	-60	DF	1322.08	3769.26	Koto	3302.8	2024-07-11 5:19:55	2024-06-24 11:13:40	2024-12-31 10:13:40	1	800	0.333	33.028
C:\Users\user-1\Desktop\My_PHD\5_Redaction_These\Chap2_Metabarcoding & Census\Census\1_Data_Collection\Dossier4\C027\Potamochoerus porcus\DSCF0165.JPG	DSCF0165.JPG	405682	768980	GardePro	10s	120	0.6	30	2024-06-24	11:13:40	2024-12-31	10:13:40	2024:07:11	2024-07-11	5:20:01	1.396	C027	Potamochoerus porcus	0.5	-45	DF	1322.08	3769.26	Koto	3302.8	2024-07-11 5:20:01	2024-06-24 11:13:40	2024-12-31 10:13:40	1	801	0.333	33.028
C:\Users\user-1\Desktop\My_PHD\5_Redaction_These\Chap2_Metabarcoding & Census\Census\1_Data_Collection\Dossier4\C027\Potamochoerus porcus\DSCF0166.JPG	DSCF0166.JPG	405682	768980	GardePro	10s	120	0.6	30	2024-06-24	11:13:40	2024-12-31	10:13:40	2024:07:11	2024-07-11	5:20:01	1.396	C027	Potamochoerus porcus	0.5	-45	DF	1322.08	3769.26	Koto	3302.8	2024-07-11 5:20:01	2024-06-24 11:13:40	2024-12-31 10:13:40	1	802	0.333	33.028
C:\Users\user-1\Desktop\My_PHD\5_Redaction_These\Chap2_Metabarcoding & Census\Census\1_Data_Collection\Dossier4\C027\Potamochoerus porcus\DSCF0167.JPG	DSCF0167.JPG	405682	768980	GardePro	10s	120	0.6	30	2024-06-24	11:13:40	2024-12-31	10:13:40	2024:07:11	2024-07-11	5:20:09	1.397	C027	Potamochoerus porcus	0.5	-45	DF	1322.08	3769.26	Koto	3302.8	2024-07-11 5:20:09	2024-06-24 11:13:40	2024-12-31 10:13:40	1	803	0.333	33.028
C:\Users\user-1\Desktop\My_PHD\5_Redaction_These\Chap2_Metabarcoding & Census\Census\1_Data_Collection\Dossier4\C027\Potamochoerus porcus\DSCF0167.JPG	DSCF0167.JPG	405682	768980	GardePro	10s	120	0.6	30	2024-06-24	11:13:40	2024-12-31	10:13:40	2024:07:11	2024-07-11	5:20:09	1.397	C027	Potamochoerus porcus	0.5	-45	DF	1322.08	3769.26	Koto	3302.8	2024-07-11 5:20:09	2024-06-24 11:13:40	2024-12-31 10:13:40	1	804	0.333	33.028
C:\Users\user-1\Desktop\My_PHD\5_Redaction_These\Chap2_Metabarcoding & Census\Census\1_Data_Collection\Dossier4\C027\Potamochoerus porcus\DSCF0168.JPG	DSCF0168.JPG	405682	768980	GardePro	10s	120	0.6	30	2024-06-24	11:13:40	2024-12-31	10:13:40	2024:07:11	2024-07-11	5:20:09	1.397	C027	Potamochoerus porcus	0.5	-45	DF	1322.08	3769.26	Koto	3302.8	2024-07-11 5:20:09	2024-06-24 11:13:40	2024-12-31 10:13:40	1	805	0.333	33.028
C:\Users\user-1\Desktop\My_PHD\5_Redaction_These\Chap2_Metabarcoding & Census\Census\1_Data_Collection\Dossier4\C027\Potamochoerus porcus\DSCF0168.JPG	DSCF0168.JPG	405682	768980	GardePro	10s	120	0.6	30	2024-06-24	11:13:40	2024-12-31	10:13:40	2024:07:11	2024-07-11	5:20:09	1.397	C027	Potamochoerus porcus	0.5	-45	DF	1322.08	3769.26	Koto	3302.8	2024-07-11 5:20:09	2024-06-24 11:13:40	2024-12-31 10:13:40	1	806	0.333	33.028
C:\Users\user-1\Desktop\My_PHD\5_Redaction_These\Chap2_Metabarcoding & Census\Census\1_Data_Collection\Dossier4\C027\Potamochoerus porcus\DSCF0169.JPG	DSCF0169.JPG	405682	768980	GardePro	10s	120	0.6	30	2024-06-24	11:13:40	2024-12-31	10:13:40	2024:07:11	2024-07-11	5:20:15	1.397	C027	Potamochoerus porcus	5	-45	DF	1322.08	3769.26	Koto	3302.8	2024-07-11 5:20:15	2024-06-24 11:13:40	2024-12-31 10:13:40	1	807	0.333	33.028
C:\Users\user-1\Desktop\My_PHD\5_Redaction_These\Chap2_Metabarcoding & Census\Census\1_Data_Collection\Dossier4\C027\Potamochoerus porcus\DSCF0170.JPG	DSCF0170.JPG	405682	768980	GardePro	10s	120	0.6	30	2024-06-24	11:13:40	2024-12-31	10:13:40	2024:07:11	2024-07-11	5:20:16	1.397	C027	Potamochoerus porcus	5	-45	DF	1322.08	3769.26	Koto	3302.8	2024-07-11 5:20:16	2024-06-24 11:13:40	2024-12-31 10:13:40	1	808	0.333	33.028
C:\Users\user-1\Desktop\My_PHD\5_Redaction_These\Chap2_Metabarcoding & Census\Census\1_Data_Collection\Dossier5\C035\Genetta genetta\07110021.JPG	07110021.JPG	405710	769960	BUSHNEL	10s	35	0.6	33.5	2024-06-27	10:59:48	2024-12-31	9:59:48	2024:07:11	2024-07-11	0:50:23	0.22	C035	Genetta pardina/maculata	3.5	9	DF	604.665	3200.45	Koto	3302.8	2024-07-11 0:50:23	2024-06-27 10:59:48	2024-12-31 9:59:48	1	809	0.097	33.028
C:\Users\user-1\Desktop\My_PHD\5_Redaction_These\Chap2_Metabarcoding & Census\Census\1_Data_Collection\Dossier5\C035\Genetta genetta\07110022.JPG	07110022.JPG	405710	769960	BUSHNEL	10s	35	0.6	33.5	2024-06-27	10:59:48	2024-12-31	9:59:48	2024:07:11	2024-07-11	0:50:23	0.22	C035	Genetta pardina/maculata	3.5	9	DF	604.665	3200.45	Koto	3302.8	2024-07-11 0:50:23	2024-06-27 10:59:48	2024-12-31 9:59:48	1	810	0.097	33.028
C:\Users\user-1\Desktop\My_PHD\5_Redaction_These\Chap2_Metabarcoding & Census\Census\1_Data_Collection\Dossier5\C035\Genetta genetta\07110023.JPG	07110023.JPG	405710	769960	BUSHNEL	10s	35	0.6	33.5	2024-06-27	10:59:48	2024-12-31	9:59:48	2024:07:11	2024-07-11	0:50:34	0.221	C035	Genetta pardina/maculata	3.5	-3	DF	604.665	3200.45	Koto	3302.8	2024-07-11 0:50:34	2024-06-27 10:59:48	2024-12-31 9:59:48	1	811	0.097	33.028
C:\Users\user-1\Desktop\My_PHD\5_Redaction_These\Chap2_Metabarcoding & Census\Census\1_Data_Collection\Dossier5\C035\Genetta genetta\07110024.JPG	07110024.JPG	405710	769960	BUSHNEL	10s	35	0.6	33.5	2024-06-27	10:59:48	2024-12-31	9:59:48	2024:07:11	2024-07-11	0:50:34	0.221	C035	Genetta pardina/maculata	3.5	-3	DF	604.665	3200.45	Koto	3302.8	2024-07-11 0:50:34	2024-06-27 10:59:48	2024-12-31 9:59:48	1	812	0.097	33.028
C:\Users\user-1\Desktop\My_PHD\5_Redaction_These\Chap2_Metabarcoding & Census\Census\1_Data_Collection\Dossier1\C010\Philantomba walteri\DSCF0023.JPG	DSCF0023.JPG	403182	767030	GardePro	10s	120	0.6	30	2024-07-06	13:45:47	2024-12-31	12:45:47	2024:07:12	2024-07-12	10:32:52	2.761	C010	Philantomba walteri	5.5	20	CF	1423.16	4559.62	Koto	1050.91	2024-07-12 10:32:52	2024-07-06 13:45:47	2024-12-31 12:45:47	1	813	0.333	10.5091
C:\Users\user-1\Desktop\My_PHD\5_Redaction_These\Chap2_Metabarcoding & Census\Census\1_Data_Collection\Dossier1\C010\Philantomba walteri\DSCF0024.JPG	DSCF0024.JPG	403182	767030	GardePro	10s	120	0.6	30	2024-07-06	13:45:47	2024-12-31	12:45:47	2024:07:12	2024-07-12	10:32:53	2.761	C010	Philantomba walteri	5.5	22	CF	1423.16	4559.62	Koto	1050.91	2024-07-12 10:32:53	2024-07-06 13:45:47	2024-12-31 12:45:47	1	814	0.333	10.5091
C:\Users\user-1\Desktop\My_PHD\5_Redaction_These\Chap2_Metabarcoding & Census\Census\1_Data_Collection\Dossier1\C010\Philantomba walteri\DSCF0025.JPG	DSCF0025.JPG	403182	767030	GardePro	10s	120	0.6	30	2024-07-06	13:45:47	2024-12-31	12:45:47	2024:07:12	2024-07-12	10:33:39	2.765	C010	Philantomba walteri	6	10	CF	1423.16	4559.62	Koto	1050.91	2024-07-12 10:33:39	2024-07-06 13:45:47	2024-12-31 12:45:47	1	815	0.333	10.5091
C:\Users\user-1\Desktop\My_PHD\5_Redaction_These\Chap2_Metabarcoding & Census\Census\1_Data_Collection\Dossier1\C010\Philantomba walteri\DSCF0026.JPG	DSCF0026.JPG	403182	767030	GardePro	10s	120	0.6	30	2024-07-06	13:45:47	2024-12-31	12:45:47	2024:07:12	2024-07-12	10:33:39	2.765	C010	Philantomba walteri	6	10	CF	1423.16	4559.62	Koto	1050.91	2024-07-12 10:33:39	2024-07-06 13:45:47	2024-12-31 12:45:47	1	816	0.333	10.5091
C:\Users\user-1\Desktop\My_PHD\5_Redaction_These\Chap2_Metabarcoding & Census\Census\1_Data_Collection\Dossier1\C010\Philantomba walteri\DSCF0027.JPG	DSCF0027.JPG	403182	767030	GardePro	10s	120	0.6	30	2024-07-06	13:45:47	2024-12-31	12:45:47	2024:07:12	2024-07-12	10:33:45	2.765	C010	Philantomba walteri	5.5	20	CF	1423.16	4559.62	Koto	1050.91	2024-07-12 10:33:45	2024-07-06 13:45:47	2024-12-31 12:45:47	1	817	0.333	10.5091
C:\Users\user-1\Desktop\My_PHD\5_Redaction_These\Chap2_Metabarcoding & Census\Census\1_Data_Collection\Dossier1\C010\Philantomba walteri\DSCF0028.JPG	DSCF0028.JPG	403182	767030	GardePro	10s	120	0.6	30	2024-07-06	13:45:47	2024-12-31	12:45:47	2024:07:12	2024-07-12	10:33:45	2.765	C010	Philantomba walteri	4.5	20	CF	1423.16	4559.62	Koto	1050.91	2024-07-12 10:33:45	2024-07-06 13:45:47	2024-12-31 12:45:47	1	818	0.333	10.5091
C:\Users\user-1\Desktop\My_PHD\5_Redaction_These\Chap2_Metabarcoding & Census\Census\1_Data_Collection\Dossier1\C010\Philantomba walteri\DSCF0029.JPG	DSCF0029.JPG	403182	767030	GardePro	10s	120	0.6	30	2024-07-06	13:45:47	2024-12-31	12:45:47	2024:07:12	2024-07-12	10:33:57	2.766	C010	Philantomba walteri	4	25	CF	1423.16	4559.62	Koto	1050.91	2024-07-12 10:33:57	2024-07-06 13:45:47	2024-12-31 12:45:47	1	819	0.333	10.5091
C:\Users\user-1\Desktop\My_PHD\5_Redaction_These\Chap2_Metabarcoding & Census\Census\1_Data_Collection\Dossier1\C010\Philantomba walteri\DSCF0030.JPG	DSCF0030.JPG	403182	767030	GardePro	10s	120	0.6	30	2024-07-06	13:45:47	2024-12-31	12:45:47	2024:07:12	2024-07-12	10:33:57	2.766	C010	Philantomba walteri	4	25	CF	1423.16	4559.62	Koto	1050.91	2024-07-12 10:33:57	2024-07-06 13:45:47	2024-12-31 12:45:47	1	820	0.333	10.5091
C:\Users\user-1\Desktop\My_PHD\5_Redaction_These\Chap2_Metabarcoding & Census\Census\1_Data_Collection\Dossier1\C010\Philantomba walteri\DSCF0031.JPG	DSCF0031.JPG	403182	767030	GardePro	10s	120	0.6	30	2024-07-06	13:45:47	2024-12-31	12:45:47	2024:07:12	2024-07-12	10:34:01	2.766	C010	Philantomba walteri	4	25	CF	1423.16	4559.62	Koto	1050.91	2024-07-12 10:34:01	2024-07-06 13:45:47	2024-12-31 12:45:47	1	821	0.333	10.5091
C:\Users\user-1\Desktop\My_PHD\5_Redaction_These\Chap2_Metabarcoding & Census\Census\1_Data_Collection\Dossier1\C010\Philantomba walteri\DSCF0032.JPG	DSCF0032.JPG	403182	767030	GardePro	10s	120	0.6	30	2024-07-06	13:45:47	2024-12-31	12:45:47	2024:07:12	2024-07-12	10:34:01	2.766	C010	Philantomba walteri	4	25	CF	1423.16	4559.62	Koto	1050.91	2024-07-12 10:34:01	2024-07-06 13:45:47	2024-12-31 12:45:47	1	822	0.333	10.5091
C:\Users\user-1\Desktop\My_PHD\5_Redaction_These\Chap2_Metabarcoding & Census\Census\1_Data_Collection\Dossier1\C010\Philantomba walteri\DSCF0033.JPG	DSCF0033.JPG	403182	767030	GardePro	10s	120	0.6	30	2024-07-06	13:45:47	2024-12-31	12:45:47	2024:07:12	2024-07-12	10:34:08	2.767	C010	Philantomba walteri	5	3	CF	1423.16	4559.62	Koto	1050.91	2024-07-12 10:34:08	2024-07-06 13:45:47	2024-12-31 12:45:47	1	823	0.333	10.5091
C:\Users\user-1\Desktop\My_PHD\5_Redaction_These\Chap2_Metabarcoding & Census\Census\1_Data_Collection\Dossier1\C010\Philantomba walteri\DSCF0034.JPG	DSCF0034.JPG	403182	767030	GardePro	10s	120	0.6	30	2024-07-06	13:45:47	2024-12-31	12:45:47	2024:07:12	2024-07-12	10:34:09	2.767	C010	Philantomba walteri	5	3	CF	1423.16	4559.62	Koto	1050.91	2024-07-12 10:34:09	2024-07-06 13:45:47	2024-12-31 12:45:47	1	824	0.333	10.5091
C:\Users\user-1\Desktop\My_PHD\5_Redaction_These\Chap2_Metabarcoding & Census\Census\1_Data_Collection\Dossier1\C010\Philantomba walteri\DSCF0035.JPG	DSCF0035.JPG	403182	767030	GardePro	10s	120	0.6	30	2024-07-06	13:45:47	2024-12-31	12:45:47	2024:07:12	2024-07-12	10:34:17	2.768	C010	Philantomba walteri	5.5	10	CF	1423.16	4559.62	Koto	1050.91	2024-07-12 10:34:17	2024-07-06 13:45:47	2024-12-31 12:45:47	1	825	0.333	10.5091
C:\Users\user-1\Desktop\My_PHD\5_Redaction_These\Chap2_Metabarcoding & Census\Census\1_Data_Collection\Dossier1\C010\Philantomba walteri\DSCF0036.JPG	DSCF0036.JPG	403182	767030	GardePro	10s	120	0.6	30	2024-07-06	13:45:47	2024-12-31	12:45:47	2024:07:12	2024-07-12	10:34:18	2.768	C010	Philantomba walteri	5.5	20	CF	1423.16	4559.62	Koto	1050.91	2024-07-12 10:34:18	2024-07-06 13:45:47	2024-12-31 12:45:47	1	826	0.333	10.5091
C:\Users\user-1\Desktop\My_PHD\5_Redaction_These\Chap2_Metabarcoding & Census\Census\1_Data_Collection\Dossier1\C013\Philantomba walteri\07120003.JPG	07120003.JPG	406937	767134	BUSHNEL	10s	35	0.6	33.5	2024-07-06	16:11:03	2024-12-31	15:11:03	2024:07:12	2024-07-12	8:18:31	2.175	C013	Philantomba walteri	4	-10	CF	305.923	3902.94	Akpe	1050.91	2024-07-12 8:18:31	2024-07-06 16:11:03	2024-12-31 15:11:03	1	827	0.097	10.5091
C:\Users\user-1\Desktop\My_PHD\5_Redaction_These\Chap2_Metabarcoding & Census\Census\1_Data_Collection\Dossier1\C013\Philantomba walteri\07120004.JPG	07120004.JPG	406937	767134	BUSHNEL	10s	35	0.6	33.5	2024-07-06	16:11:03	2024-12-31	15:11:03	2024:07:12	2024-07-12	8:18:32	2.175	C013	Philantomba walteri	4	-11	CF	305.923	3902.94	Akpe	1050.91	2024-07-12 8:18:32	2024-07-06 16:11:03	2024-12-31 15:11:03	1	828	0.097	10.5091
C:\Users\user-1\Desktop\My_PHD\5_Redaction_These\Chap2_Metabarcoding & Census\Census\1_Data_Collection\Dossier1\C013\Philantomba walteri\07120005.JPG	07120005.JPG	406937	767134	BUSHNEL	10s	35	0.6	33.5	2024-07-06	16:11:03	2024-12-31	15:11:03	2024:07:12	2024-07-12	8:18:42	2.176	C013	Philantomba walteri	3.5	-12	CF	305.923	3902.94	Akpe	1050.91	2024-07-12 8:18:42	2024-07-06 16:11:03	2024-12-31 15:11:03	1	829	0.097	10.5091
C:\Users\user-1\Desktop\My_PHD\5_Redaction_These\Chap2_Metabarcoding & Census\Census\1_Data_Collection\Dossier1\C013\Philantomba walteri\07120006.JPG	07120006.JPG	406937	767134	BUSHNEL	10s	35	0.6	33.5	2024-07-06	16:11:03	2024-12-31	15:11:03	2024:07:12	2024-07-12	8:18:42	2.176	C013	Philantomba walteri	3.5	-12	CF	305.923	3902.94	Akpe	1050.91	2024-07-12 8:18:42	2024-07-06 16:11:03	2024-12-31 15:11:03	1	830	0.097	10.5091
C:\Users\user-1\Desktop\My_PHD\5_Redaction_These\Chap2_Metabarcoding & Census\Census\1_Data_Collection\Dossier3\C023\Xerus erythropus\DSCF0041.JPG	DSCF0041.JPG	401833	769042	GardePro	10s	120	0.6	30	2024-07-01	13:50:17	2024-12-31	12:50:17	2024:07:12	2024-07-12	7:08:58	1.872	C023	Xerus erythropus	5	0	DF	1610.83	2741.37	Koto	3302.8	2024-07-12 7:08:58	2024-07-01 13:50:17	2024-12-31 12:50:17	1	831	0.333	33.028
C:\Users\user-1\Desktop\My_PHD\5_Redaction_These\Chap2_Metabarcoding & Census\Census\1_Data_Collection\Dossier3\C023\Xerus erythropus\DSCF0042.JPG	DSCF0042.JPG	401833	769042	GardePro	10s	120	0.6	30	2024-07-01	13:50:17	2024-12-31	12:50:17	2024:07:12	2024-07-12	7:08:58	1.872	C023	Xerus erythropus	5	-10	DF	1610.83	2741.37	Koto	3302.8	2024-07-12 7:08:58	2024-07-01 13:50:17	2024-12-31 12:50:17	1	832	0.333	33.028
C:\Users\user-1\Desktop\My_PHD\5_Redaction_These\Chap2_Metabarcoding & Census\Census\1_Data_Collection\Dossier4\C027\Xerus erythropus\DSCF0171.JPG	DSCF0171.JPG	405682	768980	GardePro	10s	120	0.6	30	2024-06-24	11:13:40	2024-12-31	10:13:40	2024:07:12	2024-07-12	12:57:37	3.393	C027	Xerus erythropus	6.5	-30	DF	1322.08	3769.26	Koto	3302.8	2024-07-12 12:57:37	2024-06-24 11:13:40	2024-12-31 10:13:40	1	833	0.333	33.028
C:\Users\user-1\Desktop\My_PHD\5_Redaction_These\Chap2_Metabarcoding & Census\Census\1_Data_Collection\Dossier4\C027\Xerus erythropus\DSCF0172.JPG	DSCF0172.JPG	405682	768980	GardePro	10s	120	0.6	30	2024-06-24	11:13:40	2024-12-31	10:13:40	2024:07:12	2024-07-12	12:57:37	3.393	C027	Xerus erythropus	6.5	-30	DF	1322.08	3769.26	Koto	3302.8	2024-07-12 12:57:37	2024-06-24 11:13:40	2024-12-31 10:13:40	1	834	0.333	33.028
C:\Users\user-1\Desktop\My_PHD\5_Redaction_These\Chap2_Metabarcoding & Census\Census\1_Data_Collection\Dossier5\C035\Crossarchus obscurus\07120035.JPG	07120035.JPG	405710	769960	BUSHNEL	10s	35	0.6	33.5	2024-06-27	10:59:48	2024-12-31	9:59:48	2024:07:12	2024-07-12	16:04:46	4.21	C035	Crossarchus platycephalus	3.5	6	DF	604.665	3200.45	Koto	3302.8	2024-07-12 16:04:46	2024-06-27 10:59:48	2024-12-31 9:59:48	1	835	0.097	33.028
C:\Users\user-1\Desktop\My_PHD\5_Redaction_These\Chap2_Metabarcoding & Census\Census\1_Data_Collection\Dossier5\C035\Crossarchus obscurus\07120036.JPG	07120036.JPG	405710	769960	BUSHNEL	10s	35	0.6	33.5	2024-06-27	10:59:48	2024-12-31	9:59:48	2024:07:12	2024-07-12	16:04:46	4.21	C035	Crossarchus platycephalus	3.7	5	DF	604.665	3200.45	Koto	3302.8	2024-07-12 16:04:46	2024-06-27 10:59:48	2024-12-31 9:59:48	1	836	0.097	33.028
C:\Users\user-1\Desktop\My_PHD\5_Redaction_These\Chap2_Metabarcoding & Census\Census\1_Data_Collection\Dossier5\C035\Crossarchus obscurus\07120037.JPG	07120037.JPG	405710	769960	BUSHNEL	10s	35	0.6	33.5	2024-06-27	10:59:48	2024-12-31	9:59:48	2024:07:12	2024-07-12	19:12:04	5.027	C035	Crossarchus platycephalus	4	7	DF	604.665	3200.45	Koto	3302.8	2024-07-12 19:12:04	2024-06-27 10:59:48	2024-12-31 9:59:48	1	837	0.097	33.028
C:\Users\user-1\Desktop\My_PHD\5_Redaction_These\Chap2_Metabarcoding & Census\Census\1_Data_Collection\Dossier5\C035\Crossarchus obscurus\07120038.JPG	07120038.JPG	405710	769960	BUSHNEL	10s	35	0.6	33.5	2024-06-27	10:59:48	2024-12-31	9:59:48	2024:07:12	2024-07-12	19:12:04	5.027	C035	Crossarchus platycephalus	4	5	DF	604.665	3200.45	Koto	3302.8	2024-07-12 19:12:04	2024-06-27 10:59:48	2024-12-31 9:59:48	1	838	0.097	33.028
C:\Users\user-1\Desktop\My_PHD\5_Redaction_These\Chap2_Metabarcoding & Census\Census\1_Data_Collection\Dossier5\C035\Genetta genetta\07120025.JPG	07120025.JPG	405710	769960	BUSHNEL	10s	35	0.6	33.5	2024-06-27	10:59:48	2024-12-31	9:59:48	2024:07:12	2024-07-12	3:41:41	0.967	C035	Genetta pardina/maculata	1	0	DF	604.665	3200.45	Koto	3302.8	2024-07-12 3:41:41	2024-06-27 10:59:48	2024-12-31 9:59:48	1	839	0.097	33.028
C:\Users\user-1\Desktop\My_PHD\5_Redaction_These\Chap2_Metabarcoding & Census\Census\1_Data_Collection\Dossier5\C035\Genetta genetta\07120026.JPG	07120026.JPG	405710	769960	BUSHNEL	10s	35	0.6	33.5	2024-06-27	10:59:48	2024-12-31	9:59:48	2024:07:12	2024-07-12	3:41:41	0.967	C035	Genetta pardina/maculata	1	15	DF	604.665	3200.45	Koto	3302.8	2024-07-12 3:41:41	2024-06-27 10:59:48	2024-12-31 9:59:48	1	840	0.097	33.028
C:\Users\user-1\Desktop\My_PHD\5_Redaction_These\Chap2_Metabarcoding & Census\Census\1_Data_Collection\Dossier5\C035\Genetta genetta\07120027.JPG	07120027.JPG	405710	769960	BUSHNEL	10s	35	0.6	33.5	2024-06-27	10:59:48	2024-12-31	9:59:48	2024:07:12	2024-07-12	3:42:05	0.969	C035	Genetta pardina/maculata	4	10	DF	604.665	3200.45	Koto	3302.8	2024-07-12 3:42:05	2024-06-27 10:59:48	2024-12-31 9:59:48	1	841	0.097	33.028
C:\Users\user-1\Desktop\My_PHD\5_Redaction_These\Chap2_Metabarcoding & Census\Census\1_Data_Collection\Dossier5\C035\Genetta genetta\07120028.JPG	07120028.JPG	405710	769960	BUSHNEL	10s	35	0.6	33.5	2024-06-27	10:59:48	2024-12-31	9:59:48	2024:07:12	2024-07-12	3:42:05	0.969	C035	Genetta pardina/maculata	4	10	DF	604.665	3200.45	Koto	3302.8	2024-07-12 3:42:05	2024-06-27 10:59:48	2024-12-31 9:59:48	1	842	0.097	33.028
C:\Users\user-1\Desktop\My_PHD\5_Redaction_These\Chap2_Metabarcoding & Census\Census\1_Data_Collection\Dossier5\C035\Xerus erythropus\07120029.JPG	07120029.JPG	405710	769960	BUSHNEL	10s	35	0.6	33.5	2024-06-27	10:59:48	2024-12-31	9:59:48	2024:07:12	2024-07-12	7:54:15	2.069	C035	Xerus erythropus	2	-6	DF	604.665	3200.45	Koto	3302.8	2024-07-12 7:54:15	2024-06-27 10:59:48	2024-12-31 9:59:48	1	843	0.097	33.028
C:\Users\user-1\Desktop\My_PHD\5_Redaction_These\Chap2_Metabarcoding & Census\Census\1_Data_Collection\Dossier5\C035\Xerus erythropus\07120030.JPG	07120030.JPG	405710	769960	BUSHNEL	10s	35	0.6	33.5	2024-06-27	10:59:48	2024-12-31	9:59:48	2024:07:12	2024-07-12	7:54:15	2.069	C035	Xerus erythropus	2	-6	DF	604.665	3200.45	Koto	3302.8	2024-07-12 7:54:15	2024-06-27 10:59:48	2024-12-31 9:59:48	1	844	0.097	33.028
C:\Users\user-1\Desktop\My_PHD\5_Redaction_These\Chap2_Metabarcoding & Census\Census\1_Data_Collection\Dossier5\C035\Xerus erythropus\07120031.JPG	07120031.JPG	405710	769960	BUSHNEL	10s	35	0.6	33.5	2024-06-27	10:59:48	2024-12-31	9:59:48	2024:07:12	2024-07-12	7:54:52	2.072	C035	Xerus erythropus	3.5	-7	DF	604.665	3200.45	Koto	3302.8	2024-07-12 7:54:52	2024-06-27 10:59:48	2024-12-31 9:59:48	1	845	0.097	33.028
C:\Users\user-1\Desktop\My_PHD\5_Redaction_These\Chap2_Metabarcoding & Census\Census\1_Data_Collection\Dossier5\C035\Xerus erythropus\07120032.JPG	07120032.JPG	405710	769960	BUSHNEL	10s	35	0.6	33.5	2024-06-27	10:59:48	2024-12-31	9:59:48	2024:07:12	2024-07-12	7:54:53	2.072	C035	Xerus erythropus	3.5	-7	DF	604.665	3200.45	Koto	3302.8	2024-07-12 7:54:53	2024-06-27 10:59:48	2024-12-31 9:59:48	1	846	0.097	33.028
C:\Users\user-1\Desktop\My_PHD\5_Redaction_These\Chap2_Metabarcoding & Census\Census\1_Data_Collection\Dossier5\C035\Xerus erythropus\07120033.JPG	07120033.JPG	405710	769960	BUSHNEL	10s	35	0.6	33.5	2024-06-27	10:59:48	2024-12-31	9:59:48	2024:07:12	2024-07-12	7:55:18	2.074	C035	Xerus erythropus	3	-5	DF	604.665	3200.45	Koto	3302.8	2024-07-12 7:55:18	2024-06-27 10:59:48	2024-12-31 9:59:48	1	847	0.097	33.028
C:\Users\user-1\Desktop\My_PHD\5_Redaction_These\Chap2_Metabarcoding & Census\Census\1_Data_Collection\Dossier5\C035\Xerus erythropus\07120034.JPG	07120034.JPG	405710	769960	BUSHNEL	10s	35	0.6	33.5	2024-06-27	10:59:48	2024-12-31	9:59:48	2024:07:12	2024-07-12	7:55:18	2.074	C035	Xerus erythropus	3	-5	DF	604.665	3200.45	Koto	3302.8	2024-07-12 7:55:18	2024-06-27 10:59:48	2024-12-31 9:59:48	1	848	0.097	33.028
C:\Users\user-1\Desktop\My_PHD\5_Redaction_These\Chap2_Metabarcoding & Census\Census\1_Data_Collection\Dossier2\C019\Xerus erythropus\07120059.JPG	07120059.JPG	404700	767950	BUSHNEL	10s	35	0.6	33.5	2024-06-26	12:02:59	2024-12-31	11:02:59	2024:07:12	2024-07-12	07:46:33	2.03571	C019	Xerus erythropus	3	3	DF	1711.1	3936.84	Koto	3302.8	2024-07-12 07:46:33	2024-06-26 12:02:59	2024-12-31 11:02:59	1	849	0.097	33.028
C:\Users\user-1\Desktop\My_PHD\5_Redaction_These\Chap2_Metabarcoding & Census\Census\1_Data_Collection\Dossier2\C019\Xerus erythropus\07120060.JPG	07120060.JPG	404700	767950	BUSHNEL	10s	35	0.6	33.5	2024-06-26	12:02:59	2024-12-31	11:02:59	2024:07:12	2024-07-12	07:46:33	2.03571	C019	Xerus erythropus	3	3	DF	1711.1	3936.84	Koto	3302.8	2024-07-12 07:46:33	2024-06-26 12:02:59	2024-12-31 11:02:59	1	850	0.097	33.028
C:\Users\user-1\Desktop\My_PHD\5_Redaction_These\Chap2_Metabarcoding & Census\Census\1_Data_Collection\Dossier1\C013\Rattus sp.\07130007.JPG	07130007.JPG	406937	767134	BUSHNEL	10s	35	0.6	33.5	2024-07-06	16:11:03	2024-12-31	15:11:03	2024:07:13	2024-07-13	0:19:16	0.084	C013	Praomys sp.	3	-3	CF	305.923	3902.94	Akpe	1050.91	2024-07-13 0:19:16	2024-07-06 16:11:03	2024-12-31 15:11:03	1	851	0.097	10.5091
C:\Users\user-1\Desktop\My_PHD\5_Redaction_These\Chap2_Metabarcoding & Census\Census\1_Data_Collection\Dossier1\C013\Rattus sp.\07130008.JPG	07130008.JPG	406937	767134	BUSHNEL	10s	35	0.6	33.5	2024-07-06	16:11:03	2024-12-31	15:11:03	2024:07:13	2024-07-13	0:19:16	0.084	C013	Praomys sp.	3	-3	CF	305.923	3902.94	Akpe	1050.91	2024-07-13 0:19:16	2024-07-06 16:11:03	2024-12-31 15:11:03	1	852	0.097	10.5091
C:\Users\user-1\Desktop\My_PHD\5_Redaction_These\Chap2_Metabarcoding & Census\Census\1_Data_Collection\Dossier1\C013\Rattus sp.\07130009.JPG	07130009.JPG	406937	767134	BUSHNEL	10s	35	0.6	33.5	2024-07-06	16:11:03	2024-12-31	15:11:03	2024:07:13	2024-07-13	21:31:54	5.637	C013	Praomys sp.	3	-7	CF	305.923	3902.94	Akpe	1050.91	2024-07-13 21:31:54	2024-07-06 16:11:03	2024-12-31 15:11:03	1	853	0.097	10.5091
C:\Users\user-1\Desktop\My_PHD\5_Redaction_These\Chap2_Metabarcoding & Census\Census\1_Data_Collection\Dossier1\C013\Rattus sp.\07130010.JPG	07130010.JPG	406937	767134	BUSHNEL	10s	35	0.6	33.5	2024-07-06	16:11:03	2024-12-31	15:11:03	2024:07:13	2024-07-13	21:31:54	5.637	C013	Praomys sp.	3	-7	CF	305.923	3902.94	Akpe	1050.91	2024-07-13 21:31:54	2024-07-06 16:11:03	2024-12-31 15:11:03	1	854	0.097	10.5091
C:\Users\user-1\Desktop\My_PHD\5_Redaction_These\Chap2_Metabarcoding & Census\Census\1_Data_Collection\Dossier3\C023\Xerus erythropus\DSCF0043.JPG	DSCF0043.JPG	401833	769042	GardePro	10s	120	0.6	30	2024-07-01	13:50:17	2024-12-31	12:50:17	2024:07:13	2024-07-13	19:28:49	5.1	C023	Xerus erythropus	2	-15	DF	1610.83	2741.37	Koto	3302.8	2024-07-13 19:28:49	2024-07-01 13:50:17	2024-12-31 12:50:17	1	855	0.333	33.028
C:\Users\user-1\Desktop\My_PHD\5_Redaction_These\Chap2_Metabarcoding & Census\Census\1_Data_Collection\Dossier3\C023\Xerus erythropus\DSCF0044.JPG	DSCF0044.JPG	401833	769042	GardePro	10s	120	0.6	30	2024-07-01	13:50:17	2024-12-31	12:50:17	2024:07:13	2024-07-13	19:28:49	5.1	C023	Xerus erythropus	2	-15	DF	1610.83	2741.37	Koto	3302.8	2024-07-13 19:28:49	2024-07-01 13:50:17	2024-12-31 12:50:17	1	856	0.333	33.028
C:\Users\user-1\Desktop\My_PHD\5_Redaction_These\Chap2_Metabarcoding & Census\Census\1_Data_Collection\Dossier4\C027\Cercopithecus mona\DSCF0183.JPG	DSCF0183.JPG	405682	768980	GardePro	10s	120	0.6	30	2024-06-24	11:13:40	2024-12-31	10:13:40	2024:07:13	2024-07-13	17:07:29	4.483	C027	Cercopithecus mona	3	45	DF	1322.08	3769.26	Koto	3302.8	2024-07-13 17:07:29	2024-06-24 11:13:40	2024-12-31 10:13:40	1	857	0.333	33.028
C:\Users\user-1\Desktop\My_PHD\5_Redaction_These\Chap2_Metabarcoding & Census\Census\1_Data_Collection\Dossier4\C027\Cercopithecus mona\DSCF0184.JPG	DSCF0184.JPG	405682	768980	GardePro	10s	120	0.6	30	2024-06-24	11:13:40	2024-12-31	10:13:40	2024:07:13	2024-07-13	17:07:29	4.483	C027	Cercopithecus mona	3	45	DF	1322.08	3769.26	Koto	3302.8	2024-07-13 17:07:29	2024-06-24 11:13:40	2024-12-31 10:13:40	1	858	0.333	33.028
C:\Users\user-1\Desktop\My_PHD\5_Redaction_These\Chap2_Metabarcoding & Census\Census\1_Data_Collection\Dossier4\C027\Cercopithecus mona\DSCF0185.JPG	DSCF0185.JPG	405682	768980	GardePro	10s	120	0.6	30	2024-06-24	11:13:40	2024-12-31	10:13:40	2024:07:13	2024-07-13	17:07:40	4.484	C027	Cercopithecus mona	3	45	DF	1322.08	3769.26	Koto	3302.8	2024-07-13 17:07:40	2024-06-24 11:13:40	2024-12-31 10:13:40	1	859	0.333	33.028
C:\Users\user-1\Desktop\My_PHD\5_Redaction_These\Chap2_Metabarcoding & Census\Census\1_Data_Collection\Dossier4\C027\Cercopithecus mona\DSCF0186.JPG	DSCF0186.JPG	405682	768980	GardePro	10s	120	0.6	30	2024-06-24	11:13:40	2024-12-31	10:13:40	2024:07:13	2024-07-13	17:07:41	4.484	C027	Cercopithecus mona	3	45	DF	1322.08	3769.26	Koto	3302.8	2024-07-13 17:07:41	2024-06-24 11:13:40	2024-12-31 10:13:40	1	860	0.333	33.028
C:\Users\user-1\Desktop\My_PHD\5_Redaction_These\Chap2_Metabarcoding & Census\Census\1_Data_Collection\Dossier4\C027\Cercopithecus mona\DSCF0187.JPG	DSCF0187.JPG	405682	768980	GardePro	10s	120	0.6	30	2024-06-24	11:13:40	2024-12-31	10:13:40	2024:07:13	2024-07-13	17:07:46	4.484	C027	Cercopithecus mona	3	45	DF	1322.08	3769.26	Koto	3302.8	2024-07-13 17:07:46	2024-06-24 11:13:40	2024-12-31 10:13:40	1	861	0.333	33.028
C:\Users\user-1\Desktop\My_PHD\5_Redaction_These\Chap2_Metabarcoding & Census\Census\1_Data_Collection\Dossier4\C027\Cercopithecus mona\DSCF0188.JPG	DSCF0188.JPG	405682	768980	GardePro	10s	120	0.6	30	2024-06-24	11:13:40	2024-12-31	10:13:40	2024:07:13	2024-07-13	17:07:47	4.485	C027	Cercopithecus mona	3	45	DF	1322.08	3769.26	Koto	3302.8	2024-07-13 17:07:47	2024-06-24 11:13:40	2024-12-31 10:13:40	1	862	0.333	33.028
C:\Users\user-1\Desktop\My_PHD\5_Redaction_These\Chap2_Metabarcoding & Census\Census\1_Data_Collection\Dossier4\C027\Cercopithecus mona\DSCF0189.JPG	DSCF0189.JPG	405682	768980	GardePro	10s	120	0.6	30	2024-06-24	11:13:40	2024-12-31	10:13:40	2024:07:13	2024-07-13	17:07:51	4.485	C027	Cercopithecus mona	3	45	DF	1322.08	3769.26	Koto	3302.8	2024-07-13 17:07:51	2024-06-24 11:13:40	2024-12-31 10:13:40	1	863	0.333	33.028
C:\Users\user-1\Desktop\My_PHD\5_Redaction_These\Chap2_Metabarcoding & Census\Census\1_Data_Collection\Dossier4\C027\Cercopithecus mona\DSCF0190.JPG	DSCF0190.JPG	405682	768980	GardePro	10s	120	0.6	30	2024-06-24	11:13:40	2024-12-31	10:13:40	2024:07:13	2024-07-13	17:07:52	4.485	C027	Cercopithecus mona	3	45	DF	1322.08	3769.26	Koto	3302.8	2024-07-13 17:07:52	2024-06-24 11:13:40	2024-12-31 10:13:40	1	864	0.333	33.028
C:\Users\user-1\Desktop\My_PHD\5_Redaction_These\Chap2_Metabarcoding & Census\Census\1_Data_Collection\Dossier4\C027\Cercopithecus mona\DSCF0191.JPG	DSCF0191.JPG	405682	768980	GardePro	10s	120	0.6	30	2024-06-24	11:13:40	2024-12-31	10:13:40	2024:07:13	2024-07-13	17:07:56	4.485	C027	Cercopithecus mona	3	45	DF	1322.08	3769.26	Koto	3302.8	2024-07-13 17:07:56	2024-06-24 11:13:40	2024-12-31 10:13:40	1	865	0.333	33.028
C:\Users\user-1\Desktop\My_PHD\5_Redaction_These\Chap2_Metabarcoding & Census\Census\1_Data_Collection\Dossier4\C027\Cercopithecus mona\DSCF0192.JPG	DSCF0192.JPG	405682	768980	GardePro	10s	120	0.6	30	2024-06-24	11:13:40	2024-12-31	10:13:40	2024:07:13	2024-07-13	17:07:57	4.485	C027	Cercopithecus mona	3	45	DF	1322.08	3769.26	Koto	3302.8	2024-07-13 17:07:57	2024-06-24 11:13:40	2024-12-31 10:13:40	1	866	0.333	33.028
C:\Users\user-1\Desktop\My_PHD\5_Redaction_These\Chap2_Metabarcoding & Census\Census\1_Data_Collection\Dossier4\C027\Crossarchus obscurus\DSCF0177.JPG	DSCF0177.JPG	405682	768980	GardePro	10s	120	0.6	30	2024-06-24	11:13:40	2024-12-31	10:13:40	2024:07:13	2024-07-13	10:56:42	2.865	C027	Crossarchus platycephalus	6.5	5	DF	1322.08	3769.26	Koto	3302.8	2024-07-13 10:56:42	2024-06-24 11:13:40	2024-12-31 10:13:40	1	867	0.333	33.028
C:\Users\user-1\Desktop\My_PHD\5_Redaction_These\Chap2_Metabarcoding & Census\Census\1_Data_Collection\Dossier4\C027\Crossarchus obscurus\DSCF0178.JPG	DSCF0178.JPG	405682	768980	GardePro	10s	120	0.6	30	2024-06-24	11:13:40	2024-12-31	10:13:40	2024:07:13	2024-07-13	10:56:42	2.865	C027	Crossarchus platycephalus	6.5	30	DF	1322.08	3769.26	Koto	3302.8	2024-07-13 10:56:42	2024-06-24 11:13:40	2024-12-31 10:13:40	1	868	0.333	33.028
C:\Users\user-1\Desktop\My_PHD\5_Redaction_These\Chap2_Metabarcoding & Census\Census\1_Data_Collection\Dossier4\C027\Thryonomys swinderianus\DSCF0173.JPG	DSCF0173.JPG	405682	768980	GardePro	10s	120	0.6	30	2024-06-24	11:13:40	2024-12-31	10:13:40	2024:07:13	2024-07-13	3:39:43	0.959	C027	Atherurus africanus	7.5	-15	DF	1322.08	3769.26	Koto	3302.8	2024-07-13 3:39:43	2024-06-24 11:13:40	2024-12-31 10:13:40	1	869	0.333	33.028
C:\Users\user-1\Desktop\My_PHD\5_Redaction_These\Chap2_Metabarcoding & Census\Census\1_Data_Collection\Dossier4\C027\Thryonomys swinderianus\DSCF0174.JPG	DSCF0174.JPG	405682	768980	GardePro	10s	120	0.6	30	2024-06-24	11:13:40	2024-12-31	10:13:40	2024:07:13	2024-07-13	3:39:43	0.959	C027	Atherurus africanus	7.5	-10	DF	1322.08	3769.26	Koto	3302.8	2024-07-13 3:39:43	2024-06-24 11:13:40	2024-12-31 10:13:40	1	870	0.333	33.028
C:\Users\user-1\Desktop\My_PHD\5_Redaction_These\Chap2_Metabarcoding & Census\Census\1_Data_Collection\Dossier4\C027\Thryonomys swinderianus\DSCF0175.JPG	DSCF0175.JPG	405682	768980	GardePro	10s	120	0.6	30	2024-06-24	11:13:40	2024-12-31	10:13:40	2024:07:13	2024-07-13	3:39:47	0.959	C027	Atherurus africanus	7.5	25	DF	1322.08	3769.26	Koto	3302.8	2024-07-13 3:39:47	2024-06-24 11:13:40	2024-12-31 10:13:40	1	871	0.333	33.028
C:\Users\user-1\Desktop\My_PHD\5_Redaction_These\Chap2_Metabarcoding & Census\Census\1_Data_Collection\Dossier4\C027\Thryonomys swinderianus\DSCF0176.JPG	DSCF0176.JPG	405682	768980	GardePro	10s	120	0.6	30	2024-06-24	11:13:40	2024-12-31	10:13:40	2024:07:13	2024-07-13	3:39:47	0.959	C027	Atherurus africanus	7.5	25	DF	1322.08	3769.26	Koto	3302.8	2024-07-13 3:39:47	2024-06-24 11:13:40	2024-12-31 10:13:40	1	872	0.333	33.028
C:\Users\user-1\Desktop\My_PHD\5_Redaction_These\Chap2_Metabarcoding & Census\Census\1_Data_Collection\Dossier5\C033\Genetta genetta\DSCF0107.JPG	DSCF0107.JPG	403721	769978	GardePro	10s	120	0.6	30	2024-06-27	13:20:57	2024-12-31	12:20:57	2024:07:13	2024-07-13	20:03:13	5.25	C033	Genetta pardina/maculata	3.8	-25	DF	394.703	1701.99	Koto	3302.8	2024-07-13 20:03:13	2024-06-27 13:20:57	2024-12-31 12:20:57	1	873	0.333	33.028
C:\Users\user-1\Desktop\My_PHD\5_Redaction_These\Chap2_Metabarcoding & Census\Census\1_Data_Collection\Dossier5\C033\Genetta genetta\DSCF0108.JPG	DSCF0108.JPG	403721	769978	GardePro	10s	120	0.6	30	2024-06-27	13:20:57	2024-12-31	12:20:57	2024:07:13	2024-07-13	20:03:13	5.25	C033	Genetta pardina/maculata	4	-20	DF	394.703	1701.99	Koto	3302.8	2024-07-13 20:03:13	2024-06-27 13:20:57	2024-12-31 12:20:57	1	874	0.333	33.028
C:\Users\user-1\Desktop\My_PHD\5_Redaction_These\Chap2_Metabarcoding & Census\Census\1_Data_Collection\Dossier5\C033\Xerus erythropus\DSCF0105.JPG	DSCF0105.JPG	403721	769978	GardePro	10s	120	0.6	30	2024-06-27	13:20:57	2024-12-31	12:20:57	2024:07:13	2024-07-13	12:04:27	3.161	C033	Xerus erythropus	4.5	-5	DF	394.703	1701.99	Koto	3302.8	2024-07-13 12:04:27	2024-06-27 13:20:57	2024-12-31 12:20:57	1	875	0.333	33.028
C:\Users\user-1\Desktop\My_PHD\5_Redaction_These\Chap2_Metabarcoding & Census\Census\1_Data_Collection\Dossier5\C033\Xerus erythropus\DSCF0106.JPG	DSCF0106.JPG	403721	769978	GardePro	10s	120	0.6	30	2024-06-27	13:20:57	2024-12-31	12:20:57	2024:07:13	2024-07-13	12:04:27	3.161	C033	Xerus erythropus	4.5	-10	DF	394.703	1701.99	Koto	3302.8	2024-07-13 12:04:27	2024-06-27 13:20:57	2024-12-31 12:20:57	1	876	0.333	33.028
C:\Users\user-1\Desktop\My_PHD\5_Redaction_These\Chap2_Metabarcoding & Census\Census\1_Data_Collection\Dossier5\C035\Crossarchus obscurus\07130045.JPG	07130045.JPG	405710	769960	BUSHNEL	10s	35	0.6	33.5	2024-06-27	10:59:48	2024-12-31	9:59:48	2024:07:13	2024-07-13	11:35:39	3.035	C035	Crossarchus platycephalus	6	-7	DF	604.665	3200.45	Koto	3302.8	2024-07-13 11:35:39	2024-06-27 10:59:48	2024-12-31 9:59:48	1	877	0.097	33.028
C:\Users\user-1\Desktop\My_PHD\5_Redaction_These\Chap2_Metabarcoding & Census\Census\1_Data_Collection\Dossier5\C035\Crossarchus obscurus\07130045.JPG	07130045.JPG	405710	769960	BUSHNEL	10s	35	0.6	33.5	2024-06-27	10:59:48	2024-12-31	9:59:48	2024:07:13	2024-07-13	11:35:39	3.035	C035	Crossarchus platycephalus	6	-7	DF	604.665	3200.45	Koto	3302.8	2024-07-13 11:35:39	2024-06-27 10:59:48	2024-12-31 9:59:48	1	878	0.097	33.028
C:\Users\user-1\Desktop\My_PHD\5_Redaction_These\Chap2_Metabarcoding & Census\Census\1_Data_Collection\Dossier5\C035\Crossarchus obscurus\07130045.JPG	07130045.JPG	405710	769960	BUSHNEL	10s	35	0.6	33.5	2024-06-27	10:59:48	2024-12-31	9:59:48	2024:07:13	2024-07-13	11:35:39	3.035	C035	Crossarchus platycephalus	6	-7	DF	604.665	3200.45	Koto	3302.8	2024-07-13 11:35:39	2024-06-27 10:59:48	2024-12-31 9:59:48	1	879	0.097	33.028
C:\Users\user-1\Desktop\My_PHD\5_Redaction_These\Chap2_Metabarcoding & Census\Census\1_Data_Collection\Dossier5\C035\Crossarchus obscurus\07130046.JPG	07130046.JPG	405710	769960	BUSHNEL	10s	35	0.6	33.5	2024-06-27	10:59:48	2024-12-31	9:59:48	2024:07:13	2024-07-13	11:35:39	3.035	C035	Crossarchus platycephalus	6.5	-7	DF	604.665	3200.45	Koto	3302.8	2024-07-13 11:35:39	2024-06-27 10:59:48	2024-12-31 9:59:48	1	880	0.097	33.028
C:\Users\user-1\Desktop\My_PHD\5_Redaction_These\Chap2_Metabarcoding & Census\Census\1_Data_Collection\Dossier5\C035\Crossarchus obscurus\07130047.JPG	07130047.JPG	405710	769960	BUSHNEL	10s	35	0.6	33.5	2024-06-27	10:59:48	2024-12-31	9:59:48	2024:07:13	2024-07-13	11:48:32	3.092	C035	Crossarchus platycephalus	2.5	-6	DF	604.665	3200.45	Koto	3302.8	2024-07-13 11:48:32	2024-06-27 10:59:48	2024-12-31 9:59:48	1	881	0.097	33.028
C:\Users\user-1\Desktop\My_PHD\5_Redaction_These\Chap2_Metabarcoding & Census\Census\1_Data_Collection\Dossier5\C035\Crossarchus obscurus\07130048.JPG	07130048.JPG	405710	769960	BUSHNEL	10s	35	0.6	33.5	2024-06-27	10:59:48	2024-12-31	9:59:48	2024:07:13	2024-07-13	11:48:32	3.092	C035	Crossarchus platycephalus	3	-9	DF	604.665	3200.45	Koto	3302.8	2024-07-13 11:48:32	2024-06-27 10:59:48	2024-12-31 9:59:48	1	882	0.097	33.028
C:\Users\user-1\Desktop\My_PHD\5_Redaction_These\Chap2_Metabarcoding & Census\Census\1_Data_Collection\Dossier5\C035\Crossarchus obscurus\07130049.JPG	07130049.JPG	405710	769960	BUSHNEL	10s	35	0.6	33.5	2024-06-27	10:59:48	2024-12-31	9:59:48	2024:07:13	2024-07-13	11:48:50	3.093	C035	Crossarchus platycephalus	3	-5	DF	604.665	3200.45	Koto	3302.8	2024-07-13 11:48:50	2024-06-27 10:59:48	2024-12-31 9:59:48	1	883	0.097	33.028
C:\Users\user-1\Desktop\My_PHD\5_Redaction_These\Chap2_Metabarcoding & Census\Census\1_Data_Collection\Dossier5\C035\Crossarchus obscurus\07130050.JPG	07130050.JPG	405710	769960	BUSHNEL	10s	35	0.6	33.5	2024-06-27	10:59:48	2024-12-31	9:59:48	2024:07:13	2024-07-13	11:48:50	3.093	C035	Crossarchus platycephalus	3	-3	DF	604.665	3200.45	Koto	3302.8	2024-07-13 11:48:50	2024-06-27 10:59:48	2024-12-31 9:59:48	1	884	0.097	33.028
C:\Users\user-1\Desktop\My_PHD\5_Redaction_These\Chap2_Metabarcoding & Census\Census\1_Data_Collection\Dossier5\C035\Thryonomys swinderianus\07130039.JPG	07130039.JPG	405710	769960	BUSHNEL	10s	35	0.6	33.5	2024-06-27	10:59:48	2024-12-31	9:59:48	2024:07:13	2024-07-13	5:35:01	1.462	C035	Atherurus africanus	0.5	0	DF	604.665	3200.45	Koto	3302.8	2024-07-13 5:35:01	2024-06-27 10:59:48	2024-12-31 9:59:48	1	885	0.097	33.028
C:\Users\user-1\Desktop\My_PHD\5_Redaction_These\Chap2_Metabarcoding & Census\Census\1_Data_Collection\Dossier5\C035\Thryonomys swinderianus\07130040.JPG	07130040.JPG	405710	769960	BUSHNEL	10s	35	0.6	33.5	2024-06-27	10:59:48	2024-12-31	9:59:48	2024:07:13	2024-07-13	5:35:01	1.462	C035	Atherurus africanus	0.5	0	DF	604.665	3200.45	Koto	3302.8	2024-07-13 5:35:01	2024-06-27 10:59:48	2024-12-31 9:59:48	1	886	0.097	33.028
C:\Users\user-1\Desktop\My_PHD\5_Redaction_These\Chap2_Metabarcoding & Census\Census\1_Data_Collection\Dossier5\C035\Thryonomys swinderianus\07130041.JPG	07130041.JPG	405710	769960	BUSHNEL	10s	35	0.6	33.5	2024-06-27	10:59:48	2024-12-31	9:59:48	2024:07:13	2024-07-13	5:35:20	1.463	C035	Atherurus africanus	2	12	DF	604.665	3200.45	Koto	3302.8	2024-07-13 5:35:20	2024-06-27 10:59:48	2024-12-31 9:59:48	1	887	0.097	33.028
C:\Users\user-1\Desktop\My_PHD\5_Redaction_These\Chap2_Metabarcoding & Census\Census\1_Data_Collection\Dossier5\C035\Thryonomys swinderianus\07130042.JPG	07130042.JPG	405710	769960	BUSHNEL	10s	35	0.6	33.5	2024-06-27	10:59:48	2024-12-31	9:59:48	2024:07:13	2024-07-13	5:35:20	1.463	C035	Atherurus africanus	2	12	DF	604.665	3200.45	Koto	3302.8	2024-07-13 5:35:20	2024-06-27 10:59:48	2024-12-31 9:59:48	1	888	0.097	33.028
C:\Users\user-1\Desktop\My_PHD\5_Redaction_These\Chap2_Metabarcoding & Census\Census\1_Data_Collection\Dossier5\C035\Thryonomys swinderianus\07130043.JPG	07130043.JPG	405710	769960	BUSHNEL	10s	35	0.6	33.5	2024-06-27	10:59:48	2024-12-31	9:59:48	2024:07:13	2024-07-13	5:35:32	1.464	C035	Atherurus africanus	2	9	DF	604.665	3200.45	Koto	3302.8	2024-07-13 5:35:32	2024-06-27 10:59:48	2024-12-31 9:59:48	1	889	0.097	33.028
C:\Users\user-1\Desktop\My_PHD\5_Redaction_These\Chap2_Metabarcoding & Census\Census\1_Data_Collection\Dossier5\C035\Thryonomys swinderianus\07130044.JPG	07130044.JPG	405710	769960	BUSHNEL	10s	35	0.6	33.5	2024-06-27	10:59:48	2024-12-31	9:59:48	2024:07:13	2024-07-13	5:35:32	1.464	C035	Atherurus africanus	2	11	DF	604.665	3200.45	Koto	3302.8	2024-07-13 5:35:32	2024-06-27 10:59:48	2024-12-31 9:59:48	1	890	0.097	33.028
C:\Users\user-1\Desktop\My_PHD\5_Redaction_These\Chap2_Metabarcoding & Census\Census\1_Data_Collection\Dossier3\C024\Xerus erythropus\DSCF0011.JPG	DSCF0011.JPG	402768	769056	GardePro	10s	120	0.6	30	2024-07-01	12:24:15	2024-12-31	11:24:15	2024:07:14	2024-07-14	9:45:27	2.555	C024	Xerus erythropus	3.5	-25	DF	1482.76	2487.61	Koto	3302.8	2024-07-14 9:45:27	2024-07-01 12:24:15	2024-12-31 11:24:15	1	891	0.333	33.028
C:\Users\user-1\Desktop\My_PHD\5_Redaction_These\Chap2_Metabarcoding & Census\Census\1_Data_Collection\Dossier3\C024\Xerus erythropus\DSCF0012.JPG	DSCF0012.JPG	402768	769056	GardePro	10s	120	0.6	30	2024-07-01	12:24:15	2024-12-31	11:24:15	2024:07:14	2024-07-14	9:45:27	2.555	C024	Xerus erythropus	3.5	-20	DF	1482.76	2487.61	Koto	3302.8	2024-07-14 9:45:27	2024-07-01 12:24:15	2024-12-31 11:24:15	1	892	0.333	33.028
C:\Users\user-1\Desktop\My_PHD\5_Redaction_These\Chap2_Metabarcoding & Census\Census\1_Data_Collection\Dossier3\C026\Crossarchus obscurus\DSCF0039.JPG	DSCF0039.JPG	404727	768963	GardePro	10s	120	0.6	30	2024-06-24	12:34:07	2024-12-31	11:34:07	2024:07:14	2024-07-14	9:26:41	2.473	C026	Crossarchus platycephalus	3	-28	DF	1463.17	3087.76	Koto	3302.8	2024-07-14 9:26:41	2024-06-24 12:34:07	2024-12-31 11:34:07	1	893	0.333	33.028
C:\Users\user-1\Desktop\My_PHD\5_Redaction_These\Chap2_Metabarcoding & Census\Census\1_Data_Collection\Dossier3\C026\Crossarchus obscurus\DSCF0040.JPG	DSCF0040.JPG	404727	768963	GardePro	10s	120	0.6	30	2024-06-24	12:34:07	2024-12-31	11:34:07	2024:07:14	2024-07-14	9:26:41	2.473	C026	Crossarchus platycephalus	2	-35	DF	1463.17	3087.76	Koto	3302.8	2024-07-14 9:26:41	2024-06-24 12:34:07	2024-12-31 11:34:07	1	894	0.333	33.028
C:\Users\user-1\Desktop\My_PHD\5_Redaction_These\Chap2_Metabarcoding & Census\Census\1_Data_Collection\Dossier4\C027\Xerus erythropus\DSCF0193.JPG	DSCF0193.JPG	405682	768980	GardePro	10s	120	0.6	30	2024-06-24	11:13:40	2024-12-31	10:13:40	2024:07:14	2024-07-14	17:20:28	4.54	C027	Xerus erythropus	6.5	-25	DF	1322.08	3769.26	Koto	3302.8	2024-07-14 17:20:28	2024-06-24 11:13:40	2024-12-31 10:13:40	1	895	0.333	33.028
C:\Users\user-1\Desktop\My_PHD\5_Redaction_These\Chap2_Metabarcoding & Census\Census\1_Data_Collection\Dossier4\C027\Xerus erythropus\DSCF0194.JPG	DSCF0194.JPG	405682	768980	GardePro	10s	120	0.6	30	2024-06-24	11:13:40	2024-12-31	10:13:40	2024:07:14	2024-07-14	17:20:28	4.54	C027	Xerus erythropus	6.5	-30	DF	1322.08	3769.26	Koto	3302.8	2024-07-14 17:20:28	2024-06-24 11:13:40	2024-12-31 10:13:40	1	896	0.333	33.028
C:\Users\user-1\Desktop\My_PHD\5_Redaction_These\Chap2_Metabarcoding & Census\Census\1_Data_Collection\Dossier4\C027\Xerus erythropus\DSCF0195.JPG	DSCF0195.JPG	405682	768980	GardePro	10s	120	0.6	30	2024-06-24	11:13:40	2024-12-31	10:13:40	2024:07:14	2024-07-14	17:20:33	4.54	C027	Xerus erythropus	6	-40	DF	1322.08	3769.26	Koto	3302.8	2024-07-14 17:20:33	2024-06-24 11:13:40	2024-12-31 10:13:40	1	897	0.333	33.028
C:\Users\user-1\Desktop\My_PHD\5_Redaction_These\Chap2_Metabarcoding & Census\Census\1_Data_Collection\Dossier4\C027\Xerus erythropus\DSCF0196.JPG	DSCF0196.JPG	405682	768980	GardePro	10s	120	0.6	30	2024-06-24	11:13:40	2024-12-31	10:13:40	2024:07:14	2024-07-14	17:20:34	4.54	C027	Xerus erythropus	6	-40	DF	1322.08	3769.26	Koto	3302.8	2024-07-14 17:20:34	2024-06-24 11:13:40	2024-12-31 10:13:40	1	898	0.333	33.028
C:\Users\user-1\Desktop\My_PHD\5_Redaction_These\Chap2_Metabarcoding & Census\Census\1_Data_Collection\Dossier5\C033\Crossarchus obscurus\DSCF0109.JPG	DSCF0109.JPG	403721	769978	GardePro	10s	120	0.6	30	2024-06-27	13:20:57	2024-12-31	12:20:57	2024:07:14	2024-07-14	11:18:26	2.96	C033	Crossarchus platycephalus	3.5	30	DF	394.703	1701.99	Koto	3302.8	2024-07-14 11:18:26	2024-06-27 13:20:57	2024-12-31 12:20:57	1	899	0.333	33.028
C:\Users\user-1\Desktop\My_PHD\5_Redaction_These\Chap2_Metabarcoding & Census\Census\1_Data_Collection\Dossier5\C033\Crossarchus obscurus\DSCF0110.JPG	DSCF0110.JPG	403721	769978	GardePro	10s	120	0.6	30	2024-06-27	13:20:57	2024-12-31	12:20:57	2024:07:14	2024-07-14	11:18:27	2.96	C033	Crossarchus platycephalus	3.5	30	DF	394.703	1701.99	Koto	3302.8	2024-07-14 11:18:27	2024-06-27 13:20:57	2024-12-31 12:20:57	1	900	0.333	33.028
C:\Users\user-1\Desktop\My_PHD\5_Redaction_These\Chap2_Metabarcoding & Census\Census\1_Data_Collection\Dossier5\C033\Crossarchus obscurus\DSCF0111.JPG	DSCF0111.JPG	403721	769978	GardePro	10s	120	0.6	30	2024-06-27	13:20:57	2024-12-31	12:20:57	2024:07:14	2024-07-14	11:18:30	2.961	C033	Crossarchus platycephalus	3	-40	DF	394.703	1701.99	Koto	3302.8	2024-07-14 11:18:30	2024-06-27 13:20:57	2024-12-31 12:20:57	1	901	0.333	33.028
C:\Users\user-1\Desktop\My_PHD\5_Redaction_These\Chap2_Metabarcoding & Census\Census\1_Data_Collection\Dossier5\C033\Crossarchus obscurus\DSCF0112.JPG	DSCF0112.JPG	403721	769978	GardePro	10s	120	0.6	30	2024-06-27	13:20:57	2024-12-31	12:20:57	2024:07:14	2024-07-14	11:18:30	2.961	C033	Crossarchus platycephalus	3	-40	DF	394.703	1701.99	Koto	3302.8	2024-07-14 11:18:30	2024-06-27 13:20:57	2024-12-31 12:20:57	1	902	0.333	33.028
C:\Users\user-1\Desktop\My_PHD\5_Redaction_These\Chap2_Metabarcoding & Census\Census\1_Data_Collection\Dossier5\C035\Potamochoerus porcus\07140051.JPG	07140051.JPG	405710	769960	BUSHNEL	10s	35	0.6	33.5	2024-06-27	10:59:48	2024-12-31	9:59:48	2024:07:14	2024-07-14	20:42:48	5.423	C035	Potamochoerus porcus	1.5	-17.5	DF	604.665	3200.45	Koto	3302.8	2024-07-14 20:42:48	2024-06-27 10:59:48	2024-12-31 9:59:48	1	903	0.097	33.028
C:\Users\user-1\Desktop\My_PHD\5_Redaction_These\Chap2_Metabarcoding & Census\Census\1_Data_Collection\Dossier5\C035\Potamochoerus porcus\07140052.JPG	07140052.JPG	405710	769960	BUSHNEL	10s	35	0.6	33.5	2024-06-27	10:59:48	2024-12-31	9:59:48	2024:07:14	2024-07-14	20:42:48	5.423	C035	Potamochoerus porcus	2	-16	DF	604.665	3200.45	Koto	3302.8	2024-07-14 20:42:48	2024-06-27 10:59:48	2024-12-31 9:59:48	1	904	0.097	33.028
C:\Users\user-1\Desktop\My_PHD\5_Redaction_These\Chap2_Metabarcoding & Census\Census\1_Data_Collection\Dossier5\C035\Potamochoerus porcus\07140053.JPG	07140053.JPG	405710	769960	BUSHNEL	10s	35	0.6	33.5	2024-06-27	10:59:48	2024-12-31	9:59:48	2024:07:14	2024-07-14	20:43:00	5.424	C035	Potamochoerus porcus	4	-3	DF	604.665	3200.45	Koto	3302.8	2024-07-14 20:43:00	2024-06-27 10:59:48	2024-12-31 9:59:48	1	905	0.097	33.028
C:\Users\user-1\Desktop\My_PHD\5_Redaction_These\Chap2_Metabarcoding & Census\Census\1_Data_Collection\Dossier5\C035\Potamochoerus porcus\07140054.JPG	07140054.JPG	405710	769960	BUSHNEL	10s	35	0.6	33.5	2024-06-27	10:59:48	2024-12-31	9:59:48	2024:07:14	2024-07-14	20:43:00	5.424	C035	Potamochoerus porcus	4	-3	DF	604.665	3200.45	Koto	3302.8	2024-07-14 20:43:00	2024-06-27 10:59:48	2024-12-31 9:59:48	1	906	0.097	33.028
C:\Users\user-1\Desktop\My_PHD\5_Redaction_These\Chap2_Metabarcoding & Census\Census\1_Data_Collection\Dossier2\C019\Cercopithecus mona\07140063.JPG	07140063.JPG	404700	767950	BUSHNEL	10s	35	0.6	33.5	2024-06-26	12:02:59	2024-12-31	11:02:59	2024:07:14	2024-07-14	17:20:35	4.5404	C019	Cercopithecus mona	3.5	10	DF	1711.1	3936.84	Koto	3302.8	2024-07-14 17:20:35	2024-06-26 12:02:59	2024-12-31 11:02:59	1	907	0.097	33.028
C:\Users\user-1\Desktop\My_PHD\5_Redaction_These\Chap2_Metabarcoding & Census\Census\1_Data_Collection\Dossier2\C019\Cercopithecus mona\07140064.JPG	07140064.JPG	404700	767950	BUSHNEL	10s	35	0.6	33.5	2024-06-26	12:02:59	2024-12-31	11:02:59	2024:07:14	2024-07-14	17:20:35	4.5404	C019	Cercopithecus mona	3.5	9	DF	1711.1	3936.84	Koto	3302.8	2024-07-14 17:20:35	2024-06-26 12:02:59	2024-12-31 11:02:59	1	908	0.097	33.028
C:\Users\user-1\Desktop\My_PHD\5_Redaction_These\Chap2_Metabarcoding & Census\Census\1_Data_Collection\Dossier2\C019\Cercopithecus mona\07140065.JPG	07140065.JPG	404700	767950	BUSHNEL	10s	35	0.6	33.5	2024-06-26	12:02:59	2024-12-31	11:02:59	2024:07:14	2024-07-14	17:20:54	4.54178	C019	Cercopithecus mona	3.5	-6	DF	1711.1	3936.84	Koto	3302.8	2024-07-14 17:20:54	2024-06-26 12:02:59	2024-12-31 11:02:59	1	909	0.097	33.028
C:\Users\user-1\Desktop\My_PHD\5_Redaction_These\Chap2_Metabarcoding & Census\Census\1_Data_Collection\Dossier2\C019\Cercopithecus mona\07140066.JPG	07140066.JPG	404700	767950	BUSHNEL	10s	35	0.6	33.5	2024-06-26	12:02:59	2024-12-31	11:02:59	2024:07:14	2024-07-14	17:20:55	4.54186	C019	Cercopithecus mona	3	-12	DF	1711.1	3936.84	Koto	3302.8	2024-07-14 17:20:55	2024-06-26 12:02:59	2024-12-31 11:02:59	1	910	0.097	33.028
C:\Users\user-1\Desktop\My_PHD\5_Redaction_These\Chap2_Metabarcoding & Census\Census\1_Data_Collection\Dossier2\C019\Cercopithecus mona\07140067.JPG	07140067.JPG	404700	767950	BUSHNEL	10s	35	0.6	33.5	2024-06-26	12:02:59	2024-12-31	11:02:59	2024:07:14	2024-07-14	17:22:35	4.54913	C019	Cercopithecus mona	1.2	-15	DF	1711.1	3936.84	Koto	3302.8	2024-07-14 17:22:35	2024-06-26 12:02:59	2024-12-31 11:02:59	1	911	0.097	33.028
C:\Users\user-1\Desktop\My_PHD\5_Redaction_These\Chap2_Metabarcoding & Census\Census\1_Data_Collection\Dossier2\C019\Cercopithecus mona\07140068.JPG	07140068.JPG	404700	767950	BUSHNEL	10s	35	0.6	33.5	2024-06-26	12:02:59	2024-12-31	11:02:59	2024:07:14	2024-07-14	17:22:35	4.54913	C019	Cercopithecus mona	1.2	-15	DF	1711.1	3936.84	Koto	3302.8	2024-07-14 17:22:35	2024-06-26 12:02:59	2024-12-31 11:02:59	1	912	0.097	33.028
C:\Users\user-1\Desktop\My_PHD\5_Redaction_These\Chap2_Metabarcoding & Census\Census\1_Data_Collection\Dossier2\C019\Cercopithecus mona\07140069.JPG	07140069.JPG	404700	767950	BUSHNEL	10s	35	0.6	33.5	2024-06-26	12:02:59	2024-12-31	11:02:59	2024:07:14	2024-07-14	17:22:45	4.54986	C019	Cercopithecus mona	1.2	-15	DF	1711.1	3936.84	Koto	3302.8	2024-07-14 17:22:45	2024-06-26 12:02:59	2024-12-31 11:02:59	1	913	0.097	33.028
C:\Users\user-1\Desktop\My_PHD\5_Redaction_These\Chap2_Metabarcoding & Census\Census\1_Data_Collection\Dossier2\C019\Cercopithecus mona\07140070.JPG	07140070.JPG	404700	767950	BUSHNEL	10s	35	0.6	33.5	2024-06-26	12:02:59	2024-12-31	11:02:59	2024:07:14	2024-07-14	17:22:45	4.54986	C019	Cercopithecus mona	2	14	DF	1711.1	3936.84	Koto	3302.8	2024-07-14 17:22:45	2024-06-26 12:02:59	2024-12-31 11:02:59	1	914	0.097	33.028
C:\Users\user-1\Desktop\My_PHD\5_Redaction_These\Chap2_Metabarcoding & Census\Census\1_Data_Collection\Dossier2\C019\Cercopithecus mona\07140071.JPG	07140071.JPG	404700	767950	BUSHNEL	10s	35	0.6	33.5	2024-06-26	12:02:59	2024-12-31	11:02:59	2024:07:14	2024-07-14	17:23:08	4.55153	C019	Cercopithecus mona	2	16	DF	1711.1	3936.84	Koto	3302.8	2024-07-14 17:23:08	2024-06-26 12:02:59	2024-12-31 11:02:59	1	915	0.097	33.028
C:\Users\user-1\Desktop\My_PHD\5_Redaction_These\Chap2_Metabarcoding & Census\Census\1_Data_Collection\Dossier2\C019\Cercopithecus mona\07140072.JPG	07140072.JPG	404700	767950	BUSHNEL	10s	35	0.6	33.5	2024-06-26	12:02:59	2024-12-31	11:02:59	2024:07:14	2024-07-14	17:23:09	4.5516	C019	Cercopithecus mona	2	16	DF	1711.1	3936.84	Koto	3302.8	2024-07-14 17:23:09	2024-06-26 12:02:59	2024-12-31 11:02:59	1	916	0.097	33.028
C:\Users\user-1\Desktop\My_PHD\5_Redaction_These\Chap2_Metabarcoding & Census\Census\1_Data_Collection\Dossier2\C019\Cercopithecus mona\07140073.JPG	07140073.JPG	404700	767950	BUSHNEL	10s	35	0.6	33.5	2024-06-26	12:02:59	2024-12-31	11:02:59	2024:07:14	2024-07-14	17:23:34	4.55342	C019	Cercopithecus mona	1.2	-17.5	DF	1711.1	3936.84	Koto	3302.8	2024-07-14 17:23:34	2024-06-26 12:02:59	2024-12-31 11:02:59	1	917	0.097	33.028
C:\Users\user-1\Desktop\My_PHD\5_Redaction_These\Chap2_Metabarcoding & Census\Census\1_Data_Collection\Dossier2\C019\Cercopithecus mona\07140074.JPG	07140074.JPG	404700	767950	BUSHNEL	10s	35	0.6	33.5	2024-06-26	12:02:59	2024-12-31	11:02:59	2024:07:14	2024-07-14	17:23:35	4.55349	C019	Cercopithecus mona	1.2	-17.5	DF	1711.1	3936.84	Koto	3302.8	2024-07-14 17:23:35	2024-06-26 12:02:59	2024-12-31 11:02:59	1	918	0.097	33.028
C:\Users\user-1\Desktop\My_PHD\5_Redaction_These\Chap2_Metabarcoding & Census\Census\1_Data_Collection\Dossier2\C019\Cercopithecus mona\07140075.JPG	07140075.JPG	404700	767950	BUSHNEL	10s	35	0.6	33.5	2024-06-26	12:02:59	2024-12-31	11:02:59	2024:07:14	2024-07-14	17:23:46	4.55429	C019	Cercopithecus mona	2	3	DF	1711.1	3936.84	Koto	3302.8	2024-07-14 17:23:46	2024-06-26 12:02:59	2024-12-31 11:02:59	1	919	0.097	33.028
C:\Users\user-1\Desktop\My_PHD\5_Redaction_These\Chap2_Metabarcoding & Census\Census\1_Data_Collection\Dossier2\C019\Cercopithecus mona\07140075.JPG	07140075.JPG	404700	767950	BUSHNEL	10s	35	0.6	33.5	2024-06-26	12:02:59	2024-12-31	11:02:59	2024:07:14	2024-07-14	17:23:46	4.55429	C019	Cercopithecus mona	2	3	DF	1711.1	3936.84	Koto	3302.8	2024-07-14 17:23:46	2024-06-26 12:02:59	2024-12-31 11:02:59	1	920	0.097	33.028
C:\Users\user-1\Desktop\My_PHD\5_Redaction_These\Chap2_Metabarcoding & Census\Census\1_Data_Collection\Dossier2\C019\Cercopithecus mona\07140076.JPG	07140076.JPG	404700	767950	BUSHNEL	10s	35	0.6	33.5	2024-06-26	12:02:59	2024-12-31	11:02:59	2024:07:14	2024-07-14	17:23:46	4.55429	C019	Cercopithecus mona	2	3	DF	1711.1	3936.84	Koto	3302.8	2024-07-14 17:23:46	2024-06-26 12:02:59	2024-12-31 11:02:59	1	921	0.097	33.028
C:\Users\user-1\Desktop\My_PHD\5_Redaction_These\Chap2_Metabarcoding & Census\Census\1_Data_Collection\Dossier2\C019\Cercopithecus mona\07140076.JPG	07140076.JPG	404700	767950	BUSHNEL	10s	35	0.6	33.5	2024-06-26	12:02:59	2024-12-31	11:02:59	2024:07:14	2024-07-14	17:23:46	4.55429	C019	Cercopithecus mona	2	3	DF	1711.1	3936.84	Koto	3302.8	2024-07-14 17:23:46	2024-06-26 12:02:59	2024-12-31 11:02:59	1	922	0.097	33.028
C:\Users\user-1\Desktop\My_PHD\5_Redaction_These\Chap2_Metabarcoding & Census\Census\1_Data_Collection\Dossier2\C019\Cercopithecus mona\07140077.JPG	07140077.JPG	404700	767950	BUSHNEL	10s	35	0.6	33.5	2024-06-26	12:02:59	2024-12-31	11:02:59	2024:07:14	2024-07-14	17:23:56	4.55502	C019	Cercopithecus mona	2	3	DF	1711.1	3936.84	Koto	3302.8	2024-07-14 17:23:56	2024-06-26 12:02:59	2024-12-31 11:02:59	1	923	0.097	33.028
C:\Users\user-1\Desktop\My_PHD\5_Redaction_These\Chap2_Metabarcoding & Census\Census\1_Data_Collection\Dossier2\C019\Cercopithecus mona\07140077.JPG	07140077.JPG	404700	767950	BUSHNEL	10s	35	0.6	33.5	2024-06-26	12:02:59	2024-12-31	11:02:59	2024:07:14	2024-07-14	17:23:56	4.55502	C019	Cercopithecus mona	2	3	DF	1711.1	3936.84	Koto	3302.8	2024-07-14 17:23:56	2024-06-26 12:02:59	2024-12-31 11:02:59	1	924	0.097	33.028
C:\Users\user-1\Desktop\My_PHD\5_Redaction_These\Chap2_Metabarcoding & Census\Census\1_Data_Collection\Dossier2\C019\Cercopithecus mona\07140078.JPG	07140078.JPG	404700	767950	BUSHNEL	10s	35	0.6	33.5	2024-06-26	12:02:59	2024-12-31	11:02:59	2024:07:14	2024-07-14	17:23:56	4.55502	C019	Cercopithecus mona	2	3	DF	1711.1	3936.84	Koto	3302.8	2024-07-14 17:23:56	2024-06-26 12:02:59	2024-12-31 11:02:59	1	925	0.097	33.028
C:\Users\user-1\Desktop\My_PHD\5_Redaction_These\Chap2_Metabarcoding & Census\Census\1_Data_Collection\Dossier2\C019\Cercopithecus mona\07140078.JPG	07140078.JPG	404700	767950	BUSHNEL	10s	35	0.6	33.5	2024-06-26	12:02:59	2024-12-31	11:02:59	2024:07:14	2024-07-14	17:23:56	4.55502	C019	Cercopithecus mona	2	3	DF	1711.1	3936.84	Koto	3302.8	2024-07-14 17:23:56	2024-06-26 12:02:59	2024-12-31 11:02:59	1	926	0.097	33.028
C:\Users\user-1\Desktop\My_PHD\5_Redaction_These\Chap2_Metabarcoding & Census\Census\1_Data_Collection\Dossier2\C019\Cercopithecus mona\07140079.JPG	07140079.JPG	404700	767950	BUSHNEL	10s	35	0.6	33.5	2024-06-26	12:02:59	2024-12-31	11:02:59	2024:07:14	2024-07-14	17:24:09	4.55596	C019	Cercopithecus mona	2	3	DF	1711.1	3936.84	Koto	3302.8	2024-07-14 17:24:09	2024-06-26 12:02:59	2024-12-31 11:02:59	1	927	0.097	33.028
C:\Users\user-1\Desktop\My_PHD\5_Redaction_These\Chap2_Metabarcoding & Census\Census\1_Data_Collection\Dossier2\C019\Cercopithecus mona\07140079.JPG	07140079.JPG	404700	767950	BUSHNEL	10s	35	0.6	33.5	2024-06-26	12:02:59	2024-12-31	11:02:59	2024:07:14	2024-07-14	17:24:09	4.55596	C019	Cercopithecus mona	2	3	DF	1711.1	3936.84	Koto	3302.8	2024-07-14 17:24:09	2024-06-26 12:02:59	2024-12-31 11:02:59	1	928	0.097	33.028
C:\Users\user-1\Desktop\My_PHD\5_Redaction_These\Chap2_Metabarcoding & Census\Census\1_Data_Collection\Dossier2\C019\Cercopithecus mona\07140080.JPG	07140080.JPG	404700	767950	BUSHNEL	10s	35	0.6	33.5	2024-06-26	12:02:59	2024-12-31	11:02:59	2024:07:14	2024-07-14	17:24:09	4.55596	C019	Cercopithecus mona	2	3	DF	1711.1	3936.84	Koto	3302.8	2024-07-14 17:24:09	2024-06-26 12:02:59	2024-12-31 11:02:59	1	929	0.097	33.028
C:\Users\user-1\Desktop\My_PHD\5_Redaction_These\Chap2_Metabarcoding & Census\Census\1_Data_Collection\Dossier2\C019\Cercopithecus mona\07140080.JPG	07140080.JPG	404700	767950	BUSHNEL	10s	35	0.6	33.5	2024-06-26	12:02:59	2024-12-31	11:02:59	2024:07:14	2024-07-14	17:24:09	4.55596	C019	Cercopithecus mona	2	3	DF	1711.1	3936.84	Koto	3302.8	2024-07-14 17:24:09	2024-06-26 12:02:59	2024-12-31 11:02:59	1	930	0.097	33.028
C:\Users\user-1\Desktop\My_PHD\5_Redaction_These\Chap2_Metabarcoding & Census\Census\1_Data_Collection\Dossier2\C019\Xerus erythropus\07140061.JPG	07140061.JPG	404700	767950	BUSHNEL	10s	35	0.6	33.5	2024-06-26	12:02:59	2024-12-31	11:02:59	2024:07:14	2024-07-14	09:35:17	2.51015	C019	Xerus erythropus	3	-3	DF	1711.1	3936.84	Koto	3302.8	2024-07-14 09:35:17	2024-06-26 12:02:59	2024-12-31 11:02:59	1	931	0.097	33.028
C:\Users\user-1\Desktop\My_PHD\5_Redaction_These\Chap2_Metabarcoding & Census\Census\1_Data_Collection\Dossier2\C019\Xerus erythropus\07140062.JPG	07140062.JPG	404700	767950	BUSHNEL	10s	35	0.6	33.5	2024-06-26	12:02:59	2024-12-31	11:02:59	2024:07:14	2024-07-14	09:35:17	2.51015	C019	Xerus erythropus	3	-3	DF	1711.1	3936.84	Koto	3302.8	2024-07-14 09:35:17	2024-06-26 12:02:59	2024-12-31 11:02:59	1	932	0.097	33.028
C:\Users\user-1\Desktop\My_PHD\5_Redaction_These\Chap2_Metabarcoding & Census\Census\1_Data_Collection\Dossier3\C023\Xerus erythropus\DSCF0047.JPG	DSCF0047.JPG	401833	769042	GardePro	10s	120	0.6	30	2024-07-01	13:50:17	2024-12-31	12:50:17	2024:07:15	2024-07-15	10:28:44	2.743	C023	Xerus erythropus	3	-40	DF	1610.83	2741.37	Koto	3302.8	2024-07-15 10:28:44	2024-07-01 13:50:17	2024-12-31 12:50:17	1	933	0.333	33.028
C:\Users\user-1\Desktop\My_PHD\5_Redaction_These\Chap2_Metabarcoding & Census\Census\1_Data_Collection\Dossier3\C023\Xerus erythropus\DSCF0048.JPG	DSCF0048.JPG	401833	769042	GardePro	10s	120	0.6	30	2024-07-01	13:50:17	2024-12-31	12:50:17	2024:07:15	2024-07-15	10:28:45	2.743	C023	Xerus erythropus	3	-45	DF	1610.83	2741.37	Koto	3302.8	2024-07-15 10:28:45	2024-07-01 13:50:17	2024-12-31 12:50:17	1	934	0.333	33.028
C:\Users\user-1\Desktop\My_PHD\5_Redaction_These\Chap2_Metabarcoding & Census\Census\1_Data_Collection\Dossier3\C024\Xerus erythropus\DSCF0013.JPG	DSCF0013.JPG	402768	769056	GardePro	10s	120	0.6	30	2024-07-01	12:24:15	2024-12-31	11:24:15	2024:07:15	2024-07-15	8:32:03	2.234	C024	Xerus erythropus	3	-45	DF	1482.76	2487.61	Koto	3302.8	2024-07-15 8:32:03	2024-07-01 12:24:15	2024-12-31 11:24:15	1	935	0.333	33.028
C:\Users\user-1\Desktop\My_PHD\5_Redaction_These\Chap2_Metabarcoding & Census\Census\1_Data_Collection\Dossier3\C024\Xerus erythropus\DSCF0014.JPG	DSCF0014.JPG	402768	769056	GardePro	10s	120	0.6	30	2024-07-01	12:24:15	2024-12-31	11:24:15	2024:07:15	2024-07-15	8:32:03	2.234	C024	Xerus erythropus	3	-45	DF	1482.76	2487.61	Koto	3302.8	2024-07-15 8:32:03	2024-07-01 12:24:15	2024-12-31 11:24:15	1	936	0.333	33.028
C:\Users\user-1\Desktop\My_PHD\5_Redaction_These\Chap2_Metabarcoding & Census\Census\1_Data_Collection\Dossier5\C033\Xerus erythropus\DSCF0113.JPG	DSCF0113.JPG	403721	769978	GardePro	10s	120	0.6	30	2024-06-27	13:20:57	2024-12-31	12:20:57	2024:07:15	2024-07-15	14:31:31	3.803	C033	Xerus erythropus	4.5	15	DF	394.703	1701.99	Koto	3302.8	2024-07-15 14:31:31	2024-06-27 13:20:57	2024-12-31 12:20:57	1	937	0.333	33.028
C:\Users\user-1\Desktop\My_PHD\5_Redaction_These\Chap2_Metabarcoding & Census\Census\1_Data_Collection\Dossier5\C033\Xerus erythropus\DSCF0114.JPG	DSCF0114.JPG	403721	769978	GardePro	10s	120	0.6	30	2024-06-27	13:20:57	2024-12-31	12:20:57	2024:07:15	2024-07-15	14:31:32	3.803	C033	Xerus erythropus	4.5	15	DF	394.703	1701.99	Koto	3302.8	2024-07-15 14:31:32	2024-06-27 13:20:57	2024-12-31 12:20:57	1	938	0.333	33.028
C:\Users\user-1\Desktop\My_PHD\5_Redaction_These\Chap2_Metabarcoding & Census\Census\1_Data_Collection\Dossier1\C010\Xerus erythropus\DSCF0039.JPG	DSCF0039.JPG	403182	767030	GardePro	10s	120	0.6	30	2024-07-06	13:45:47	2024-12-31	12:45:47	2024:07:16	2024-07-16	5:05:07	1.331	C010	Xerus erythropus	5	40	CF	1423.16	4559.62	Koto	1050.91	2024-07-16 5:05:07	2024-07-06 13:45:47	2024-12-31 12:45:47	1	939	0.333	10.5091
C:\Users\user-1\Desktop\My_PHD\5_Redaction_These\Chap2_Metabarcoding & Census\Census\1_Data_Collection\Dossier1\C010\Xerus erythropus\DSCF0040.JPG	DSCF0040.JPG	403182	767030	GardePro	10s	120	0.6	30	2024-07-06	13:45:47	2024-12-31	12:45:47	2024:07:16	2024-07-16	5:05:07	1.331	C010	Xerus erythropus	5	40	CF	1423.16	4559.62	Koto	1050.91	2024-07-16 5:05:07	2024-07-06 13:45:47	2024-12-31 12:45:47	1	940	0.333	10.5091
[truncated: 7,023 more rows]
